# Supplementary material for: Dehydration in water: frustrated Lewis pairs directly catalyzed allylization of electron-rich arenes and allyl alcohols
Source: Royal Society of Chemistry journal article supplement (doi:10.1039/d0ra02912b), 2020-01-01

## Supporting Information

For

### Dehydration in Water: Frustrated Lewis Pairs Catalyzed Directly

#### Allylization of Electron-Rich Arenes and Allyl Alcohols

Hua Zhang<sup>a,b</sup>, Xiao-Yu Zhan<sup>a,b</sup>, Yu Dong<sup>a,b</sup>, Jian Yang<sup>a,b</sup>, Shuai He<sup>c</sup>, Zhi-Chuan Shi<sup>c</sup>,  
Xiao-Mei Zhang<sup>a</sup>, Ji-Yu Wang<sup>\*,a</sup>

<sup>a</sup>Chengdu Institute of Organic Chemistry, Chinese Academy of Sciences, Chengdu 610041, P. R. China.

<sup>b</sup>University of Chinese Academy of Sciences, Beijing 100049, P. R. China.

<sup>c</sup>Southwest Minzu University, Chengdu 610041, P. R. China.

***E-mail: [Jiyuwang@cioc.ac.cn](mailto:Jiyuwang@cioc.ac.cn)***

#### Contents

|                                     |          |
|-------------------------------------|----------|
| 1. General Information              | S2-S4    |
| 2. Substrate of Synthesis           | S4-S6    |
| 3. Typical Synthesis Procedure of 3 | S6       |
| 4. Characterization of 3            | S7-S25   |
| 5. X-Ray Analysis                   | S26      |
| 6. References                       | S27-S28  |
| 7. Copies of NMR Spectra            | S29-S106 |

## 1. General Information:

All template reaction experiments were carried out under atmospheric conditions. Thin layer chromatography was carried out in the ultraviolet light using a GF-254 silica gel plate. Column chromatography was carried out using 200-300 mesh silica gel.  $^1\text{H}$  NMR,  $^{13}\text{C}$  NMR and  $^{19}\text{F}$  NMR spectra were recorded at 400 MHz on an Agilent spectrometer.  $\text{CDCl}_3$  was used as solvent. Chemical shifts were referenced relative to residual solvent. Coupling constants (J) were reported in Hertz (Hz). HRMS were performed on a Thermo Scientific LTQ Orbitrap XL instrument. Melting points were measured with micro melting point apparatus. Tris(pentafluorophenyl)borane (energy chemical, 97%), 2,6-lutidine (kelong, 99%), N,N-dimethylaniline (**1a**, rhawn, 98%), 1,2,3-trimethoxybenzene (**1l**, bidepharm, 98%), 1H-indole (**1m**, bidepharm, 98%), 1-methyl-1H-indole (**1n**, adamas, 98%), 2-methyl-1H-indole (**1r**, bide, 98%), 2-phenyl-1H-indole (**1s**, adamas, 98%), 5-methoxy-1H-indole (**1t**, bidepharm, 98%), 6-chloro-1H-indole (**1u**, adamas, 98%), 5,6-dichloro-1H-indole (**1v**, bidepharm, 98%) were commercial available, and the N-substituted aromatic amines **1b-1e**, **1h-1k**<sup>[1]</sup>, N-cycloarylamines **1f-1g**<sup>[2]</sup>, **1o**<sup>[3]</sup>, **1p**<sup>[4]</sup>, **1q**<sup>[5]</sup> and **2a-2r**<sup>[6], [7]</sup> were prepared according to literature.

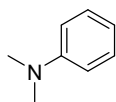

1a

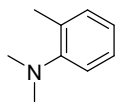

1b

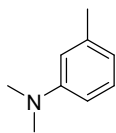

1c

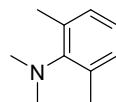

1d

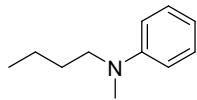

1e

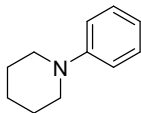

1f

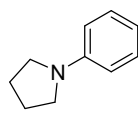

1g

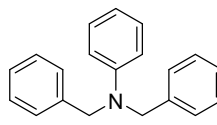

1h

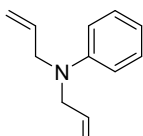

1i

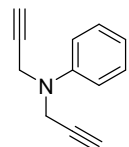

1j

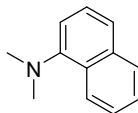

1k

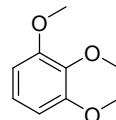

1l

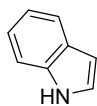

1m

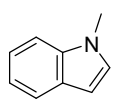

1n

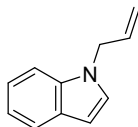

1o

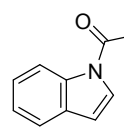

1p

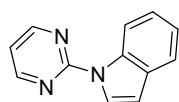

1q

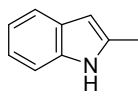

1r

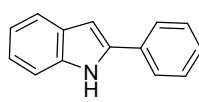

1s

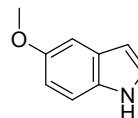

1t

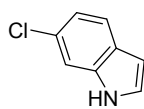

1u

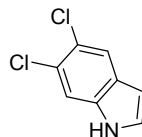

1v

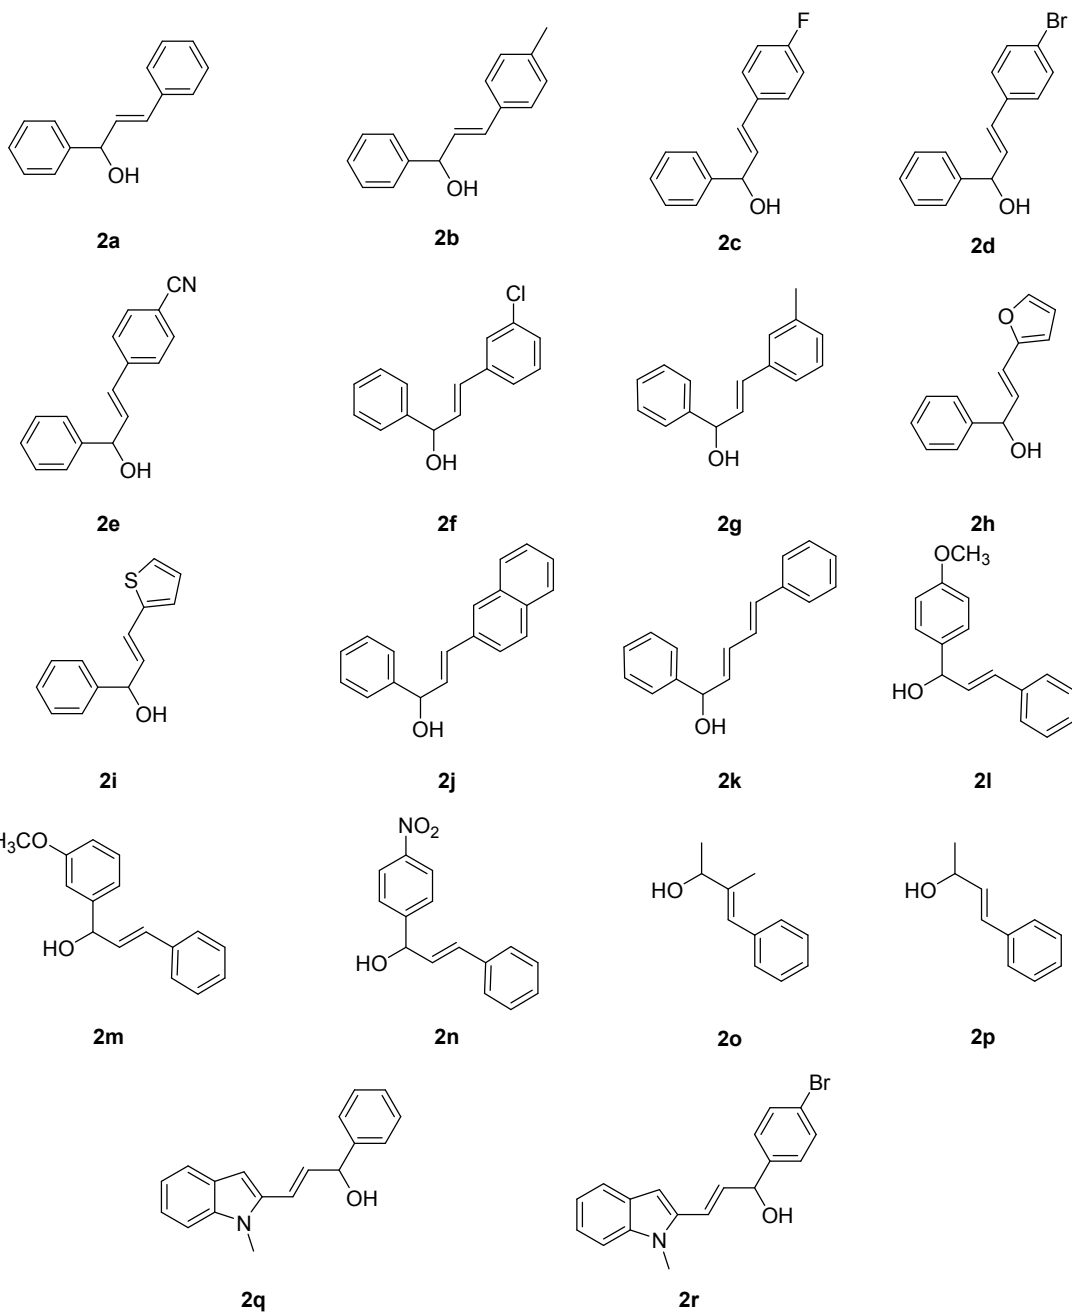

## 2. Substrate synthesis:

### (a) Synthesis of N-substituted aromatic amines 1b-1e, 1h-1k<sup>[1]</sup>

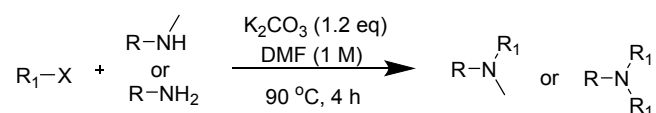

The experimental procedure for the synthesis of N-substituted aromatic amines (1b-1e, 1h-1k), please see: H. Shen, X. Zhang, Q. Liu, J. Pan, W. Hu, Y. Xiong and X. Zhu, Direct oxidative cyanation of tertiary amines promoted by in situ generated hypervalent iodine (III)-CN intermediate, *Tetrahedron Lett.*, 2015, **56**, 5628-5631.

### (b) Synthesis of N-cycloarylamines 1f-1g<sup>[2]</sup>

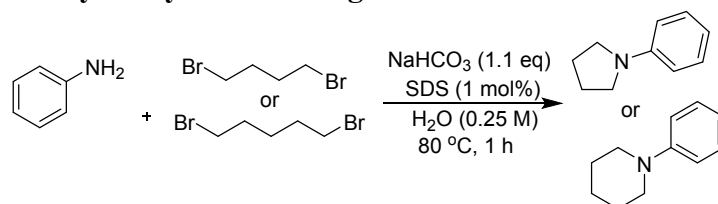

The experimental procedure for the synthesis of N-cycloarylamines (1f-1g), please see: X.-Z. Shu, Y.-F. Yang, Xiao-Feng Xia, K.-G. Ji, X.-Y. Liu and Y.-M. Liang, Platinum-catalyzed cross-dehydrogenative coupling reaction in the absence of oxidant, *Org. Biomol. Chem.*, 2010, **8**, 4077-4079.

### (c) Synthesis of compounds 1o<sup>[3]</sup>

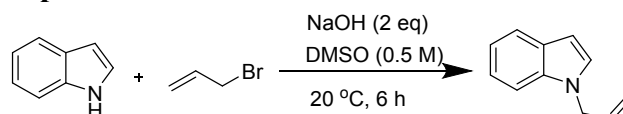

The experimental procedure for the synthesis of N-1-allyl-1H-indole (1o), please see: S. Olguín-Urbe, M. V. Mijangos, Y. A. Amador-Sánchez, M. A. Sánchez-Carmona and L. D. Miranda, Expedited Synthesis of Matrine Analogues through an Oxidative Cascade Addition/Double-Cyclization Radical Process, *Eur. J. Org. Chem.*, 2017, 2481-2485.

### (d) Synthesis of compounds 1p<sup>[4]</sup>

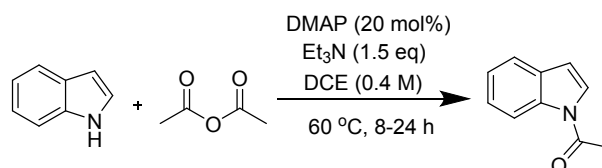

The experimental procedure for the synthesis of 1-(1H-indol-1-yl)ethan-1-one (1p), please see: Z.-L. Yan, W.-L. Chen, Y.-R. Gao, S. Mao, Y.-L. Zhang and Y.-Q. Wang, Palladium - Catalyzed Intermolecular C-2 Alkenylation of Indoles Using Oxygen as the Oxidant, *Adv. Synth. Catal.*, 2014, **356**, 1085-1092.

### (e) Synthesis of compounds 1q<sup>[5]</sup>

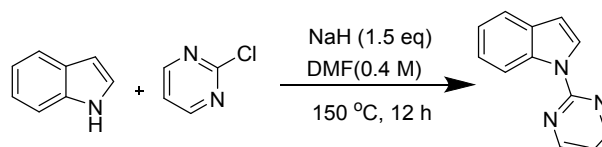

The experimental procedure for the synthesis of 1-(pyrimidin-2-yl)-1H-indole (1q), please see: M. Nishino, K. Hirano, T. Satoh and M. Miura, Copper-Mediated and Copper-Catalyzed Cross-Coupling of Indoles and 1,3-Azoles: Double C-H Activation, *Angew. Chem. Int. Ed.*, 2012, **51**, 6993-6997.

### (f) Synthesis of compounds 2a-2r<sup>[6], [7]</sup>

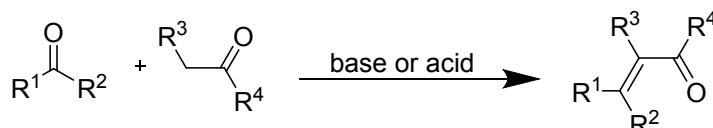

The experimental procedure for the synthesis of conjugated unsaturated ketones, please see: (a) B. Ding, Z. Zhang, Y. Liu, M. Sugiya and T. Imamoto, Chemoselective transfer hydrogenation of  $\alpha$ ,  $\beta$ -unsaturated ketones catalyzed by pincer-Pd complexes using alcohol as a hydrogen source, *Org. Lett.*, 2013, **15**, **14**, 3690-3693; (b) I. M. Ferreira, E. B. Meira, I. G. Rosset and A. L. M. Porto, Chemoselective biohydrogenation of  $\alpha$ ,  $\beta$ - and  $\alpha$ ,  $\beta$ ,  $\gamma$ ,  $\delta$ -unsaturated ketones by the marine-derived fungus *Penicillium citrinum* CBMAI 1186 in a biphasic system, *Journal of Molecular Catalysis B: Enzymatic*, 2015, **115**, 59-65. (c) A. Sultan, A. R. Raza, M. Abbas, K. M. Khan, M. N. Tahir and N. Saari, Evaluation of silica-H<sub>2</sub>SO<sub>4</sub> as an efficient heterogeneous catalyst for the synthesis of chalcones, *Molecules*, 2013, **18**, 10081-10094; (d) Z. Li, X. L. Chen, Y. J. Fu, W. Wang and M. Luo, A facile synthesis of trisubstituted alkenes from  $\beta$ -diketones and aldehydes with AlCl<sub>3</sub> as catalyst, *Res Chem Intermed.*, 2012, **38**, 25-35; (e) Y. H. He, Y. Hu and Z. Guan, Natural  $\alpha$ -amino acid L-lysine-catalyzed Knoevenagel condensations of  $\alpha$ ,  $\beta$ -unsaturated aldehydes and 1, 3-dicarbonyl compounds, *Synthetic Communications*, 2011, **41**, 1617-1628; (f) Y. Ma, J. Li, J. Ye, D. Liu and W. Zhang, Synthesis of chiral chromanols via a RuPHOX-Ru catalyzed asymmetric hydrogenation of chromones, *Chem. Commun.*, 2018, **54**, 13571-13574.

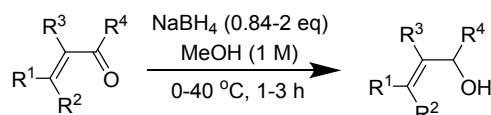

The experimental procedure for the synthesis of conjugated unsaturated ketones, please see: W. Gladkowski, A. Skrobiszewski, M. Mazur, M. Siepka, A. Pawlak, B. Obmińska-Mrukowicz, A. Bialonska, D. Poradowski, A. Drynda and M. Urbaniak, Synthesis and anticancer activity of novel halolactones with  $\beta$ -aryl substituents from simple aromatic aldehydes, *Tetrahedron*. 2013, **69**, 10414-10423.

### 3. Typical Procedure for Synthesis of 3:

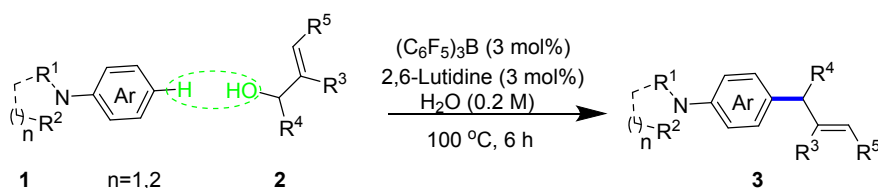

Add (C<sub>6</sub>F<sub>5</sub>)<sub>3</sub>B (4.6 mg, 0.009 mmol), 2,6-lutidine (1  $\mu$ L, 0.009 mmol) and allyl alcohol (0.3 mmol) to the reaction tube and disperse immediately with water (1.5 ml). Afterwards, **compound 1** (0.3 mmol) were added. The solution was heated to 100 °C. The solution was kept at 100 °C for 6 h. Then the solution was diluted with saturated brine. Ethyl acetate extracted and transferred to a round bottom flask. Silica gel was added to the flask and volatiles were evaporated under vacuum. The purification was performed by column chromatography on silica gel using ethyl acetate/petroleum ether as eluent to give **3**.

#### 4. Characterization of 3:

##### (E)-4-(1,3-diphenylallyl)-N,N-dimethylaniline (3a)<sup>[8]</sup>

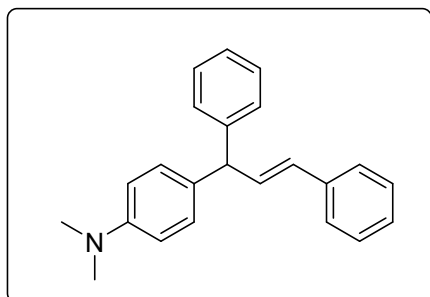

**3a**

White solid, m.p. 50-53°C, 87 mg, yield: 92%;  $R_f = 0.30$  (EtOAc/Petroleum ether 1:30).

$^1\text{H NMR}$  (400 MHz,  $\text{CDCl}_3$ ):  $\delta$  7.45 (d,  $J = 7.6$  Hz, 2H), 7.32 (dp,  $J = 29.0, 8.2$  Hz, 8H), 7.19 (d,  $J = 7.1$  Hz, 2H), 6.83-6.70 (m, 3H), 6.42 (d,  $J = 15.8$  Hz, 1H), 4.89 (d,  $J = 7.5$  Hz, 1H), 3.00 (s, 6H).

$^{13}\text{C NMR}$  (101 MHz,  $\text{CDCl}_3$ ):  $\delta$  149.29, 144.25, 137.53, 133.38, 131.48, 130.83, 129.32, 128.69, 128.53, 128.44, 127.18, 126.33, 126.26, 112.78, 53.31, 40.79.

##### (E)-4-(1,3-diphenylallyl)-N,N,2-trimethylaniline (3b)

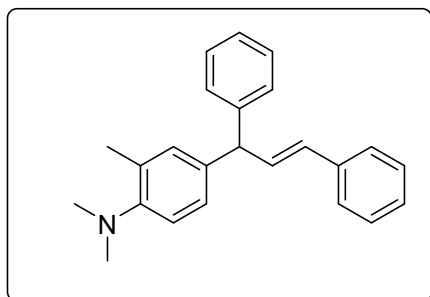

**3b**

Colorless oil, 69 mg, yield: 68%;  $R_f = 0.35$  (EtOAc/Petroleum ether 1:30).

$^1\text{H NMR}$  (400 MHz,  $\text{CDCl}_3$ ):  $\delta$  7.39 (dd,  $J = 7.1, 1.5$  Hz, 2H), 7.37-7.17 (m, 8H), 7.08-6.95 (m, 3H), 6.68 (dd,  $J = 15.8, 7.7$  Hz, 1H), 6.37 (d,  $J = 15.8$  Hz, 1H), 4.83 (d,  $J = 7.7$  Hz, 1H), 2.70 (s, 6H), 2.31 (s, 3H).

$^{13}\text{C NMR}$  (101 MHz,  $\text{CDCl}_3$ ):  $\delta$  143.91, 137.50, 137.44, 133.02, 132.08, 131.36, 131.00, 128.63, 128.48, 128.42, 127.20, 126.45, 126.31, 126.30, 118.34, 53.68, 44.31, 18.48.

HRMS (m/z): calcd for  $\text{C}_{24}\text{H}_{26}\text{N}$   $[\text{MH}]^+$ : 328.2060, found: 328.2056.

##### (E)-4-(1,3-diphenylallyl)-N,N,3-trimethylaniline (3c)

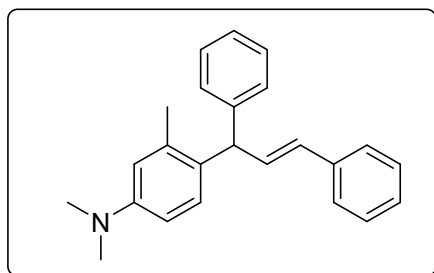

**3c**

Colorless oil, 37 mg, yield: 38%;  $R_f = 0.45$  (EtOAc/Petroleum ether 1:30).

$^1\text{H NMR}$  (400 MHz,  $\text{CDCl}_3$ ):  $\delta$  7.38 (d,  $J = 7.3$  Hz, 2H), 7.36-7.26 (m, 4H), 7.26-7.17 (m, 4H), 7.07 (d,  $J = 8.7$  Hz, 1H), 6.69 (dd,  $J = 15.9, 6.8$  Hz, 1H), 6.61 (d,  $J = 7.3$  Hz, 2H), 6.27-6.19 (m, 1H), 5.02 (d,  $J = 6.8$  Hz, 1H), 2.95 (s, 6H), 2.28 (s, 3H).

$^{13}\text{C NMR}$  (101 MHz,  $\text{CDCl}_3$ ):  $\delta$  149.27, 143.64, 137.62, 137.01, 133.33, 130.80, 129.88, 129.30, 128.87, 128.47, 128.29, 127.07, 126.27, 126.09, 114.97, 110.40, 49.71, 40.71, 20.31.

HRMS ( $m/z$ ): calcd for  $\text{C}_{24}\text{H}_{26}\text{N}$   $[\text{MH}]^+$ : 328.2060, found: 328.2063.

**(E)-4-(1,3-diphenylallyl)-N,N,2,6-tetramethylaniline (3d)**

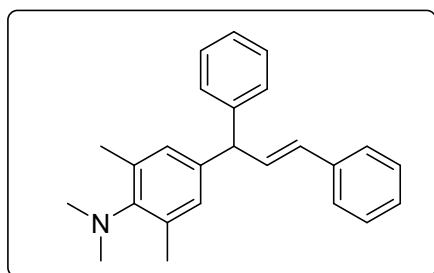

**3d**

Colorless oil, 61 mg, yield: 60%;  $R_f = 0.32$  (EtOAc/Petroleum ether 1:30).

$^1\text{H NMR}$  (400 MHz,  $\text{CDCl}_3$ ):  $\delta$  7.40-7.33 (m, 2H), 7.35-7.24 (m, 6H), 7.26-7.15 (m, 5H), 6.83 (s, 2H), 6.64 (dd,  $J = 15.8, 7.8$  Hz, 1H), 6.34 (d,  $J = 15.9$  Hz, 1H), 4.75 (d,  $J = 7.8$  Hz, 1H), 2.78 (s, 6H), 2.23 (s, 6H).

$^{13}\text{C NMR}$  (101 MHz,  $\text{CDCl}_3$ ):  $\delta$  143.84, 139.48, 137.42, 136.92, 132.96, 130.89, 128.76, 128.58, 128.45, 128.37, 127.16, 126.29, 126.25, 53.78, 42.51, 19.21.

HRMS ( $m/z$ ): calcd for  $\text{C}_{25}\text{H}_{28}\text{N}$   $[\text{MH}]^+$ : 342.2216, found: 342.2218.

**(E)-N-butyl-4-(1,3-diphenylallyl)-N-methylaniline (3e)**

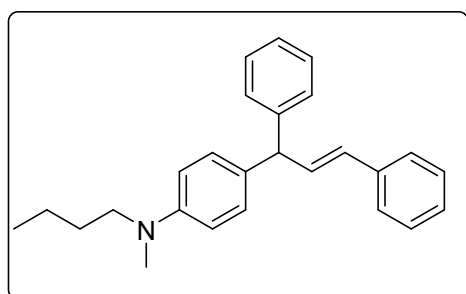

**3e**



Colorless oil, 70 mg, yield: 66%;  $R_f = 0.39$  (EtOAc/Petroleum ether 1:30).

**$^1\text{H NMR}$  (400 MHz,  $\text{CDCl}_3$ ):**  $\delta$  7.36 (d,  $J = 7.0$  Hz, 2H), 7.33-7.22 (m, 7H), 7.19 (tdd,  $J = 7.2, 4.7, 2.3$  Hz, 3H), 7.07 (d,  $J = 8.3$  Hz, 2H), 6.71-6.58 (m, 3H), 6.33 (d,  $J = 14.5$  Hz, 1H), 4.79 (d,  $J = 7.6$  Hz, 1H), 3.30-3.23 (m, 2H), 2.90 (s, 3H), 1.55-1.49 (m, 2H), 1.36-1.28 (m, 2H), 0.93 (t,  $J = 7.3$  Hz, 3H).

**$^{13}\text{C NMR}$  (101 MHz,  $\text{CDCl}_3$ ):**  $\delta$  137.54, 133.43, 130.69, 129.29, 128.61, 128.42, 128.32, 127.05, 126.25, 126.14, 112.10, 53.26, 52.64, 38.31, 28.87, 20.33, 13.96.

**HRMS (m/z):** calcd for  $\text{C}_{26}\text{H}_{30}\text{N}$   $[\text{MH}]^+$ : 356.2373, found: 356.2378.

### (E)-1-(4-(1,3-diphenylallyl)phenyl)piperidine (3f)

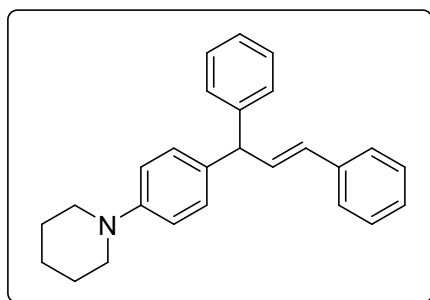

3f

Colorless oil, 100 mg, yield: 94%;  $R_f = 0.19$  (EtOAc/Petroleum ether 1:30).

**$^1\text{H NMR}$  (400 MHz,  $\text{CDCl}_3$ ):**  $\delta$  7.42 (d,  $J = 7.6$  Hz, 2H), 7.40-7.20 (m, 8H), 7.17 (d,  $J = 8.2$  Hz, 2H), 6.96 (d,  $J = 8.2$  Hz, 2H), 6.72 (dd,  $J = 15.9, 7.5$  Hz, 1H), 6.39 (d,  $J = 15.8$  Hz, 1H), 4.88 (d,  $J = 7.4$  Hz, 1H), 3.18 (t,  $J = 5.4$  Hz, 4H), 1.76 (p,  $J = 5.6$  Hz, 4H), 1.62 (q,  $J = 5.9$  Hz, 2H).

**$^{13}\text{C NMR}$  (101 MHz,  $\text{CDCl}_3$ ):**  $\delta$  150.74, 144.07, 137.50, 134.13, 133.21, 131.01, 129.27, 128.72, 128.54, 128.45, 127.22, 126.34, 126.32, 116.59, 53.42, 50.80, 25.95, 24.33.

**HRMS (m/z):** calcd for  $\text{C}_{26}\text{H}_{28}\text{N}$   $[\text{MH}]^+$ : 354.2216, found: 354.2217.

### (E)-1-(4-(1,3-diphenylallyl)phenyl)pyrrolidine (3g)

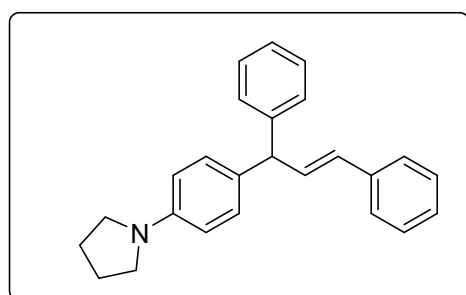

3g

Colorless oil, 85 mg, yield: 83%;  $R_f = 0.35$  (EtOAc/Petroleum ether 1:30)

**$^1\text{H NMR}$  (400 MHz,  $\text{CDCl}_3$ ):**  $\delta$  7.44-7.35 (m, 2H), 7.37-7.23 (m, 7H), 7.26-7.17 (m, 2H), 7.11 (d,  $J = 6.5$  Hz, 2H), 6.70 (dd,  $J = 15.8, 7.5$  Hz, 1H), 6.56 (d,  $J = 6.6$  Hz, 2H), 6.36 (d,  $J = 15.8$  Hz, 1H), 4.83 (d,  $J = 7.5$  Hz, 1H), 3.36-3.22 (m, 4H), 2.05-1.95 (m, 4H).

**<sup>13</sup>C NMR (101 MHz, CDCl<sub>3</sub>):** δ 146.59, 144.43, 137.61, 133.58, 130.70, 129.39, 128.65, 128.46, 128.34, 127.07, 126.29, 126.13, 111.70, 53.34, 47.70, 25.47.

**HRMS (m/z):** calcd for C<sub>25</sub>H<sub>26</sub>N [MH]<sup>+</sup>: 340.2060, found: 340.2057.

**(E)-N,N-dibenzyl-4-(1,3-diphenylallyl)aniline (3h)**

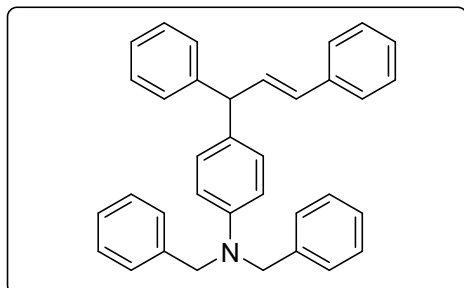

**3h**

Colorless oil, 129 mg, yield: 93%; R<sub>f</sub> = 0.32 (EtOAc/Petroleum ether 1:30).

**<sup>1</sup>H NMR (400 MHz, CDCl<sub>3</sub>):** δ 7.52-7.08 (m, 20H), 7.03 (d, *J* = 8.4 Hz, 2H), 6.75-6.59 (m, 3H), 6.33 (d, *J* = 15.8 Hz, 1H), 4.77 (d, *J* = 7.7 Hz, 1H), 4.63 (s, 4H).

**<sup>13</sup>C NMR (101 MHz, CDCl<sub>3</sub>):** δ 144.10, 137.48, 133.28, 130.73, 129.27, 129.20, 128.60, 128.44, 128.36, 127.10, 126.90, 126.26, 126.20, 54.47, 53.34.

**HRMS (m/z):** calcd for C<sub>35</sub>H<sub>32</sub>N [MH]<sup>+</sup>: 466.2529, found: 466.2533.

**(E)-N,N-diallyl-4-(1,3-diphenylallyl)aniline (3i)**

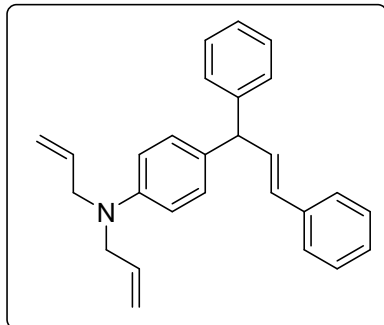

**3i**

Colorless oil, 91 mg, yield: 83%; R<sub>f</sub> = 0.51 (EtOAc/Petroleum ether 1:30).

**<sup>1</sup>H NMR (400 MHz, CDCl<sub>3</sub>):** δ 7.34 (d, *J* = 8.9 Hz, 2H), 7.32-7.20 (m, 6H), 7.16 (q, *J* = 7.1 Hz, 2H), 7.07-7.00 (m, 2H), 6.63 (q, *J* = 7.5 Hz, 3H), 6.32 (d, *J* = 14.6 Hz, 1H), 5.82 (ddd, *J* = 22.1, 10.1, 4.9 Hz, 2H), 5.20-5.08 (m, 4H), 4.76 (d, *J* = 7.6 Hz, 1H), 3.90-3.83 (m, 4H).

**<sup>13</sup>C NMR (101 MHz, CDCl<sub>3</sub>):** δ 147.36, 144.28, 137.60, 134.23, 133.46, 131.18, 130.77, 129.27, 128.70, 128.51, 128.42, 127.15, 126.34, 126.24, 116.09, 112.44, 53.38, 52.89.

**HRMS (m/z):** calcd for C<sub>27</sub>H<sub>28</sub>N [MH]<sup>+</sup>: 366.2216, found: 366.2217.

**(E)-4-(1,3-diphenylallyl)-N,N-di(prop-2-yn-1-yl)aniline (3j)**

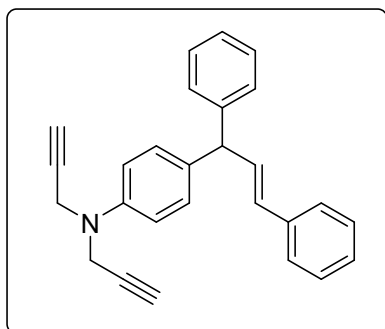

**3j**

Colorless oil, 92 mg, yield: 85%;  $R_f = 0.35$  (EtOAc/Petroleum ether 1:30).

**$^1\text{H NMR}$  (400 MHz,  $\text{CDCl}_3$ ):**  $\delta$  7.42 (d,  $J = 7.2$  Hz, 2H), 7.41-7.18 (m, 10H), 6.97 (d,  $J = 8.6$  Hz, 2H), 6.72 (dd,  $J = 15.8, 7.5$  Hz, 1H), 6.40 (d,  $J = 15.8$  Hz, 1H), 4.89 (d,  $J = 7.5$  Hz, 1H), 4.15 (d,  $J = 2.4$  Hz, 4H), 2.29 (t,  $J = 2.3$  Hz, 2H).

**$^{13}\text{C NMR}$  (101 MHz,  $\text{CDCl}_3$ ):**  $\delta$  146.33, 143.89, 137.44, 134.80, 133.04, 131.13, 129.42, 128.72, 128.57, 128.50, 127.29, 126.41, 126.36, 115.86, 79.37, 72.79, 53.42, 40.55.

**HRMS (m/z):** calcd for  $\text{C}_{27}\text{H}_{24}\text{N}$   $[\text{MH}]^+$ : 362.1903, found: 362.1901.

**(E)-4-(1,3-diphenylallyl)-N,N-dimethylnaphthalen-1-amine (3k)**

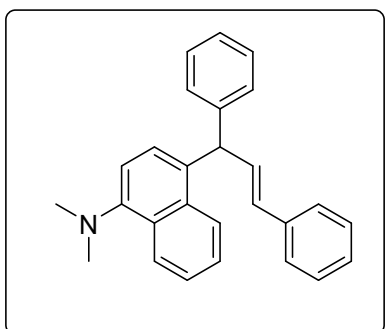

**3k**

Colorless oil, 96 mg, yield: 88%;  $R_f = 0.19$  (EtOAc/Petroleum ether 1:30).

**$^1\text{H NMR}$  (400 MHz,  $\text{CDCl}_3$ ):**  $\delta$  8.30 (d,  $J = 8.3$  Hz, 1H), 8.00 (d,  $J = 6.9$  Hz, 1H), 7.45-7.36 (m, 2H), 7.32 (d,  $J = 7.2$  Hz, 2H), 7.30-7.20 (m, 7H), 7.18 (dd,  $J = 10.1, 6.7$  Hz, 2H), 7.01 (d,  $J = 7.8$  Hz, 1H), 6.78 (dd,  $J = 15.9, 6.8$  Hz, 1H), 6.25 (d,  $J = 16.0$  Hz, 1H), 5.57 (d,  $J = 6.2$  Hz, 1H), 2.86 (s, 6H).

**$^{13}\text{C NMR}$  (101 MHz,  $\text{CDCl}_3$ ):**  $\delta$  143.45, 137.46, 133.84, 133.09, 132.95, 131.64, 129.36, 128.98, 128.55, 128.51, 127.29, 126.49, 126.45, 126.37, 125.95, 124.88, 124.82, 124.66, 113.62, 49.98, 45.41.

**HRMS (m/z):** calcd for  $\text{C}_{27}\text{H}_{26}\text{N}$   $[\text{MH}]^+$ : 364.2060, Found: 364.2065.

**(E)-(3-(2,3,4-trimethoxyphenyl)prop-1-ene-1,3-diyl)dibenzene (3l)**

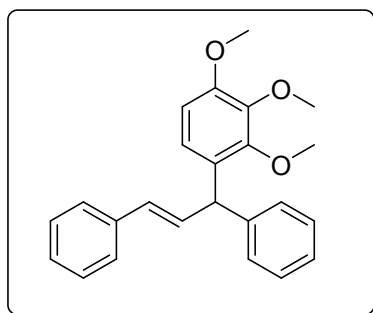

**31**

Colorless oil, 36 mg, yield: 33%;  $R_f = 0.26$  (EtOAc/Petroleum ether 1:30).

**$^1\text{H NMR}$  (400 MHz,  $\text{CDCl}_3$ ):**  $\delta$  7.36 (d,  $J = 7.0$  Hz, 2H), 7.32-7.15 (m, 8H), 6.87 (d,  $J = 8.6$  Hz, 1H), 6.71-6.61 (m, 2H), 6.28 (d,  $J = 14.4$  Hz, 1H), 5.21 (d,  $J = 8.9$  Hz, 1H), 3.87 (s, 3H), 3.84 (s, 3H), 3.64 (s, 3H).

**$^{13}\text{C NMR}$  (101 MHz,  $\text{CDCl}_3$ ):**  $\delta$  152.46, 151.66, 143.84, 142.46, 137.45, 132.76, 131.15, 129.83, 128.57, 128.46, 128.25, 127.15, 126.25, 126.15, 123.49, 107.07, 60.77, 60.67, 55.95, 47.27.

**HRMS (m/z):** calcd for  $\text{C}_{24}\text{H}_{25}\text{O}_3$   $[\text{MH}]^+$ : 361.1798, found: 361.1792.

**(E)-N,N-dimethyl-4-(1-phenyl-3-(p-tolyl)allyl)aniline(3m1) and (E)-N,N-dimethyl-4-(3-phenyl-1-(p-tolyl)allyl)aniline (3m2)**

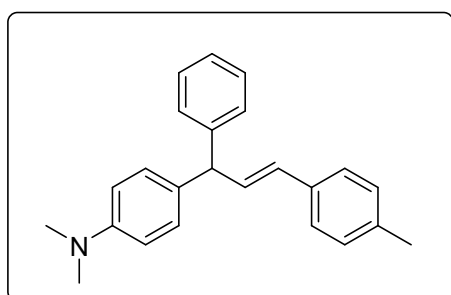

**3m1**

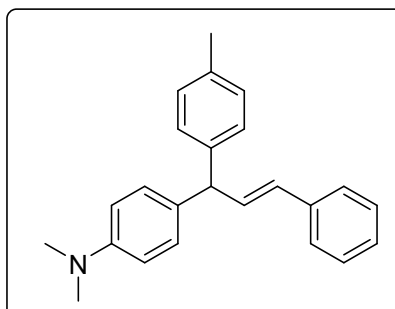

**3m2**

Colorless oil, 90 mg, yield: 92%; 3m1:3m2=1:1,  $R_f=0.21$  (EtOAc/Petroleum ether 1:30).

**$^1\text{H NMR}$  (400 MHz,  $\text{CDCl}_3$ ):**  $\delta$  7.44 (d,  $J = 8.5$  Hz, 1H), 7.41-7.12 (m, 10H), 6.81-6.65 (m, 3H), 6.39 (dd,  $J = 15.9, 10.6$  Hz, 1H), 4.86 (t,  $J = 7.9$  Hz, 1H), 2.98 (d,  $J = 1.6$  Hz, 6H), 2.39 (d,  $J = 4.1$  Hz, 3H).

**$^{13}\text{C NMR}$  (101 MHz,  $\text{CDCl}_3$ ):**  $\delta$  149.17, 133.59, 132.38, 130.74, 130.70, 129.36, 129.31, 129.24, 129.16, 128.71, 128.57, 128.52, 128.42, 127.14, 126.34, 126.25, 126.23, 112.97, 112.94, 53.35, 52.97, 40.89, 40.88, 21.24, 21.11.

**HRMS (m/z):** calcd for  $\text{C}_{24}\text{H}_{26}\text{N}$   $[\text{MH}]^+$ : 328.2060, found: 328.2063.

**(E)-4-(3-(4-fluorophenyl)-1-phenylallyl)-N,N-dimethylaniline (3n1)**

**and (E)-4-(1-(4-fluorophenyl)-3-phenylallyl)-N,N-**

**dimethylaniline(3n2)**

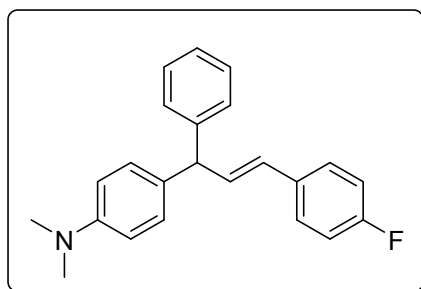

**3n1**

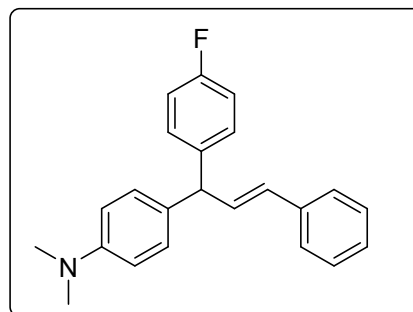

**3n2**

Colorless oil, 85 mg, yield: 86%; 3n1:3n2=1:1,  $R_f$ =0.39 (EtOAc/Petroleum ether 1:20).

**$^1\text{H NMR}$  (400 MHz,  $\text{CDCl}_3$ ):**  $\delta$  7.36-7.11 (m, 7H), 7.09-7.01 (m, 2H), 6.99-6.87 (m, 2H), 6.67 (d,  $J$  = 6.7 Hz, 2H), 6.63-6.50 (m, 1H), 6.26 (dd,  $J$  = 15.8, 8.4 Hz, 1H), 4.75 (d,  $J$  = 8.6 Hz, 1H), 2.87 (d,  $J$  = 1.9 Hz, 6H).

**$^{13}\text{C NMR}$  (101 MHz,  $\text{CDCl}_3$ ):**  $\delta$  149.30, 133.19, 133.17, 131.46, 130.99, 130.10, 130.02, 129.66, 129.28, 129.23, 128.63, 128.54, 128.44, 127.79, 127.71, 127.27, 126.32, 126.29, 115.45, 115.24, 115.03, 112.83, 53.28, 52.52, 40.75, 40.72.

**HRMS (m/z):** calcd for  $\text{C}_{23}\text{H}_{23}\text{FN}$   $[\text{MH}]^+$ : 332.1809, Found: 332.1807.

**(E)-4-(3-(4-bromophenyl)-1-phenylallyl)-N,N-dimethylaniline (3o1)**

**and (E)-4-(1-(4-bromophenyl)-3-phenylallyl)-N,N-**

**dimethylaniline(3o2)**

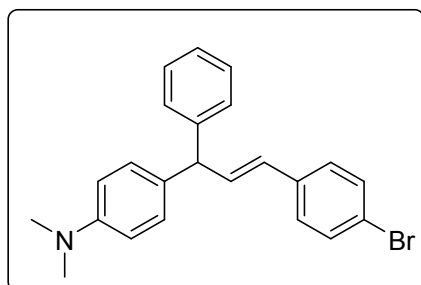

**3o1**

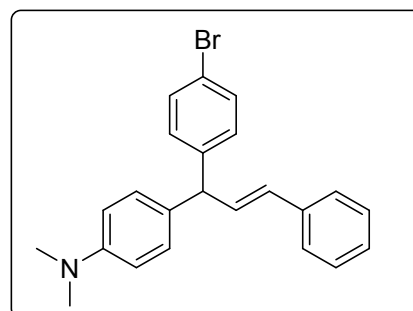

**3o2**

Colorless oil, 99 mg, yield: 85%; 3o1:3o2=1:1,  $R_f$ =0.29 (EtOAc/Petroleum ether 1:30).

**$^1\text{H NMR}$  (400 MHz,  $\text{CDCl}_3$ ):**  $\delta$  7.39 (dd,  $J$  = 13.7, 8.1 Hz, 3H), 7.31 (q,  $J$  = 7.4 Hz, 3H), 7.24 (dd,  $J$  = 8.4, 6.3 Hz, 3H), 7.16-7.02 (m, 3H), 6.74 (dd,  $J$  = 8.8, 3.2 Hz, 2H), 6.65 (ddd,  $J$  = 20.1, 15.8, 7.4 Hz, 1H), 6.31 (dd,  $J$  = 21.0, 15.8 Hz, 1H), 4.80 (dd,  $J$  = 13.3, 7.4 Hz, 1H), 2.94 (d,  $J$  = 1.2 Hz, 6H).

**$^{13}\text{C NMR}$  (101 MHz,  $\text{CDCl}_3$ ):**  $\delta$  134.22, 132.64, 131.54, 131.43, 131.23, 130.41, 129.70, 129.27, 129.22, 128.59, 128.53, 128.44, 127.84, 127.31, 126.33, 126.31, 53.28, 52.69, 40.82, 40.77.

**HRMS (m/z):** calcd for  $\text{C}_{23}\text{H}_{23}\text{BrN}$   $[\text{MH}]^+$ : 392.1008, Found: 392.1011.

**(E)-4-(3-(4-(dimethylamino)phenyl)-3-phenylprop-1-en-1-**

yl)benzointrile (3p1) and (E)-4-(1-(4-(dimethylamino)phenyl)-3-phenylallyl)benzointrile (3p2)

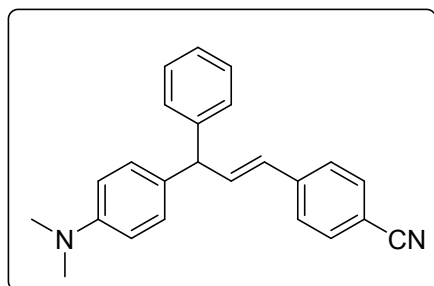

3p1

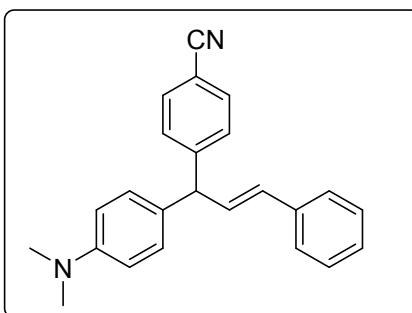

3p2

Colorless oil, 77 mg, yield: 76%; 3p1:3p2=5:2,  $R_f=0.1$  (EtOAc/Petroleum ether 1:20).

$^1\text{H NMR}$  (400 MHz,  $\text{CDCl}_3$ ):  $\delta$  7.60-7.54 (m, 2H), 7.44-7.20 (m, 7H), 7.07 (t,  $J = 9.0$  Hz, 2H), 6.84-6.78 (m, 1H), 6.71 (d,  $J = 8.8$  Hz, 2H), 6.33 (dt,  $J = 15.9, 1.8$  Hz, 1H), 4.84 (dd,  $J = 7.6, 4.1$  Hz, 1H), 2.94 (d,  $J = 2.7$  Hz, 6H).

$^{13}\text{C NMR}$  (101 MHz,  $\text{CDCl}_3$ ):  $\delta$  149.95, 149.40, 143.40, 142.02, 137.57, 136.98, 132.32, 132.21, 132.07, 131.86, 131.67, 130.50, 129.75, 129.39, 129.34, 129.22, 129.19, 128.63, 128.57, 128.55, 128.52, 128.13, 127.52, 126.74, 126.49, 126.44, 126.32, 119.06, 112.77, 110.29, 110.05, 53.33, 53.28, 40.64, 40.58.

HRMS (m/z): calcd for  $\text{C}_{24}\text{H}_{23}\text{N}_2$   $[\text{MH}]^+$ : 339.1856, Found:339.1860.

(E)-4-(3-(3-chlorophenyl)-1-phenylallyl)-N,N-dimethylaniline (3q1)

and (E)-4-(1-(3-chlorophenyl)-3-phenylallyl)-N,N-dimethylaniline(3q2)

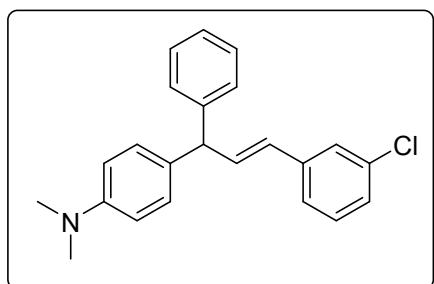

3q1

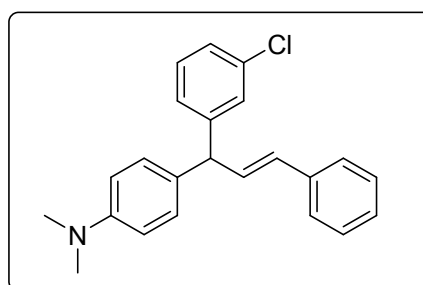

3q2

Colorless oil, 79 mg, yield: 76%; 3q1:3q2=1:1,  $R_f=0.39$  (EtOAc/Petroleum ether 1:20).

$^1\text{H NMR}$  (400 MHz,  $\text{CDCl}_3$ ):  $\delta$  7.34-6.99 (m, 11H), 6.65 (d,  $J = 8.6$  Hz, 2H), 6.63-6.51 (m, 1H), 6.24 (dd,  $J = 27.4, 15.8$  Hz, 1H), 4.73 (dd,  $J = 12.5, 7.5$  Hz, 1H), 2.86 (d,  $J = 2.2$  Hz, 6H).

$^{13}\text{C NMR}$  (101 MHz,  $\text{CDCl}_3$ ):  $\delta$  134.99, 132.48, 131.34, 129.69, 129.62, 129.56, 129.26, 129.23, 128.70, 128.61, 128.53, 128.46, 127.33, 127.05, 126.87, 126.43,

126.35, 126.20, 124.53, 112.85, 53.25, 53.02, 40.75, 40.70.

**HRMS (m/z):** calcd for C<sub>23</sub>H<sub>23</sub>ClN [MH]<sup>+</sup>: 348.1514, Found: 348.1511.

**(E)-N,N-dimethyl-4-(1-phenyl-3-(m-tolyl)allyl)aniline (3r1) and (E)-N,N-dimethyl-4-(3-phenyl-1-(m-tolyl)allyl)aniline (3r2)**

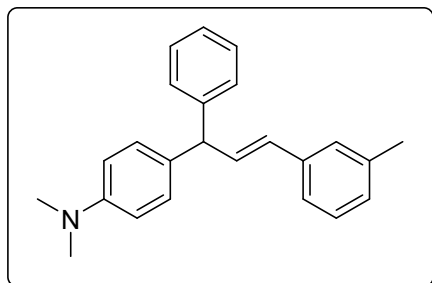

**3r1**

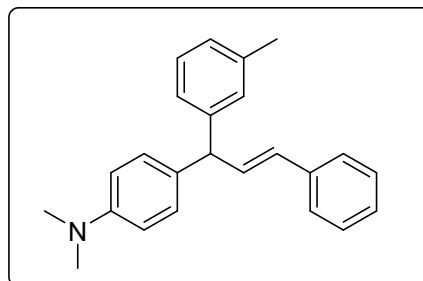

**3r2**

Colorless oil, 77 mg, yield: 78%; 3ab1:3ab2=3:2, R<sub>f</sub>=0.22 (EtOAc/Petroleum ether 1:30).

**<sup>1</sup>H NMR (400 MHz, CDCl<sub>3</sub>):** δ 7.39 (d, *J* = 7.4 Hz, 1H), 7.36-7.00 (m, 10H), 6.73 (d, *J* = 8.4 Hz, 2H), 6.67 (ddd, *J* = 12.2, 7.5, 3.8 Hz, 1H), 6.34 (dd, *J* = 15.6, 12.7 Hz, 1H), 4.81 (dd, *J* = 13.8, 7.5 Hz, 1H), 2.94 (s, 6H), 2.34 (s, 3H).

**<sup>13</sup>C NMR (101 MHz, CDCl<sub>3</sub>):** δ 133.47, 133.16, 130.89, 130.69, 129.34, 129.28, 129.25, 128.65, 128.45, 128.37, 128.36, 128.26, 127.91, 127.08, 126.99, 126.30, 126.17, 125.68, 123.46, 112.85, 53.30, 40.78, 21.51, 21.38.

**HRMS (m/z):** calcd for C<sub>24</sub>H<sub>26</sub>N [MH]<sup>+</sup>: 328.2060, found: 328.2065.

**(E)-4-(3-(furan-2-yl)-1-phenylallyl)-N,N-dimethylaniline (3s1) and (E)-4-(1-(furan-2-yl)-3-phenylallyl)-N,N-dimethylaniline (3s2)**

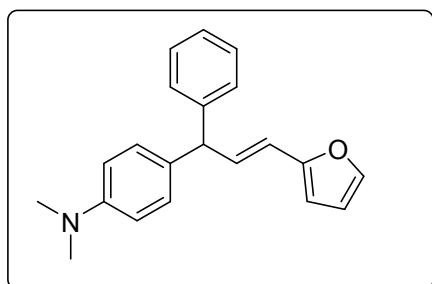

**3s1**

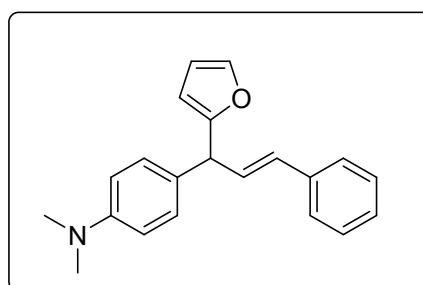

**3s2**

Colorless oil, 64 mg, yield: 70%; 3s1:3s2=1:1, R<sub>f</sub>=0.47 (EtOAc/Petroleum ether 1:20).

**<sup>1</sup>H NMR (400 MHz, CDCl<sub>3</sub>):** δ 7.40-7.10 (m, 8H), 6.85 (s, 2H), 6.60 (ddd, *J* = 26.9, 15.8, 6.8 Hz, 1H), 6.44-6.06 (m, 3H), 4.82 (dd, *J* = 14.4, 7.3 Hz, 1H), 2.96 (d, *J* = 1.6 Hz, 6H).

**<sup>13</sup>C NMR (101 MHz, CDCl<sub>3</sub>):** δ 152.96, 141.71, 141.55, 137.19, 131.15, 130.26, 129.49, 129.04, 128.61, 128.47, 128.43, 128.26, 127.33, 126.37, 126.34, 119.74, 111.19, 110.11, 107.13, 106.51, 53.08, 47.50.

**HRMS (m/z):** calcd for C<sub>21</sub>H<sub>22</sub>NO [MH]<sup>+</sup>: 304.1696, found: 304.1698.

**(E)-N,N-dimethyl-4-(1-phenyl-3-(thiophen-2-yl)allyl)aniline (3t1) and**

**(E)-N,N-dimethyl-4-(3-phenyl-1-(thiophen-2-yl)allyl)aniline (3t2)**

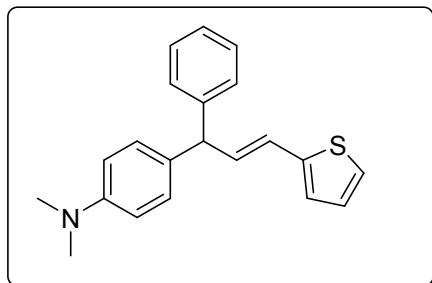

**3t1**

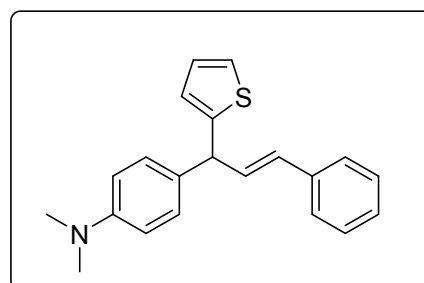

**3t2**

Colorless oil, 64 mg, yield: 67%; 3t1:3t2=1:1, R<sub>f</sub>=0.27 (EtOAc/Petroleum ether 1:30).

**<sup>1</sup>H NMR (400 MHz, CDCl<sub>3</sub>):** δ 7.42 (d, *J* = 7.7 Hz, 1H), 7.34 (q, *J* = 7.3 Hz, 2H), 7.30 – 7.12 (m, 5H), 7.02 – 6.87 (m, 2H), 6.79 – 6.73 (m, 2H), 6.72-6.54 (dd, *J* = 15.6, 7.0 Hz, 1H), 6.50-6.44 (dd, *J* = 15.8, 10.3 Hz, 1H), 5.04-4.82 (d, *J* = 6.9 Hz, 1H), 2.97 (s, 6H).

**<sup>13</sup>C NMR (101 MHz, CDCl<sub>3</sub>):** δ 149.58, 149.31, 148.74, 143.93, 142.78, 137.29, 133.31, 132.72, 131.17, 130.63, 129.35, 128.91, 128.70, 128.53, 128.45, 127.33, 127.30, 126.74, 126.45, 126.32, 125.04, 124.85, 124.24, 124.16, 123.62, 112.80, 112.76, 53.10, 48.91, 40.76, 40.72.

**HRMS (m/z):** calcd for C<sub>21</sub>H<sub>22</sub>NS [MH]<sup>+</sup>: 320.1467, Found:320.1470.

**(E)-N,N-dimethyl-4-(3-(naphthalen-2-yl)-1-phenylallyl)aniline (3u1)**

**and (E)-N,N-dimethyl-4-(1-(naphthalen-2-yl)-3-phenylallyl)aniline**

**(3u2)**

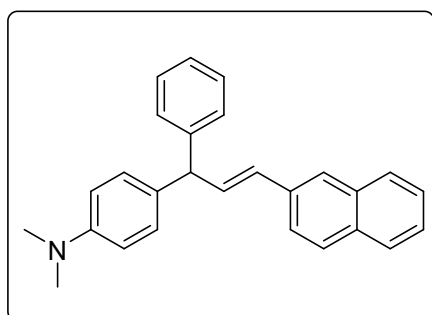

**3u1**

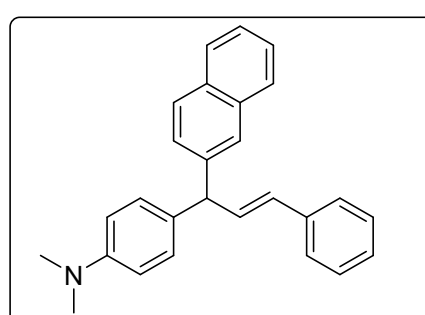

**3u2**

Colorless oil, 95 mg, yield: 87%; 3u1:3u2=1:1, R<sub>f</sub>=0.18 (EtOAc/Petroleum ether 1:30).

**<sup>1</sup>H NMR (400 MHz, CDCl<sub>3</sub>):** δ 7.84 (q, *J* = 10.2, 7.8 Hz, 3H), 7.76-7.68 (m, 1H), 7.55-7.19 (m, 10H), 6.93-6.76 (m, 3H), 6.57-6.46 (d, *J* = 15.8 Hz, 1H), 5.06 (d, *J* =



7.4 Hz, 1H), 2.99 (d,  $J = 1.8$  Hz, 6H).

$^{13}\text{C}$  NMR (101 MHz,  $\text{CDCl}_3$ ):  $\delta$  149.27, 144.26, 141.79, 137.56, 135.05, 133.90, 133.73, 133.69, 133.64, 133.22, 132.88, 132.30, 131.73, 131.54, 131.19, 131.04, 129.51, 129.42, 128.76, 128.59, 128.51, 128.35, 128.14, 128.05, 127.96, 127.90, 127.71, 127.67, 127.60, 127.27, 126.78, 126.41, 126.35, 126.23, 126.03, 126.01, 125.68, 125.54, 123.81, 112.98, 112.96, 53.49, 53.44, 40.87, 40.85.

HRMS ( $m/z$ ): calcd for  $\text{C}_{27}\text{H}_{26}\text{N}$   $[\text{MH}]^+$ : 364.2060, Found: 364.2062.

**4-((2E,4E)-1,5-diphenylpenta-2,4-dien-1-yl)-N,N-dimethylaniline (3v1)**

**and 4-((1E,4E)-1,5-diphenylpenta-1,4-dien-3-yl)-N,N-dimethylaniline**

**(3v2)**

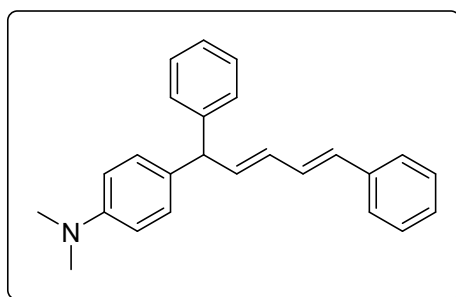

**3v1**

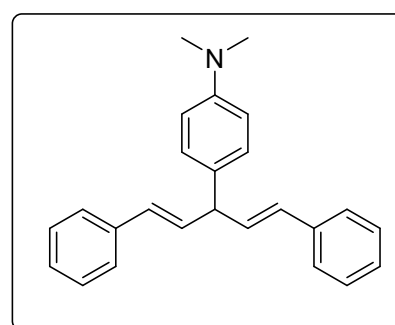

**3v2**

Colorless oil, 83 mg, yield: 81%; 3v1:3v2=3:1,  $R_f=0.25$  (EtOAc/Petroleum ether 1:30).

$^1\text{H}$  NMR (400 MHz,  $\text{CDCl}_3$ ):  $\delta$  7.47-7.23 (m, 10H), 7.23-7.09 (m, 2H), 6.95-6.72 (m, 3H), 6.53-6.15 (m, 3H), 4.80-4.36 (d,  $J = 7.4$  Hz, 1H), 2.97 (d,  $J = 5.1$  Hz, 6H).

$^{13}\text{C}$  NMR (101 MHz,  $\text{CDCl}_3$ ):  $\delta$  144.14, 137.80, 137.55, 137.53, 132.57, 131.53, 131.33, 130.27, 129.30, 129.07, 128.85, 128.62, 128.60, 128.54, 128.42, 128.32, 127.89, 127.30, 127.19, 126.31, 126.25, 113.07, 53.25, 50.74, 40.94.

**(E)-4-(1-(4-methoxyphenyl)-3-phenylallyl)-N,N-dimethylaniline (3w1)**

**and (E)-4-(3-(4-methoxyphenyl)-1-phenylallyl)-N,N-dimethylaniline**

**(3w2)**

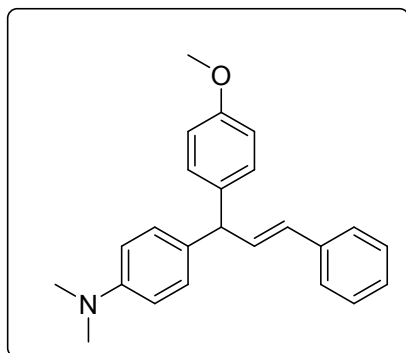

**3w1**

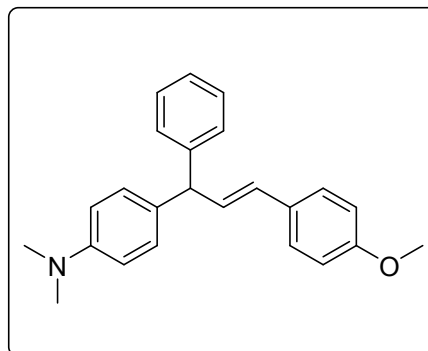

**3w2**

Colorless oil, 82 mg, yield: 80%; 3w1:3w2=1:1,  $R_f=0.09$  (EtOAc/Petroleum ether 1:30).

**$^1\text{H NMR}$  (400 MHz,  $\text{CDCl}_3$ ):**  $\delta$  7.47-7.28 (m, 5H), 7.29-7.18 (m, 2H), 7.16 (d,  $J = 8.2$  Hz, 2H), 6.89 (t,  $J = 8.8$  Hz, 2H), 6.77 (d,  $J = 8.3$  Hz, 2H), 6.72-6.55 (m, 1H), 6.36 (t,  $J = 15.4$  Hz, 1H), 4.84 (t,  $J = 8.1$  Hz, 1H), 3.83 (s, 3H), 2.97 (s, 6H).

**$^{13}\text{C NMR}$  (101 MHz,  $\text{CDCl}_3$ ):**  $\delta$  149.16, 133.70, 131.26, 130.62, 130.25, 129.61, 129.33, 129.27, 128.68, 128.52, 128.40, 127.45, 127.14, 126.32, 126.20, 113.94, 113.82, 112.94, 55.32, 55.30, 53.33, 52.49, 40.87.

**HRMS (m/z):** calcd for  $\text{C}_{24}\text{H}_{26}\text{NO}$   $[\text{MH}]^+$ : 344.2009, Found: 344.2012.

**(E)-4-(1-(3-methoxyphenyl)-3-phenylallyl)-N,N-dimethylaniline (3x1)**

**(E)-4-(3-(3-methoxyphenyl)-1-phenylallyl)-N,N-dimethylaniline (3x2)**

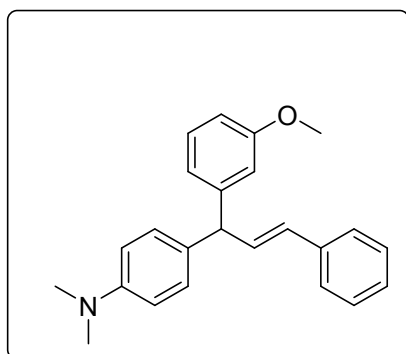

**3x1**

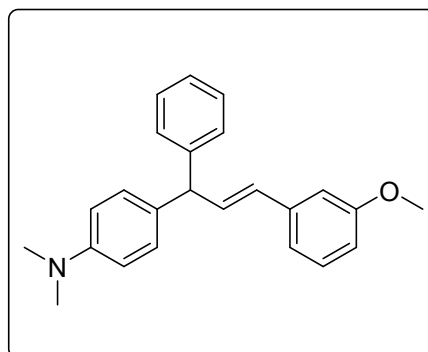

**3x2**

Colorless oil, 77 mg, yield: 75%; 3x1:3x2=1:1,  $R_f=0.27$  (EtOAc/Petroleum ether 1:30).

**$^1\text{H NMR}$  (400 MHz,  $\text{CDCl}_3$ ):**  $\delta$  7.38 (d,  $J = 7.1$  Hz, 1H), 7.36-7.17 (m, 5H), 7.12 (dd,  $J = 8.9, 2.7$  Hz, 2H), 7.01-6.90 (m, 1H), 6.90-6.80 (m, 1H), 6.80-6.61 (m, 4H), 6.34 (t,  $J = 15.4$  Hz, 1H), 4.81 (dd,  $J = 12.5, 7.5$  Hz, 1H), 3.80-3.78 (s, 3H), 2.94 (s, 6H).

**$^{13}\text{C NMR}$  (101 MHz,  $\text{CDCl}_3$ ):**  $\delta$  159.79, 159.67, 149.22, 145.89, 144.14, 139.00, 137.52, 133.68, 133.14, 130.85, 130.74, 129.42, 129.30, 129.29, 129.23, 128.64, 128.45, 128.38, 127.12, 126.30, 126.22, 121.12, 118.98, 114.63, 112.95, 111.48, 111.32, 55.21, 55.16, 53.32, 53.25, 40.77.

**HRMS (m/z):** calcd for C<sub>24</sub>H<sub>26</sub>NO [MH]<sup>+</sup>: 344.2009, found: 344.2013.

**(E)-N,N-dimethyl-4-(1-(4-nitrophenyl)-3-phenylallyl)aniline (3y1)**

**and (E)-N,N-dimethyl-4-(3-(4-nitrophenyl)-1-phenylallyl)aniline (3y2)**

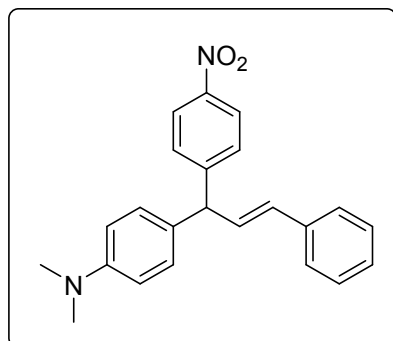

**3y1**

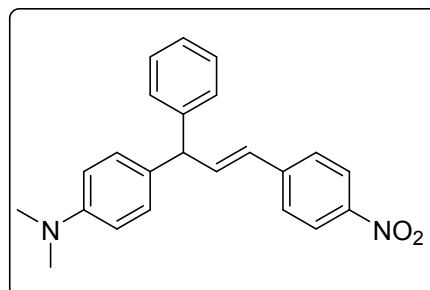

**3y2**

Colorless oil, 78 mg, yield: 72%; 3y1:3y2=2:3, R<sub>f</sub>=0.28 (EtOAc/Petroleum ether 1:15).

**<sup>1</sup>H NMR (400 MHz, CDCl<sub>3</sub>):** δ 8.15 (dd, *J* = 8.6, 4.5 Hz, 2H), 7.48 (d, *J* = 8.4 Hz, 1H), 7.42-7.29 (m, 4H), 7.24 (d, *J* = 7.3 Hz, 2H), 7.09 (t, *J* = 8.3 Hz, 2H), 6.72 (d, *J* = 8.2 Hz, 2H), 6.62 (dd, *J* = 15.9, 7.4 Hz, 1H), 6.37 (t, *J* = 16.7 Hz, 1H), 4.91 (d, *J* = 7.4 Hz, 1H), 2.94 (d, *J* = 1.9 Hz, 6H).

**<sup>13</sup>C NMR (101 MHz, CDCl<sub>3</sub>):** δ 152.08, 149.57, 149.43, 146.61, 146.46, 144.04, 143.27, 138.56, 136.91, 131.97, 131.53, 130.33, 129.62, 129.42, 129.24, 129.19, 128.98, 128.59, 128.56, 127.58, 126.74, 126.55, 126.34, 123.94, 123.66, 112.78, 112.77, 53.41, 53.10, 40.65, 40.59.

**HRMS (m/z):** calcd for C<sub>23</sub>H<sub>23</sub>N<sub>2</sub>O<sub>2</sub> [MH]<sup>+</sup>: 359.1754, Found: 359.1758.

**(E)-N,N-dimethyl-4-(3-methyl-4-phenylbut-3-en-2-yl)aniline (3z)**

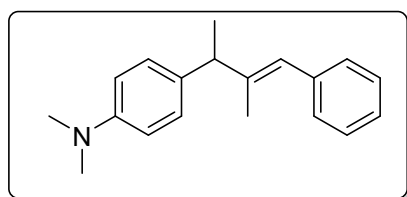

**3z**

Yellow oil, 40 mg, yield: 51%; R<sub>f</sub>=0.34 (EtOAc/Petroleum ether 1:30).

**<sup>1</sup>H NMR (400 MHz, CDCl<sub>3</sub>):** δ 7.36-7.23 (m, 4H), 7.22-7.09 (m, 3H), 6.72 (d, *J* = 8.7 Hz, 2H), 6.46 (s, 1H), 3.50 (q, *J* = 7.1 Hz, 1H), 2.93 (s, 6H), 1.72 (d, *J* = 1.3 Hz, 3H), 1.45 (d, *J* = 7.1 Hz, 3H).

**<sup>13</sup>C NMR (101 MHz, CDCl<sub>3</sub>):** δ 143.06, 138.74, 129.93, 129.29, 128.98, 128.13, 127.97, 127.96, 125.81, 124.09, 112.81, 47.51, 40.84, 19.64, 16.40.

**HRMS (m/z):** calcd for C<sub>19</sub>H<sub>24</sub>N [MH]<sup>+</sup>: 266.1903, found: 266.1905.

**(E)-N,N-dimethyl-4-(4-phenylbut-3-en-2-yl)aniline (3aa)<sup>[9]</sup>**

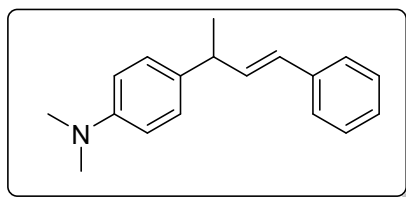

**3aa**

Yellow oil, 43 mg, yield: 57%;  $R_f=0.31$  (EtOAc/Petroleum ether 1:30).

**$^1\text{H}$  NMR (400 MHz,  $\text{CDCl}_3$ ):**  $\delta$  7.35 (dd,  $J = 8.3, 1.3$  Hz, 2H), 7.32-7.23 (m, 2H), 7.22-7.12 (m, 3H), 6.74 (d,  $J = 8.7$  Hz, 2H), 6.41-6.35 (m, 2H), 3.57 (dt,  $J = 7.2, 3.8$  Hz, 1H), 2.93 (s, 6H), 1.44 (d,  $J = 7.0$  Hz, 3H).

**$^{13}\text{C}$  NMR (101 MHz,  $\text{CDCl}_3$ ):**  $\delta$  137.81, 136.05, 129.05, 128.44, 128.42, 128.20, 127.88, 126.83, 126.10, 113.04, 41.54, 40.88, 21.23.

**(E)-3-(1,3-diphenylallyl)-1H-indole (3ab)<sup>[10]</sup>**

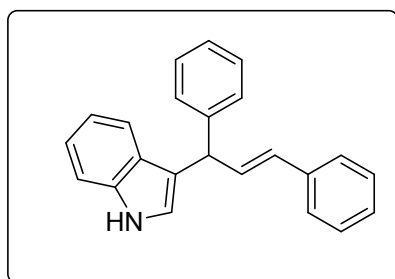

**3ab**

Yellow solid, m.p. 109-111°C, 79 mg, yield: 86%;  $R_f = 0.13$  (EtOAc/Petroleum ether 1:20).

**$^1\text{H}$  NMR (400 MHz,  $\text{CDCl}_3$ ):**  $\delta$  7.85 (s, 1H), 7.54 (d,  $J = 8.0$  Hz, 1H), 7.49-7.22 (m, 12H), 7.13 (t,  $J = 7.5$  Hz, 1H), 6.89 (d,  $J = 2.4$  Hz, 1H), 6.82 (dd,  $J = 15.8, 7.4$  Hz, 1H), 6.54 (d,  $J = 15.8$  Hz, 1H), 5.21 (d,  $J = 7.4$  Hz, 1H).

**$^{13}\text{C}$  NMR (101 MHz,  $\text{CDCl}_3$ ):**  $\delta$  143.50, 137.59, 136.72, 132.67, 130.64, 128.62, 128.61, 128.55, 127.29, 126.88, 126.51, 126.44, 122.76, 122.18, 119.97, 119.53, 118.66, 111.27, 46.30.

**(E)-3-(1,3-diphenylallyl)-1-methyl-1H-indole (3ac)<sup>[10]</sup>**

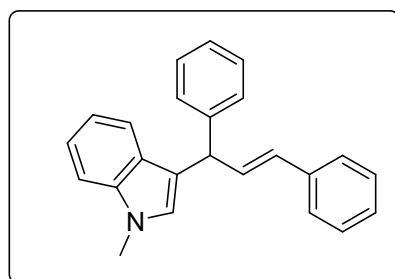

**3ac**

White solid, m.p. 116-117°C, 90 mg, yield: 93%;  $R_f = 0.31$  (EtOAc/Petroleum ether 1:20).

**<sup>1</sup>H NMR (400 MHz, CDCl<sub>3</sub>):** δ 7.57 (d, *J* = 8.0 Hz, 1H), 7.52-7.29 (m, 12H), 7.16 (t, *J* = 7.5 Hz, 1H), 6.87 (q, *J* = 9.2, 7.9 Hz, 2H), 6.58 (d, *J* = 15.8 Hz, 1H), 5.25 (d, *J* = 7.4 Hz, 1H), 3.79 (s, 3H).

**<sup>13</sup>C NMR (101 MHz, CDCl<sub>3</sub>):** δ 143.69, 137.64, 137.53, 132.85, 130.56, 128.63, 128.56, 127.51, 127.35, 127.28, 126.50, 126.45, 121.78, 120.09, 119.03, 117.17, 109.34, 46.31, 32.77.

### (E)-1-allyl-3-(1,3-diphenylallyl)-1H-indole (3ad)

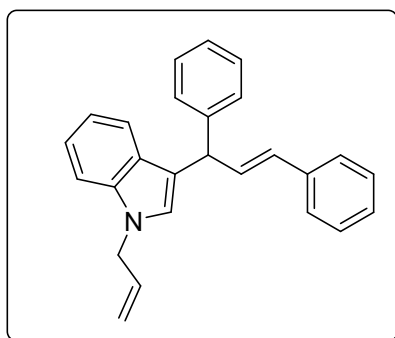

**3ad**

Yellow solid, m.p. 49-50°C, 90 mg, yield: 87%; *R<sub>f</sub>* = 0.56 (EtOAc/Petroleum ether 1:15).

**<sup>1</sup>H NMR (400 MHz, CDCl<sub>3</sub>):** δ 7.49 -7.07 (m, 13H), 7.00 (t, *J* = 7.5 Hz, 1H), 6.80 (s, 1H), 6.71 (dd, *J* = 15.8, 7.4 Hz, 1H), 6.43 (d, *J* = 15.8 Hz, 1H), 5.96 (ddd, *J* = 22.4, 10.5, 5.4 Hz, 1H), 5.20-5.02 (m, 3H), 4.66 (dt, *J* = 5.4, 1.7 Hz, 2H).

**<sup>13</sup>C NMR (101 MHz, CDCl<sub>3</sub>):** δ 143.49, 137.54, 136.86, 133.58, 132.71, 130.46, 128.49, 128.48, 128.41, 127.45, 127.14, 126.34, 126.33, 121.67, 120.06, 119.04, 117.46, 117.17, 109.59, 48.80, 46.25.

**HRMS (m/z):** calcd for C<sub>26</sub>H<sub>24</sub>N [MH]<sup>+</sup>: 350.1903, found: 350.1901.

### (E)-1-(3-(1,3-diphenylallyl)-1H-indol-1-yl)ethan-1-one (3ae)

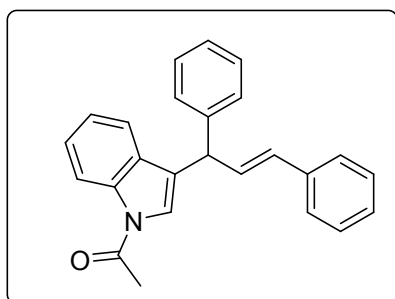

**3ae**

Yellow solid, m.p. 126-127°C, 60 mg, yield: 57%; *R<sub>f</sub>* = 0.33 (EtOAc/Petroleum ether 1:20).

**<sup>1</sup>H NMR (400 MHz, CDCl<sub>3</sub>):** δ 8.45 (d, *J* = 8.2 Hz, 1H), 7.44-7.13 (m, 13H), 7.12 (s, 1H), 6.68 (dd, *J* = 15.8, 7.3 Hz, 1H), 6.45 (d, *J* = 15.2 Hz, 1H), 5.05 (d, *J* = 7.3 Hz, 1H), 2.55 (s, 3H).

**<sup>13</sup>C NMR (101 MHz, CDCl<sub>3</sub>):** δ 168.53, 141.75, 137.06, 136.38, 131.66, 130.83,

129.87, 128.73, 128.61, 128.45, 127.56, 126.93, 126.43, 125.33, 125.03, 123.52, 123.22, 120.08, 45.95, 24.08.

**HRMS (m/z):** calcd for C<sub>25</sub>H<sub>22</sub>NO [MH]<sup>+</sup>: 352.1696, found: 352.1699.

**(E)-3-(1,3-diphenylallyl)-1-(pyrimidin-2-yl)-1H-indole (3af)**

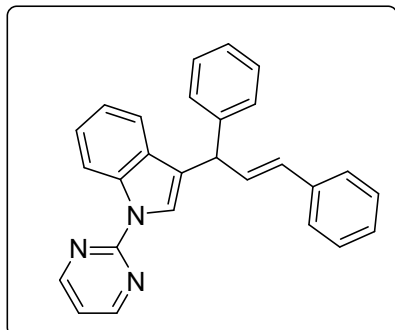

**3af**

Yellow solid, m.p. 142-143°C, 85 mg, yield: 73%; R<sub>f</sub> = 0.41 (EtOAc/Petroleum ether 1:20).

**<sup>1</sup>H NMR (400 MHz, CDCl<sub>3</sub>):** δ 8.81 (d, *J* = 8.4 Hz, 1H), 8.62 (d, *J* = 4.8 Hz, 2H), 8.05 (d, *J* = 1.2 Hz, 1H), 7.40 (d, *J* = 11.8 Hz, 5H), 7.37-7.11 (m, 8H), 6.94 (t, *J* = 4.8 Hz, 1H), 6.78 (dd, *J* = 15.8, 7.4 Hz, 1H), 6.48 (d, *J* = 14.6 Hz, 1H), 5.13 (d, *J* = 7.4 Hz, 1H).

**<sup>13</sup>C NMR (101 MHz, CDCl<sub>3</sub>):** δ 158.07, 157.69, 142.53, 137.39, 136.13, 131.74, 131.11, 130.48, 128.60, 128.56, 128.53, 127.30, 126.63, 126.44, 123.88, 122.71, 121.97, 119.91, 116.39, 115.88, 46.20.

**HRMS (m/z):** calcd for C<sub>27</sub>H<sub>22</sub>NO<sub>3</sub> [MH]<sup>+</sup>: 388.1808, found: 388.1805.

**(E)-3-(1,3-diphenylallyl)-2-methyl-1H-indole (3ag)<sup>[10]</sup>**

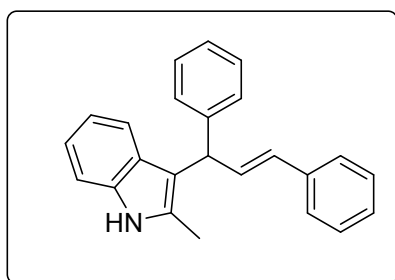

**3ag**

Yellow solid, m.p. 59-60°C, 81 mg, yield: 84%; R<sub>f</sub> = 0.26 (EtOAc/Petroleum ether 1:10).

**<sup>1</sup>H NMR (400 MHz, CDCl<sub>3</sub>):** δ 7.77 (s, 1H), 7.44-7.34 (m, 5H), 7.35-7.25 (m, 5H), 7.27-7.18 (m, 2H), 7.16-7.08 (m, 1H), 7.05-6.97 (m, 1H), 6.87 (dd, *J* = 15.8, 7.2 Hz, 1H), 6.45 (dd, *J* = 15.9, 1.5 Hz, 1H), 5.18 (d, *J* = 5.9 Hz, 1H), 2.37 (s, 3H).

**<sup>13</sup>C NMR (101 MHz, CDCl<sub>3</sub>):** δ 143.49, 137.58, 135.37, 132.21, 131.66, 130.61, 129.04, 128.52, 128.31, 128.28, 127.99, 127.12, 126.31, 126.13, 120.92, 119.43, 119.28, 112.86, 110.30, 45.10, 12.41.

**(E)-3-(1,3-diphenylallyl)-2-phenyl-1H-indole (3ah)** <sup>[10]</sup>

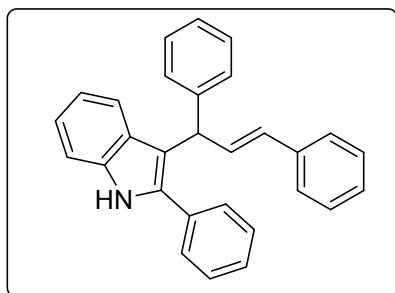

**3ah**

Yellow solid, m.p. 65-66°C, 106 mg, yield: 92%;  $R_f = 0.25$  (EtOAc/Petroleum ether 1:10).

**<sup>1</sup>H NMR (400 MHz, CDCl<sub>3</sub>):**  $\delta$  8.06 (s, 1H), 7.57 (dd,  $J = 7.5, 2.3$  Hz, 2H), 7.54-7.32 (m, 10H), 7.36-7.25 (m, 5H), 7.28-7.16 (m, 3H), 7.10-7.01 (m, 1H), 6.94 (dd,  $J = 15.8, 7.3$  Hz, 1H), 6.46 (dd,  $J = 15.8, 1.4$  Hz, 1H), 5.33 (d,  $J = 7.2$  Hz, 1H).

**<sup>13</sup>C NMR (101 MHz, CDCl<sub>3</sub>):**  $\delta$  143.53, 137.55, 136.29, 135.64, 133.01, 132.32, 131.12, 128.86, 128.66, 128.50, 128.35, 128.32, 128.09, 127.96, 127.16, 126.37, 126.17, 122.16, 121.26, 119.75, 113.89, 110.99, 45.19.

**(E)-3-(1,3-diphenylallyl)-5-methoxy-1H-indole (3ai)** <sup>[10]</sup>

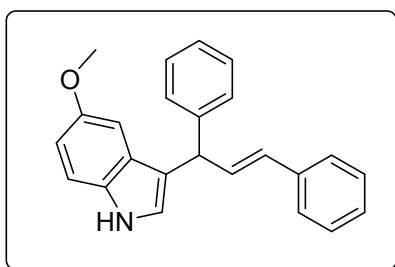

**3ai**

Yellow solid, m.p. 62-63°C, 81 mg, yield: 80%;  $R_f = 0.25$  (EtOAc/Petroleum ether 1:10).

**<sup>1</sup>H NMR (400 MHz, CDCl<sub>3</sub>):**  $\delta$  7.90 (s, 1H), 7.42-7.18 (m, 12H), 6.91-6.81 (m, 3H), 6.74 (dd,  $J = 15.8, 7.3$  Hz, 1H), 6.47 (d,  $J = 15.9$  Hz, 1H), 5.10 (d,  $J = 8.7$  Hz, 1H), 3.73 (s, 3H).

**<sup>13</sup>C NMR (101 MHz, CDCl<sub>3</sub>):**  $\delta$  153.79, 143.33, 137.52, 132.52, 131.83, 130.57, 128.53, 128.51, 128.45, 127.25, 127.18, 126.41, 126.33, 125.95, 123.48, 118.32, 112.15, 111.81, 101.83, 55.81, 46.24.

**(E)-6-chloro-3-(1,3-diphenylallyl)-1H-indole (3aj)** <sup>[11]</sup>

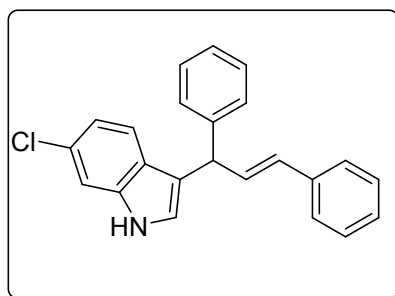

**3aj**

Yellow solid, m.p. 131-132°C, 80 mg, yield: 78%;  $R_f = 0.58$  (EtOAc/Petroleum ether 1:7).

**$^1\text{H}$  NMR (400 MHz,  $\text{CDCl}_3$ ):**  $\delta$  7.94 (s, 1H), 7.40-7.17 (m, 12H), 6.99 (dd,  $J = 8.5, 1.8$  Hz, 1H), 6.88 (dd,  $J = 2.4, 1.0$  Hz, 1H), 6.70 (dd,  $J = 15.8, 7.4$  Hz, 1H), 6.43 (d,  $J = 15.8$  Hz, 1H), 5.08 (d,  $J = 7.3$  Hz, 1H).

**$^{13}\text{C}$  NMR (101 MHz,  $\text{CDCl}_3$ ):**  $\delta$  143.02, 137.32, 137.01, 132.11, 130.79, 128.53, 128.51, 128.42, 128.07, 127.29, 126.55, 126.32, 125.40, 123.24, 120.78, 120.21, 118.92, 111.04, 46.08.

**(E)-5,6-dichloro-3-(1,3-diphenylallyl)-1H-indole (3ak)**

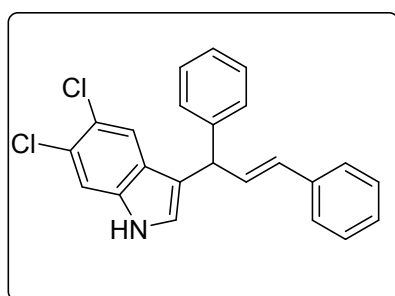

**3ak**

Yellow solid, m.p. 125-126°C, 105 mg, yield: 93%;  $R_f = 0.31$  (EtOAc/Petroleum ether 1:10).

**$^1\text{H}$  NMR (400 MHz,  $\text{CDCl}_3$ ):**  $\delta$  8.00 (s, 1H), 7.46 (s, 1H), 7.42 (s, 1H), 7.39 – 7.34 (m, 3H), 7.33 – 7.31 (m, 3H), 7.30 – 7.28 (m, 2H), 7.26 – 7.20 (m, 2H), 6.91 (dd,  $J = 2.4, 1.0$  Hz, 1H), 6.67 (dd,  $J = 15.8, 7.3$  Hz, 1H), 6.42 (dd,  $J = 15.8, 1.3$  Hz, 1H), 5.04 (d,  $J = 8.5$  Hz, 1H).

**$^{13}\text{C}$  NMR (101 MHz,  $\text{CDCl}_3$ ):**  $\delta$  142.65, 137.20, 135.40, 131.78, 131.00, 128.62, 128.57, 128.45, 128.44, 128.37, 127.40, 126.73, 126.58, 126.36, 126.00, 125.96, 125.91, 124.58, 123.52, 120.76, 118.56, 112.62, 45.87.

**HRMS (m/z):** calcd for  $\text{C}_{23}\text{H}_{18}\text{Cl}_2\text{N}$   $[\text{MH}]^+$ : 378.0811, found: 378.0804.

**5,11-dimethyl-6,12-di((E)-styryl)-5,6,11,12-tetrahydroindolo[3,2-**

**b]carbazole (3al)**



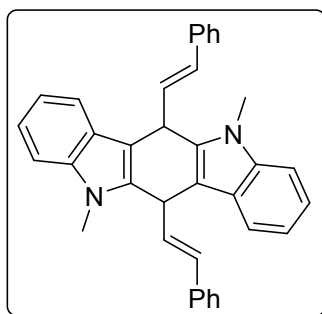

**3al**

Yellow solid, m.p. 148-150°C, 27 mg, yield: 37%;  $R_f = 0.54$  (EtOAc/Petroleum ether 1:20).

$^1\text{H NMR}$  (400 MHz,  $\text{CDCl}_3$ ):  $\delta$  7.74 (d,  $J = 7.8$  Hz, 1H), 7.35 (m, 3H), 7.30-7.22 (m, 3H), 7.17 (m, 2H), 6.81 (d,  $J = 15.7$  Hz, 1H), 6.27 (dd,  $J = 15.7, 8.0$  Hz, 1H), 5.20 (d,  $J = 7.8$  Hz, 1H), 3.83 (s, 3H).

$^{13}\text{C NMR}$  (101 MHz,  $\text{CDCl}_3$ ):  $\delta$  137.95, 136.94, 135.83, 131.75, 130.20, 128.47, 127.37, 126.36, 125.91, 121.32, 119.24, 118.60, 109.09, 108.94, 37.26, 30.07.

HRMS (m/z): calcd for  $\text{C}_{36}\text{H}_{30}\text{NNa}^+$   $[\text{M}+\text{Na}]^+$ : 513.2301, found: 513.2306.

**6,12-bis((E)-4-bromostyryl)-5,11-dimethyl-5,6,11,12-tetrahydroindolo[3,2-b]carbazole (3am)**

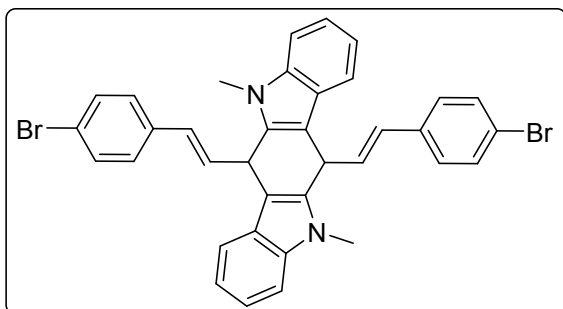

**3am**

Yellow solid, m.p. 158-159°C, 29 mg, yield: 30%;  $R_f = 0.51$  (EtOAc/Petroleum ether 1:20).

$^1\text{H NMR}$  (400 MHz,  $\text{CDCl}_3$ ):  $\delta$  7.70 (d,  $J = 7.9$  Hz, 1H), 7.36 (dd,  $J = 8.1, 6.1$  Hz, 3H), 7.28-7.20 (m, 1H), 7.21-7.10 (m, 3H), 6.70 (d,  $J = 15.7$  Hz, 1H), 6.26 (dd,  $J = 15.7, 7.8$  Hz, 1H), 5.18 (d,  $J = 7.7$  Hz, 1H), 3.82 (s, 3H).

$^{13}\text{C NMR}$  (101 MHz,  $\text{CDCl}_3$ ):  $\delta$  137.93, 135.77, 135.61, 132.41, 131.61, 131.57, 128.98, 127.84, 125.79, 121.48, 121.15, 119.37, 118.46, 109.18, 108.82, 37.09, 30.07.

HRMS (m/z): calcd for  $\text{C}_{36}\text{H}_{28}\text{N}_2\text{Br}_2\text{Na}^+$   $[\text{M}+\text{Na}]^+$ : 669.0511, found: 669.0518.

## 5. X-Ray Analysis

The X-ray quality crystals of **3af** were grown from ethyl acetate.

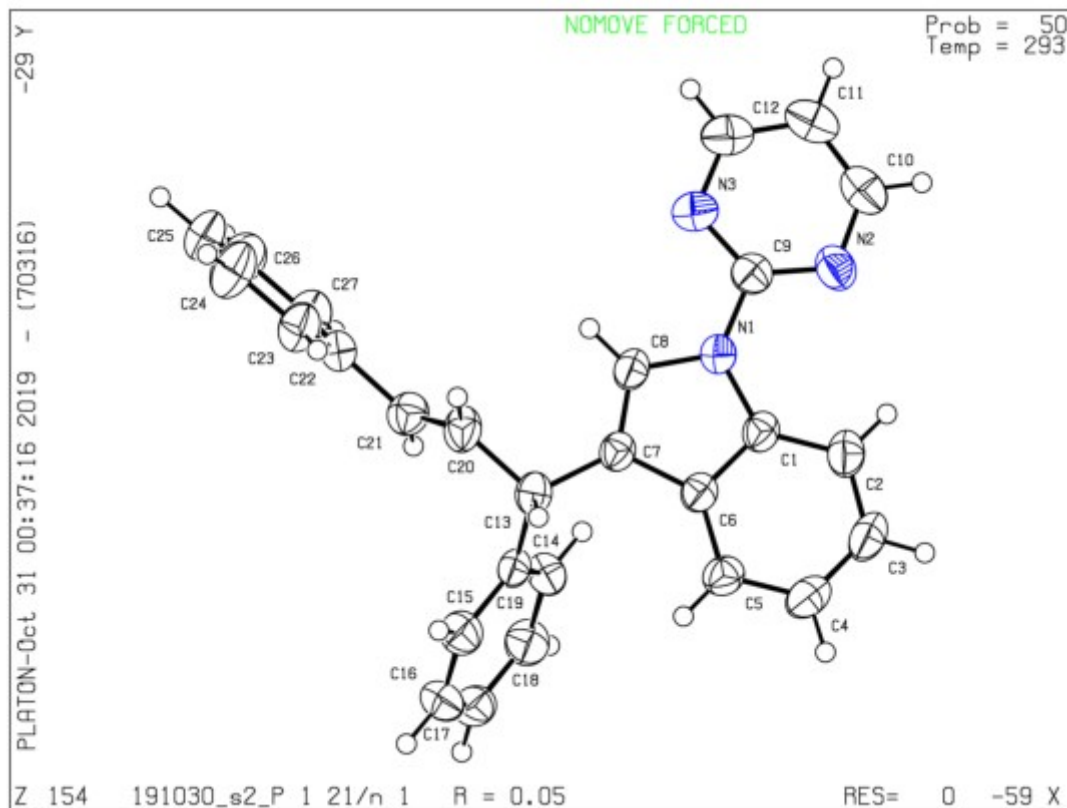

Figure S1. ORTEP Drawing of **3af** (CCDC)

The X-ray quality crystals of **3al** were grown from ethyl acetate and dichloromethane.

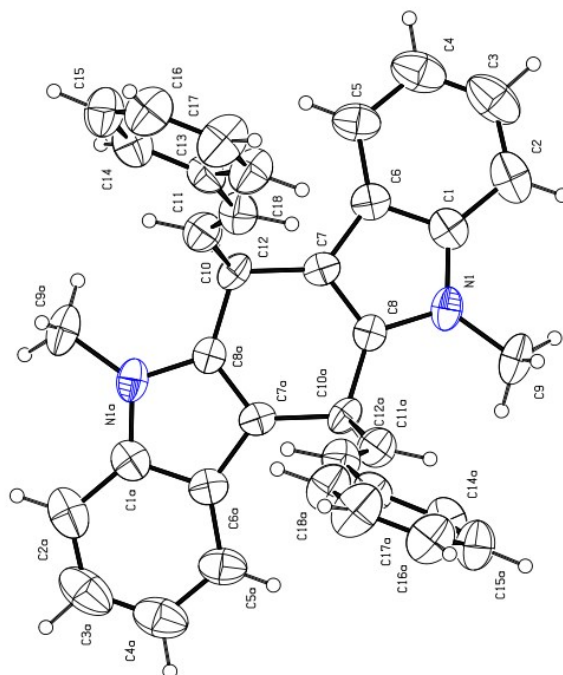

Figure S2. ORTEP Drawing of **3al** (CCDC)

## 6. References

1. H. Shen, X. Zhang, Q. Liu, J. Pan, W. Hu, Y. Xiong and X. Zhu, Direct oxidative cyanation of tertiary amines promoted by in situ generated hypervalent iodine (III)-CN intermediate, *Tetrahedron Lett.*, 2015, **56**, 5628-5631.
2. X.-Z. Shu, Y.-F. Yang, Xiao-Feng Xia, K.-G. Ji, X.-Y. Liu and Y.-M. Liang, Platinum-catalyzed cross-dehydrogenative coupling reaction in the absence of oxidant, *Org. Biomol. Chem.*, 2010, **8**, 4077-4079.
3. S. Olguín-Urbe, M. V. Mijangos, Y. A. Amador-Sánchez, M. A. Sánchez-Carmona and L. D. Miranda, Expedited Synthesis of Matrine Analogues through an Oxidative Cascade Addition/Double-Cyclization Radical Process, *Eur. J. Org. Chem.*, 2017, 2481-2485.
4. Z.-L. Yan, W.-L. Chen, Y.-R. Gao, S. Mao, Y.-L. Zhang and Y.-Q. Wang, Palladium - Catalyzed Intermolecular C-2 Alkenylation of Indoles Using Oxygen as the Oxidant, *Adv. Synth. Catal.*, 2014, **356**, 1085-1092.
5. M. Nishino, K. Hirano, T. Satoh and M. Miura, Copper-Mediated and Copper-Catalyzed Cross-Coupling of Indoles and 1,3-Azoles: Double C-H Activation, *Angew. Chem. Int. Ed.*, 2012, **51**, 6993-6997.
6. (a) B. Ding, Z. Zhang, Y. Liu, M. Sugiya and T. Imamoto, Chemoselective transfer hydrogenation of  $\alpha$ ,  $\beta$ -unsaturated ketones catalyzed by pincer-Pd complexes using alcohol as a hydrogen source, *Org. Lett.*, 2013, **15**, **14**, 3690-3693; (b) I. M. Ferreira, E. B. Meira, I. G. Rosset and A. L. M. Porto, Chemoselective biohydrogenation of  $\alpha$ ,  $\beta$ - and  $\alpha$ ,  $\beta$ ,  $\gamma$ ,  $\delta$ -unsaturated ketones by the marine-derived fungus *Penicillium citrinum* CBMAI 1186 in a biphasic system, *Journal of Molecular Catalysis B: Enzymatic*, 2015, **115**, 59-65. (c) A. Sultan, A. R. Raza, M. Abbas, K. M. Khan, M. N. Tahir and N. Saari, Evaluation of silica-H<sub>2</sub>SO<sub>4</sub> as an efficient heterogeneous catalyst for the synthesis of chalcones, *Molecules*, 2013, **18**, 10081-10094; (d) Z. Li, X. L. Chen, Y. J. Fu, W. Wang and M. Luo, A facile synthesis of trisubstituted alkenes from  $\beta$ -diketones and aldehydes with AlCl<sub>3</sub> as catalyst, *Res Chem Intermed.*, 2012, **38**, 25-35; (e) Y. H. He, Y. Hu and Z. Guan, Natural  $\alpha$ -amino acid L-lysine-catalyzed Knoevenagel condensations of  $\alpha$ ,  $\beta$ -unsaturated aldehydes and 1, 3-dicarbonyl compounds, *Synthetic Communications*, 2011, **41**, 1617-1628; (f) Y.

Ma, J. Li, J. Ye, D. Liu and W. Zhang, Synthesis of chiral chromanols via a RuPHOX–Ru catalyzed asymmetric hydrogenation of chromones, *Chem. Commun.*, 2018, **54**, 13571-13574.

7. W. Gladkowski, A. Skrobiszewski, M. Mazur, M. Siepka, A. Pawlak, B. Obmińska-Mrukowicz, A. Bialonska, D. Poradowski, A. Drynda and M. Urbaniak, Synthesis and anticancer activity of novel halolactones with  $\beta$ -aryl substituents from simple aromatic aldehydes, *Tetrahedron*. 2013, **69**, 10414-10423.

8. M. Gómez-Martínez, A. Baeza and D. A. Alonso, Pinacol Rearrangement and Direct Nucleophilic Substitution of Allylic Alcohols Promoted by Graphene Oxide and Graphene Oxide CO<sub>2</sub>H, *ChemCatChem.*, 2017, **9**, 1032-1039.

9. B. Yang and Z.-X. Wang, Nickel-Catalyzed Cross-Coupling of Allyl Alcohols with Aryl-or Alkenylzinc Reagents, *J. Org. Chem.* 2017, **82**, 4542-4549.

10. G.-P. Fan, Z. Liu and G.-W. Wang, Efficient ZnBr<sub>2</sub>-catalyzed reactions of allylic alcohols with indoles, sulfamides and anilines under high-speed vibration milling conditions, *Green Chem.*, 2013, **15**, 1659-1664.

11. T. Mino, M. Ishikawa, K. Nishikawa, K. Wakui and M. Sakamoto, Palladium-catalyzed asymmetric allylic alkylation of indoles by C-N bond axially chiral phosphine ligands, *Tetrahedron: Asymmetry*, 2013, **24**, 499-504.

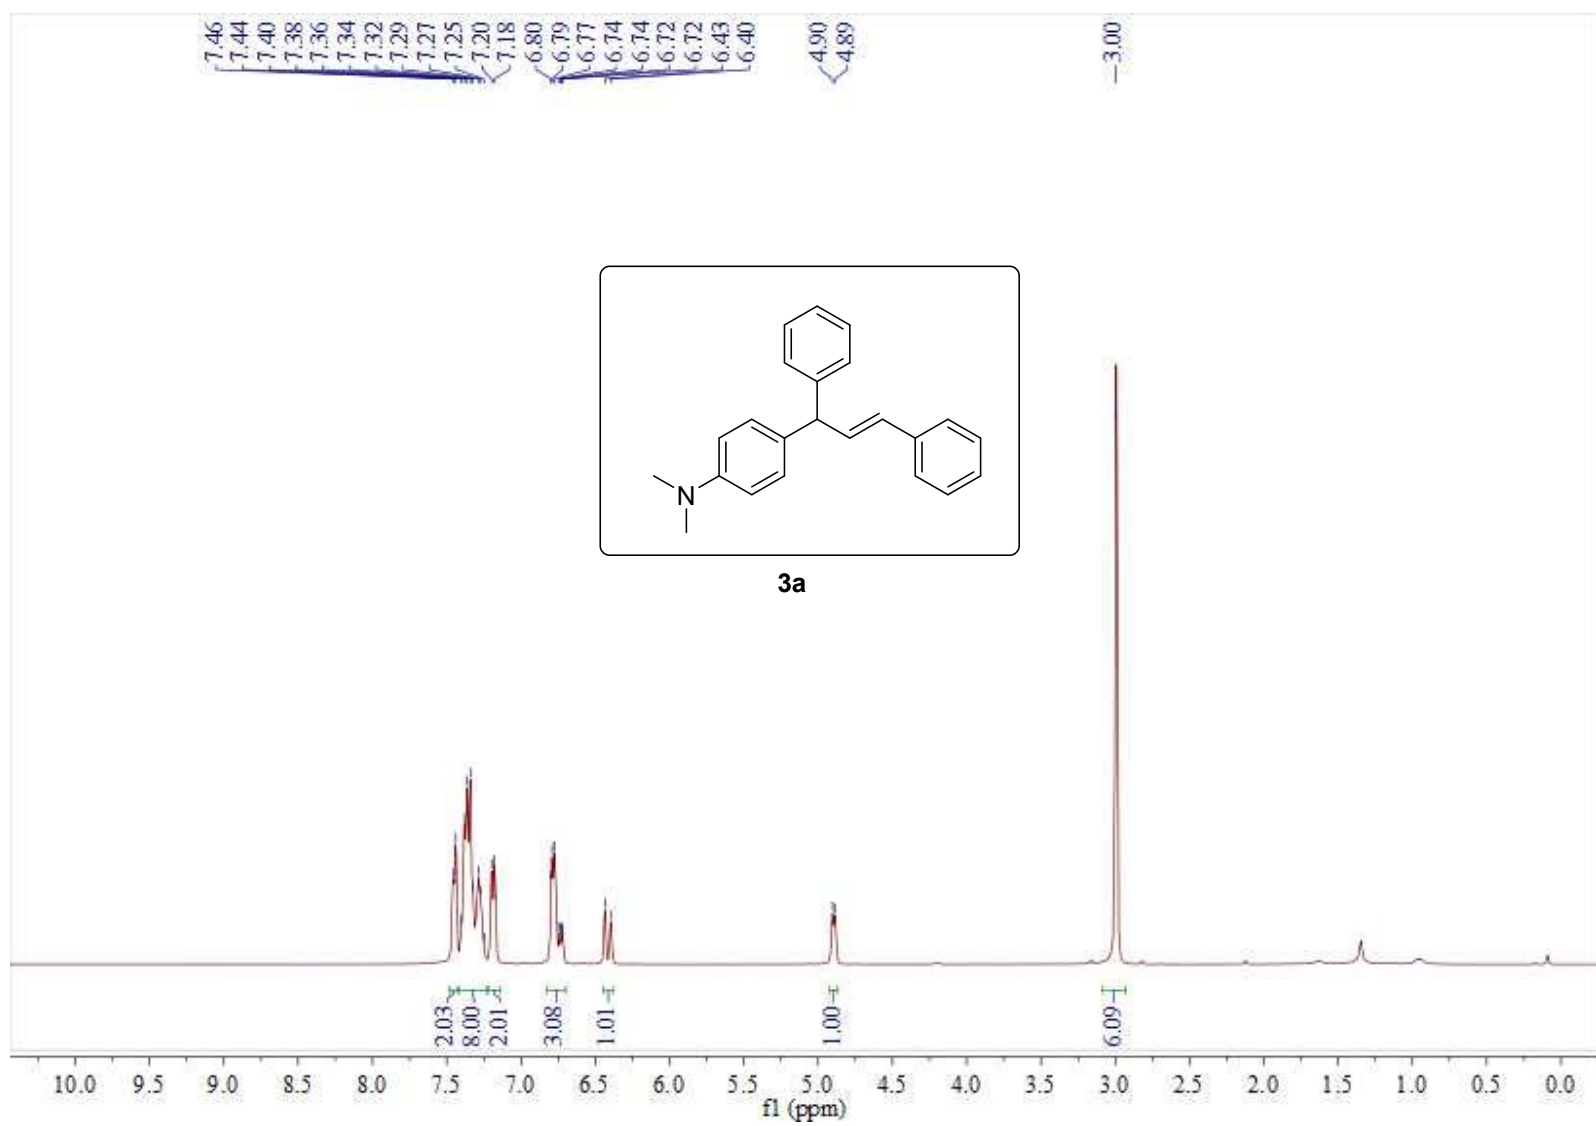

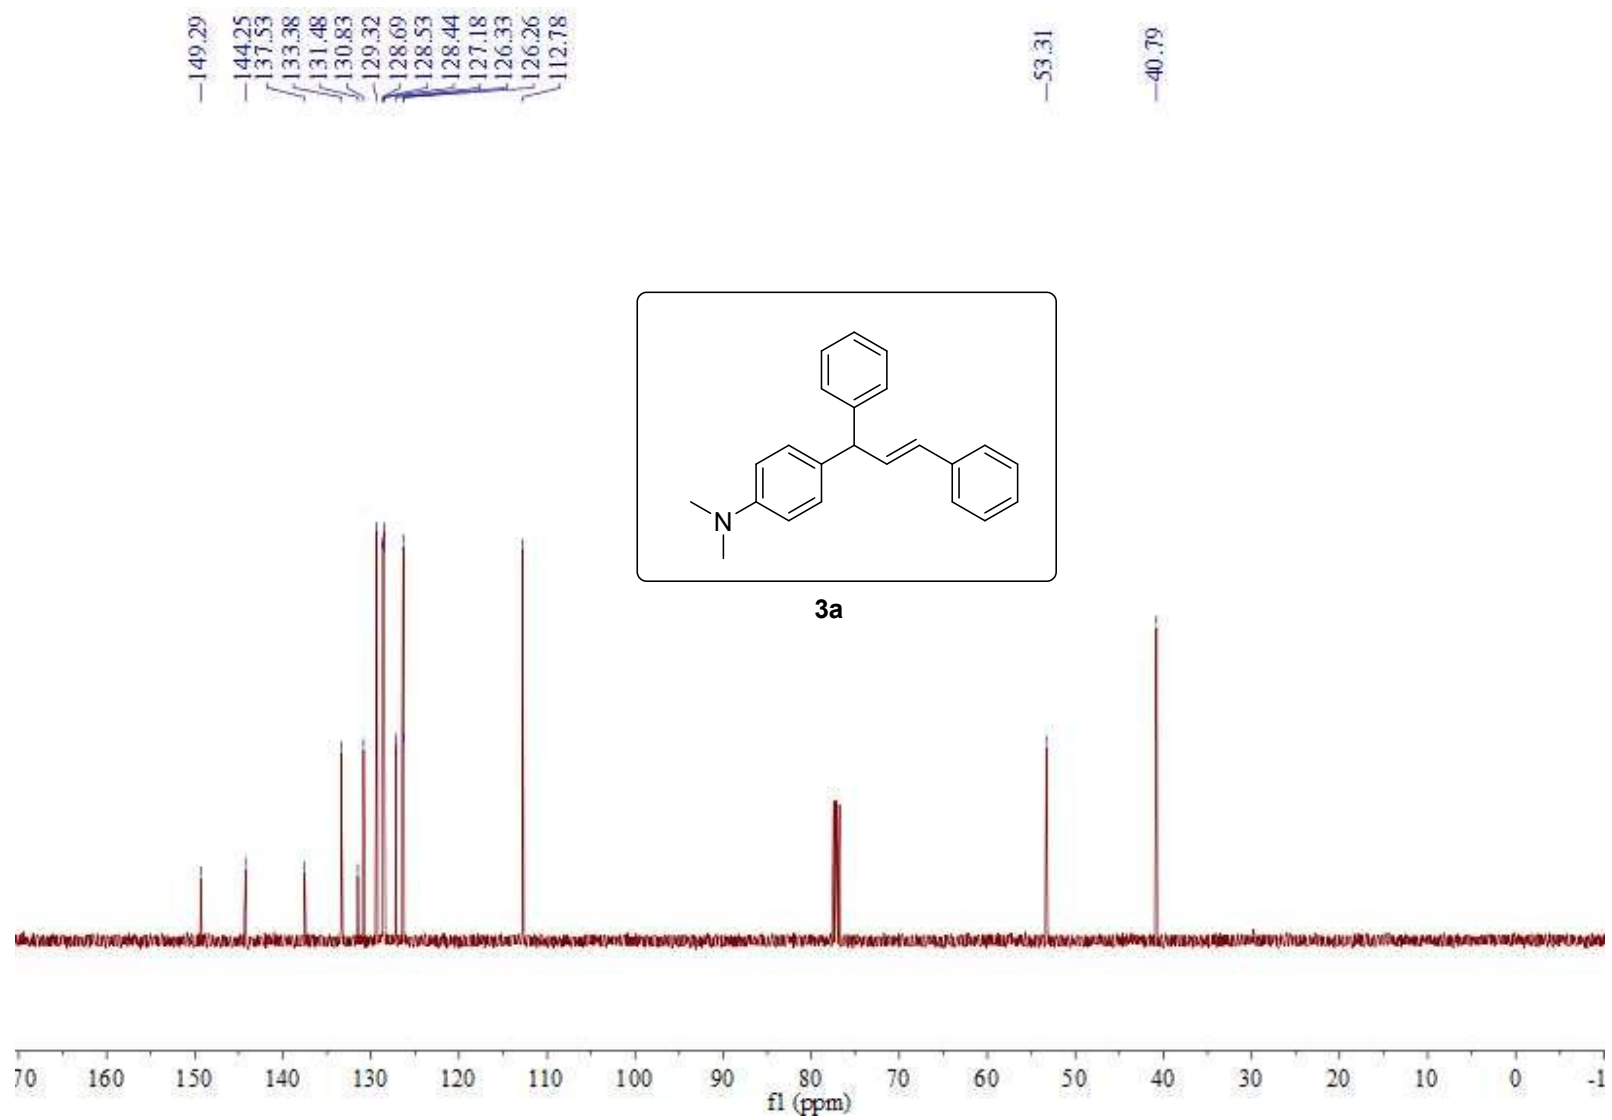

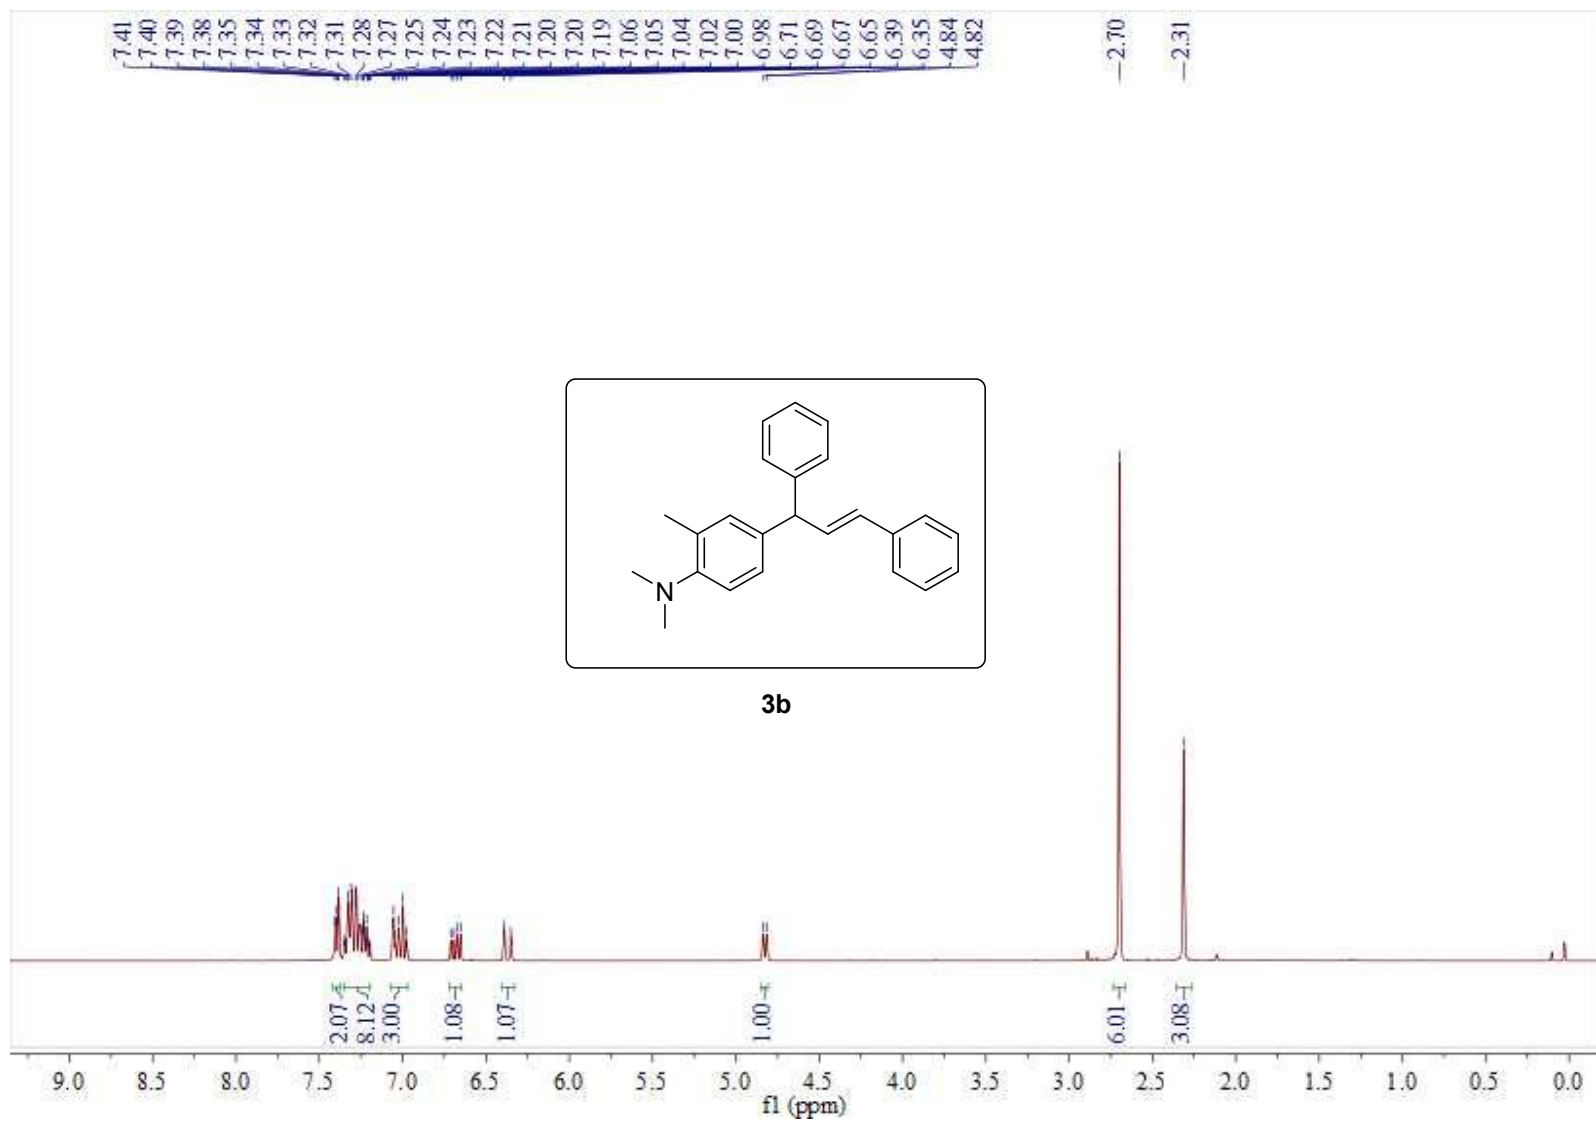

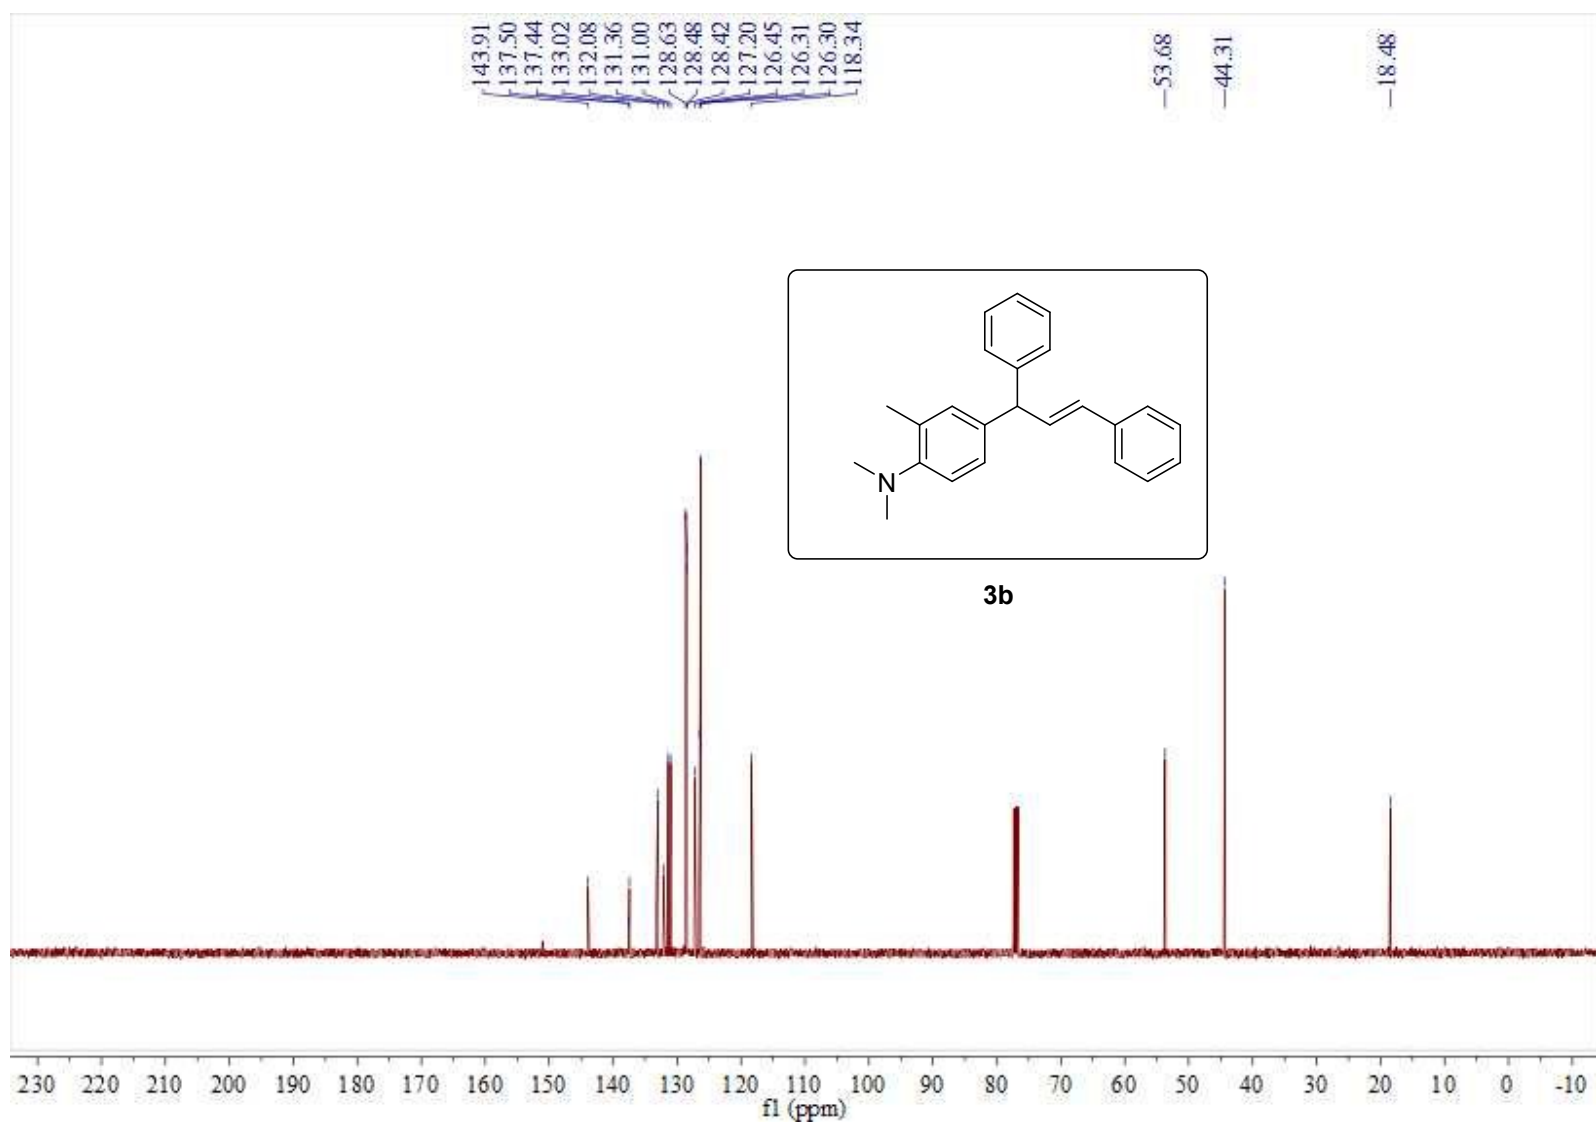



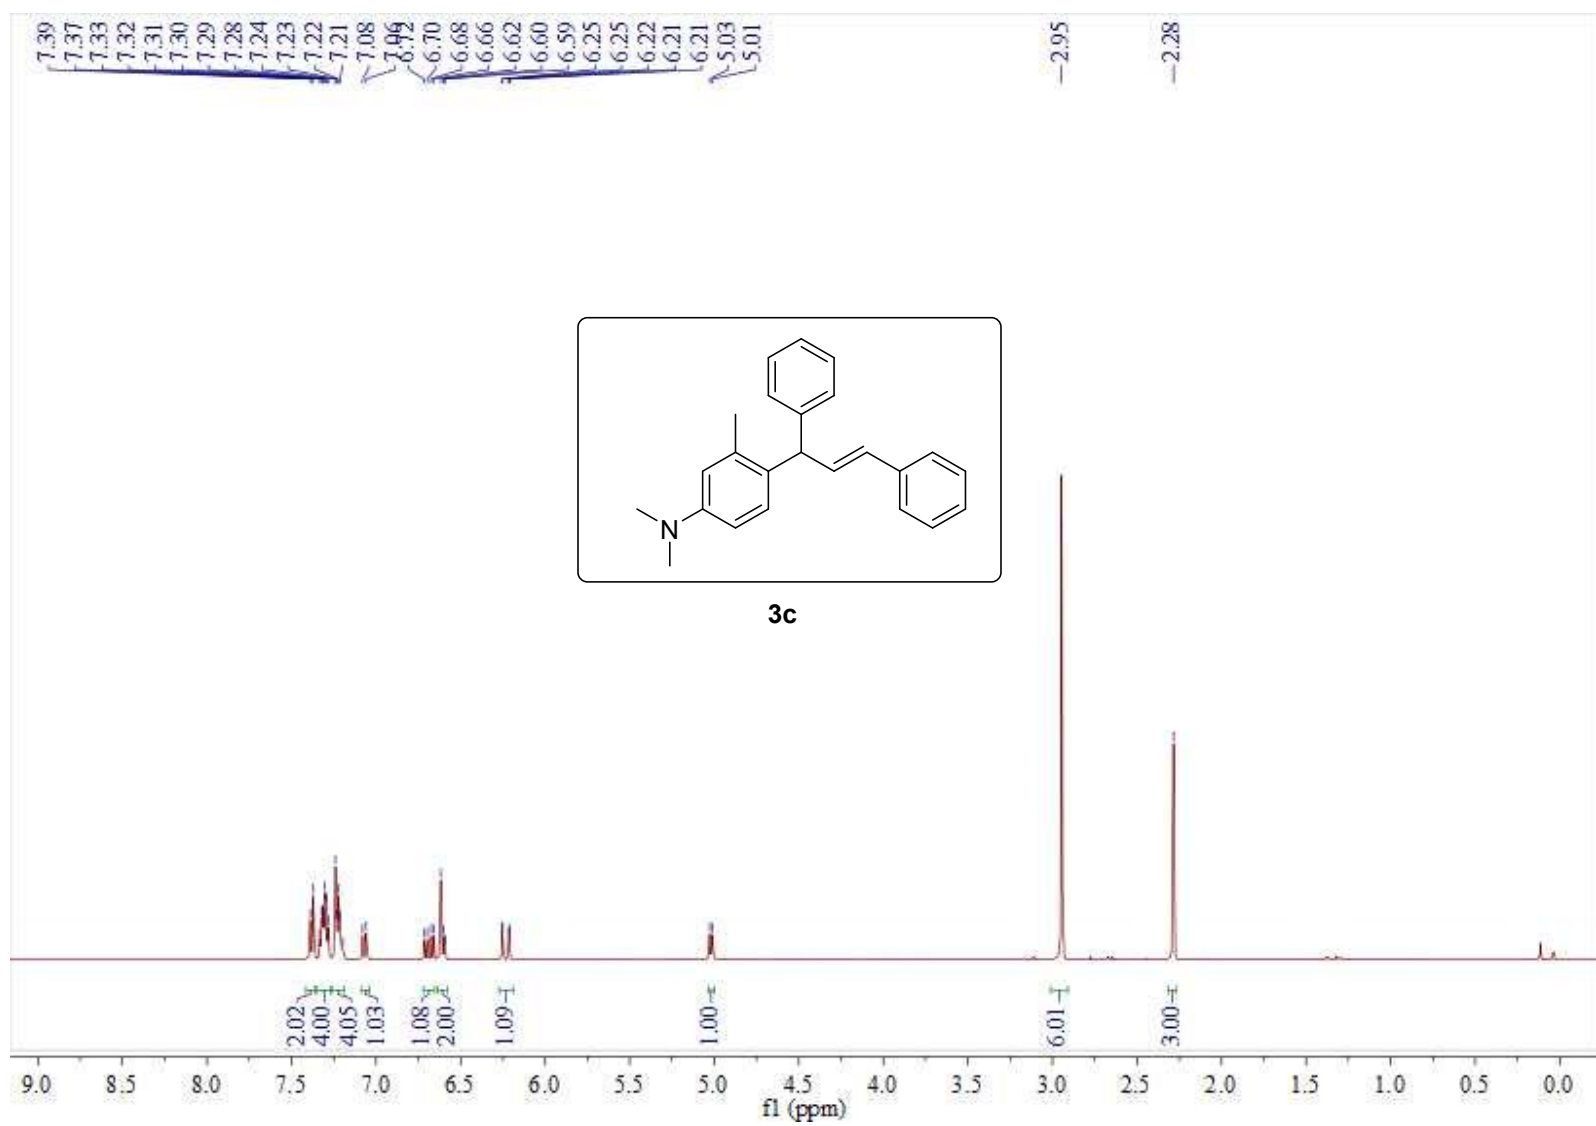

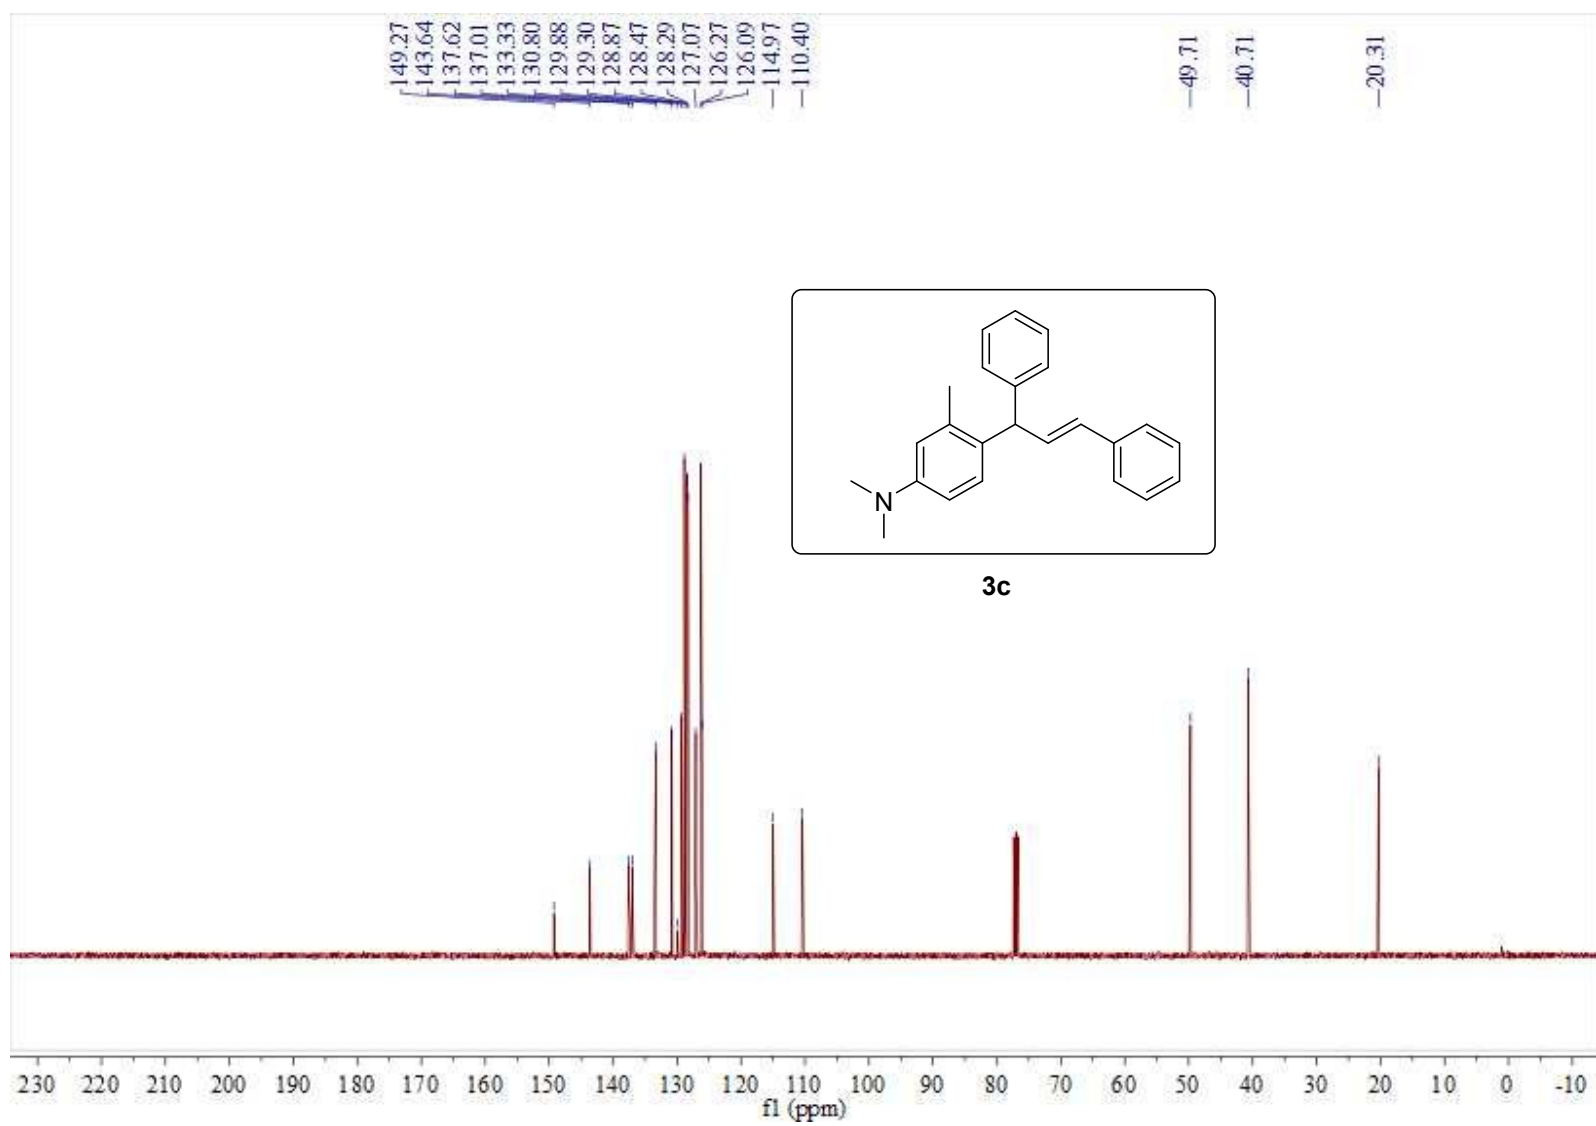

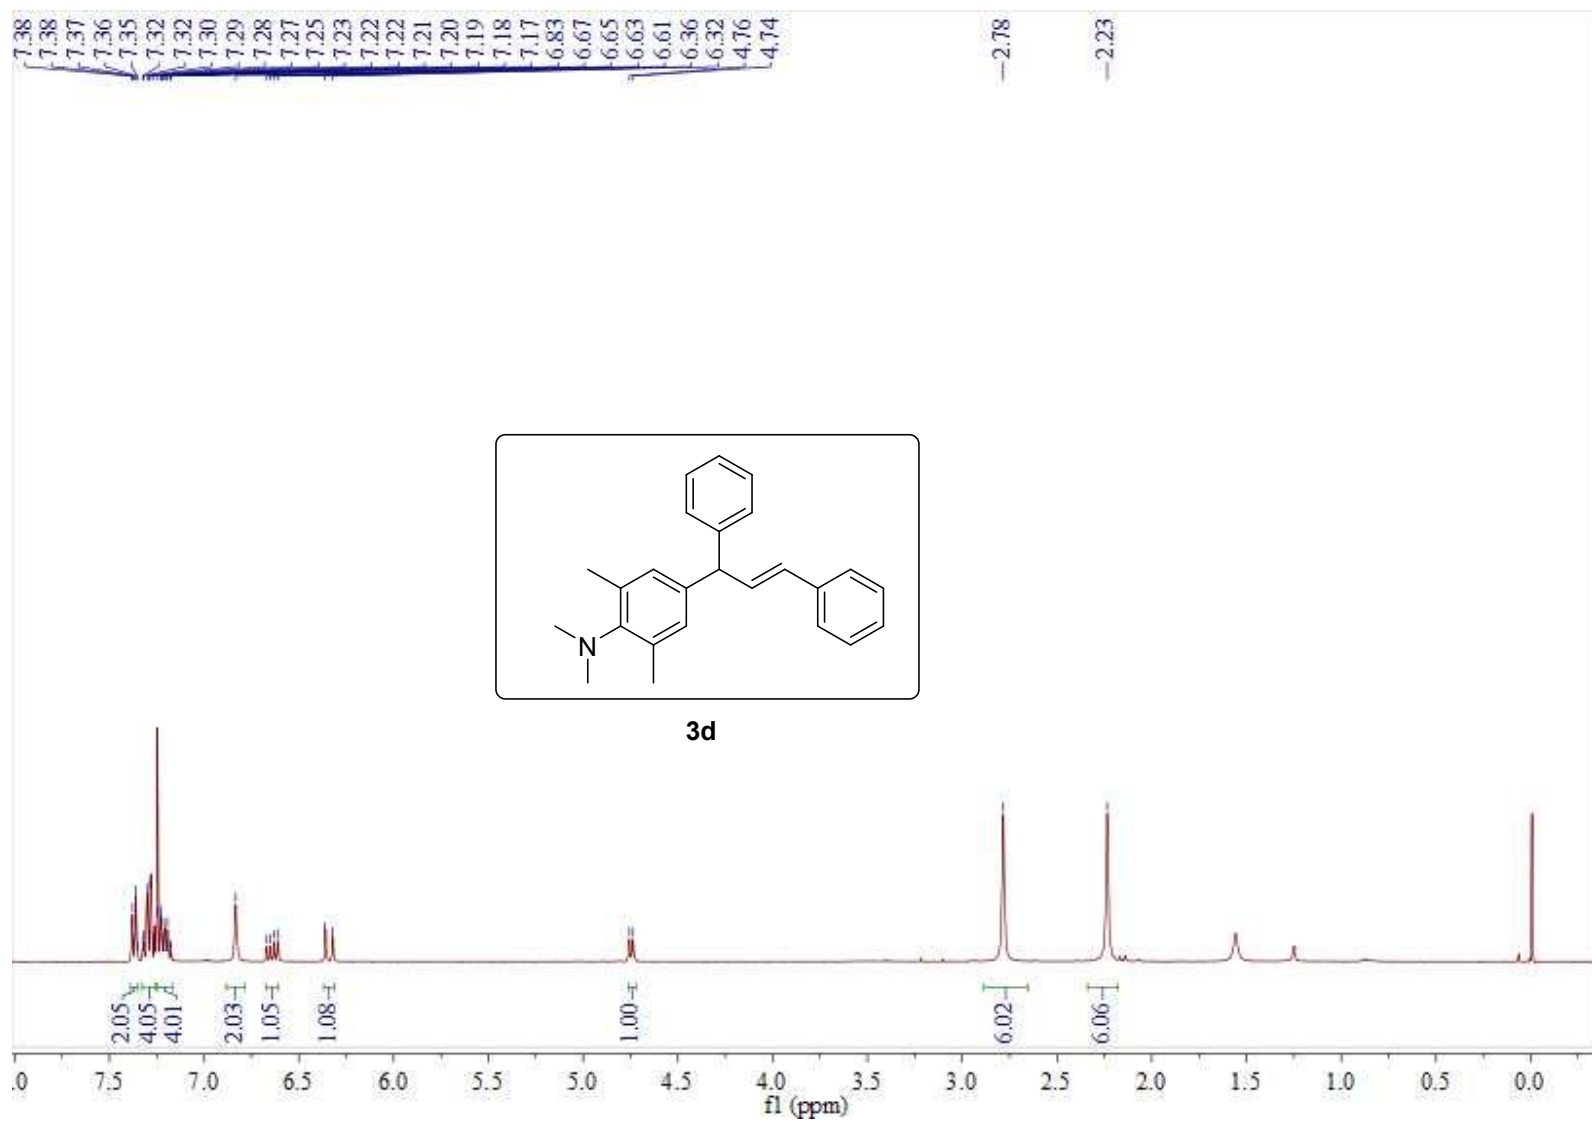

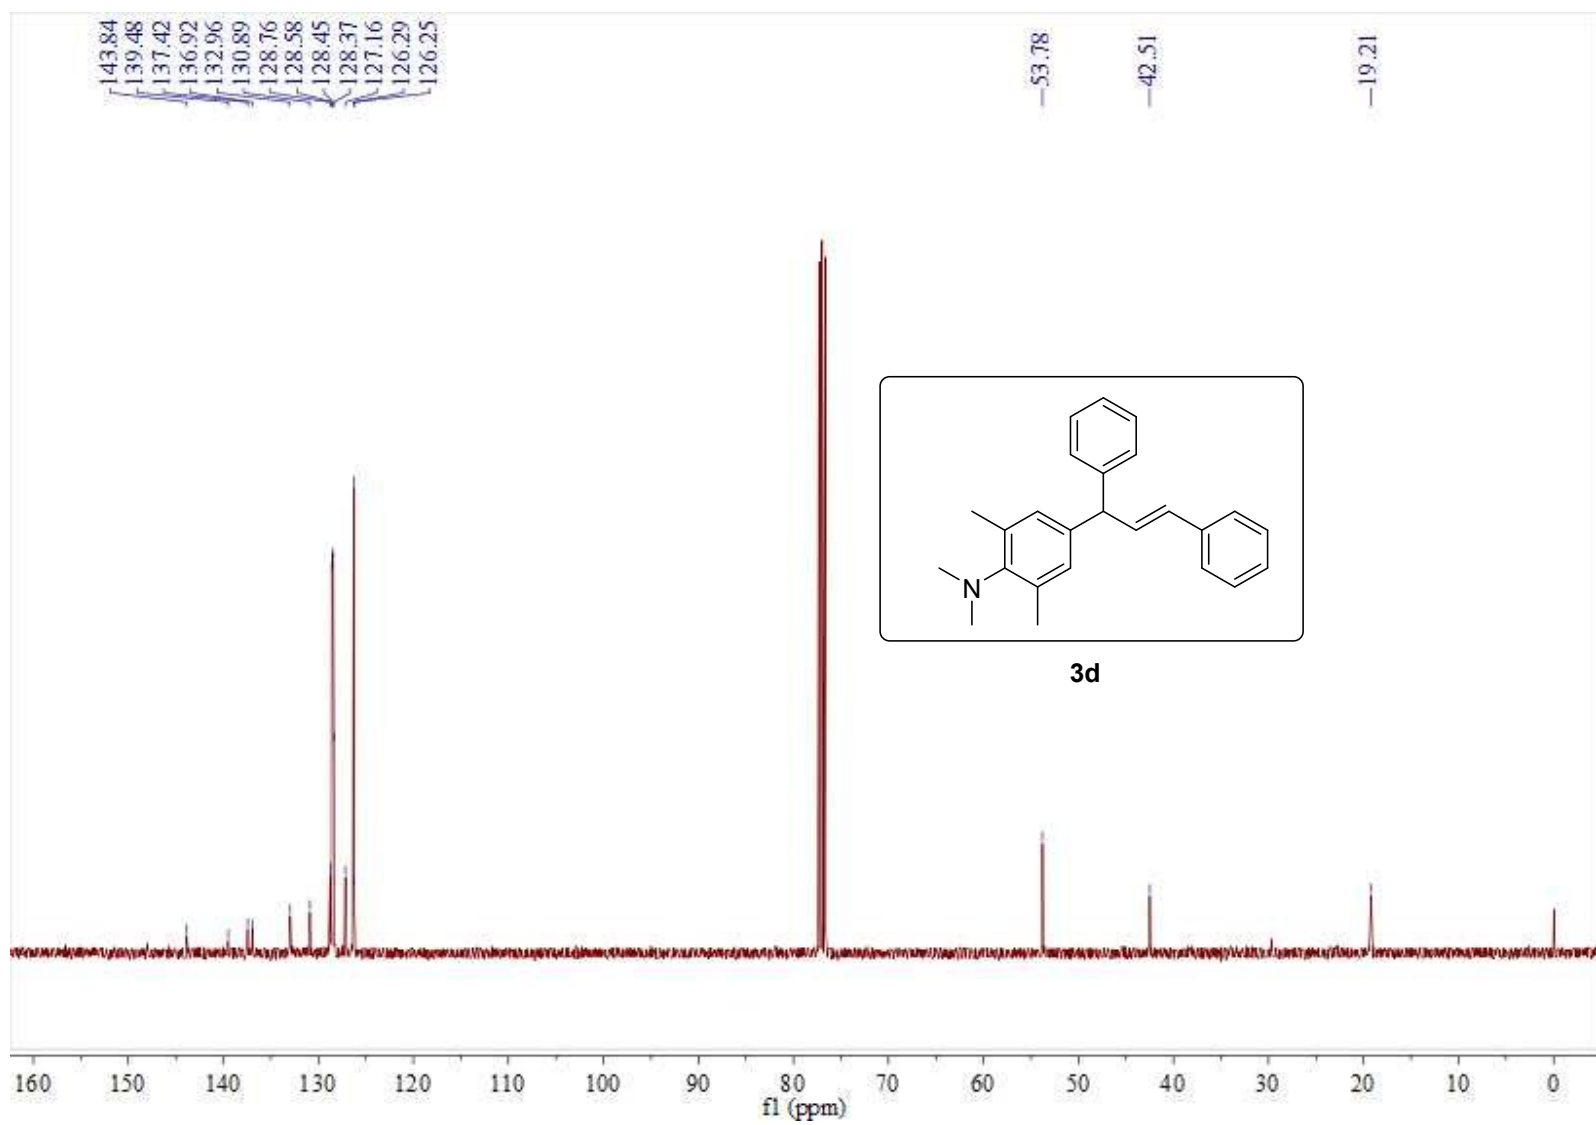

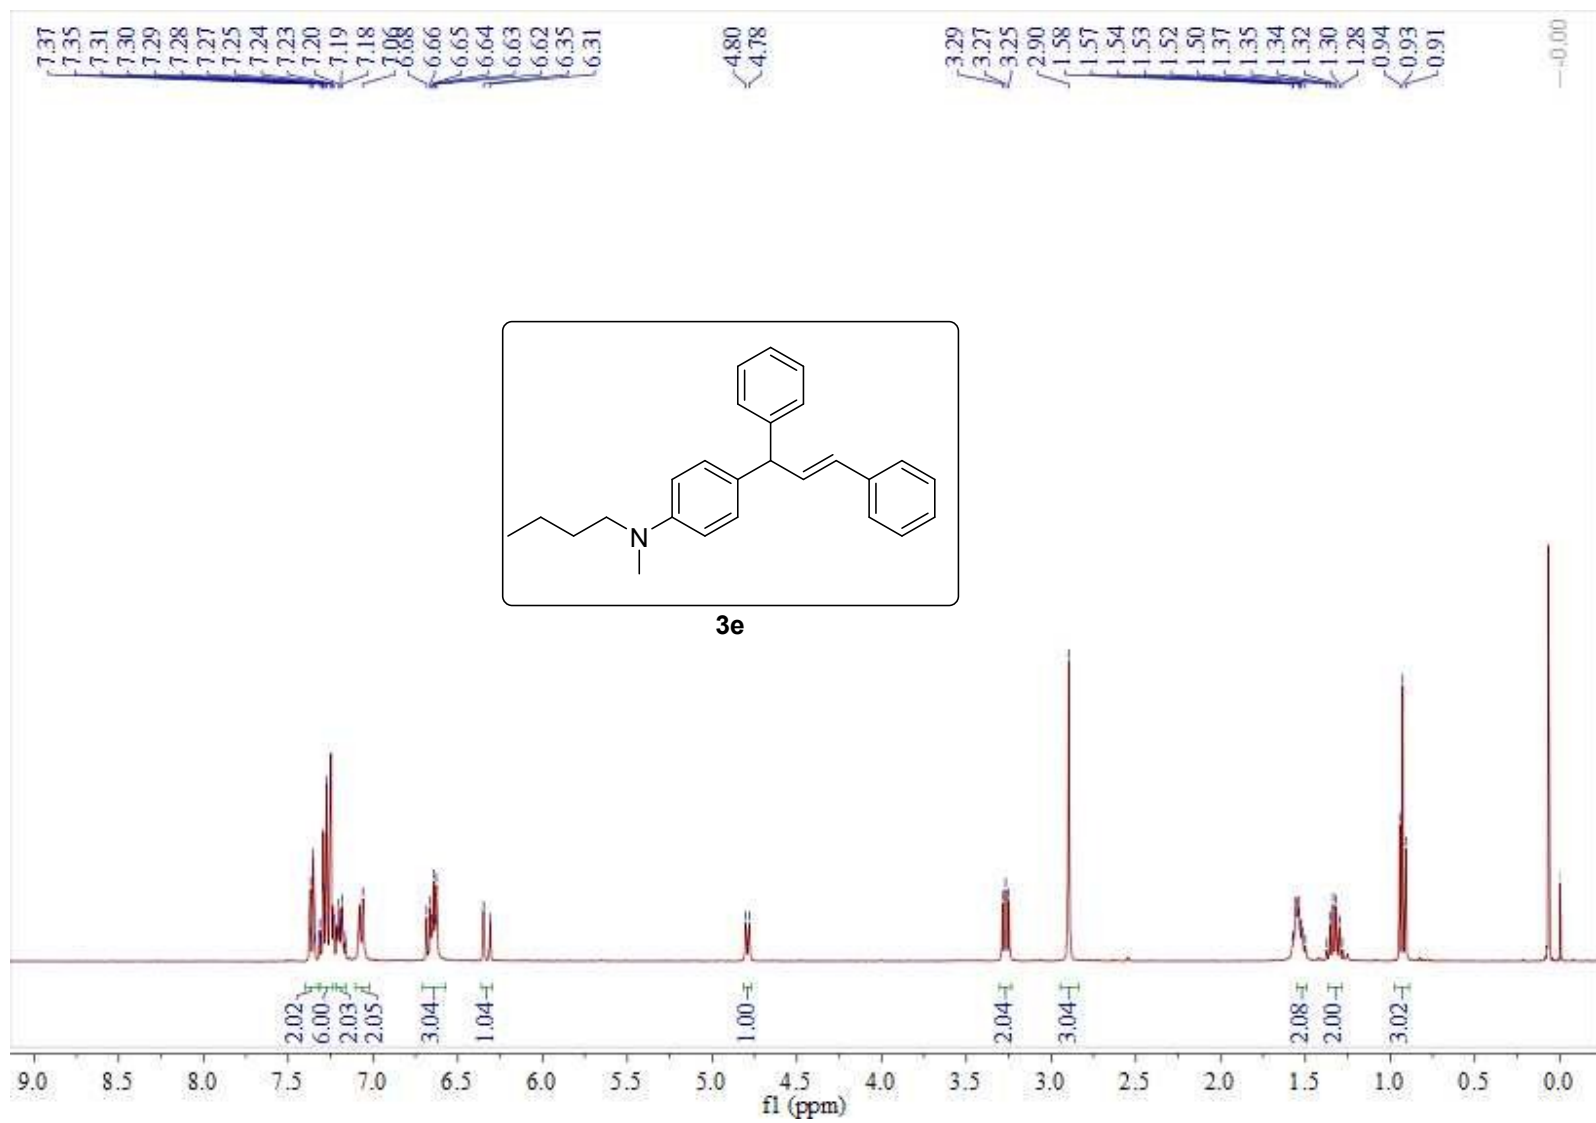

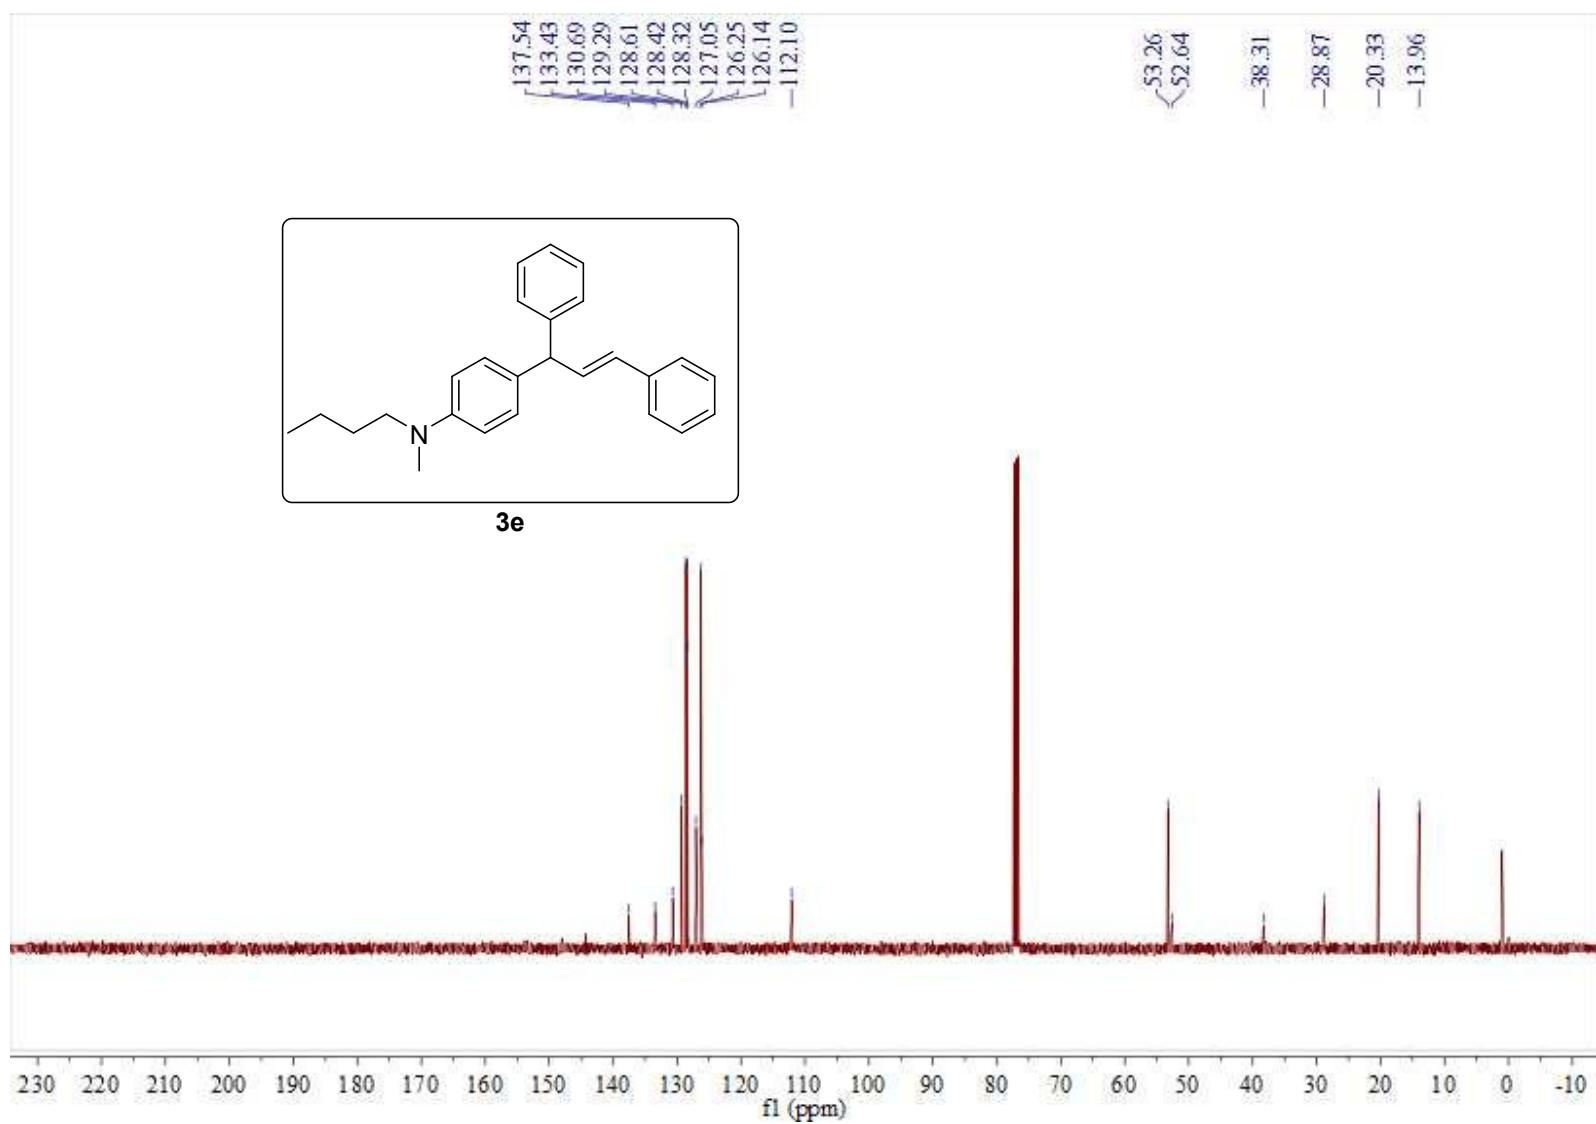

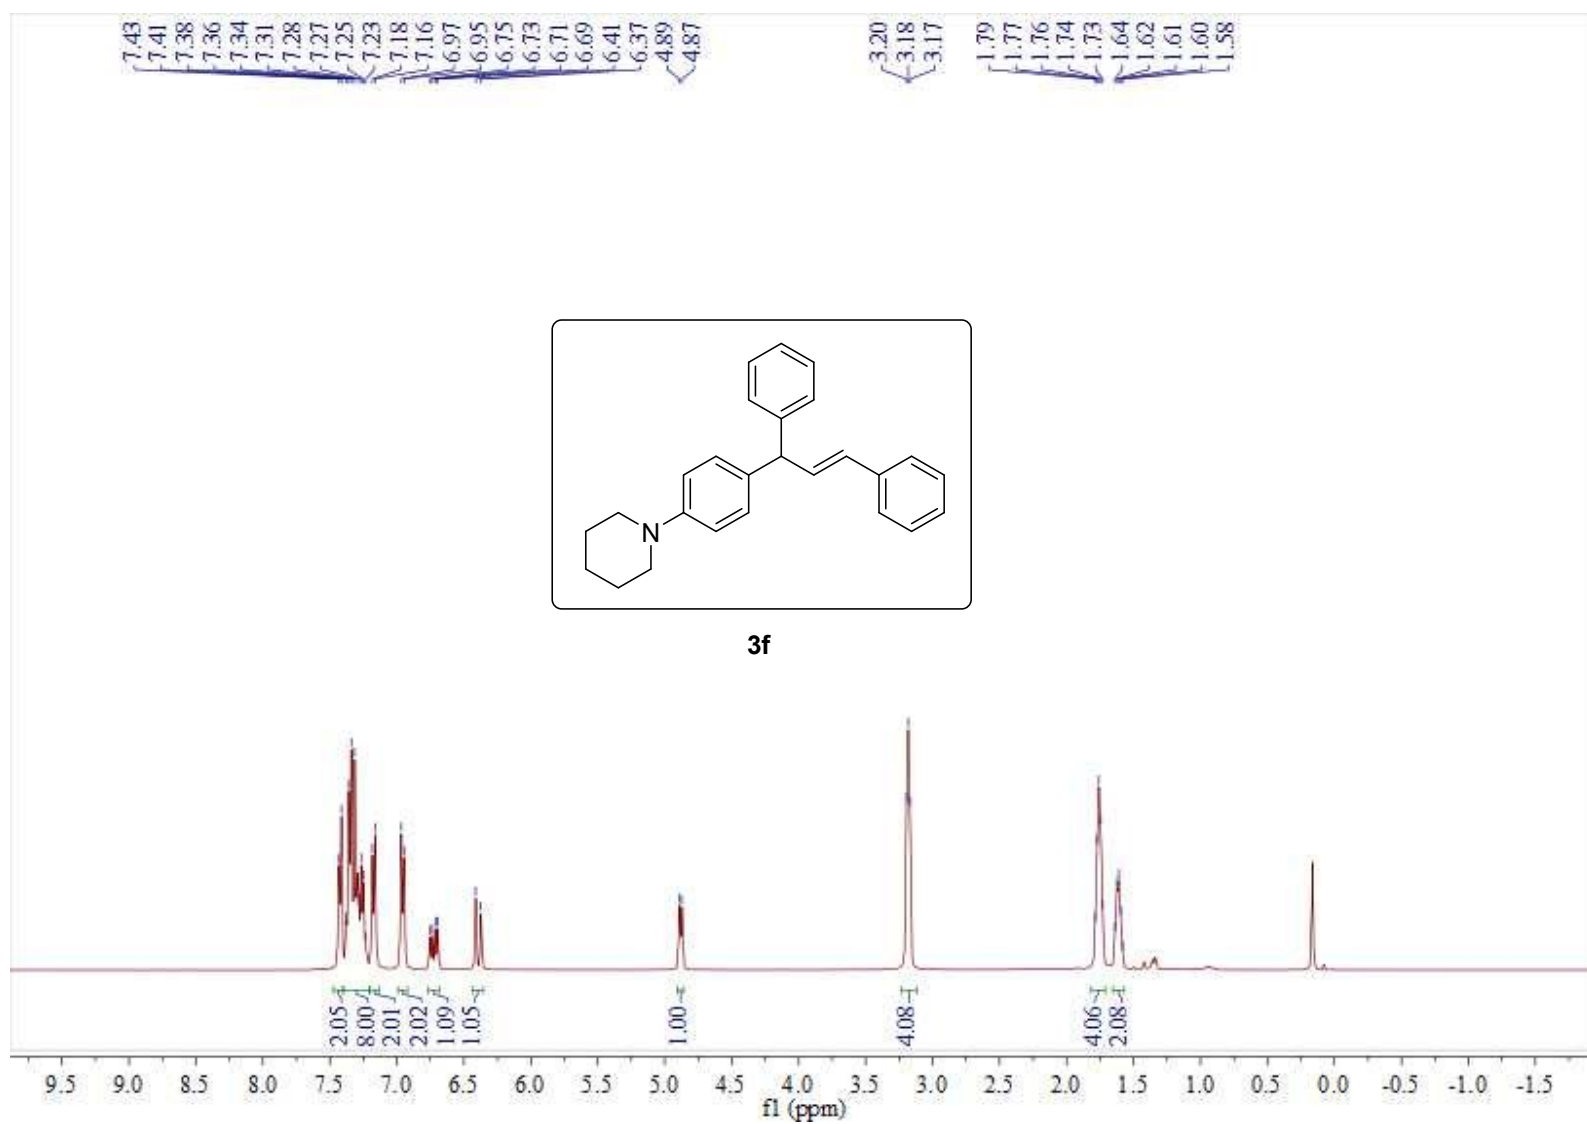

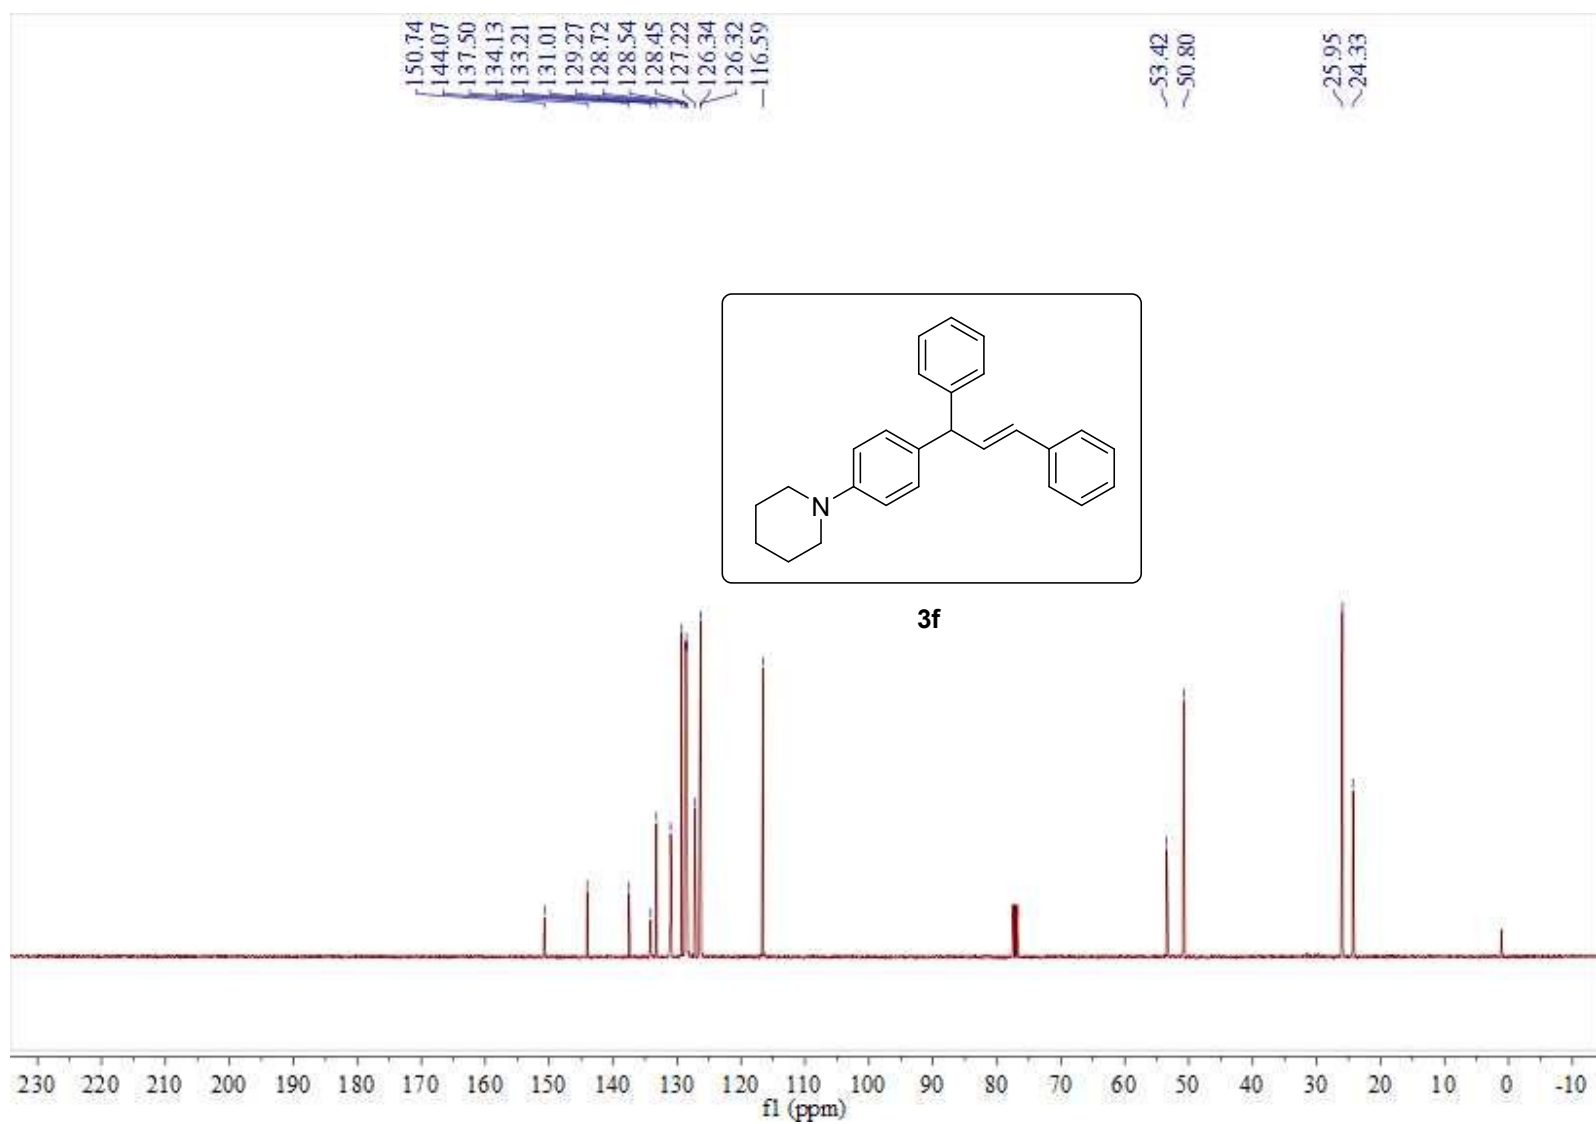



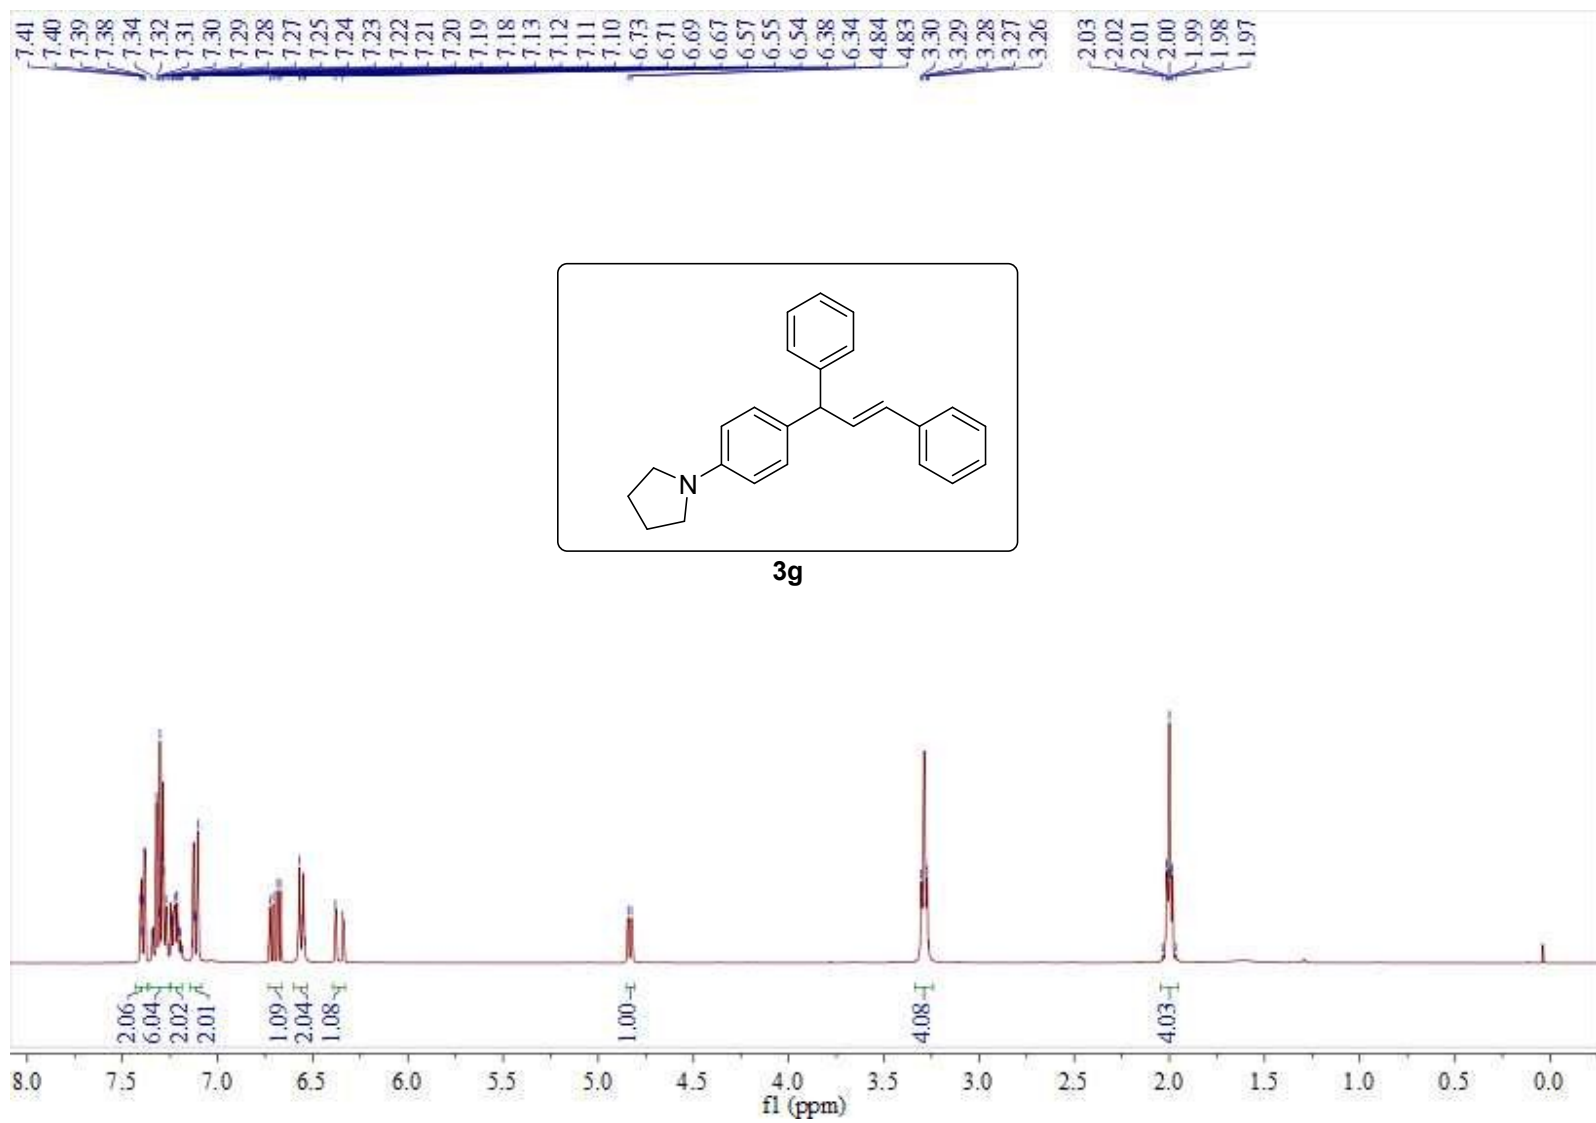

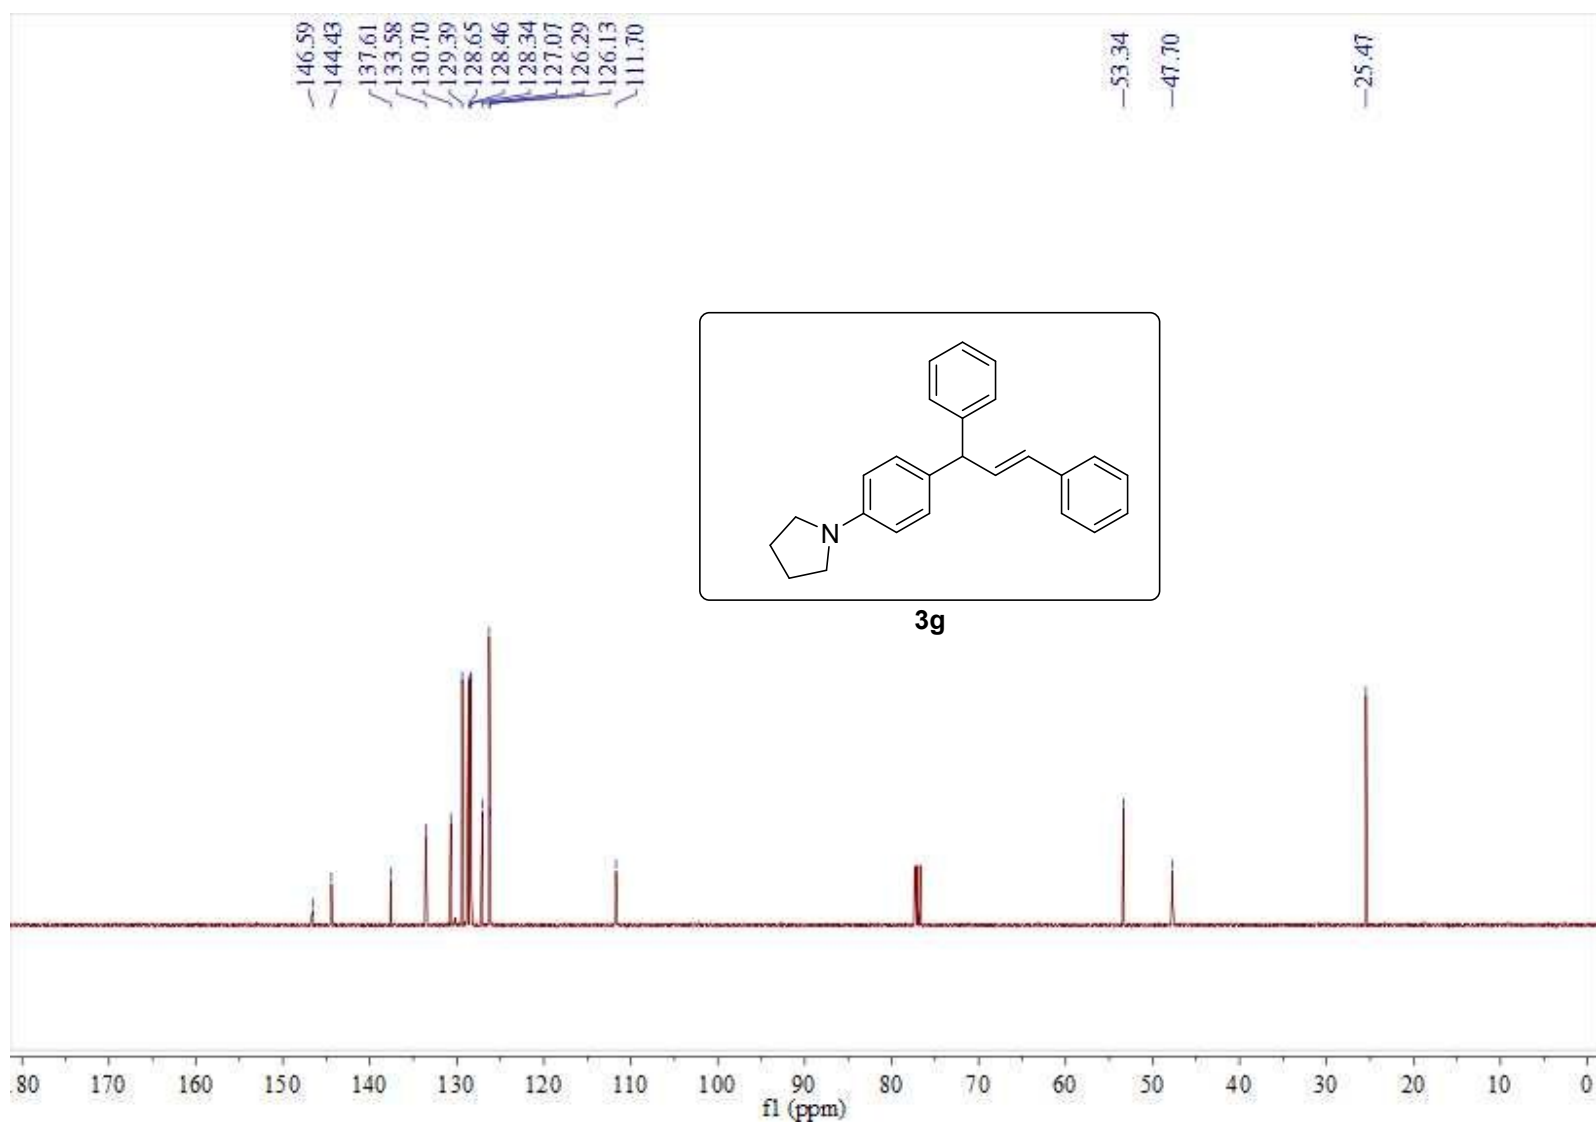

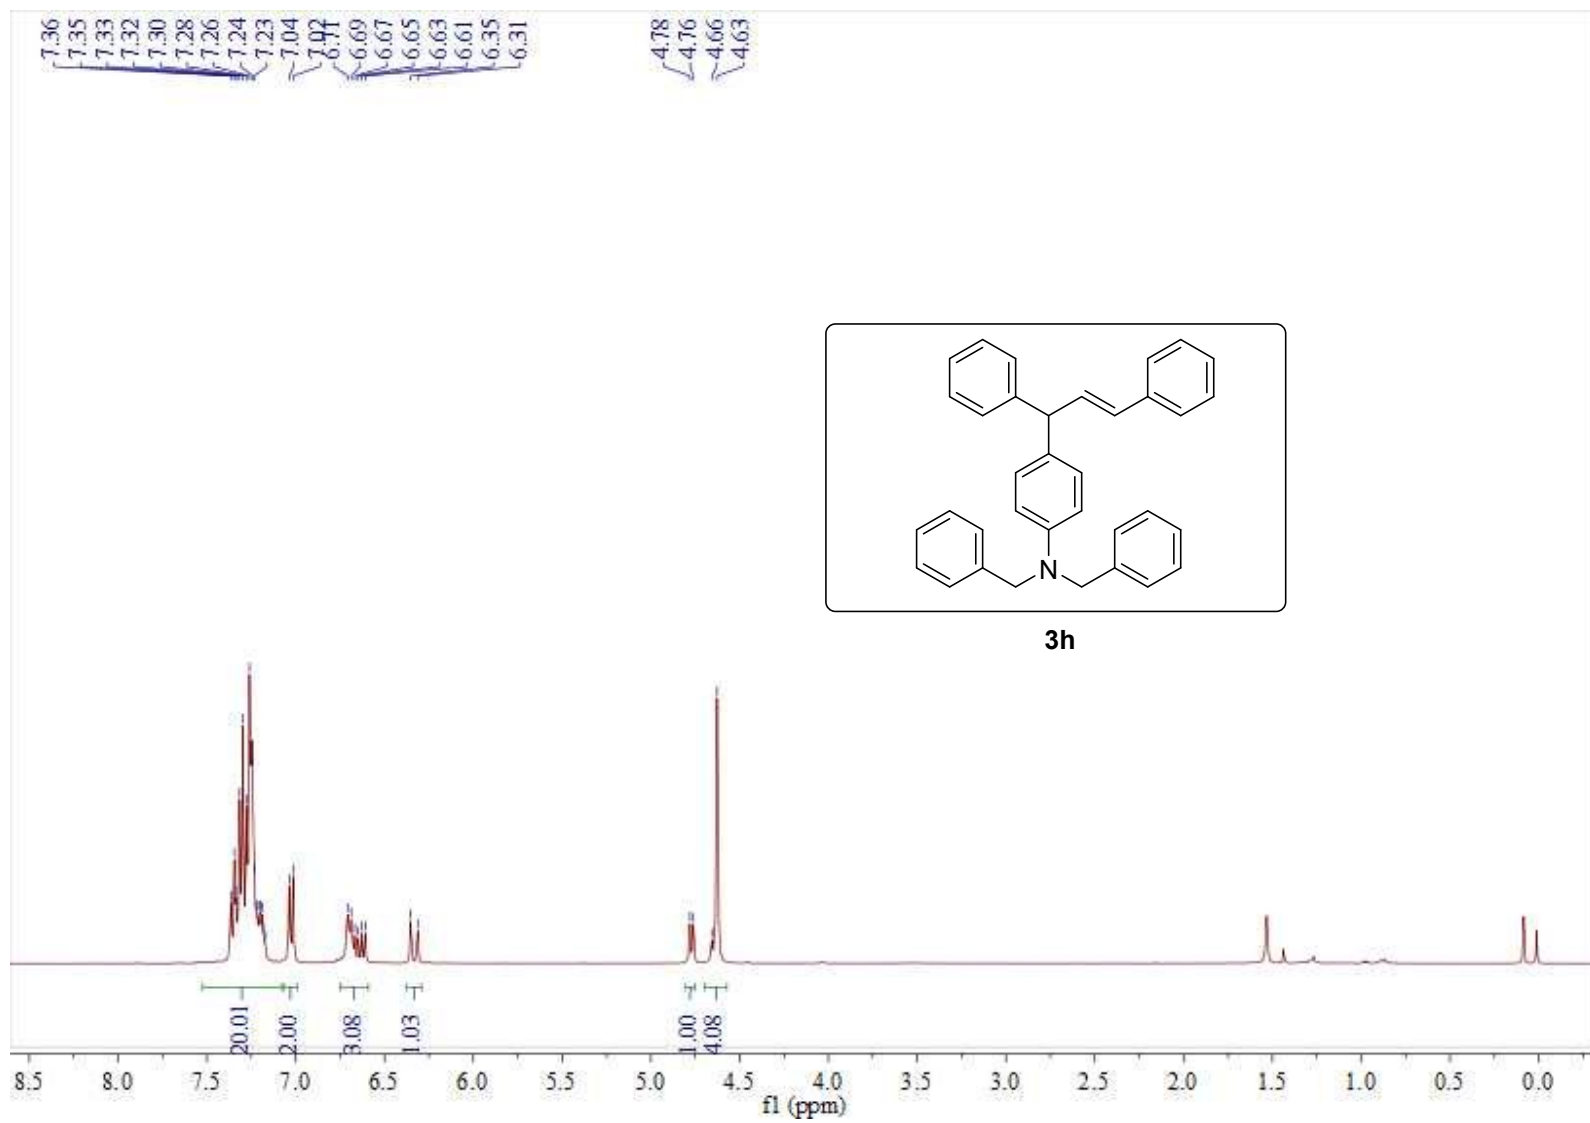

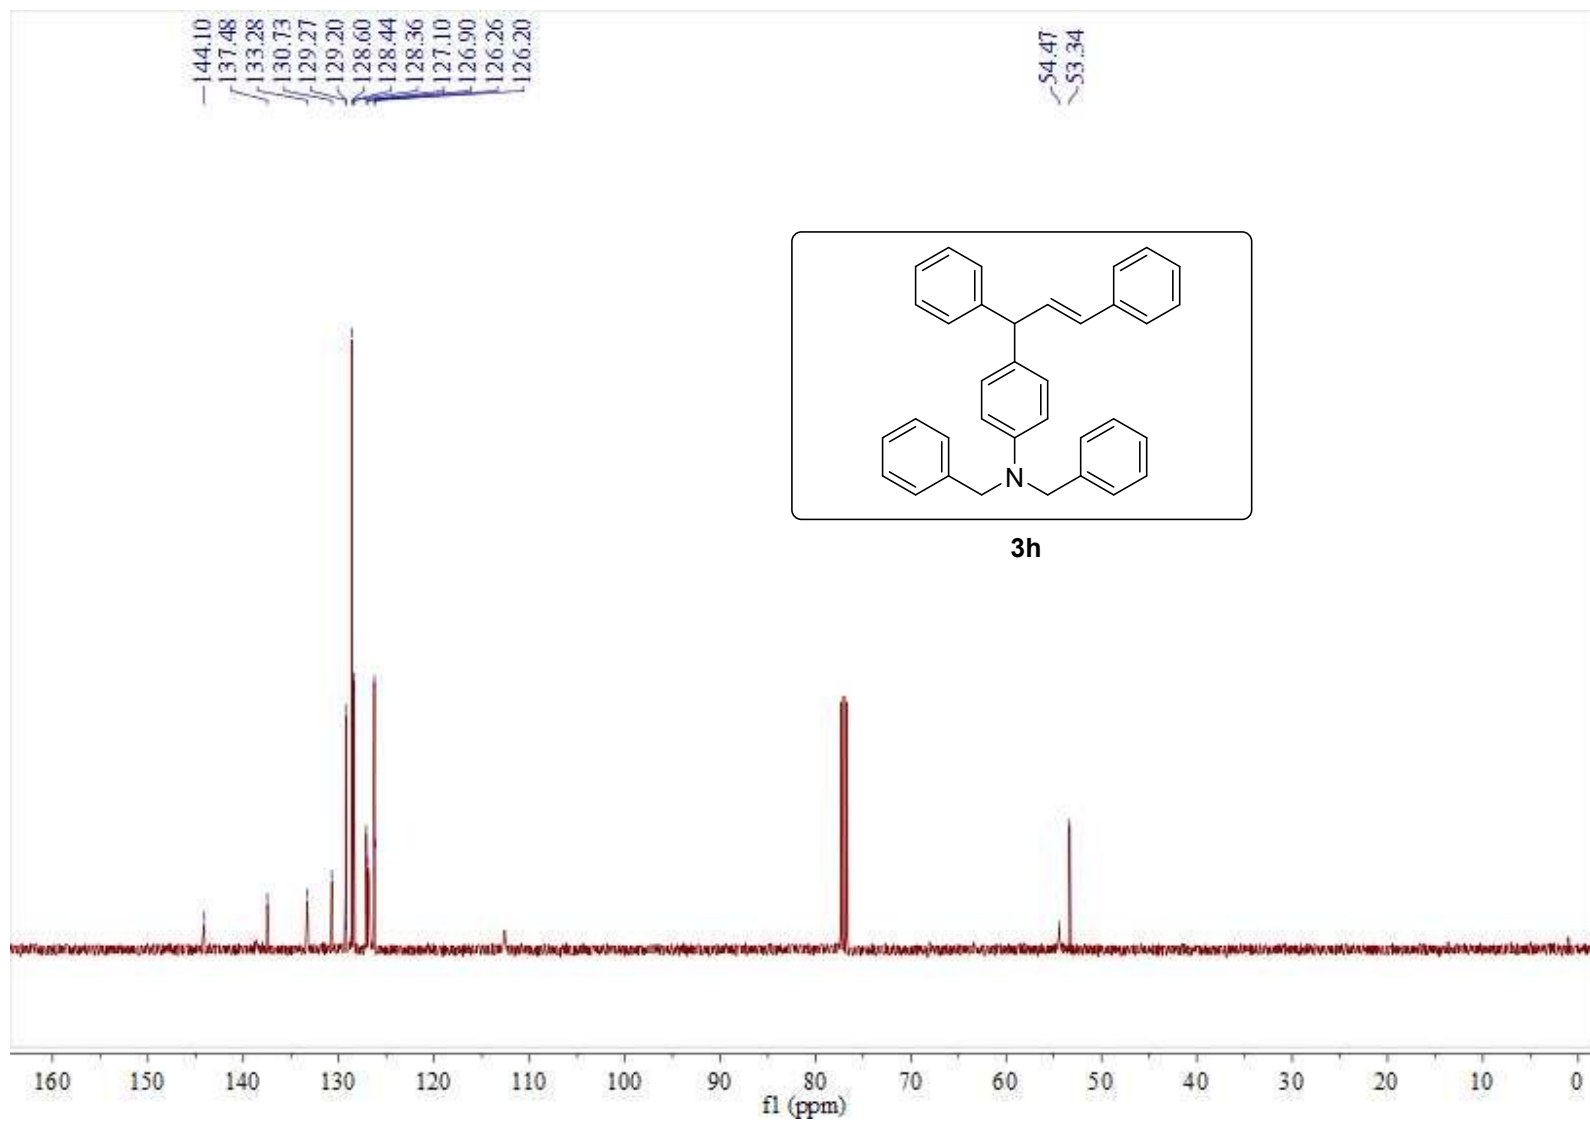

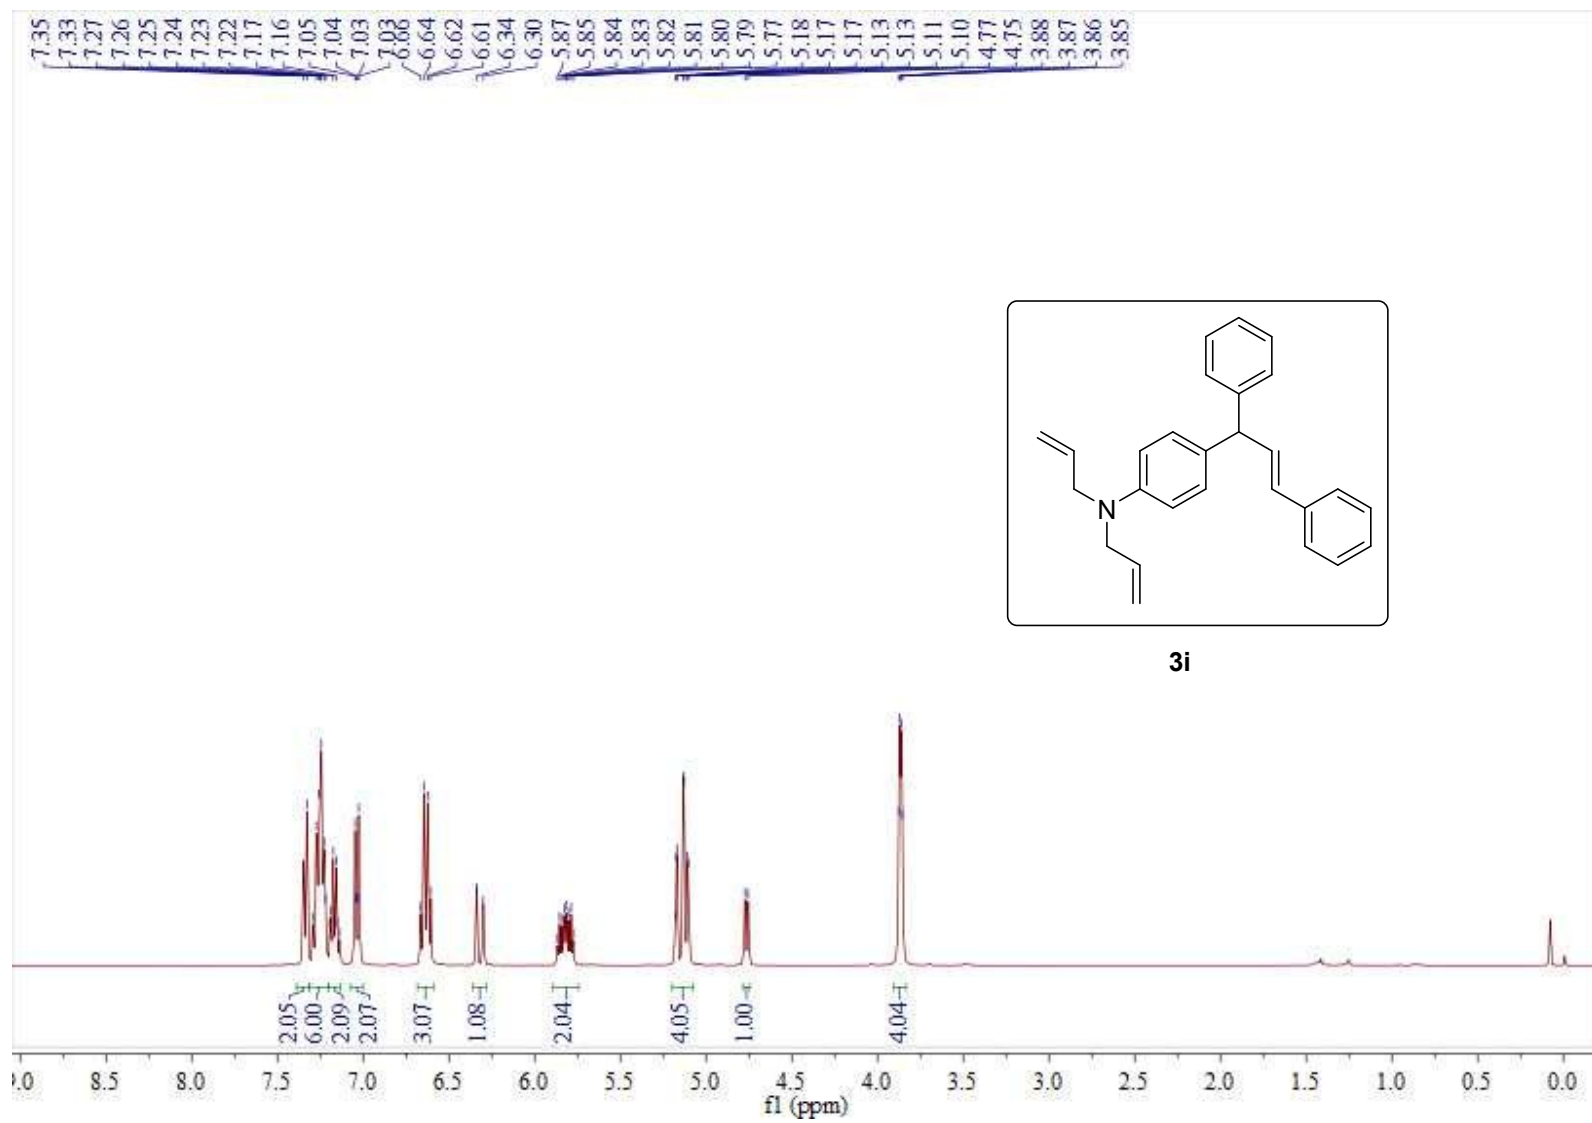

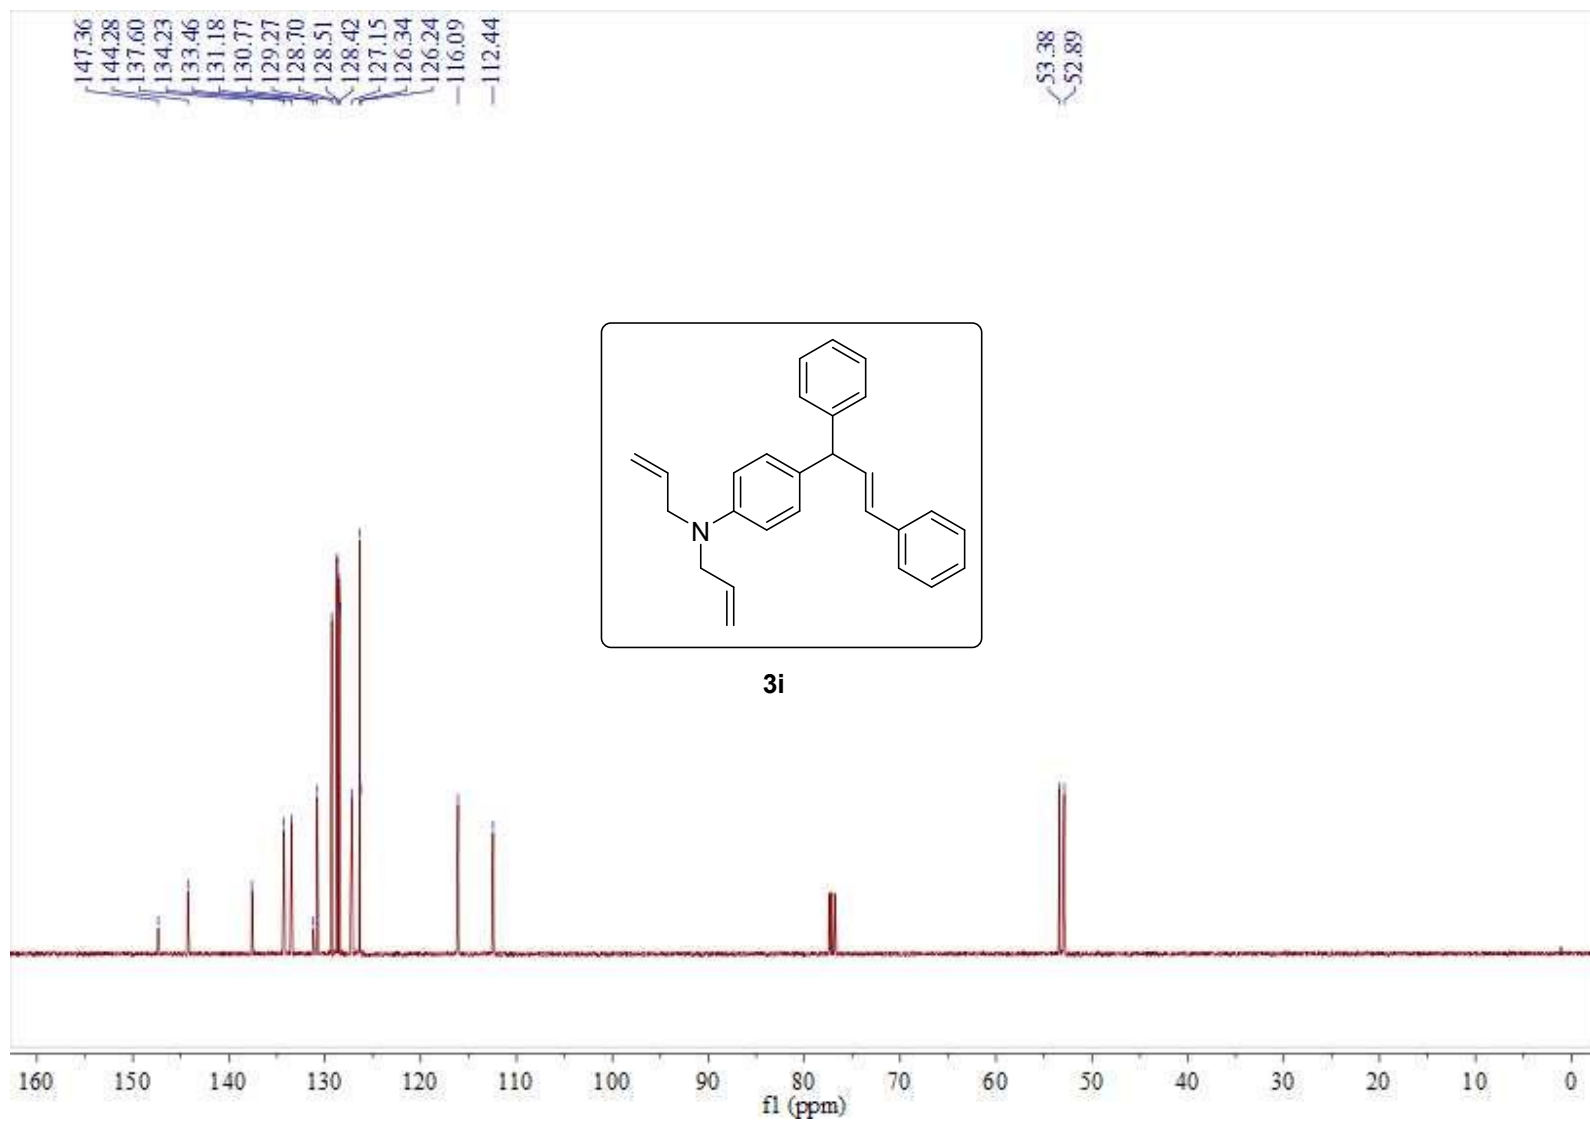

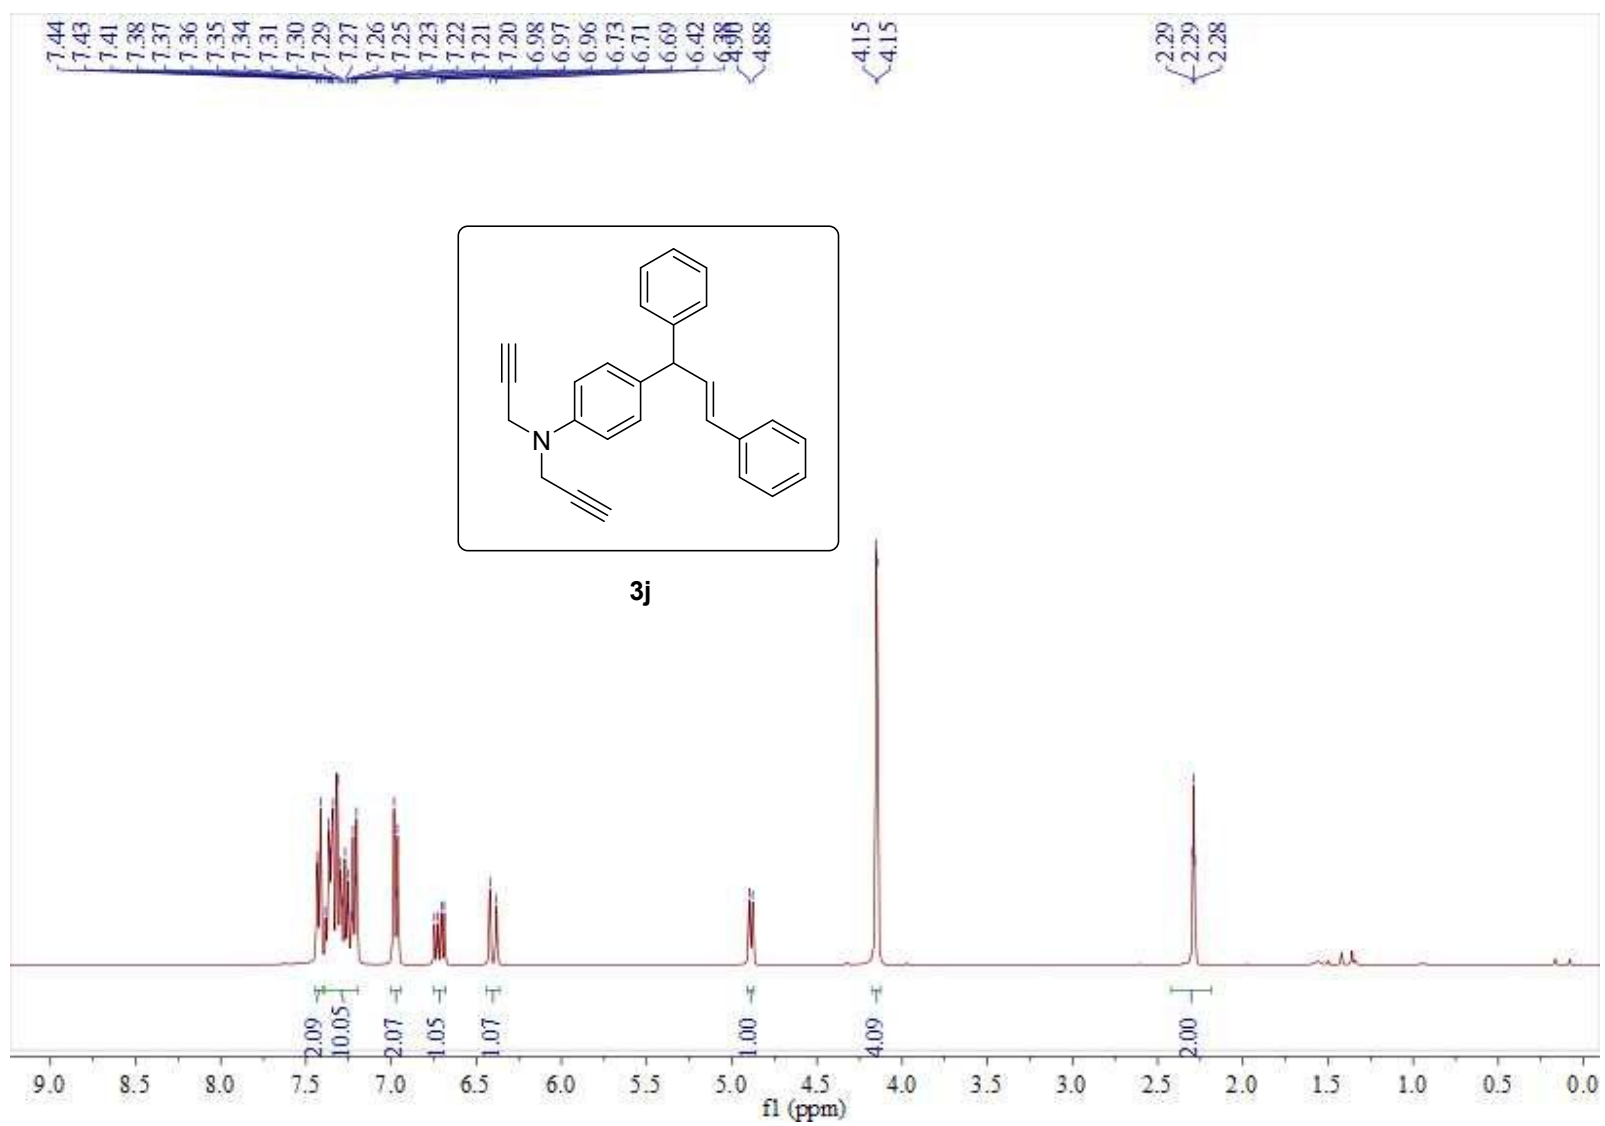

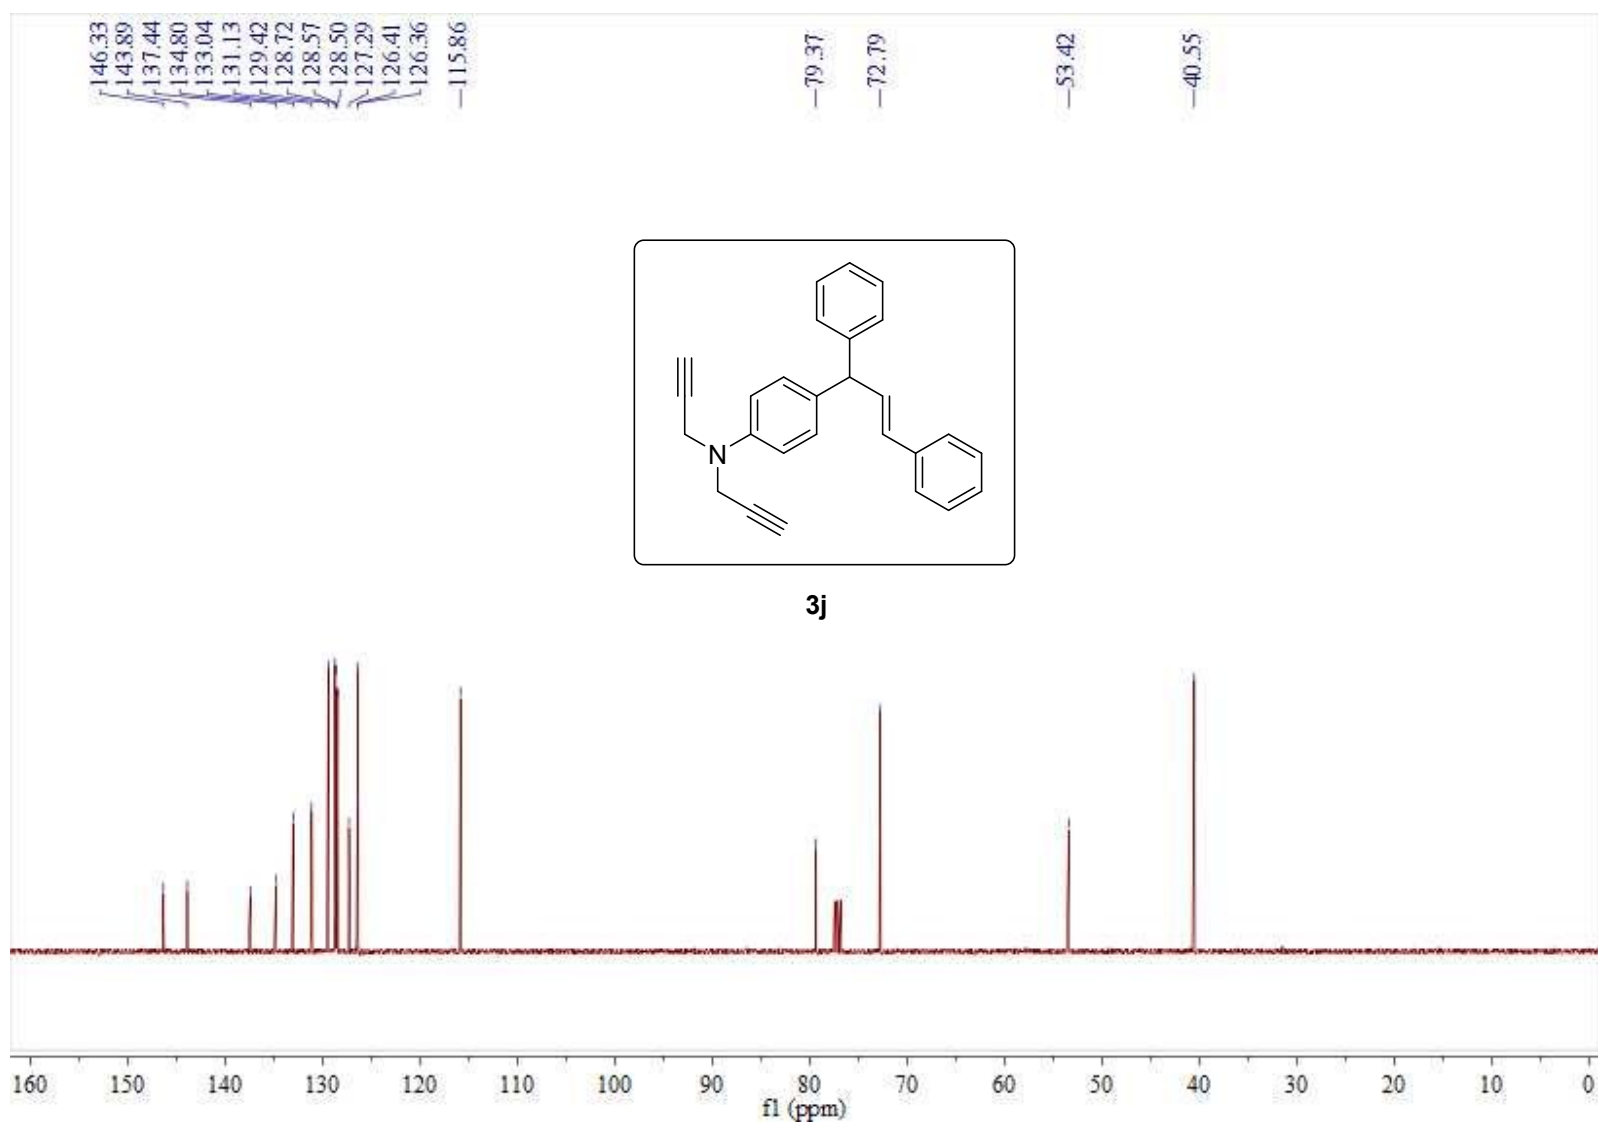



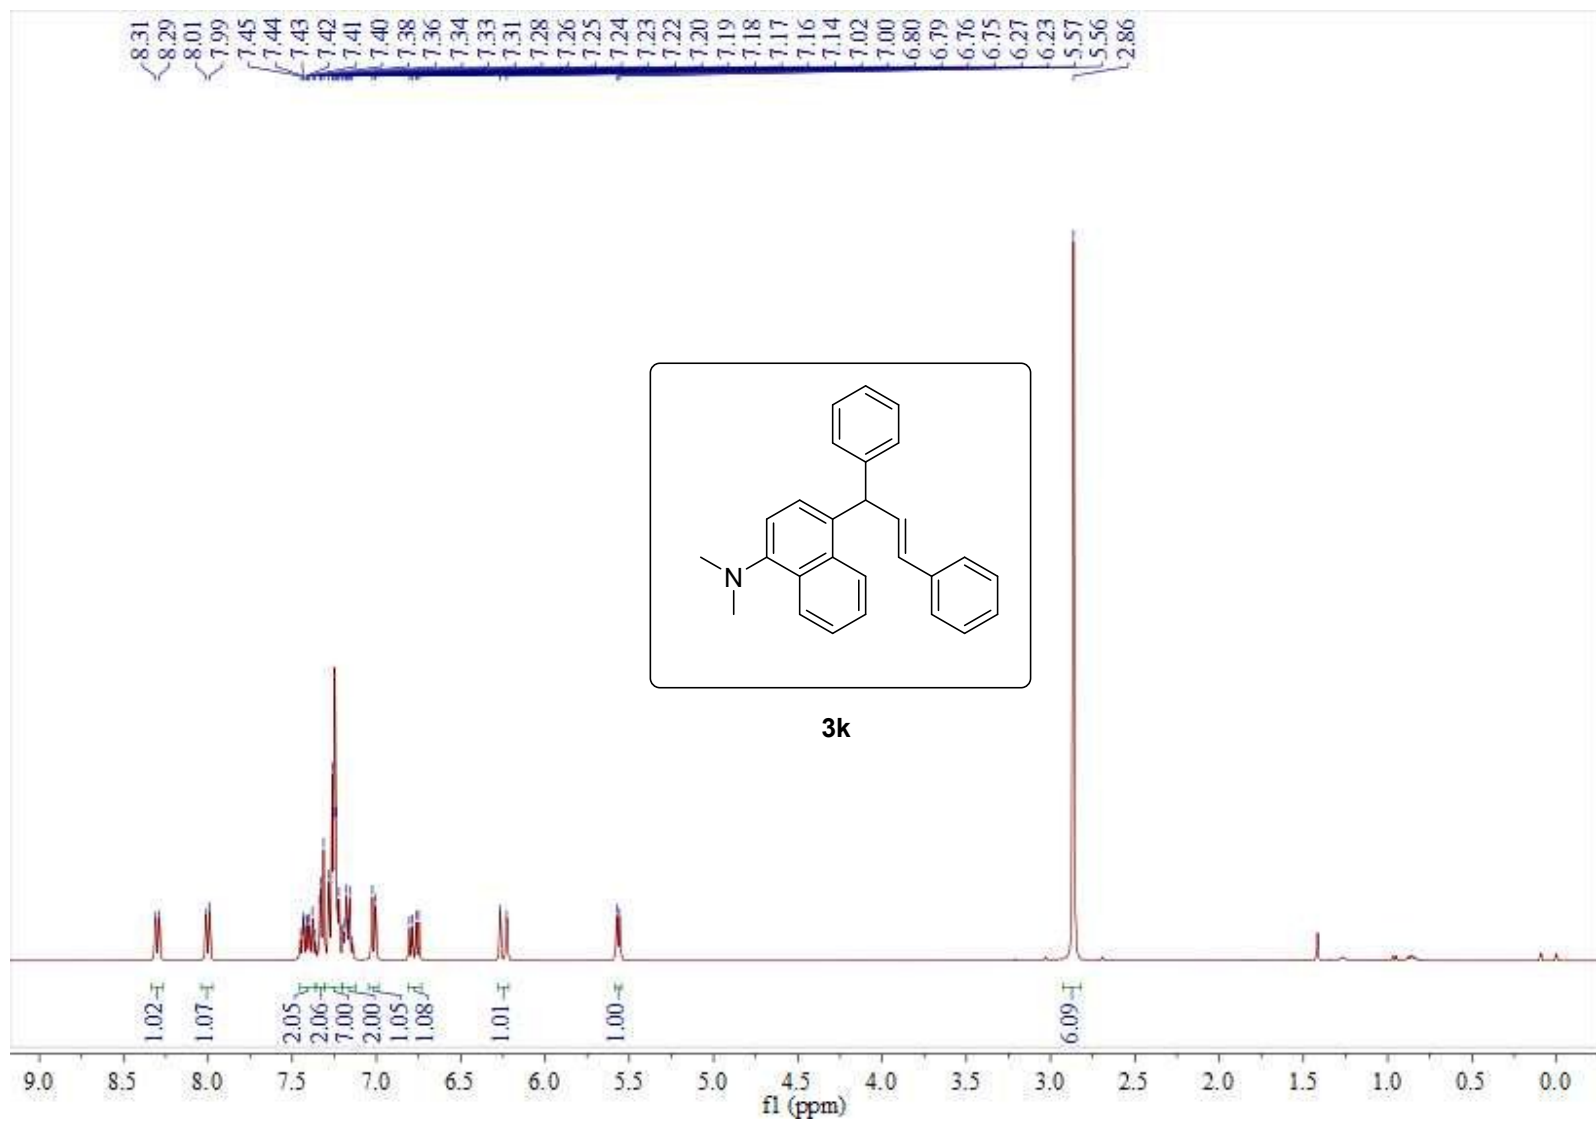

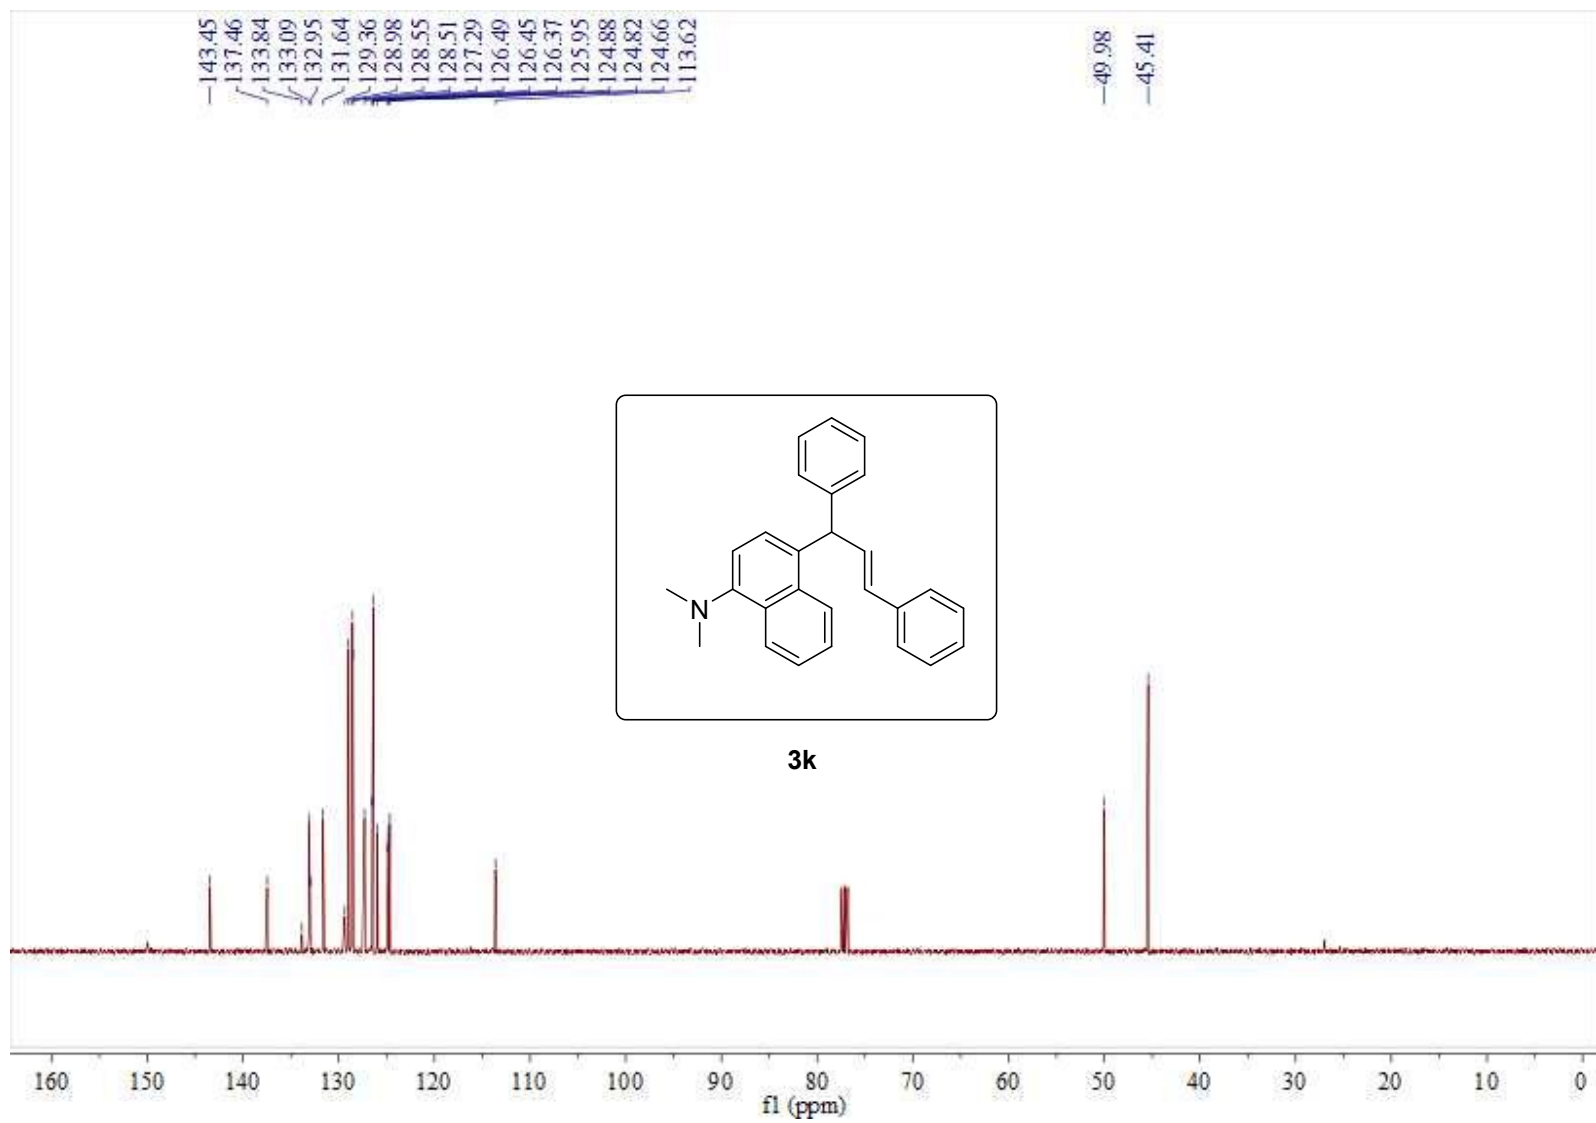

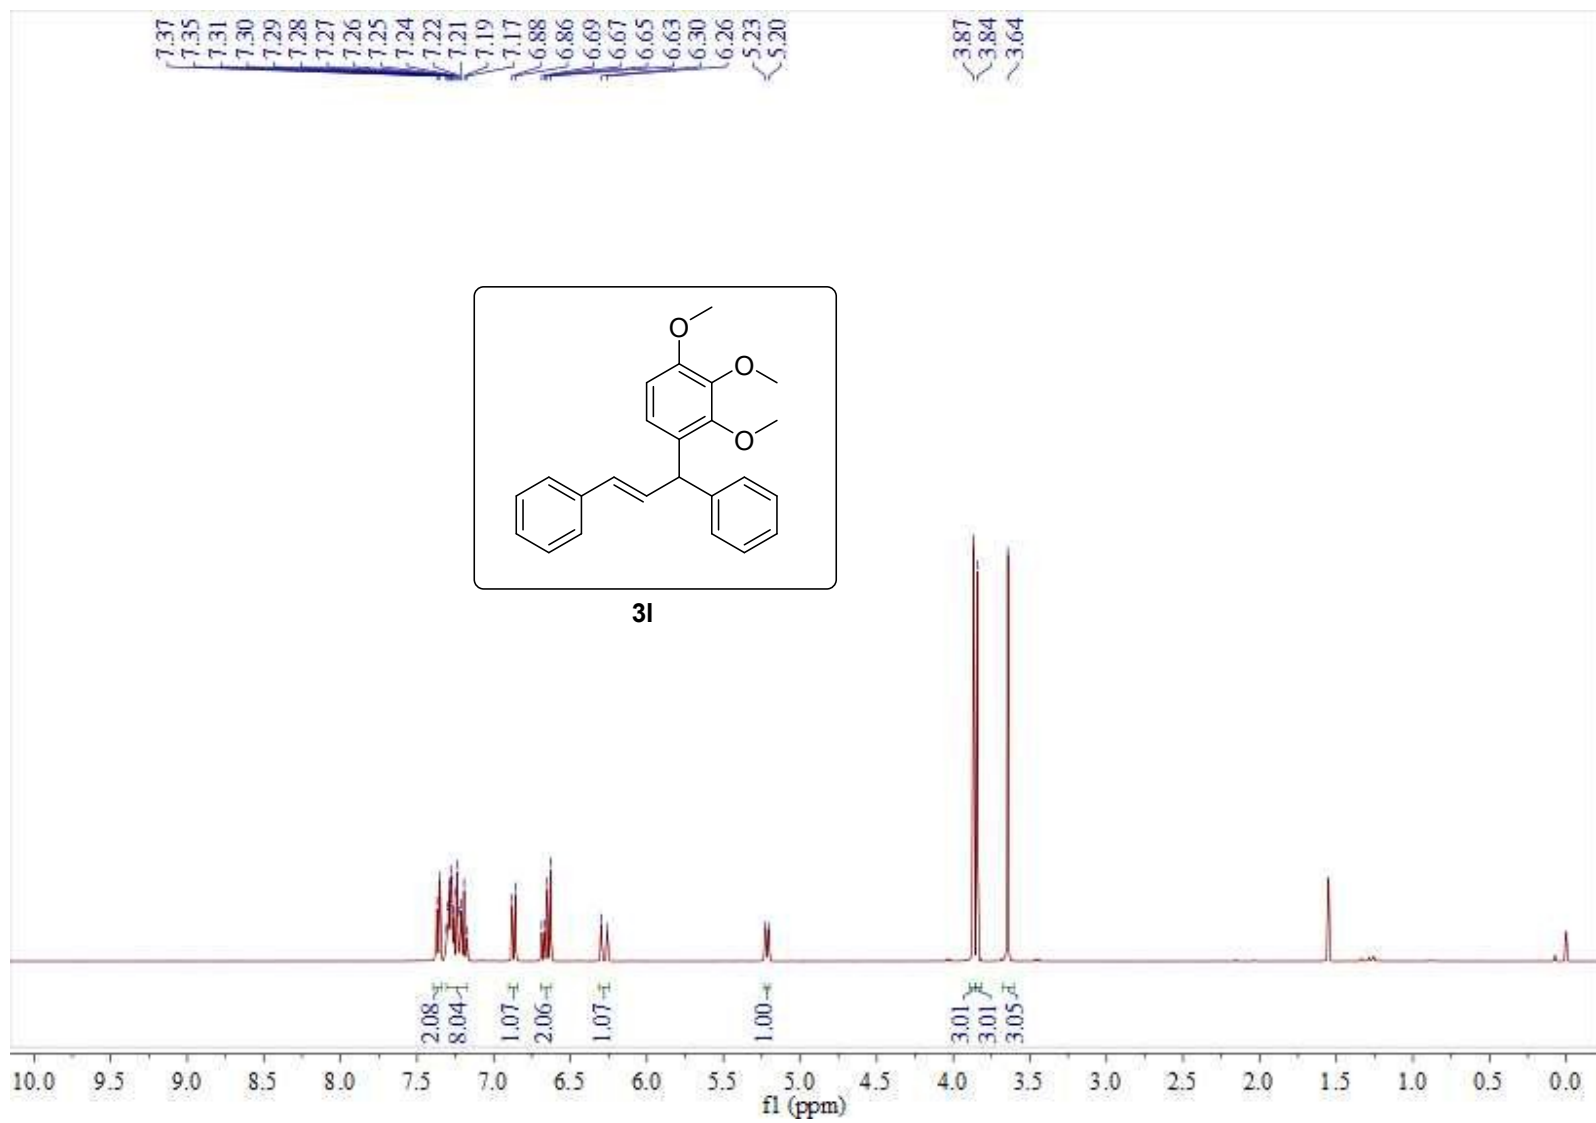

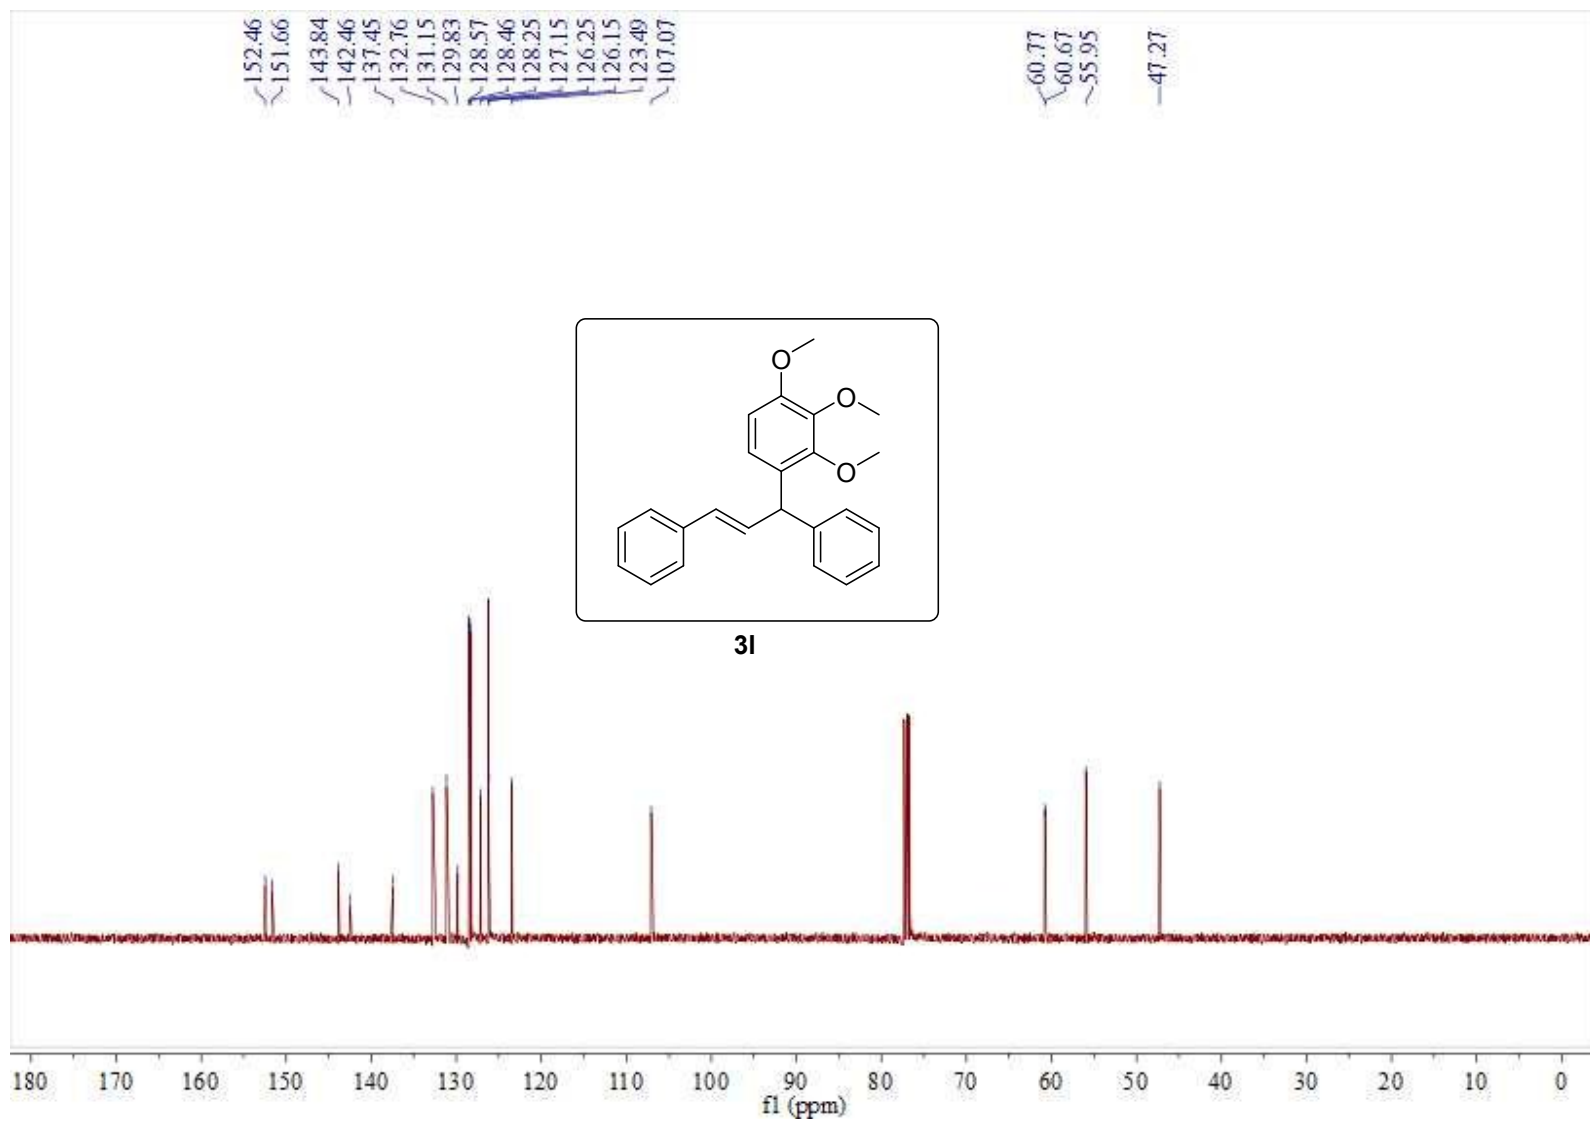

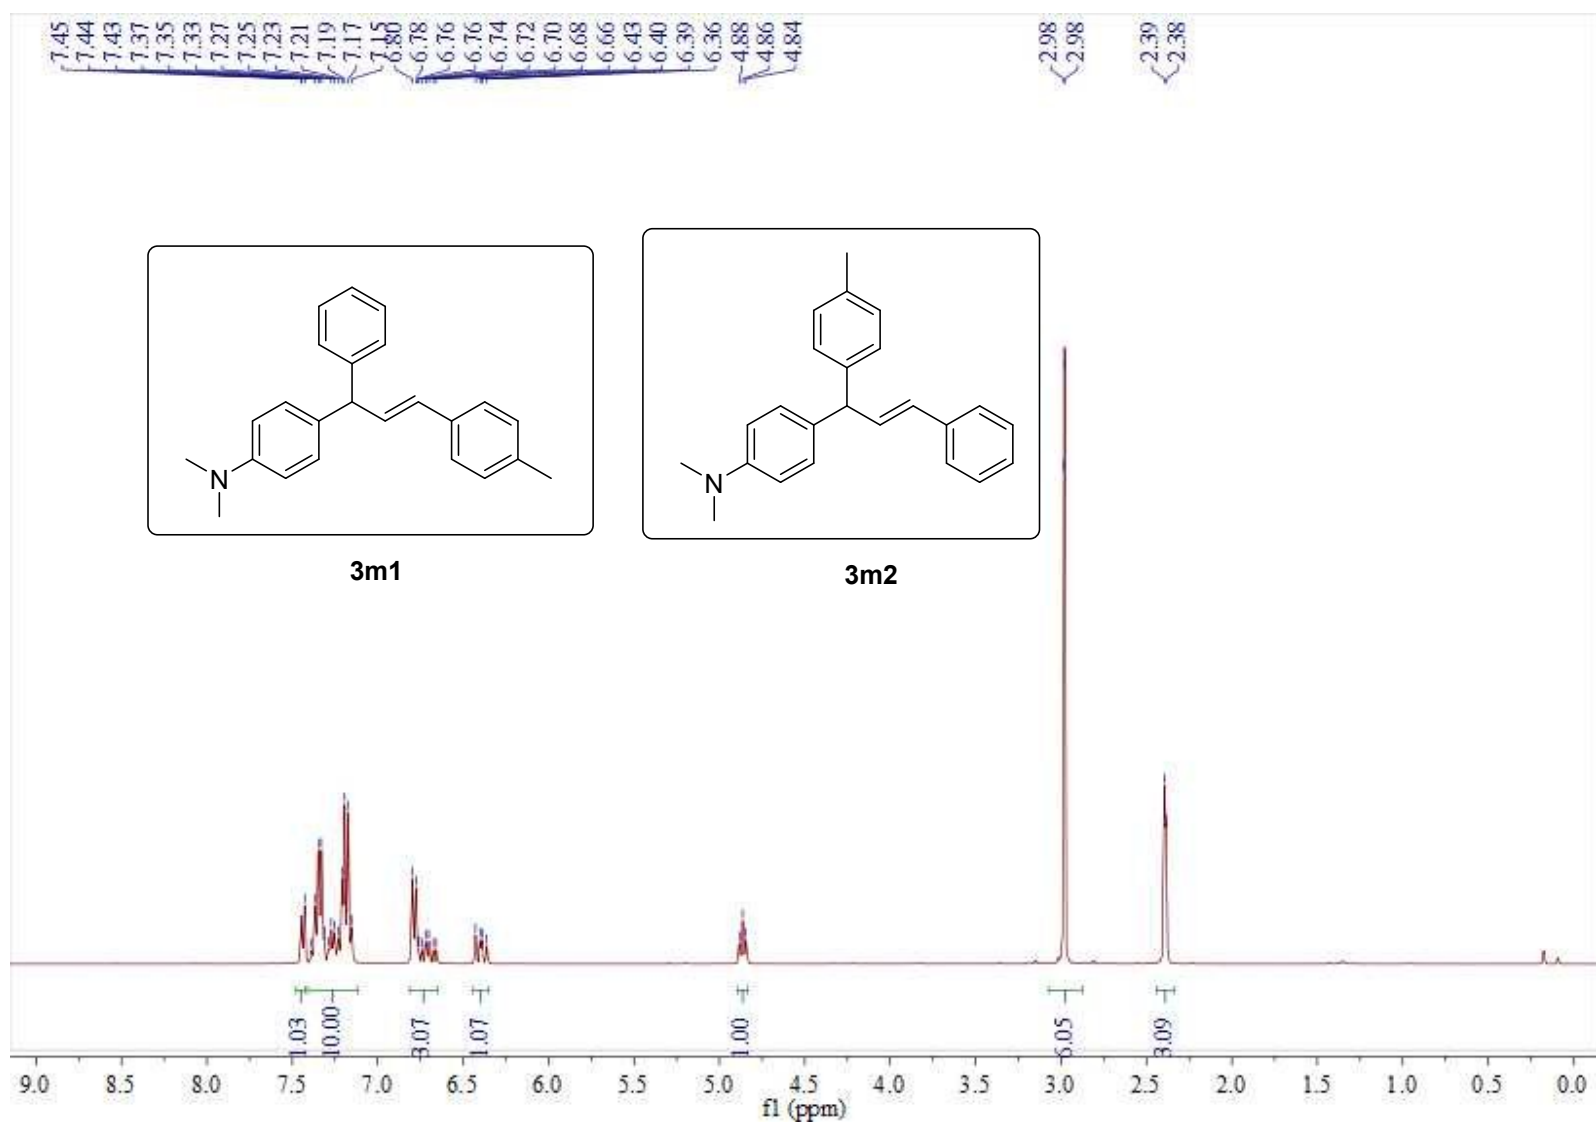

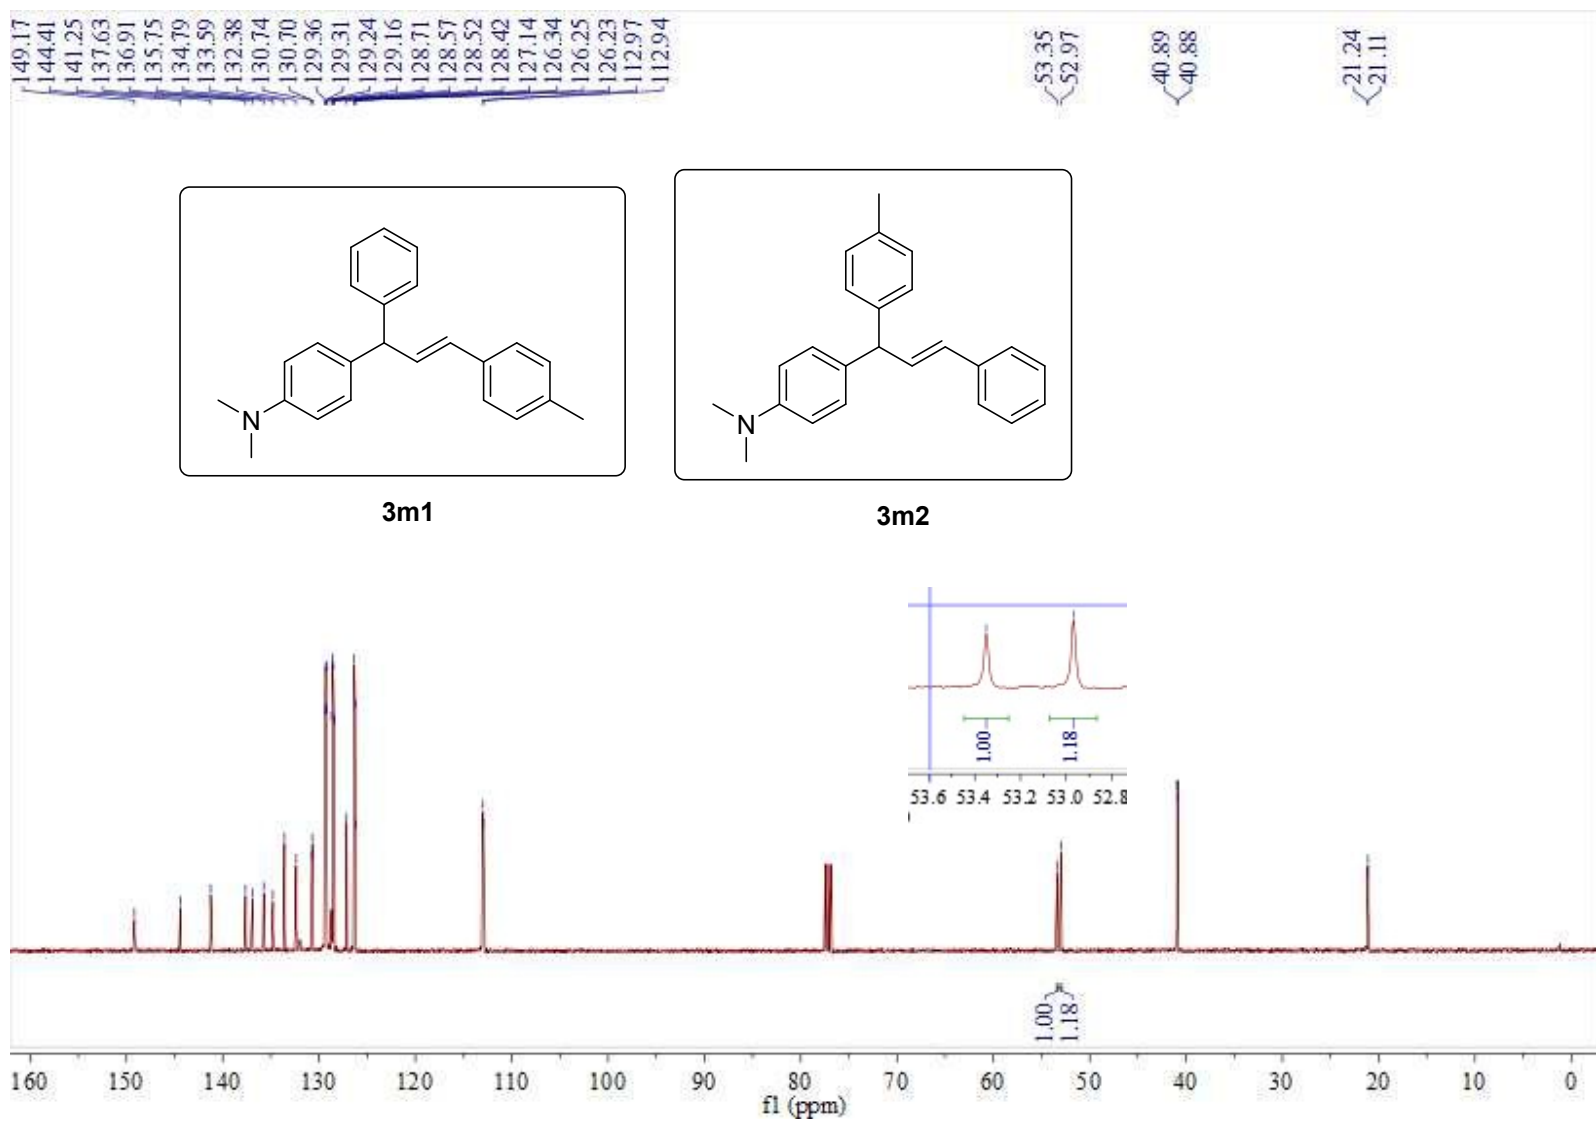

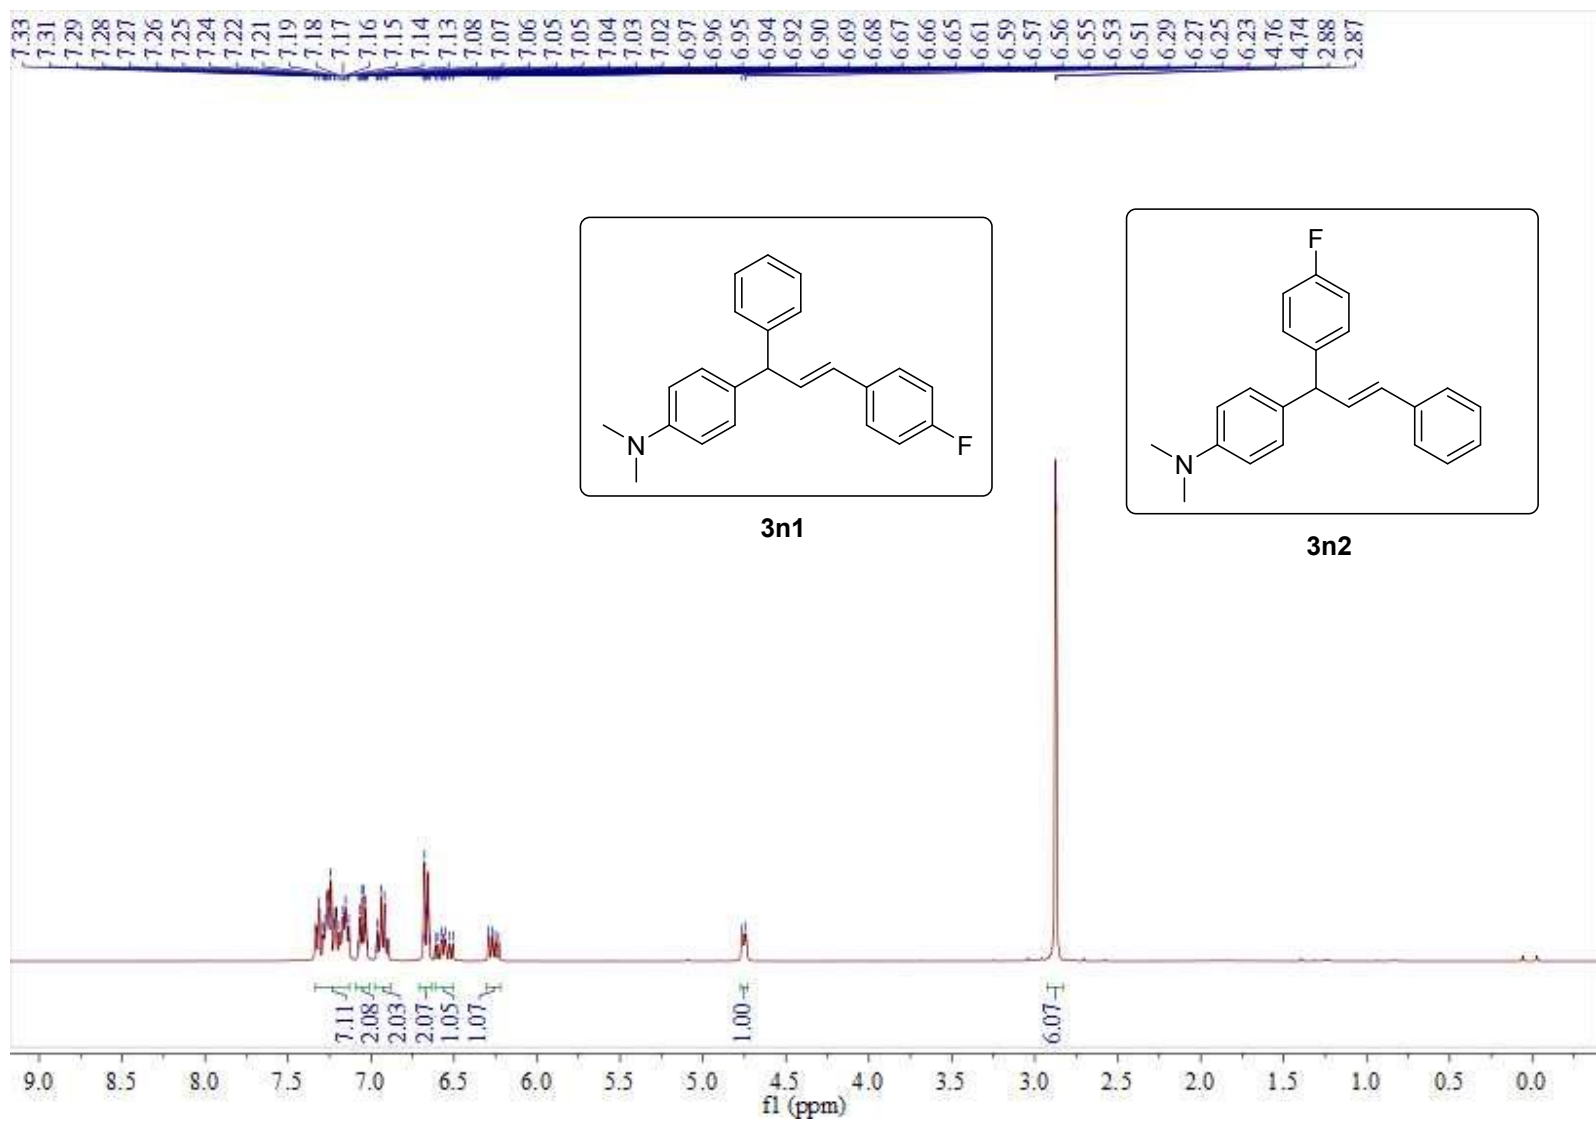

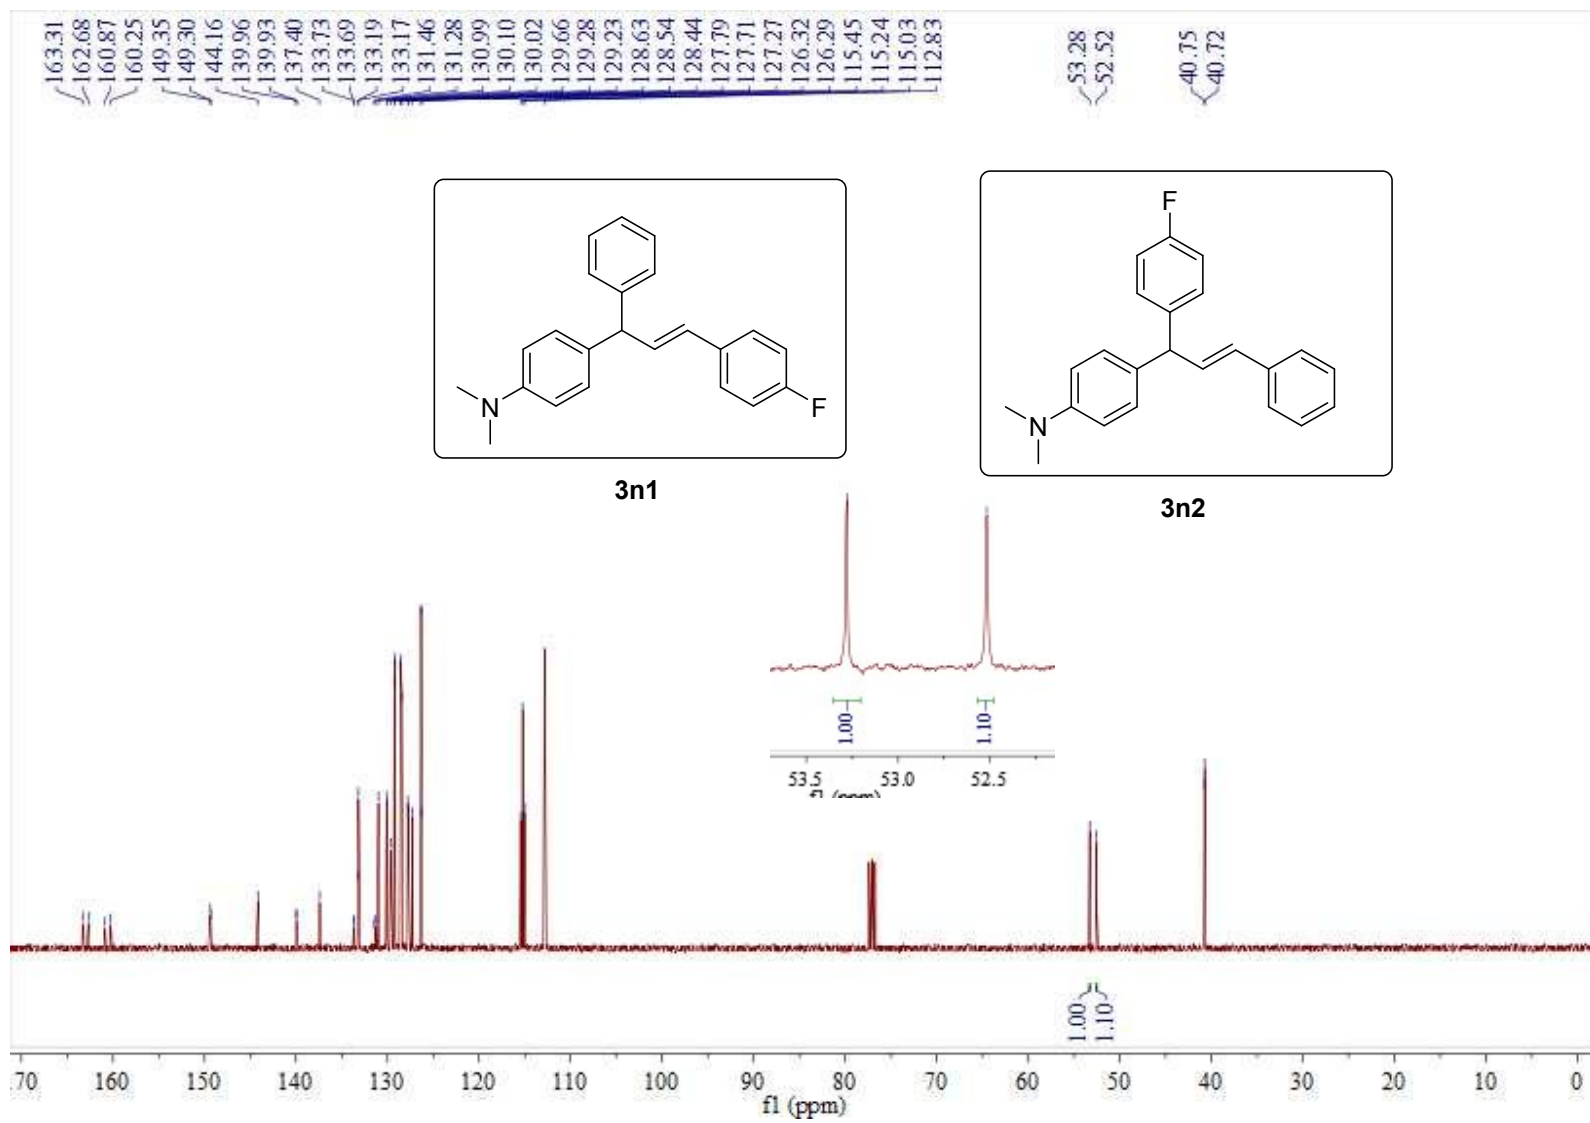



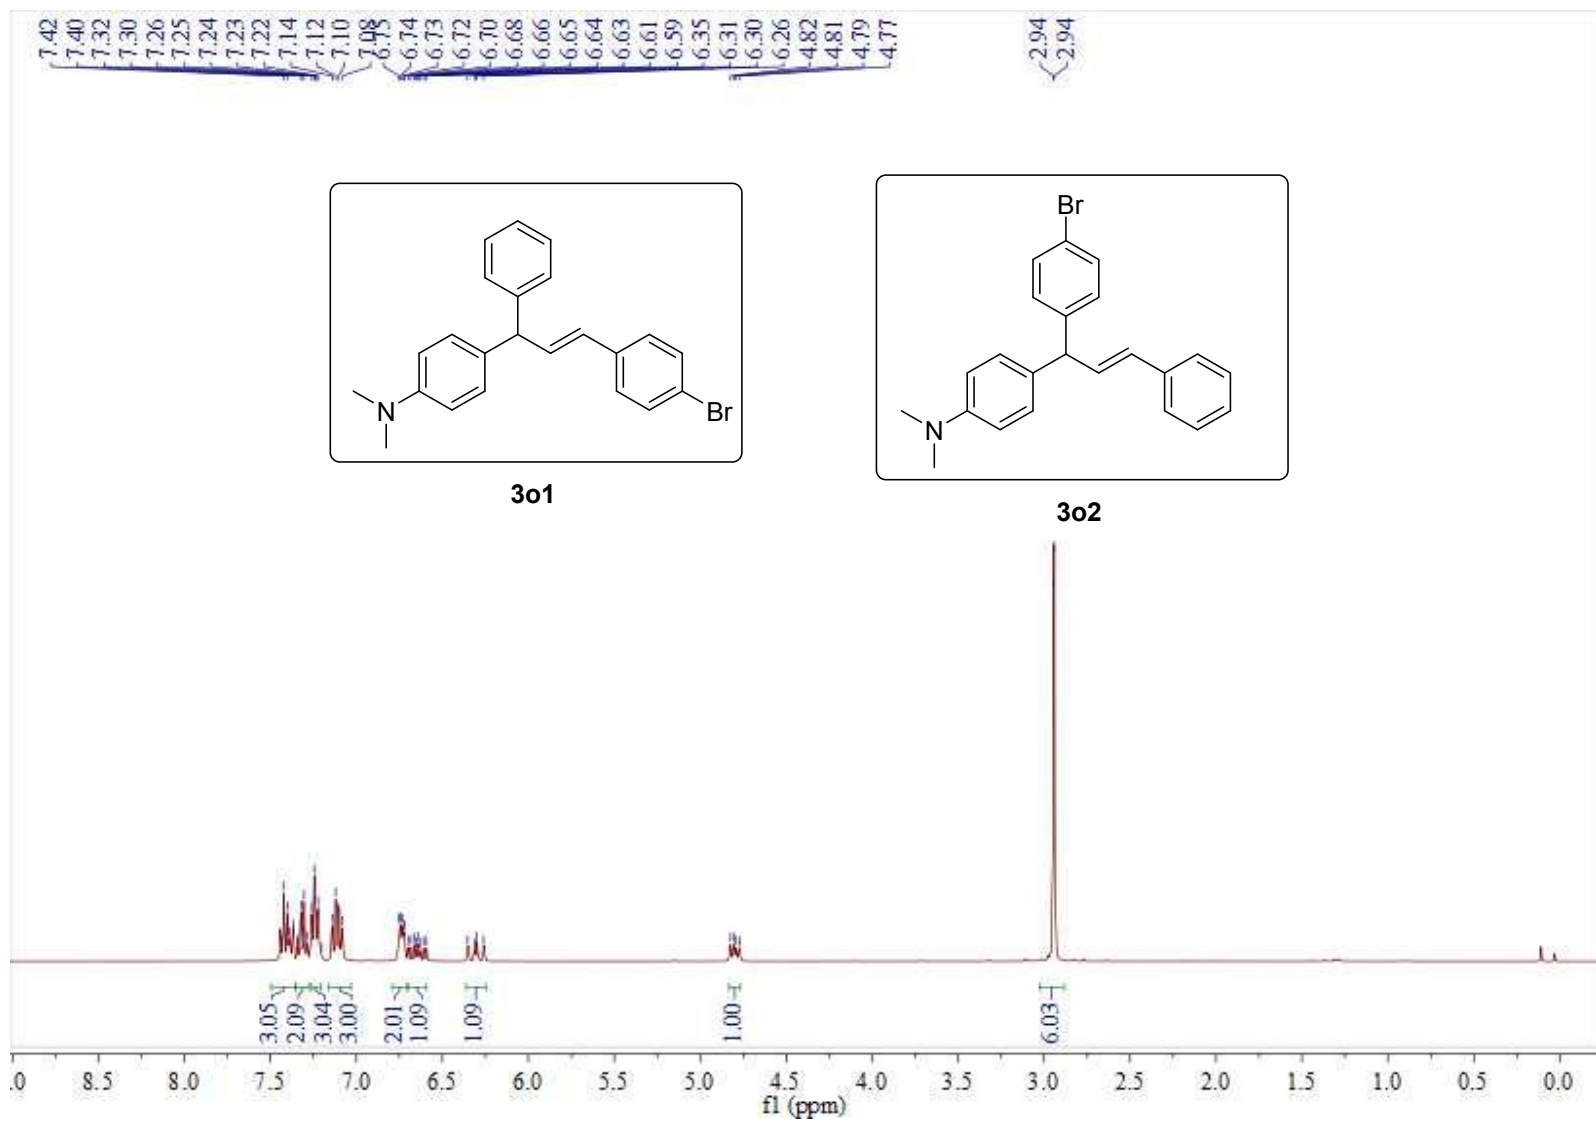

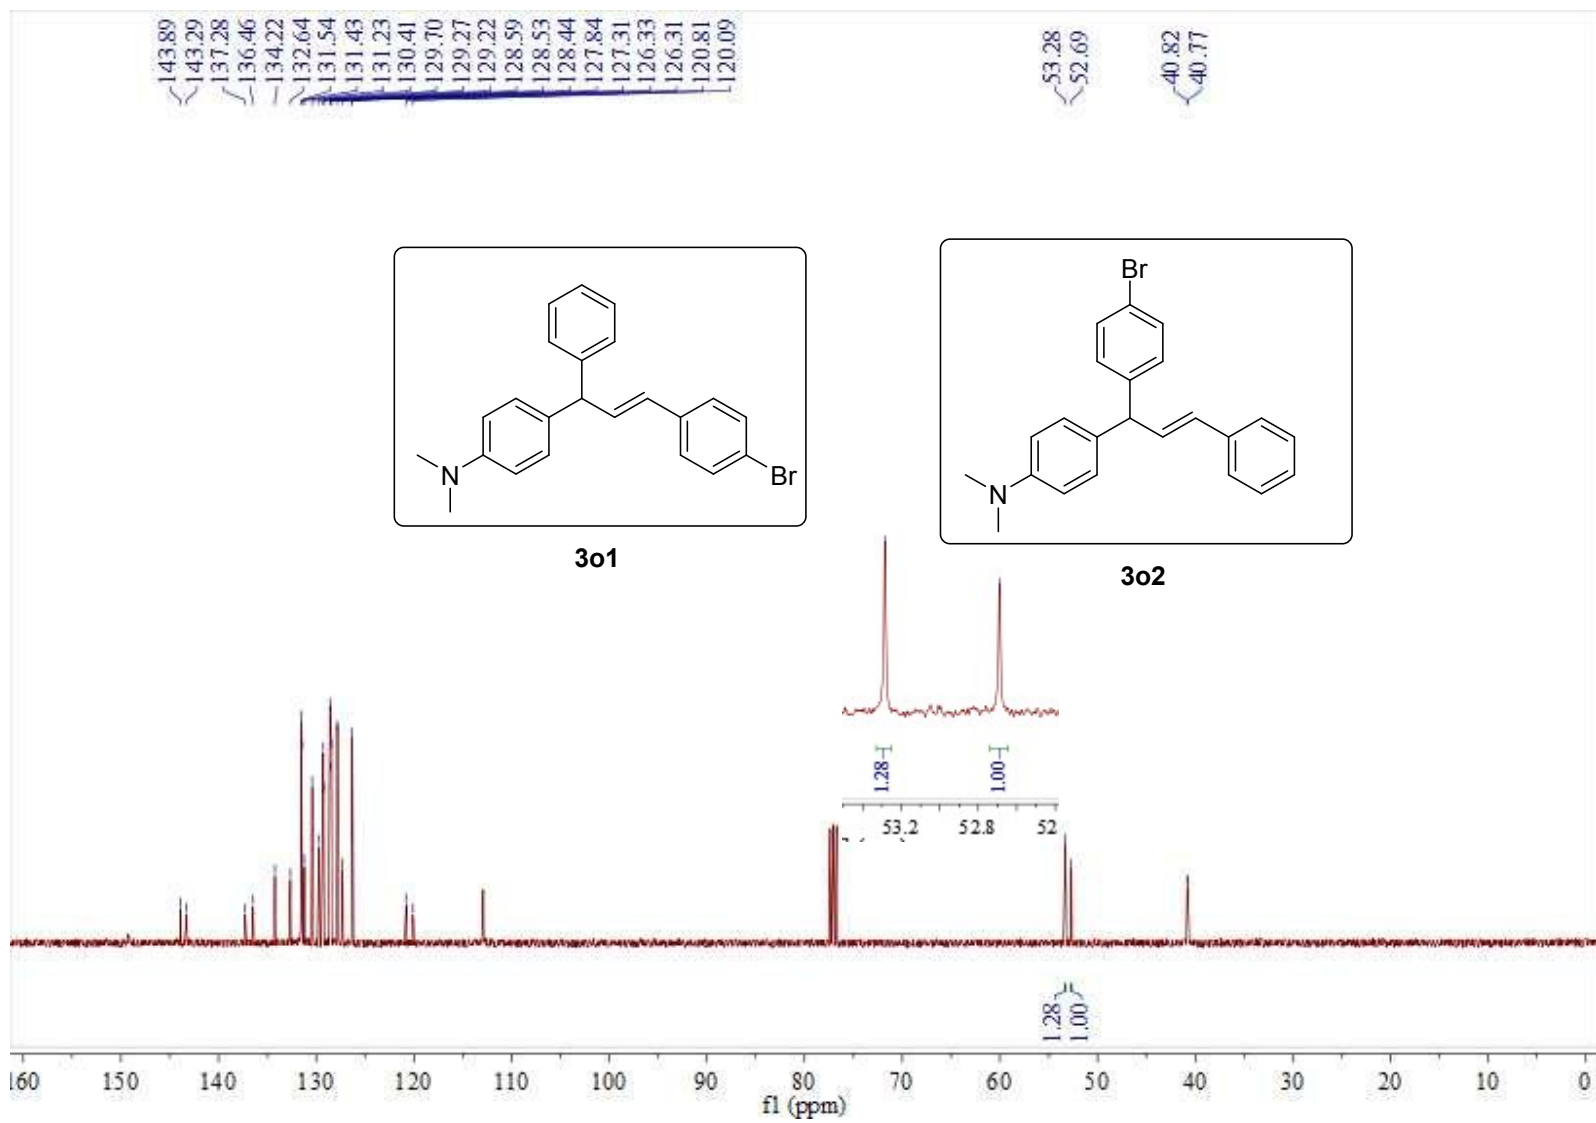

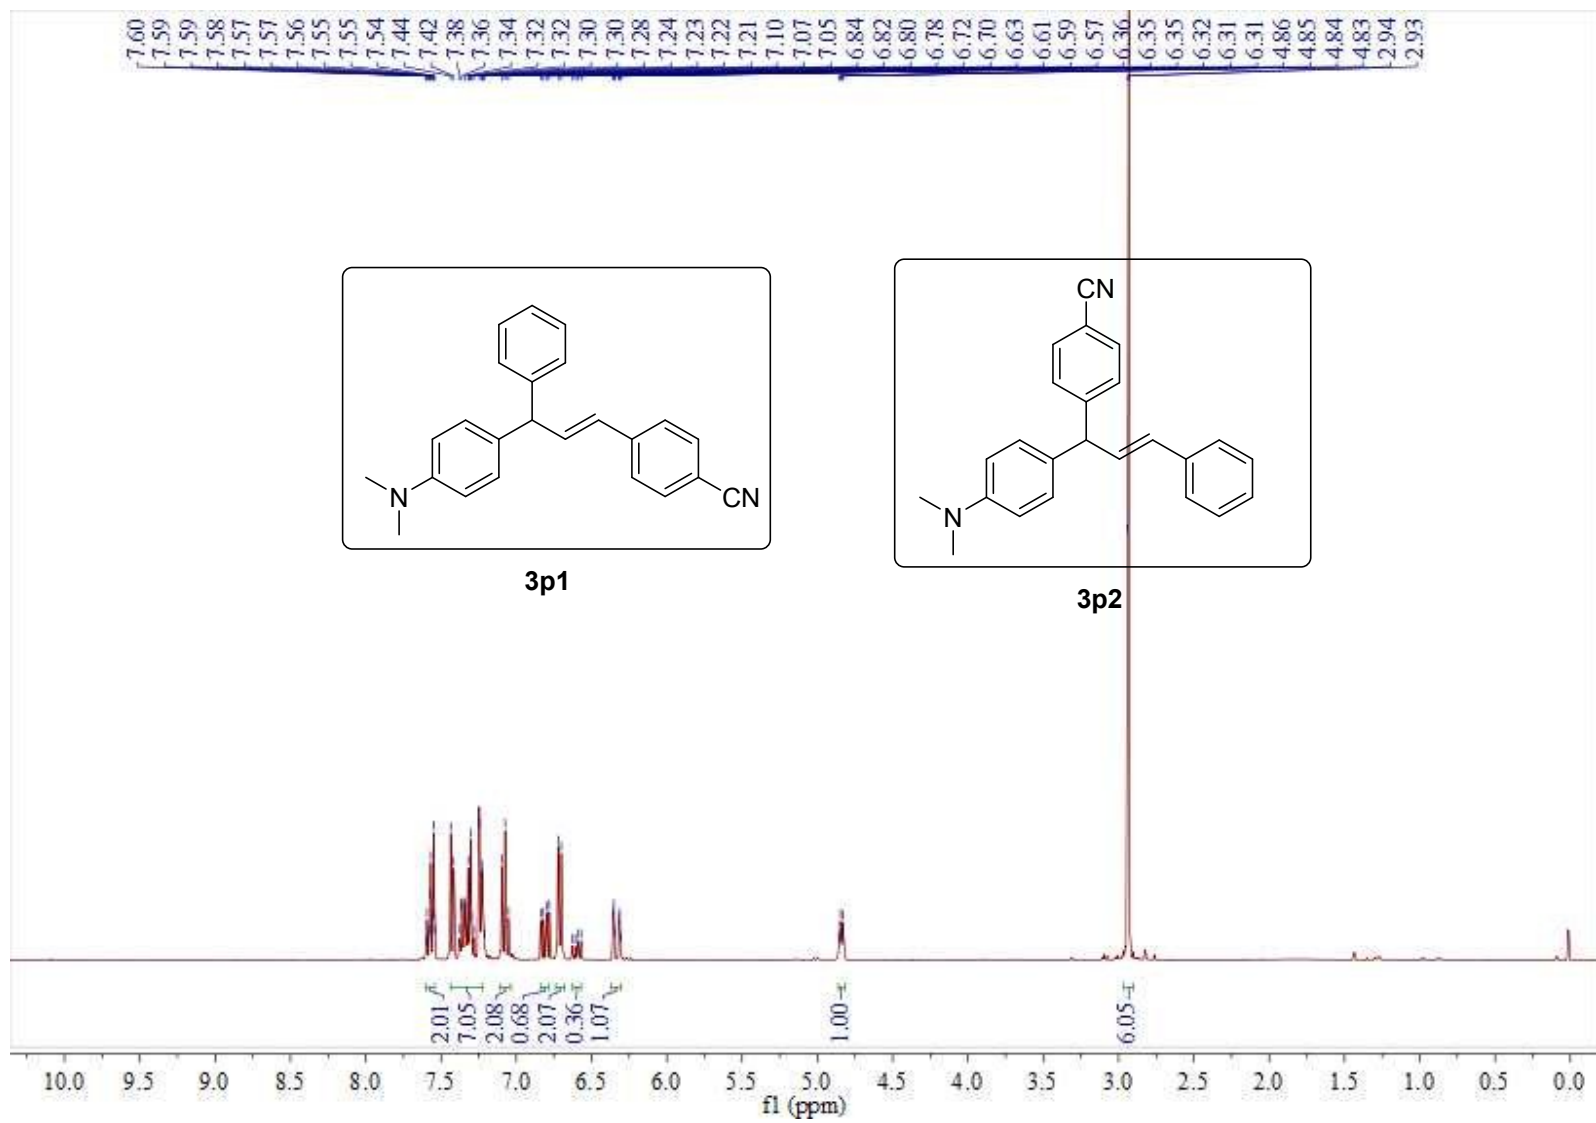

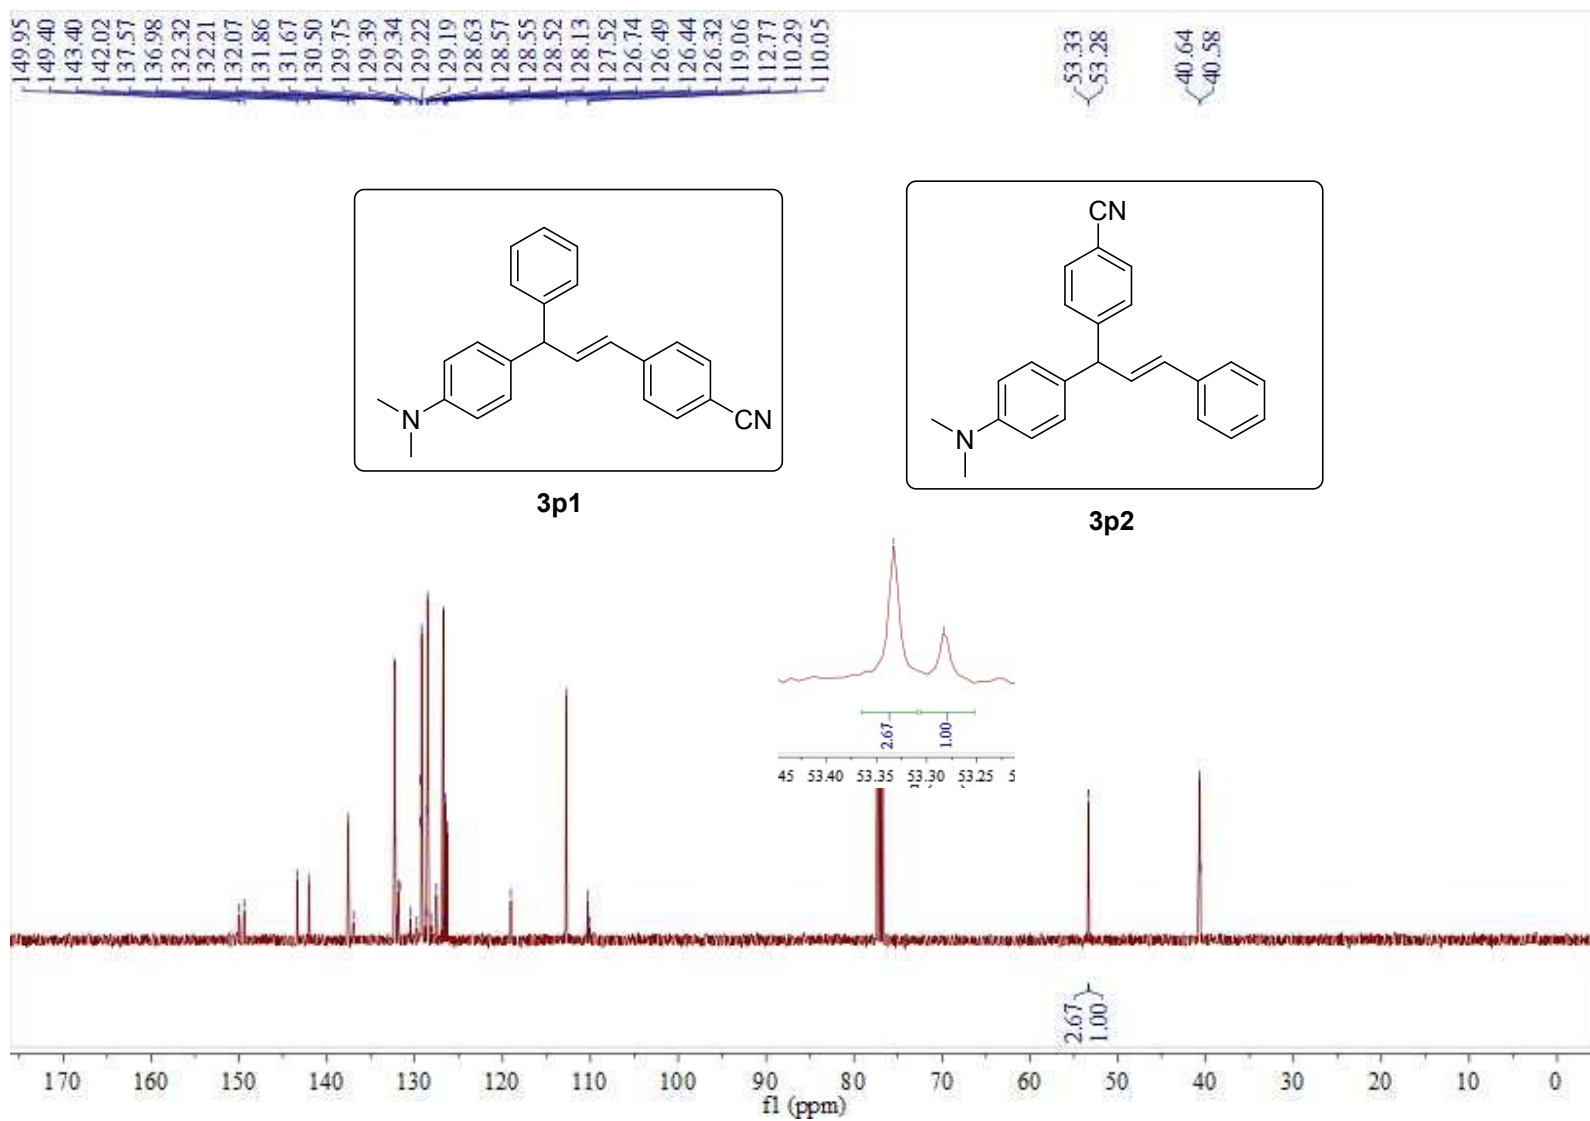

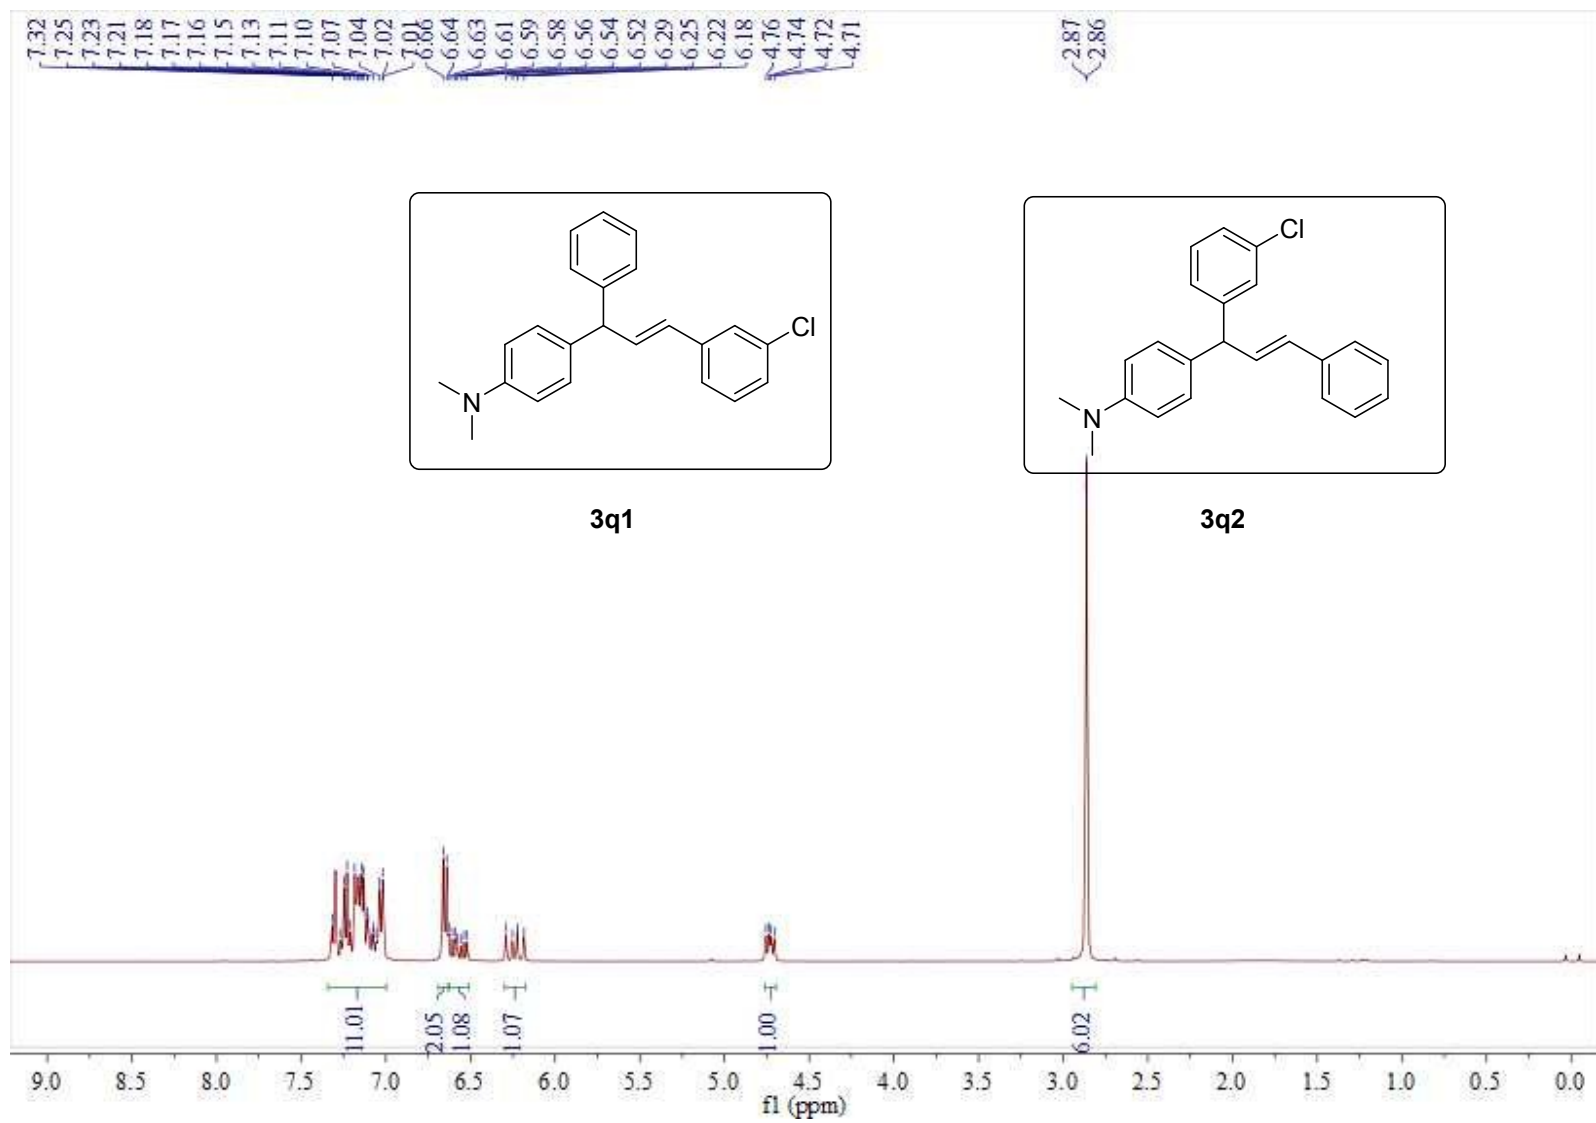

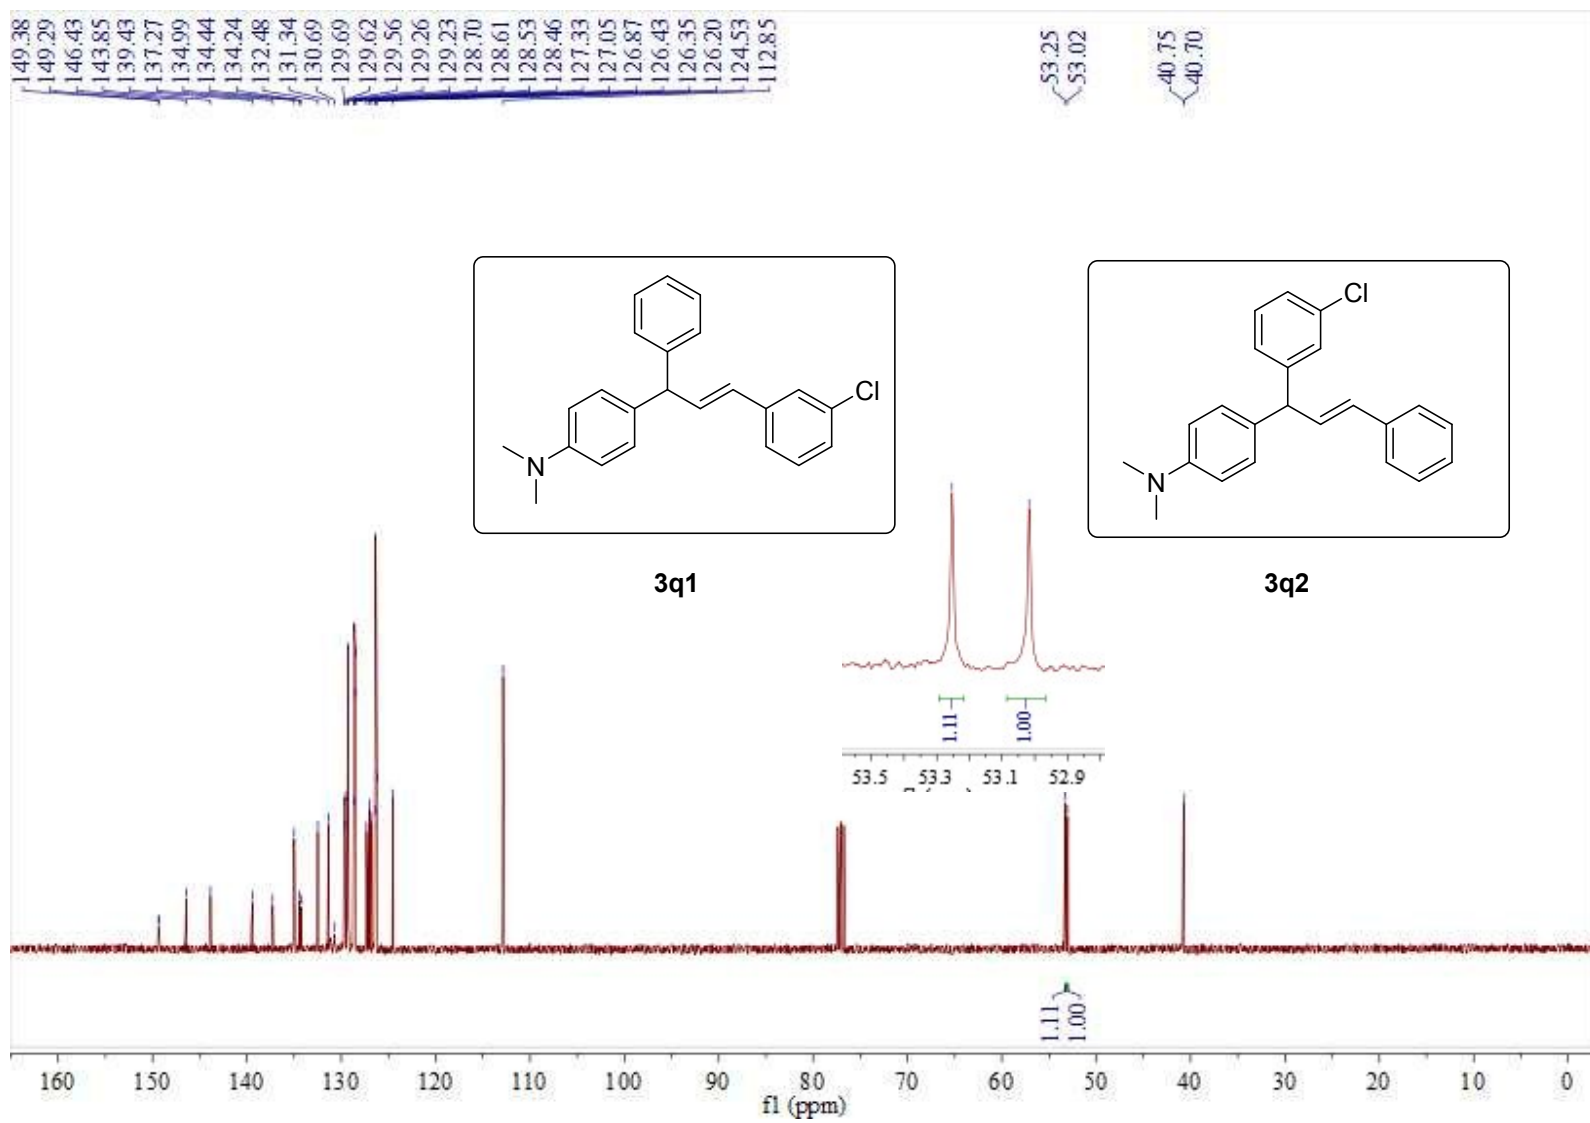

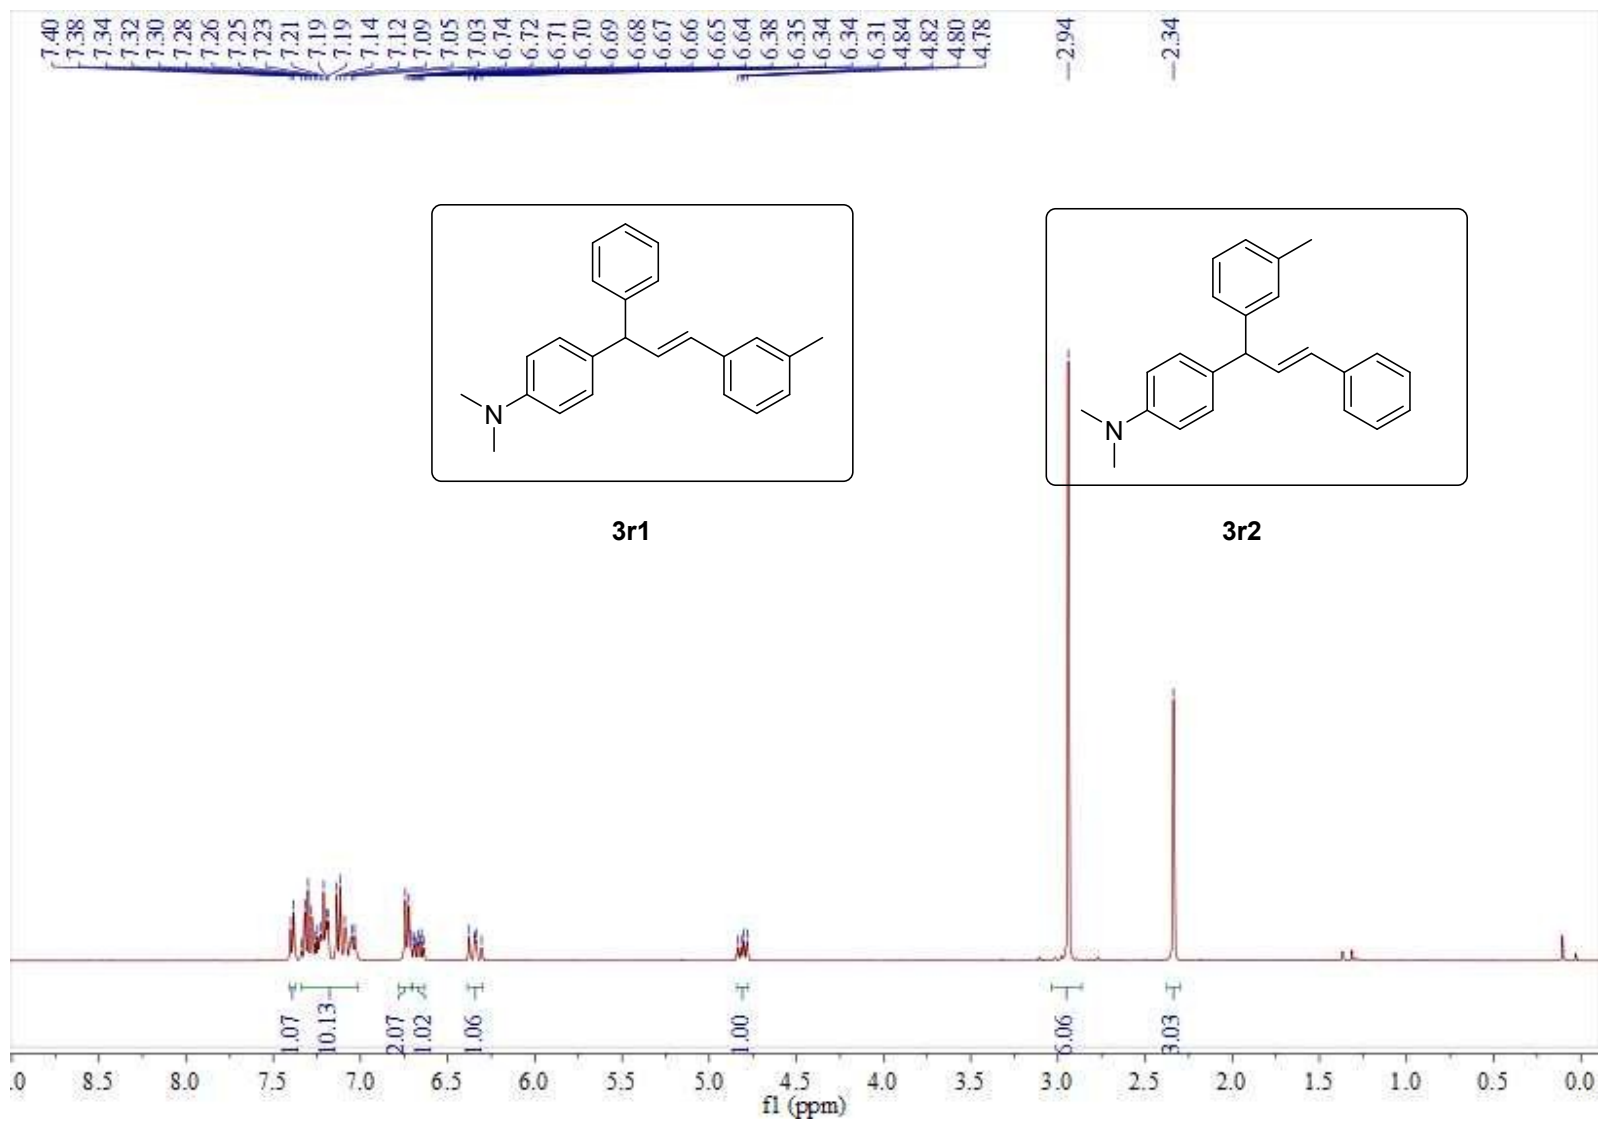

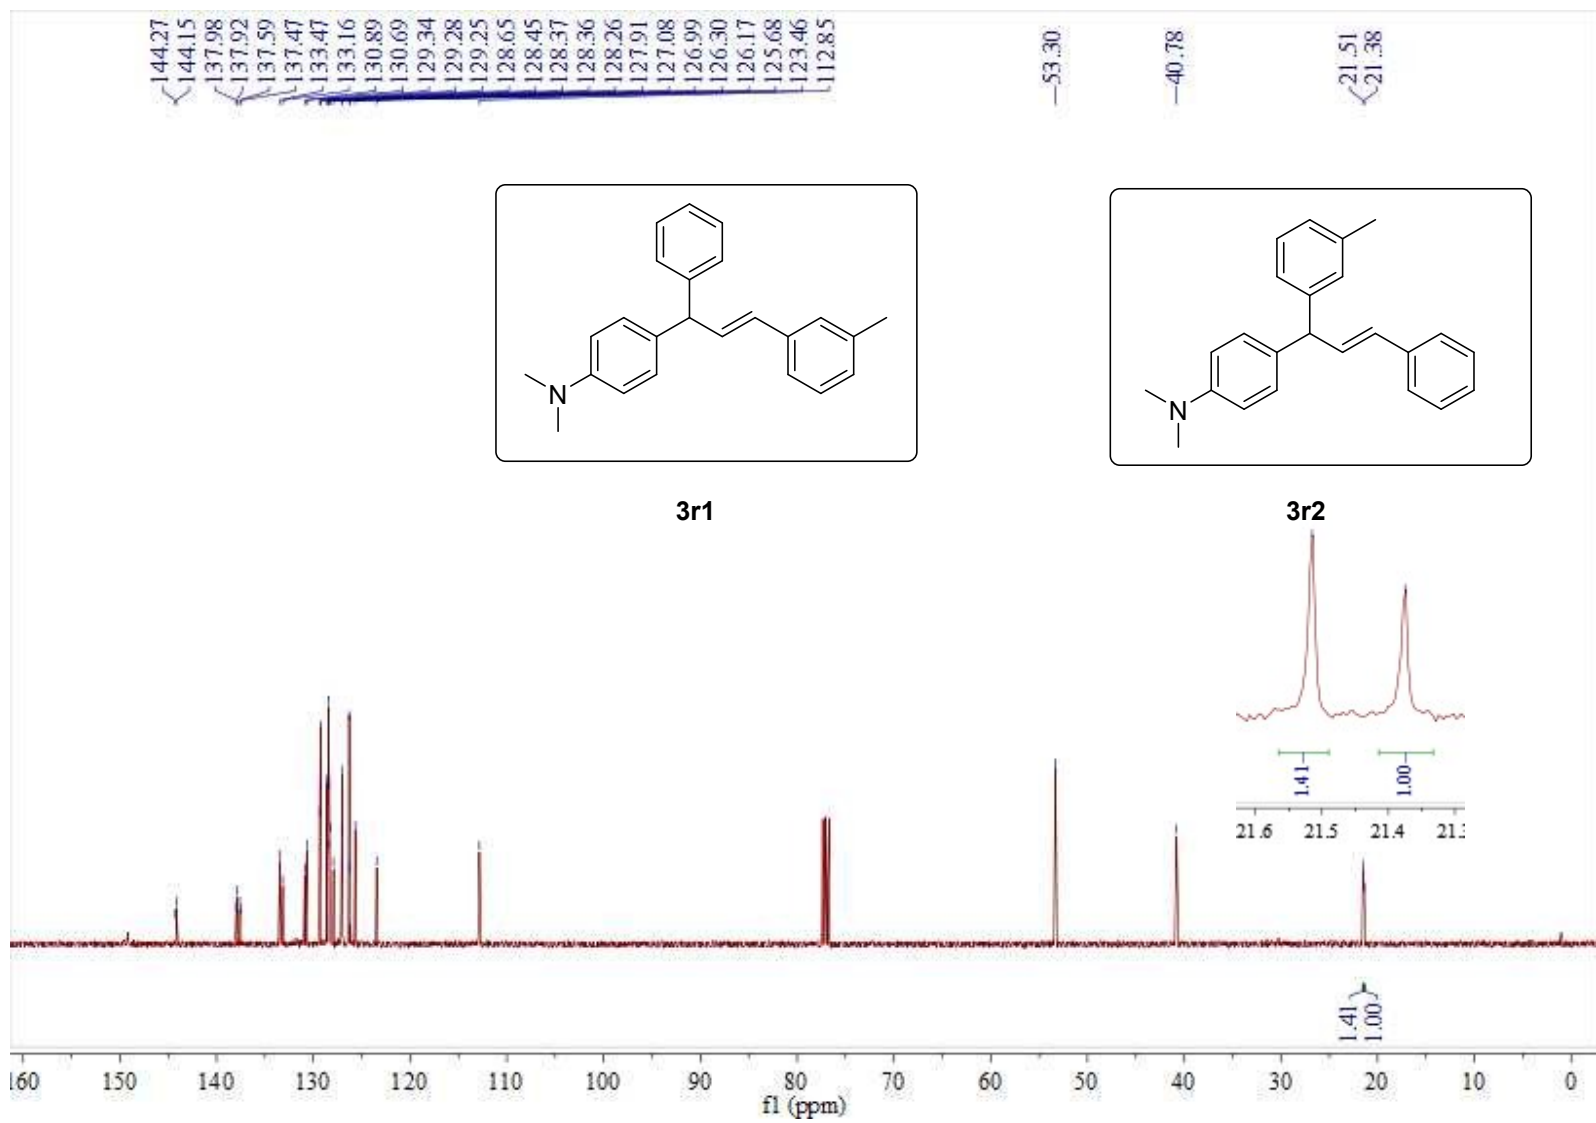



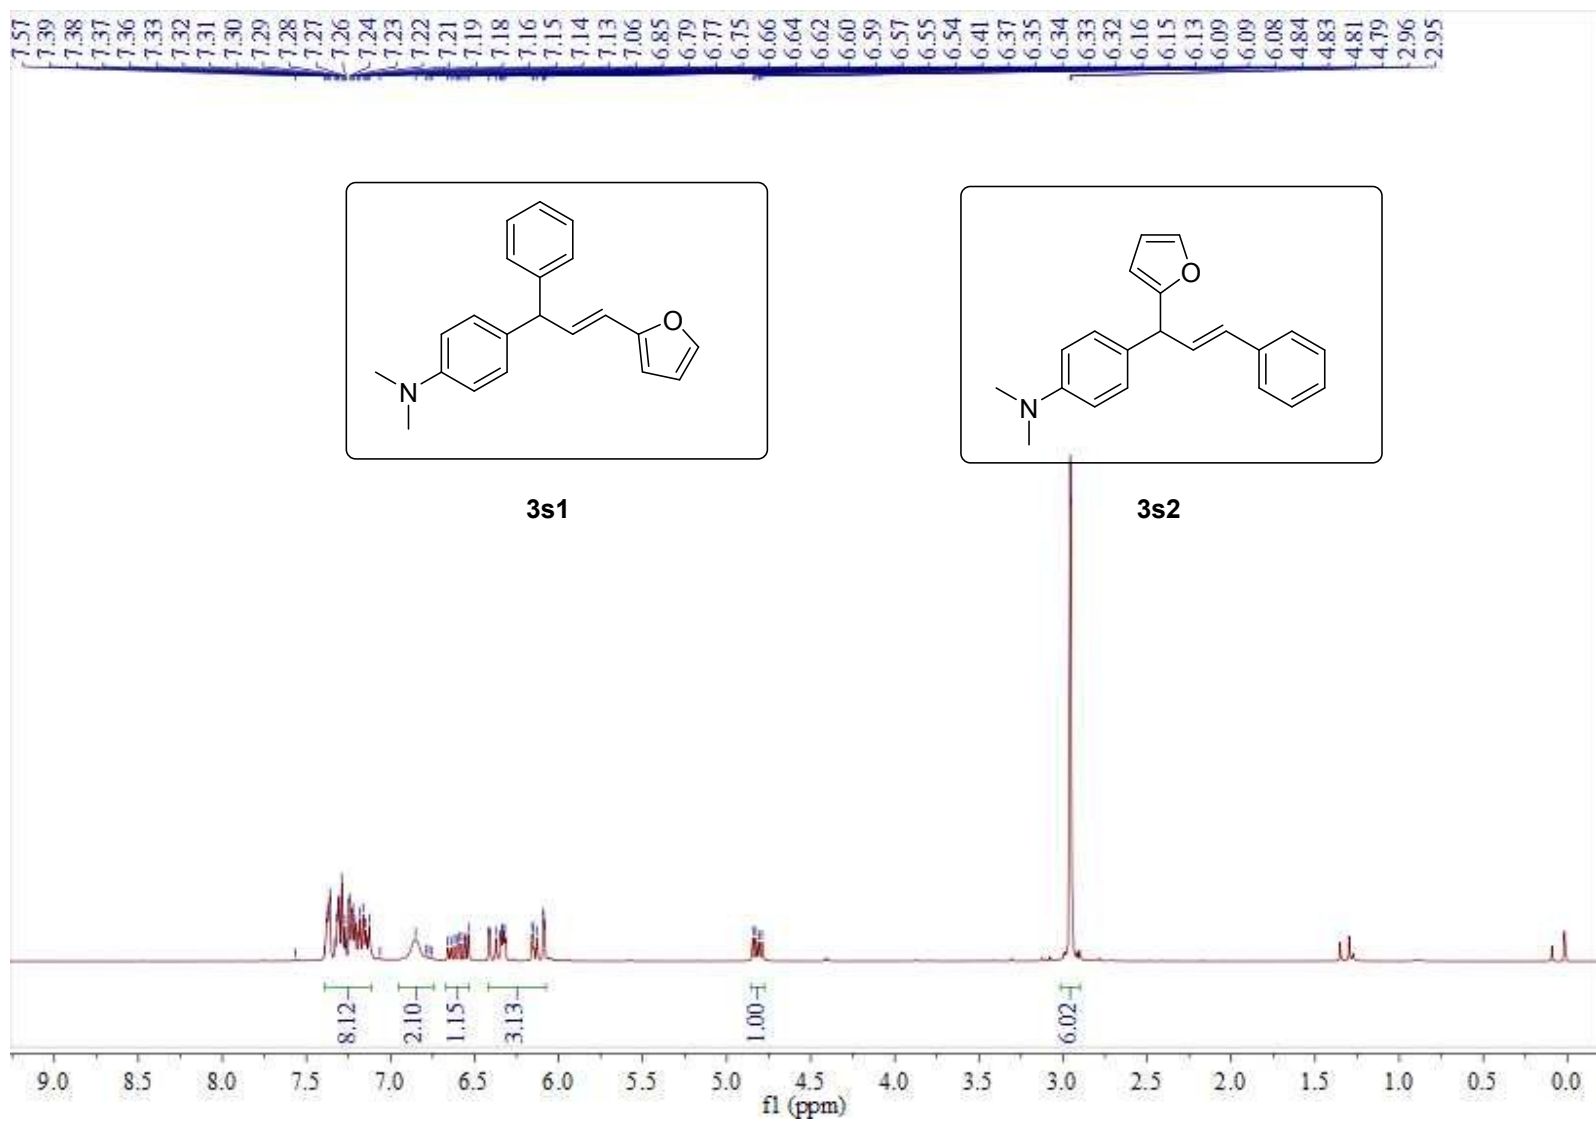

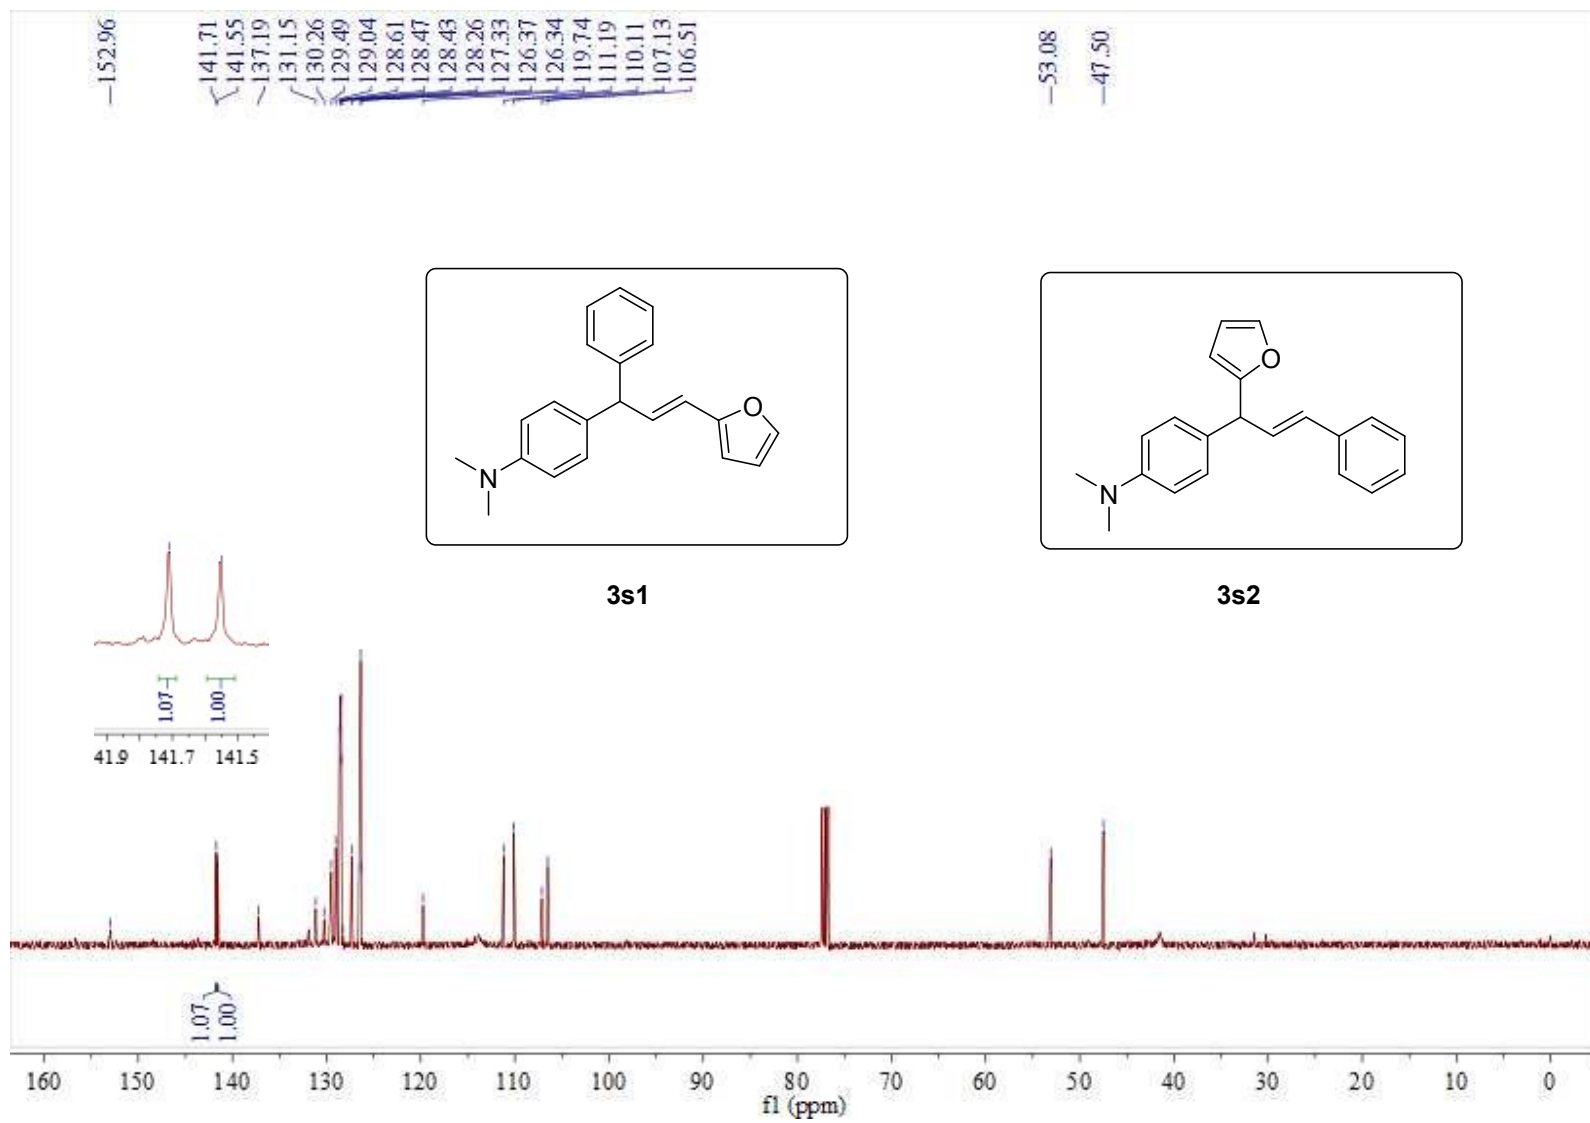

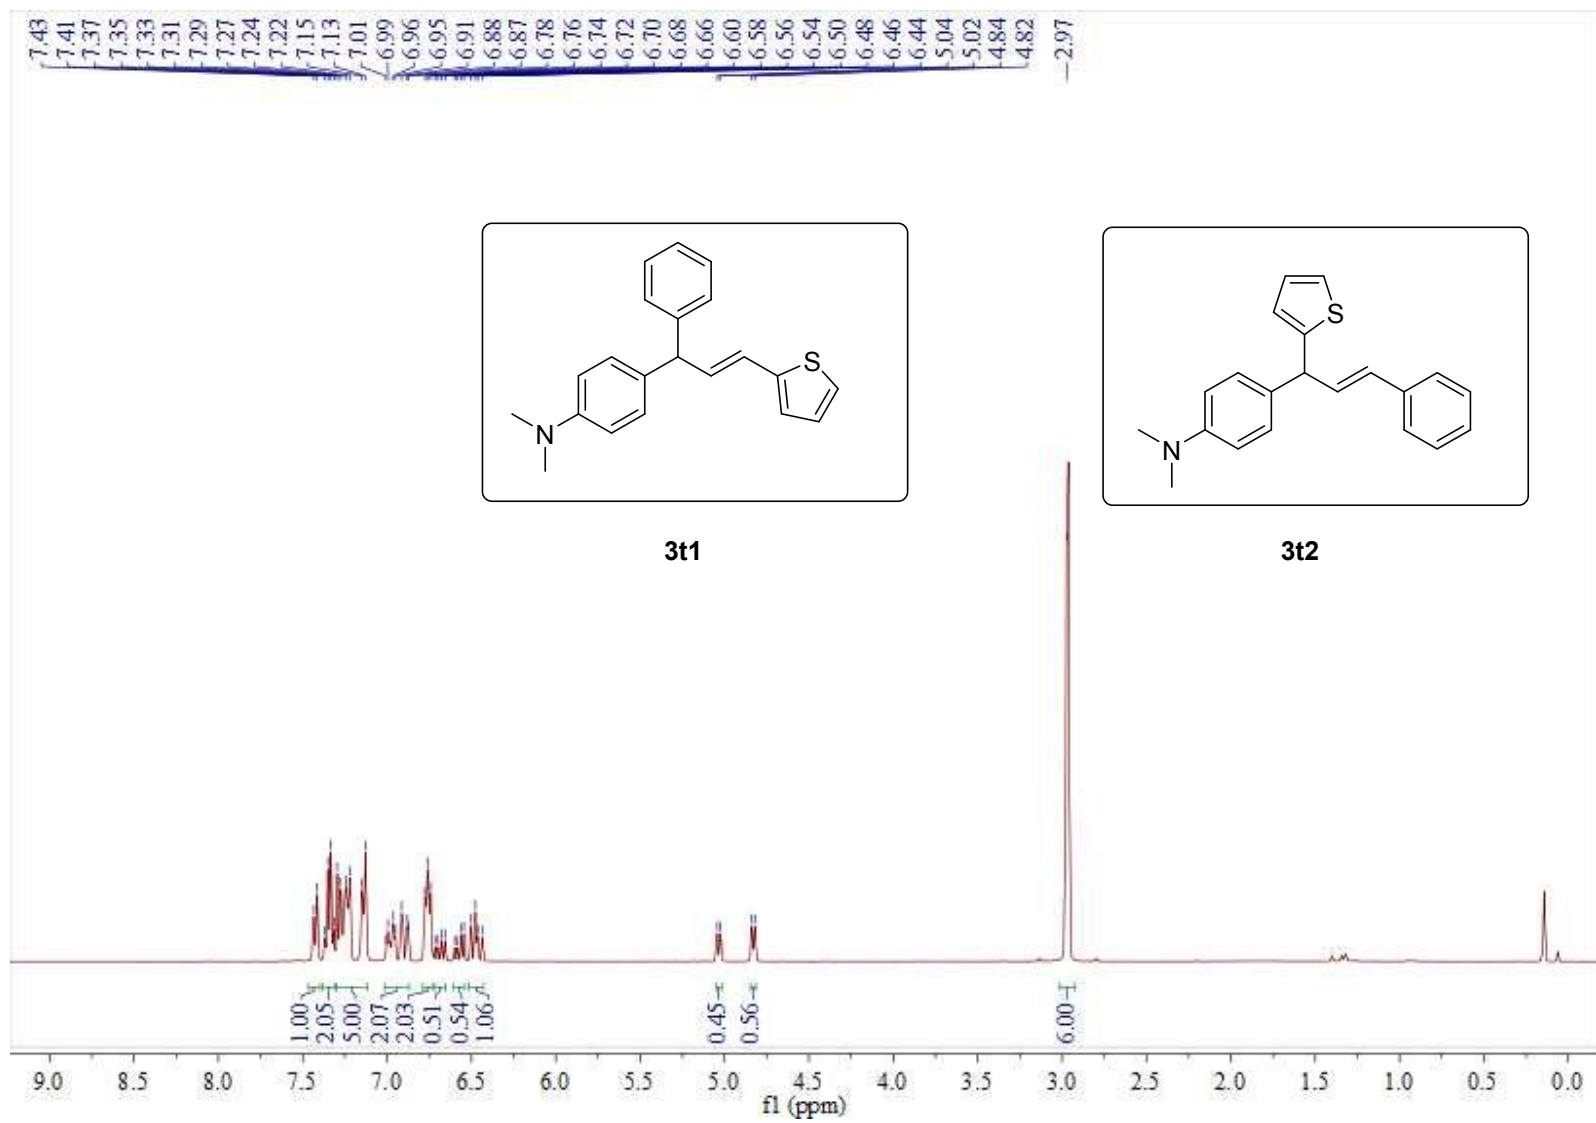

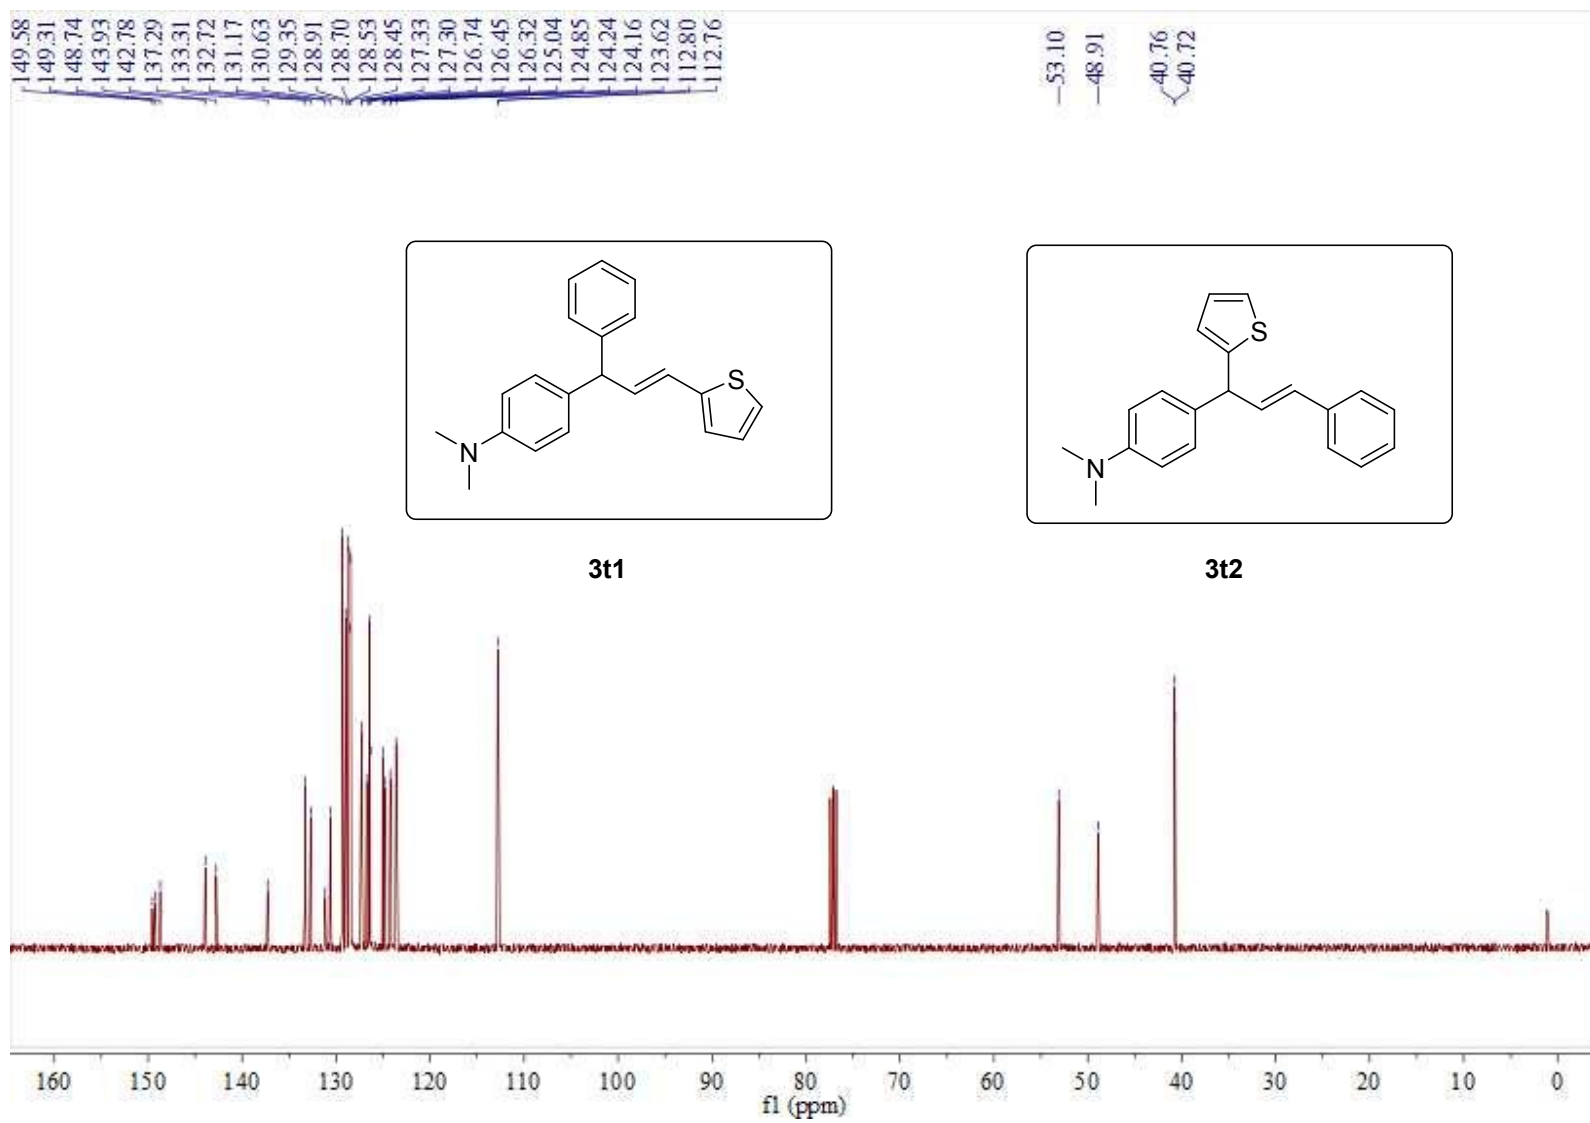

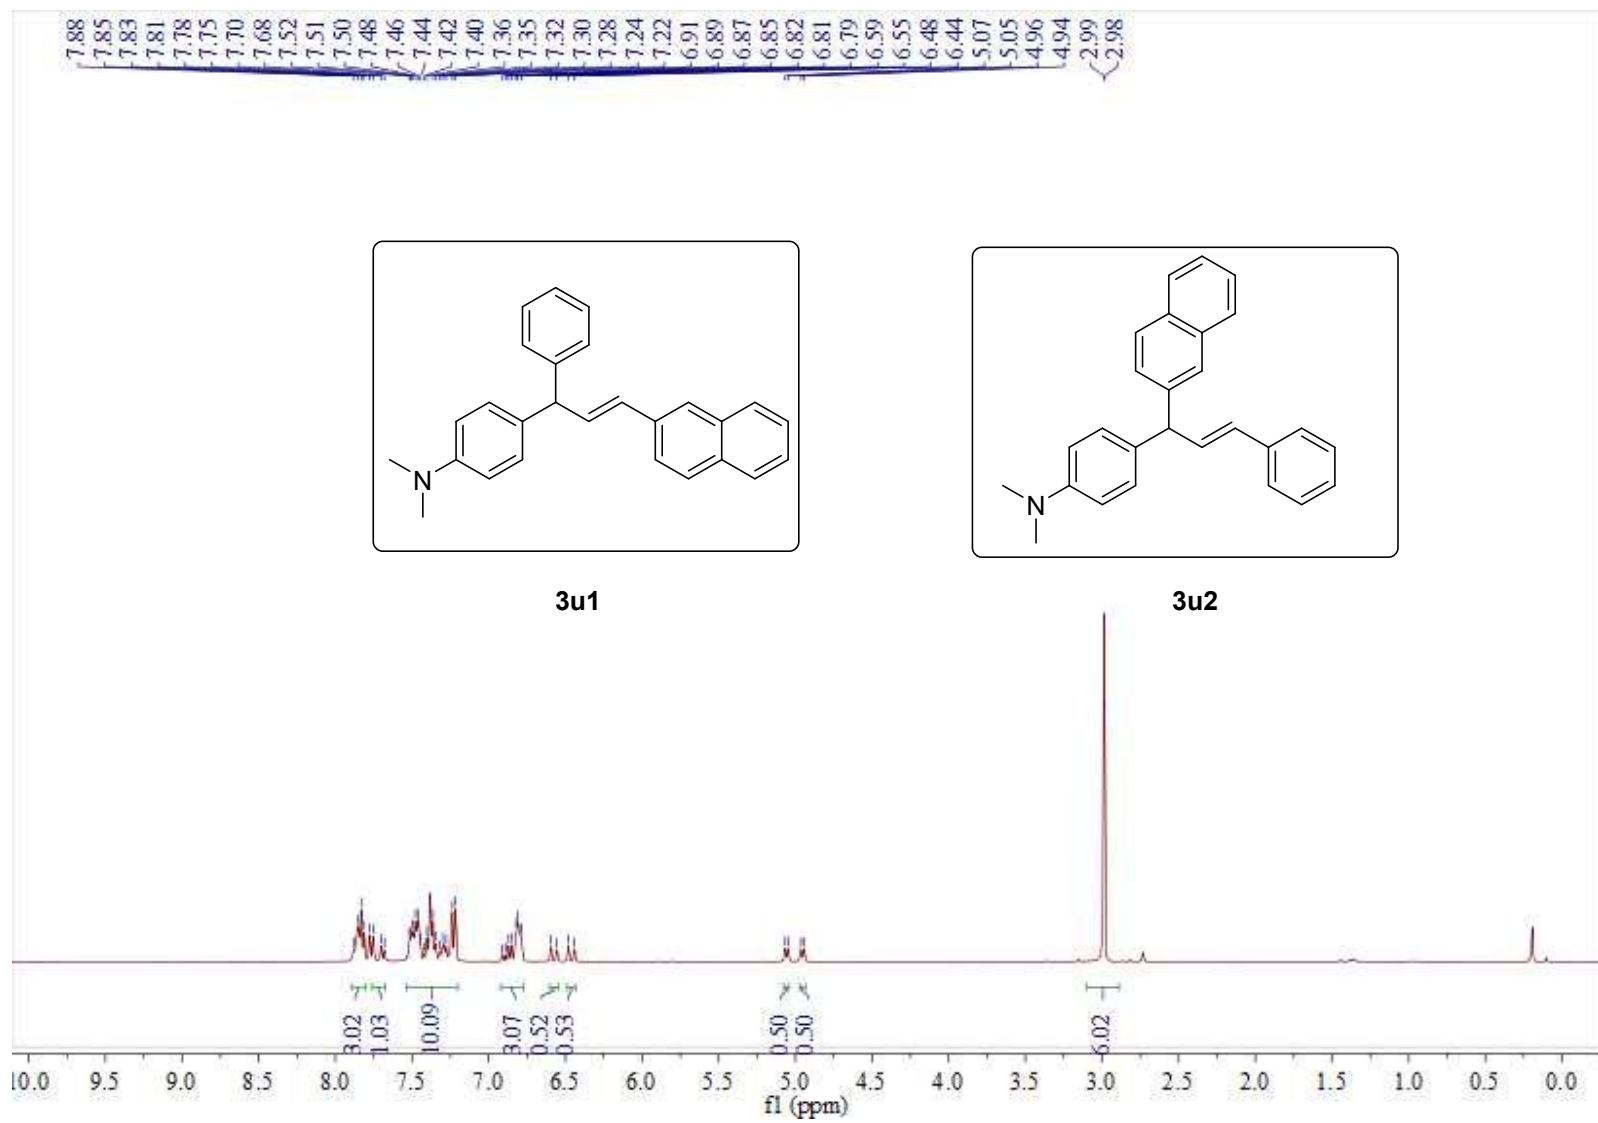

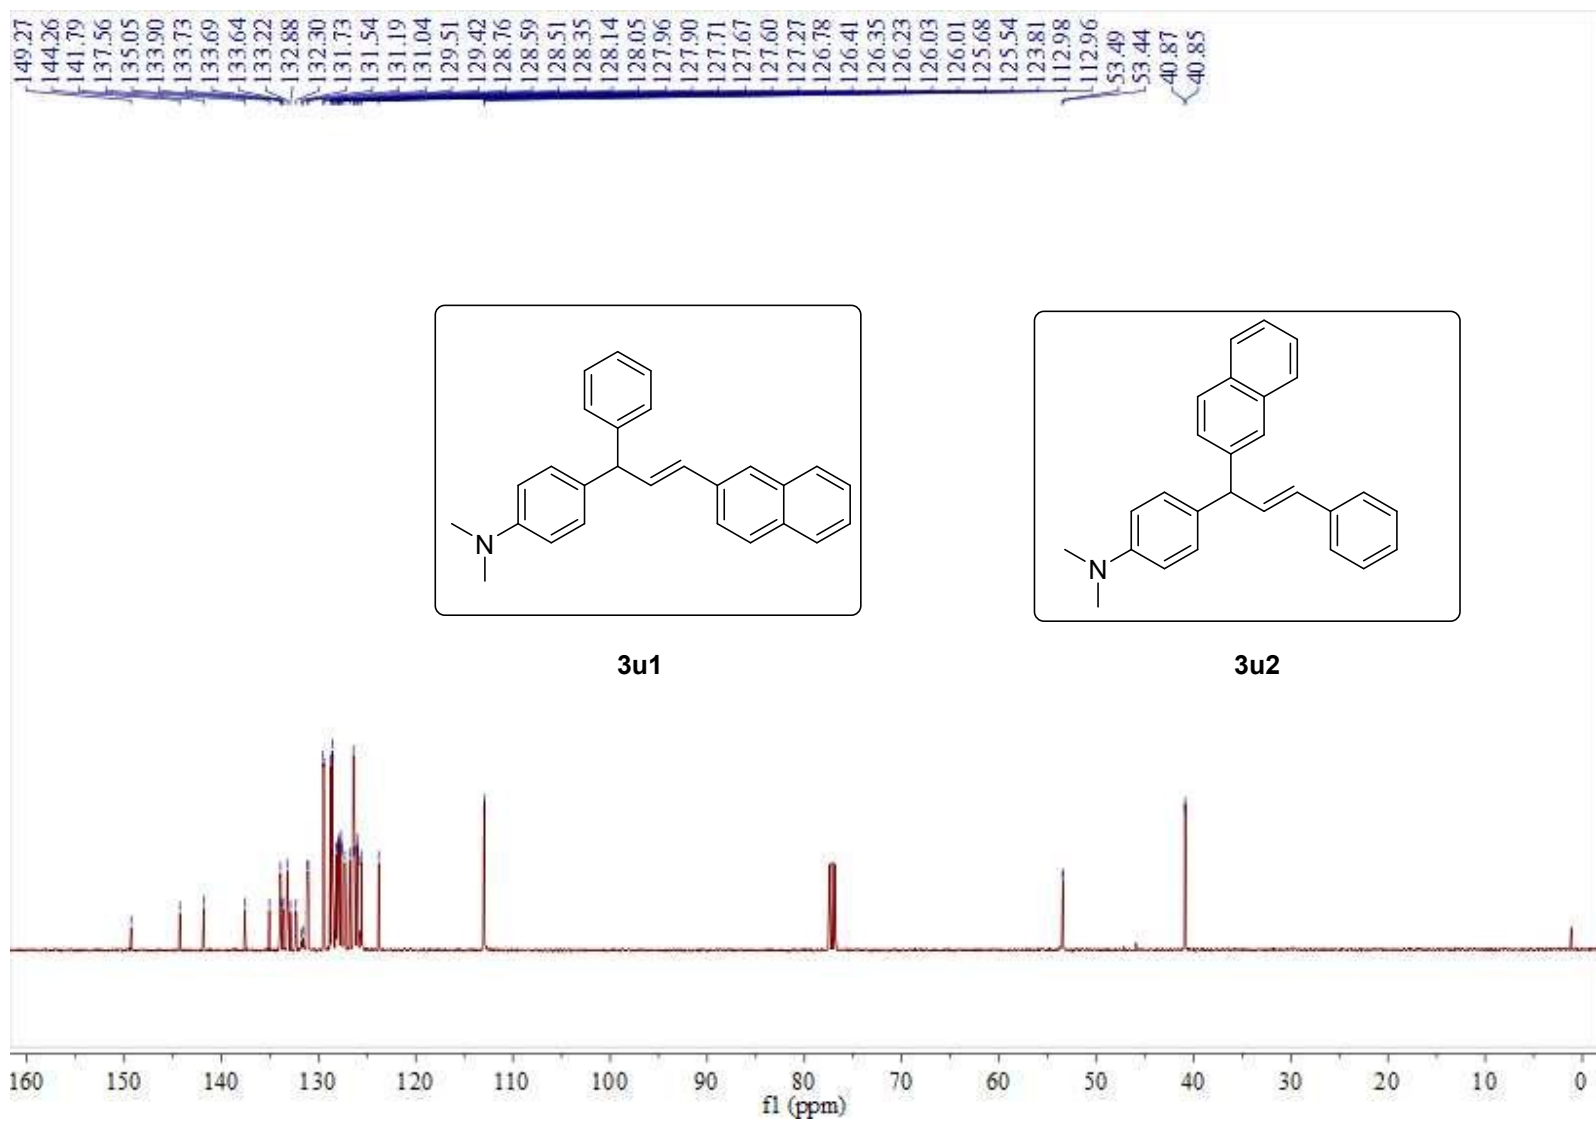

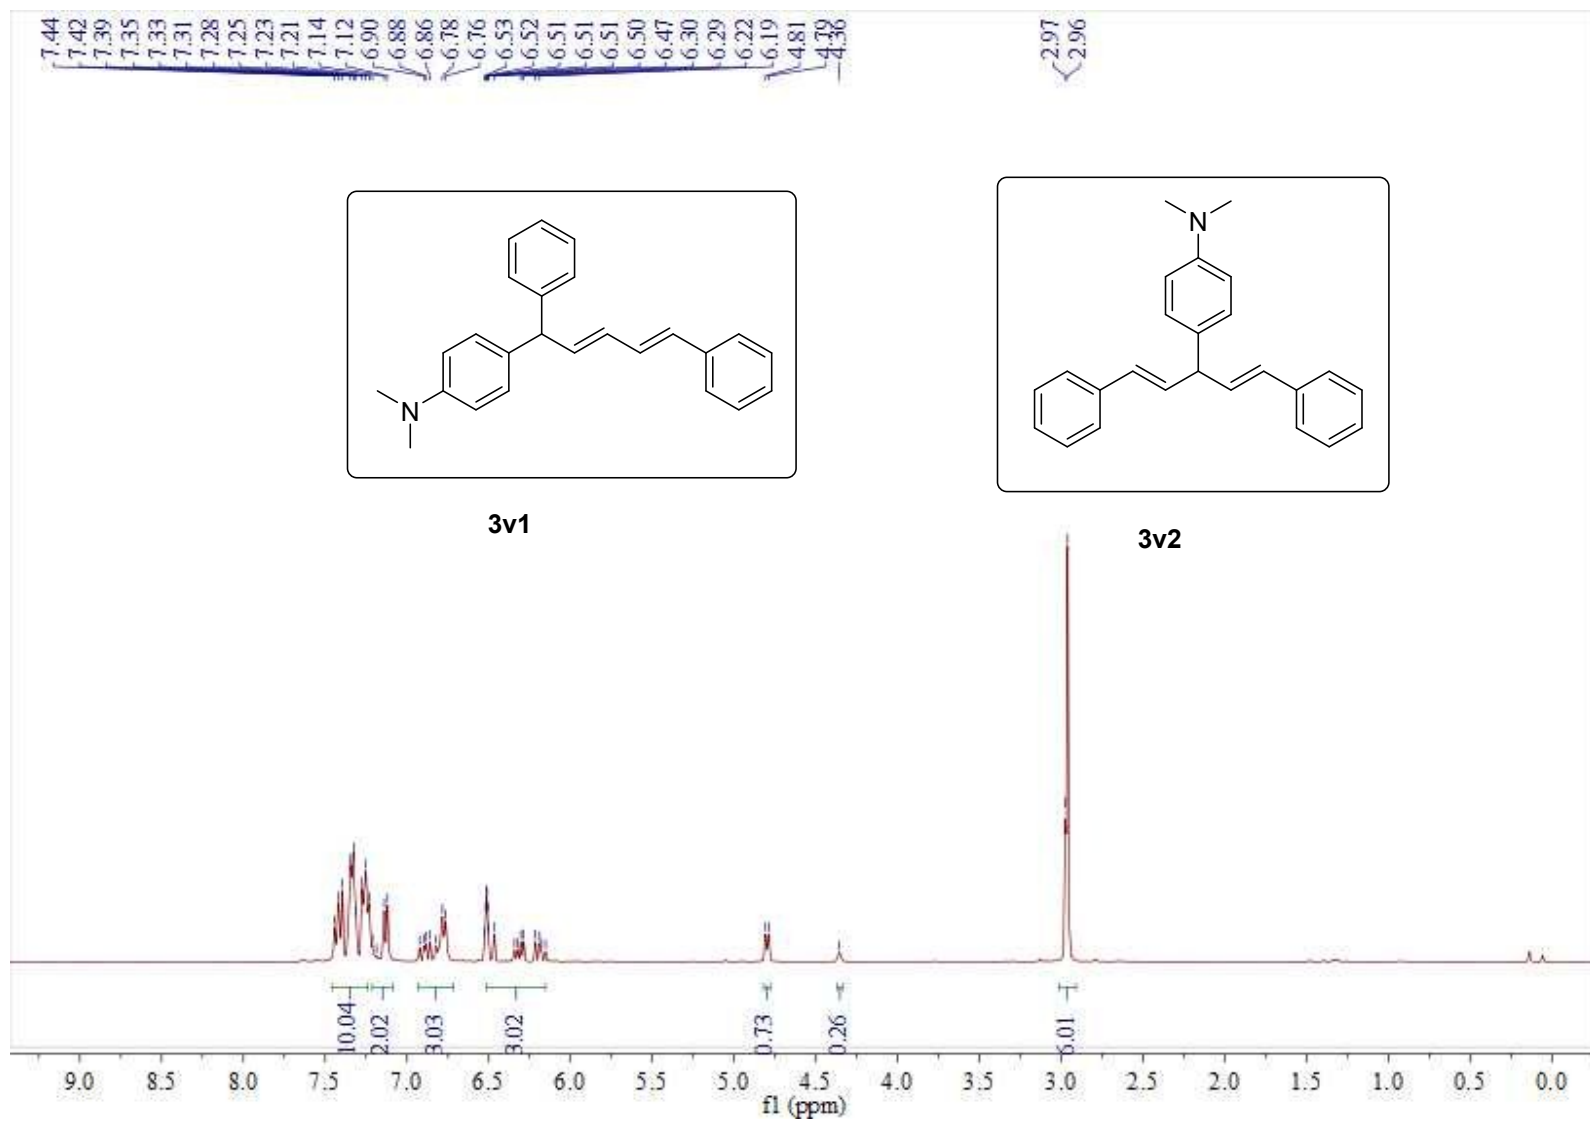

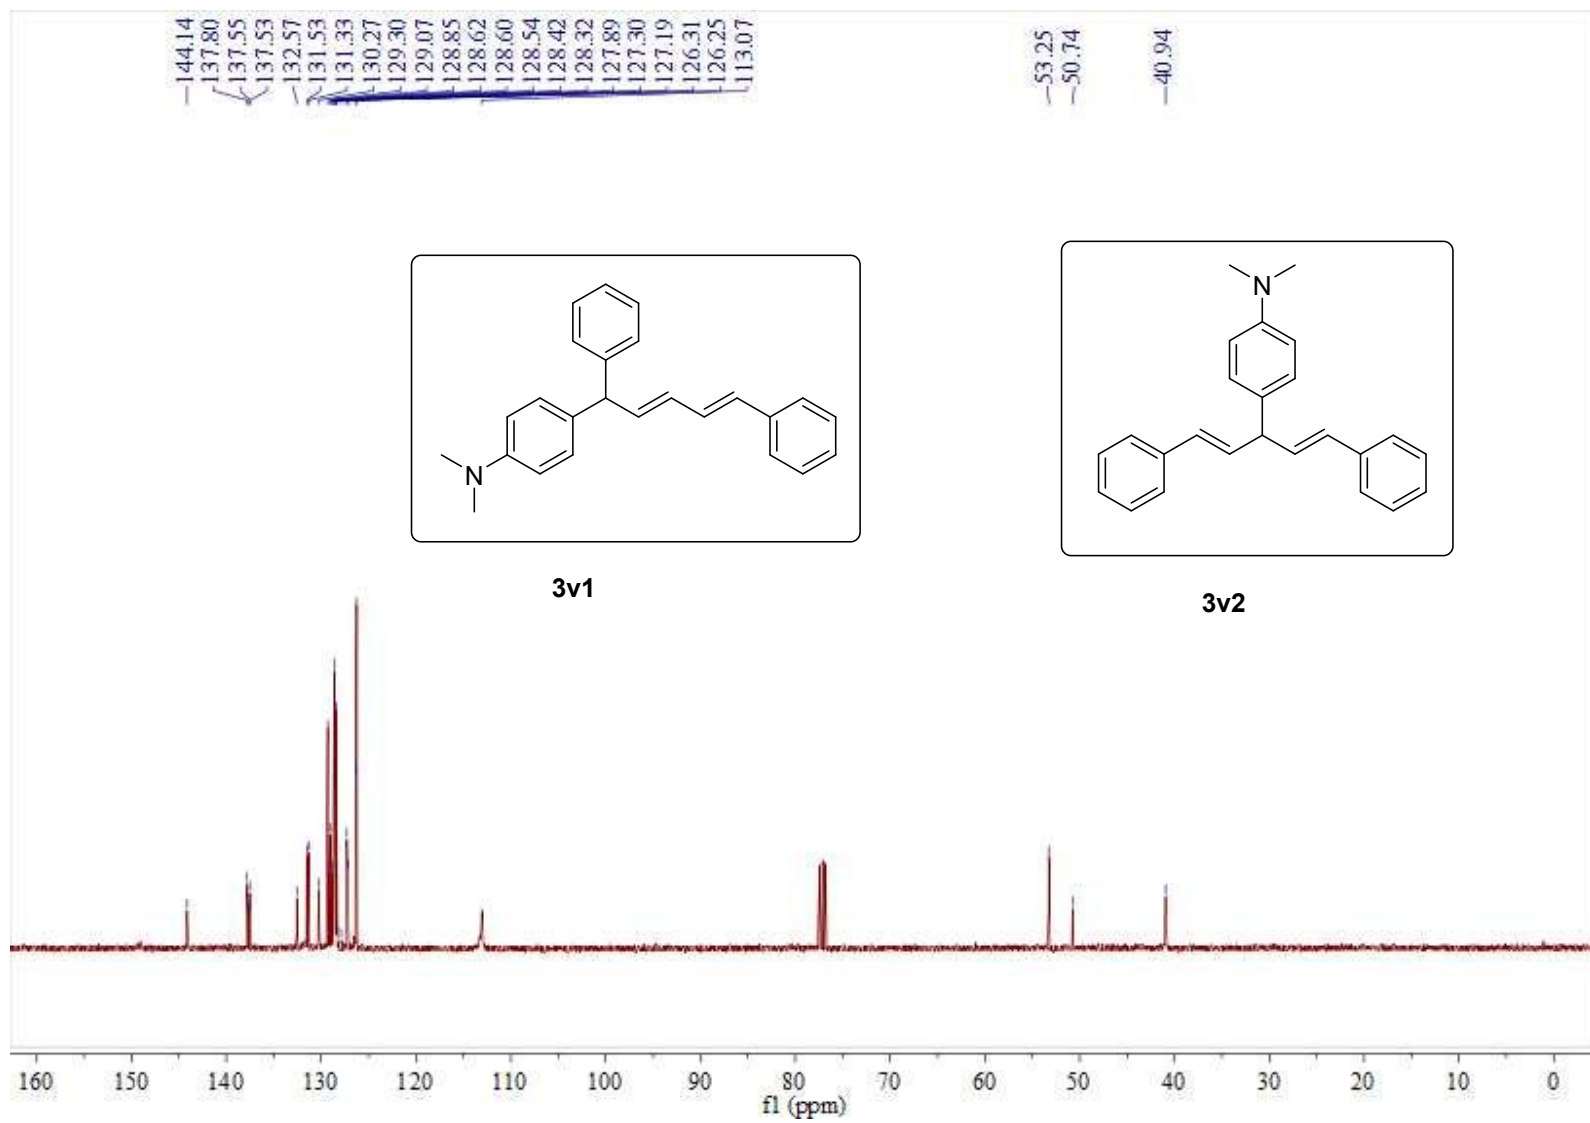



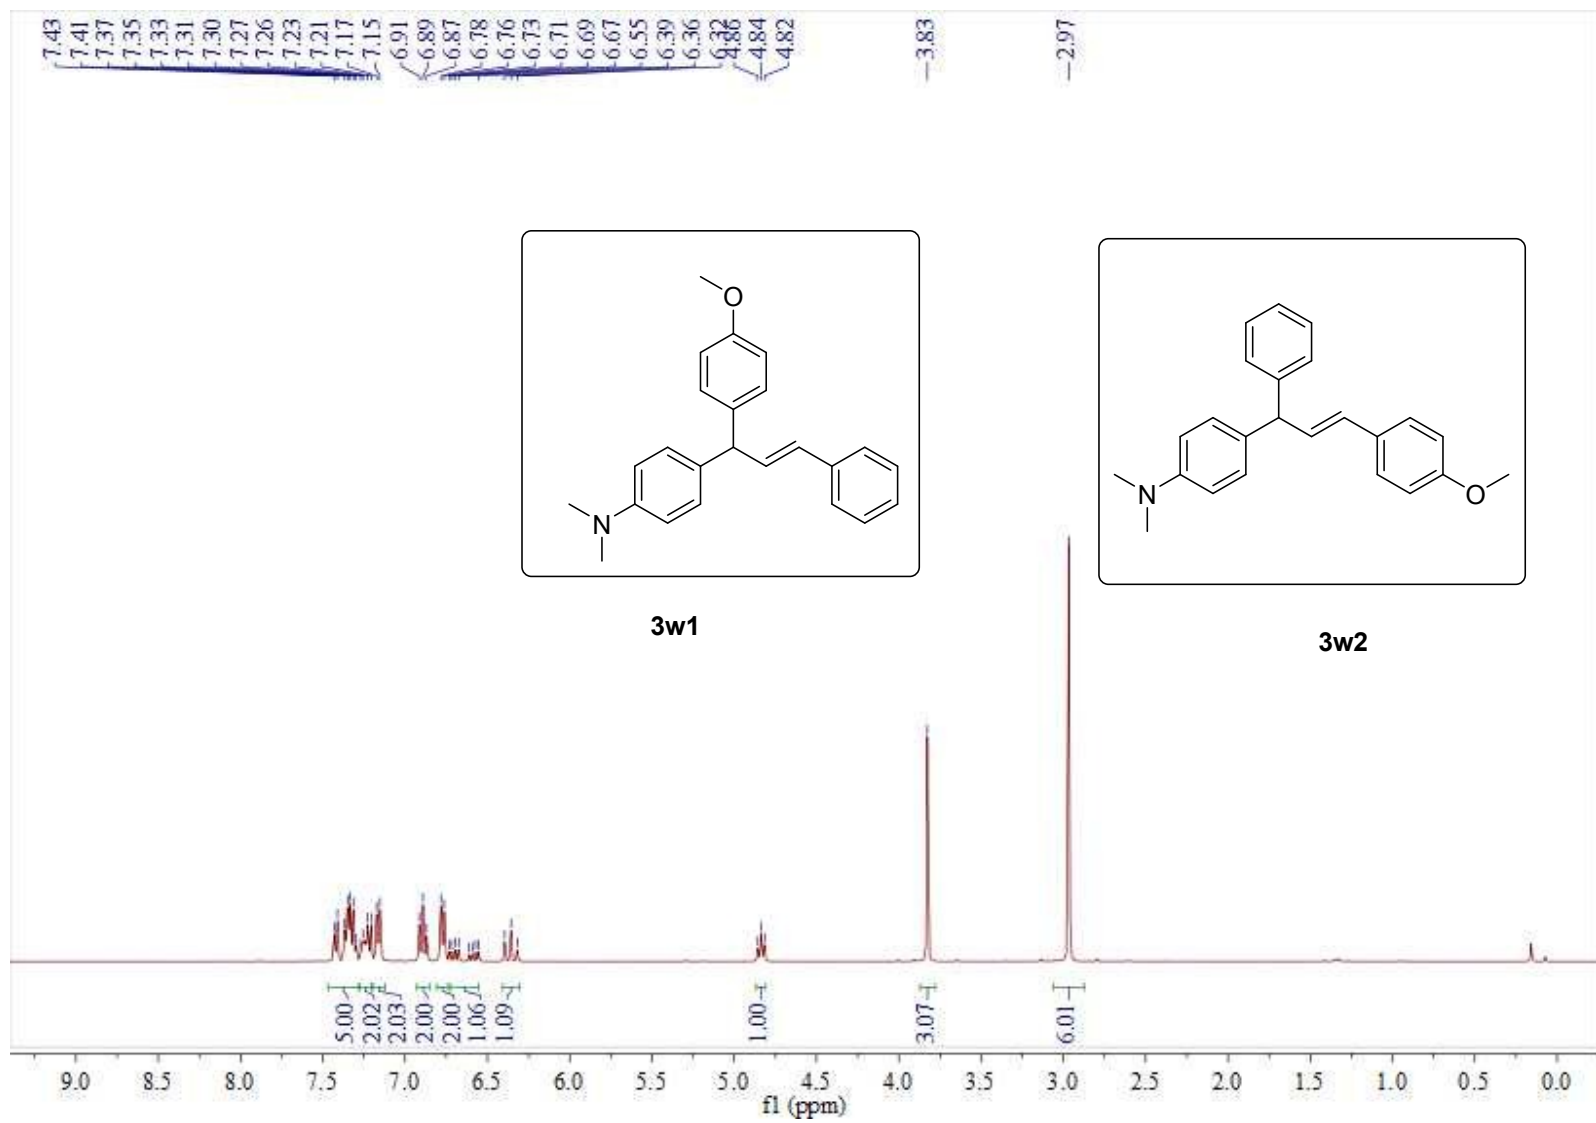

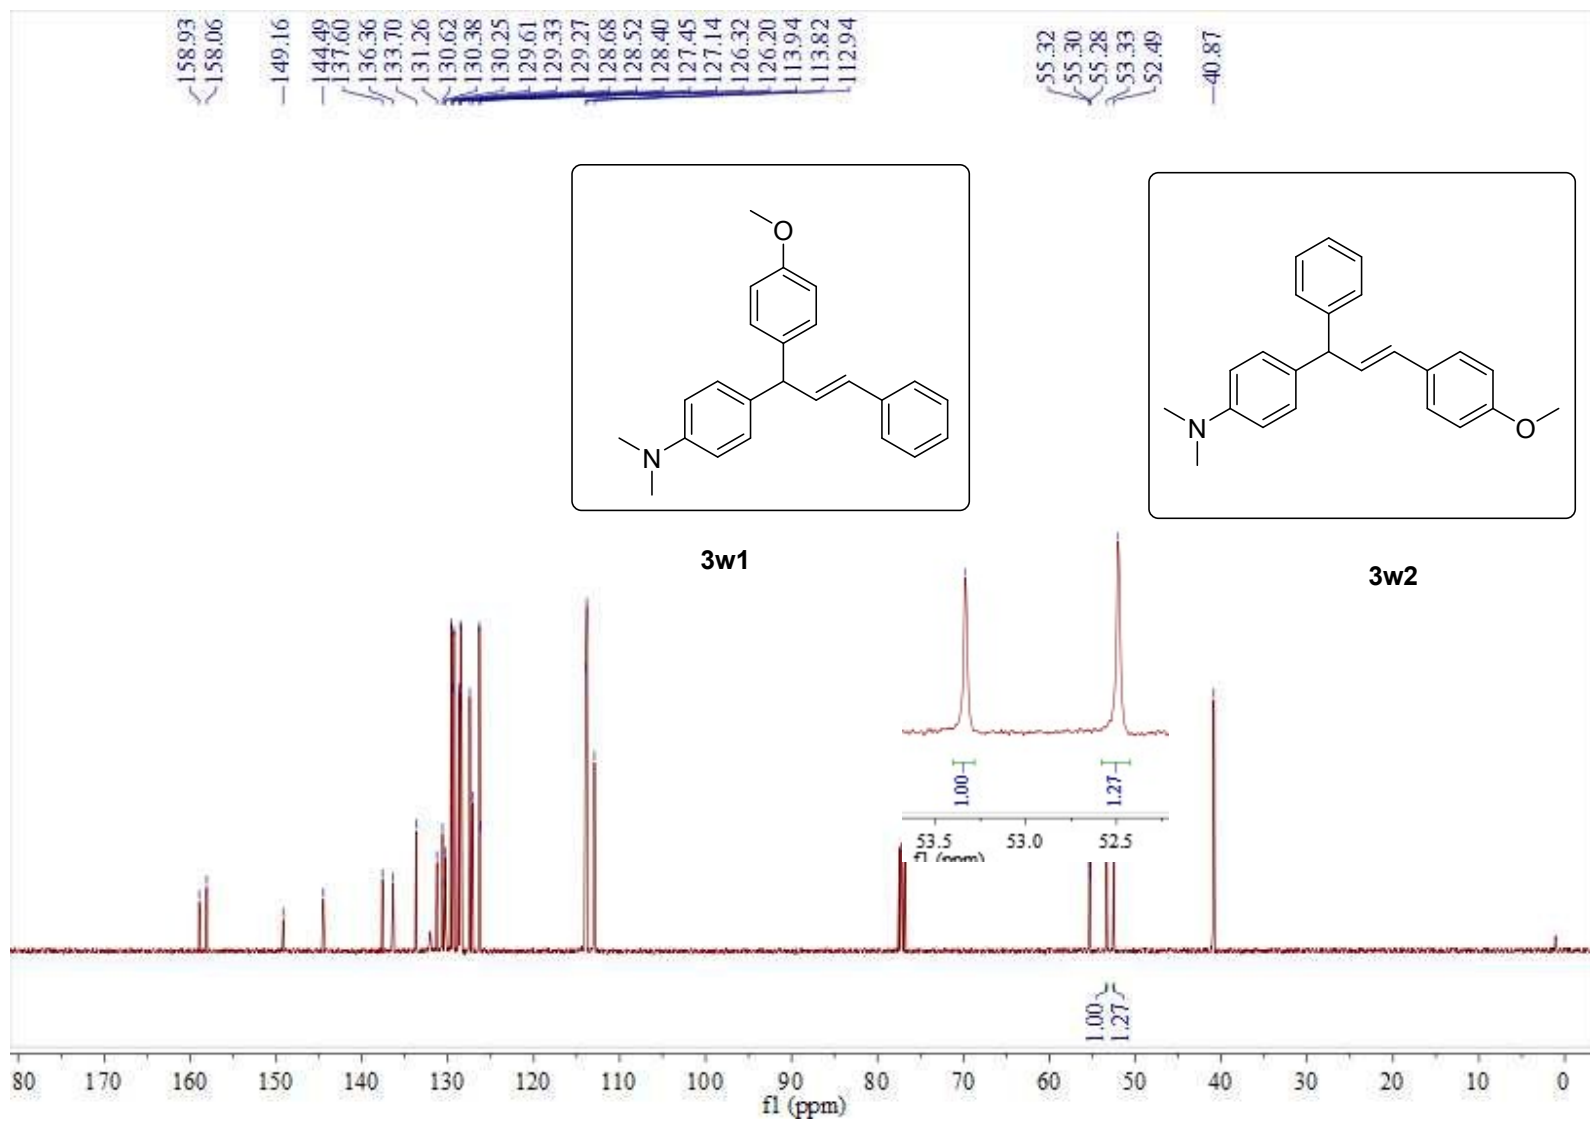

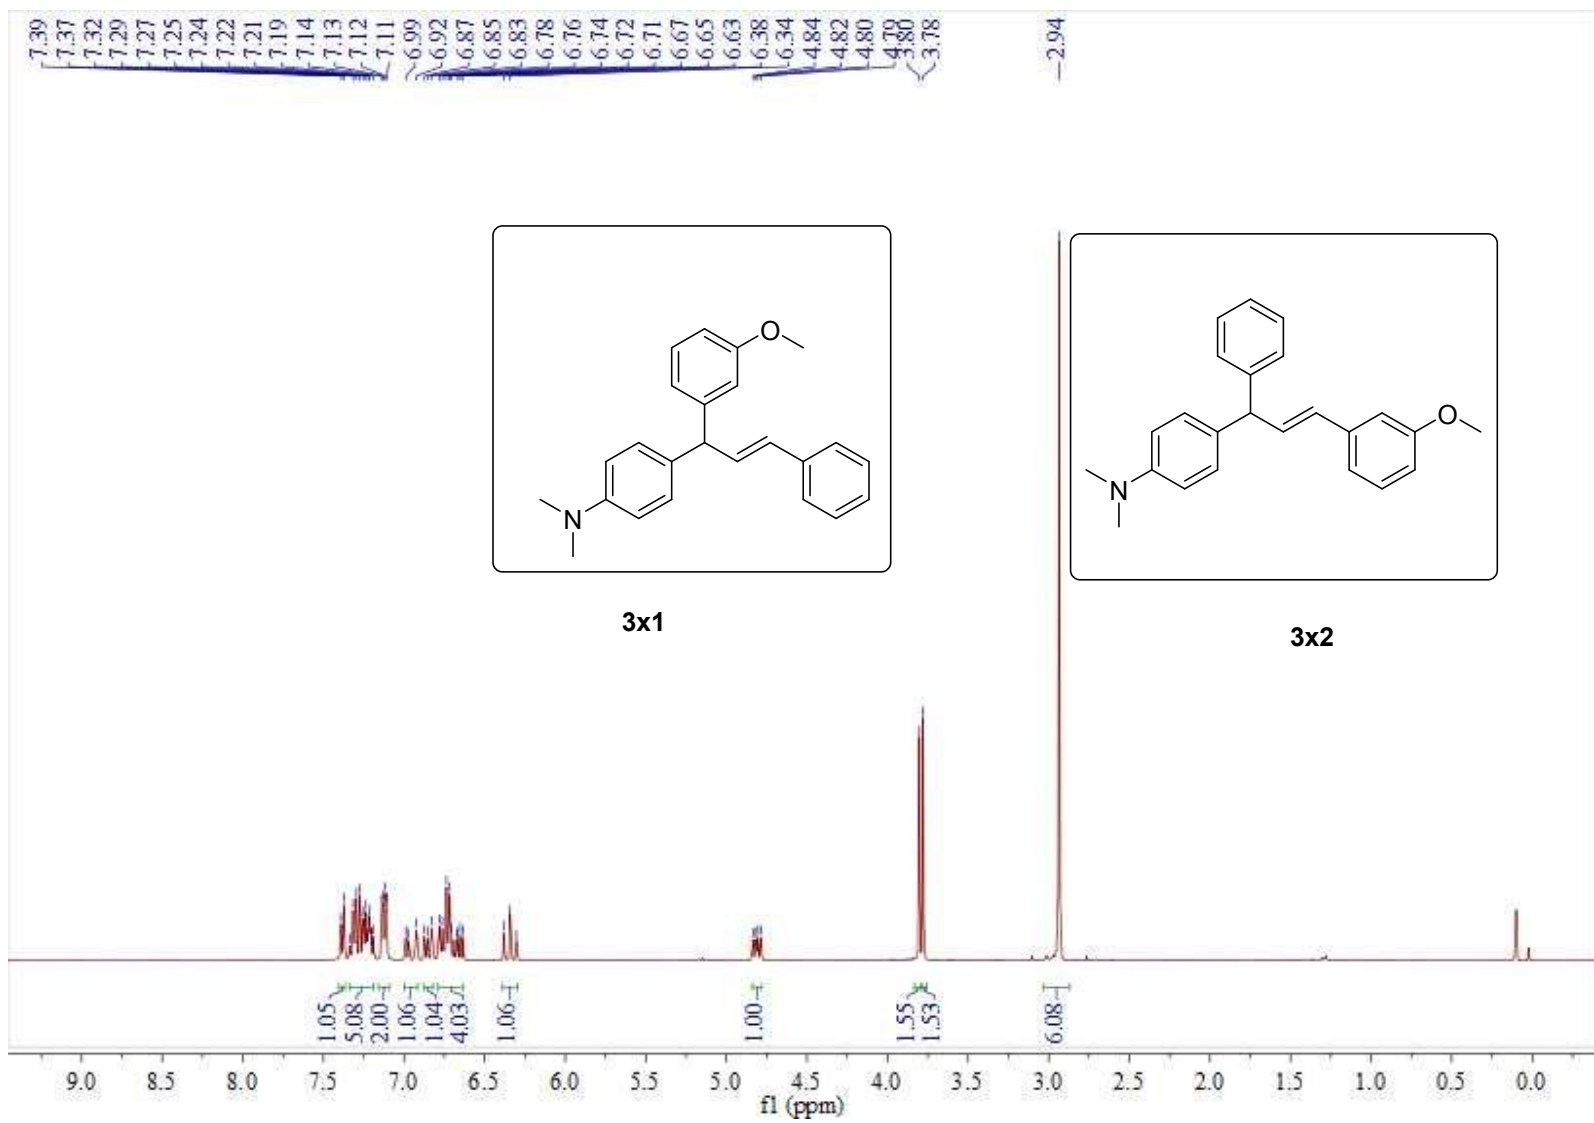

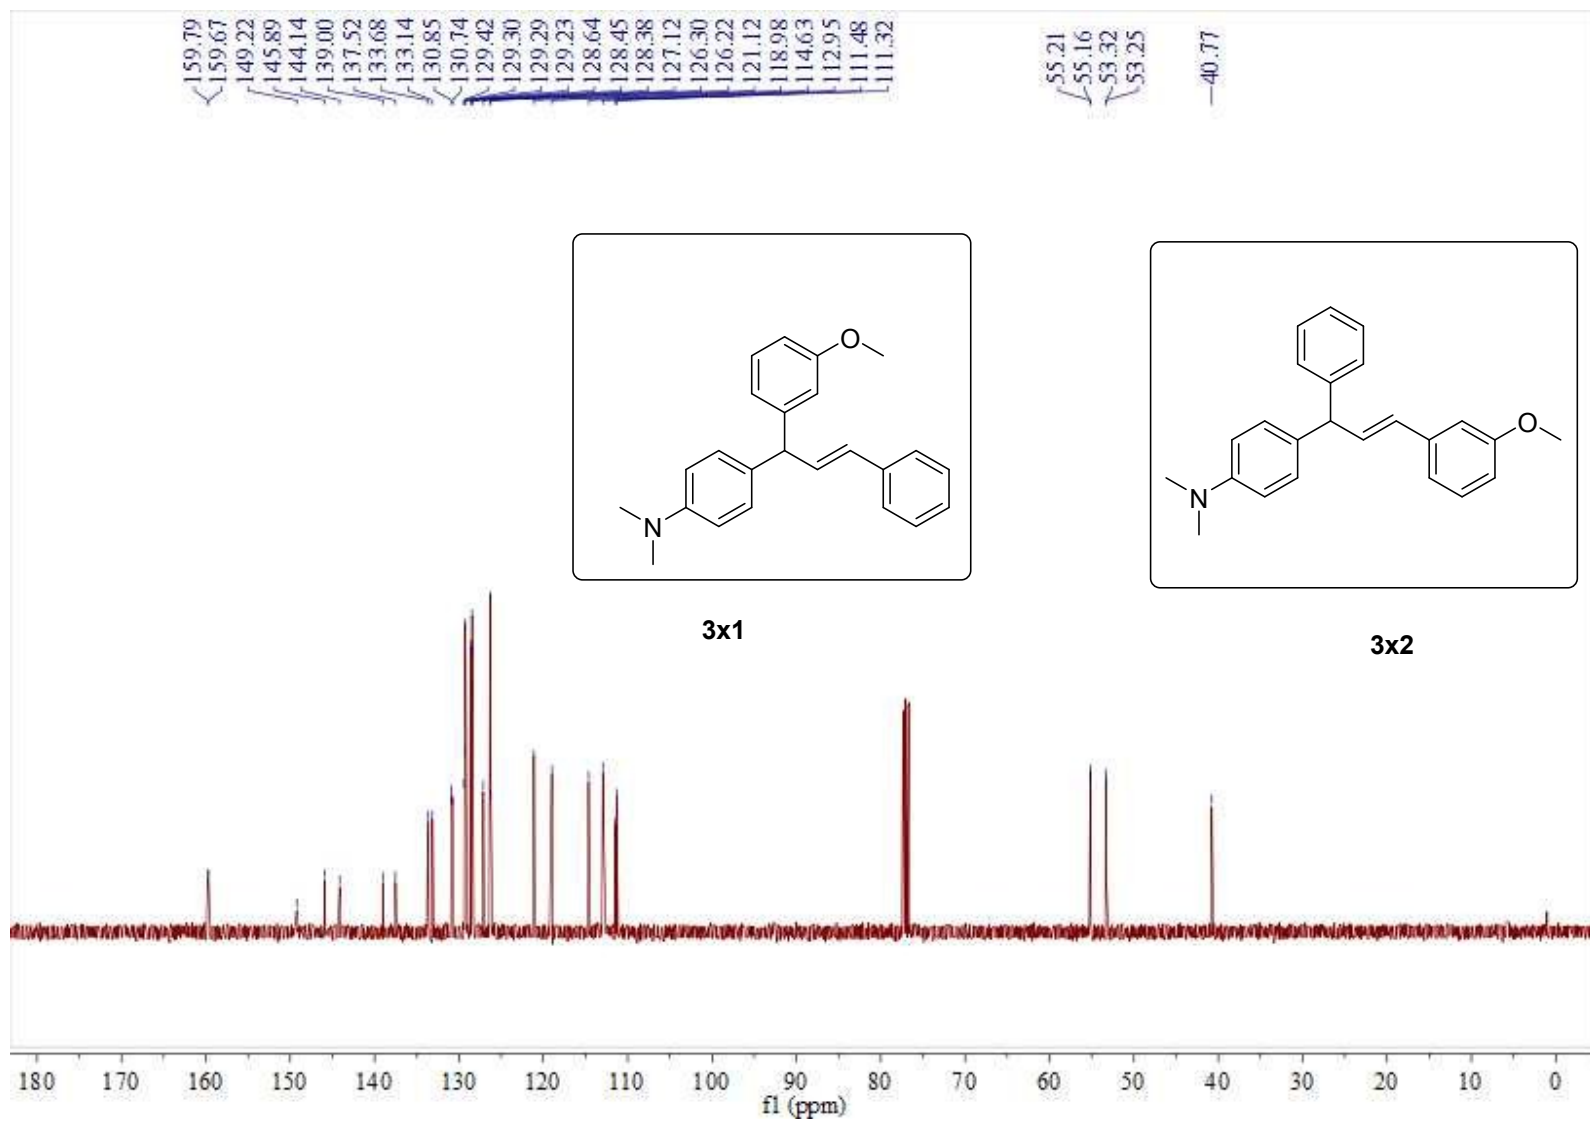

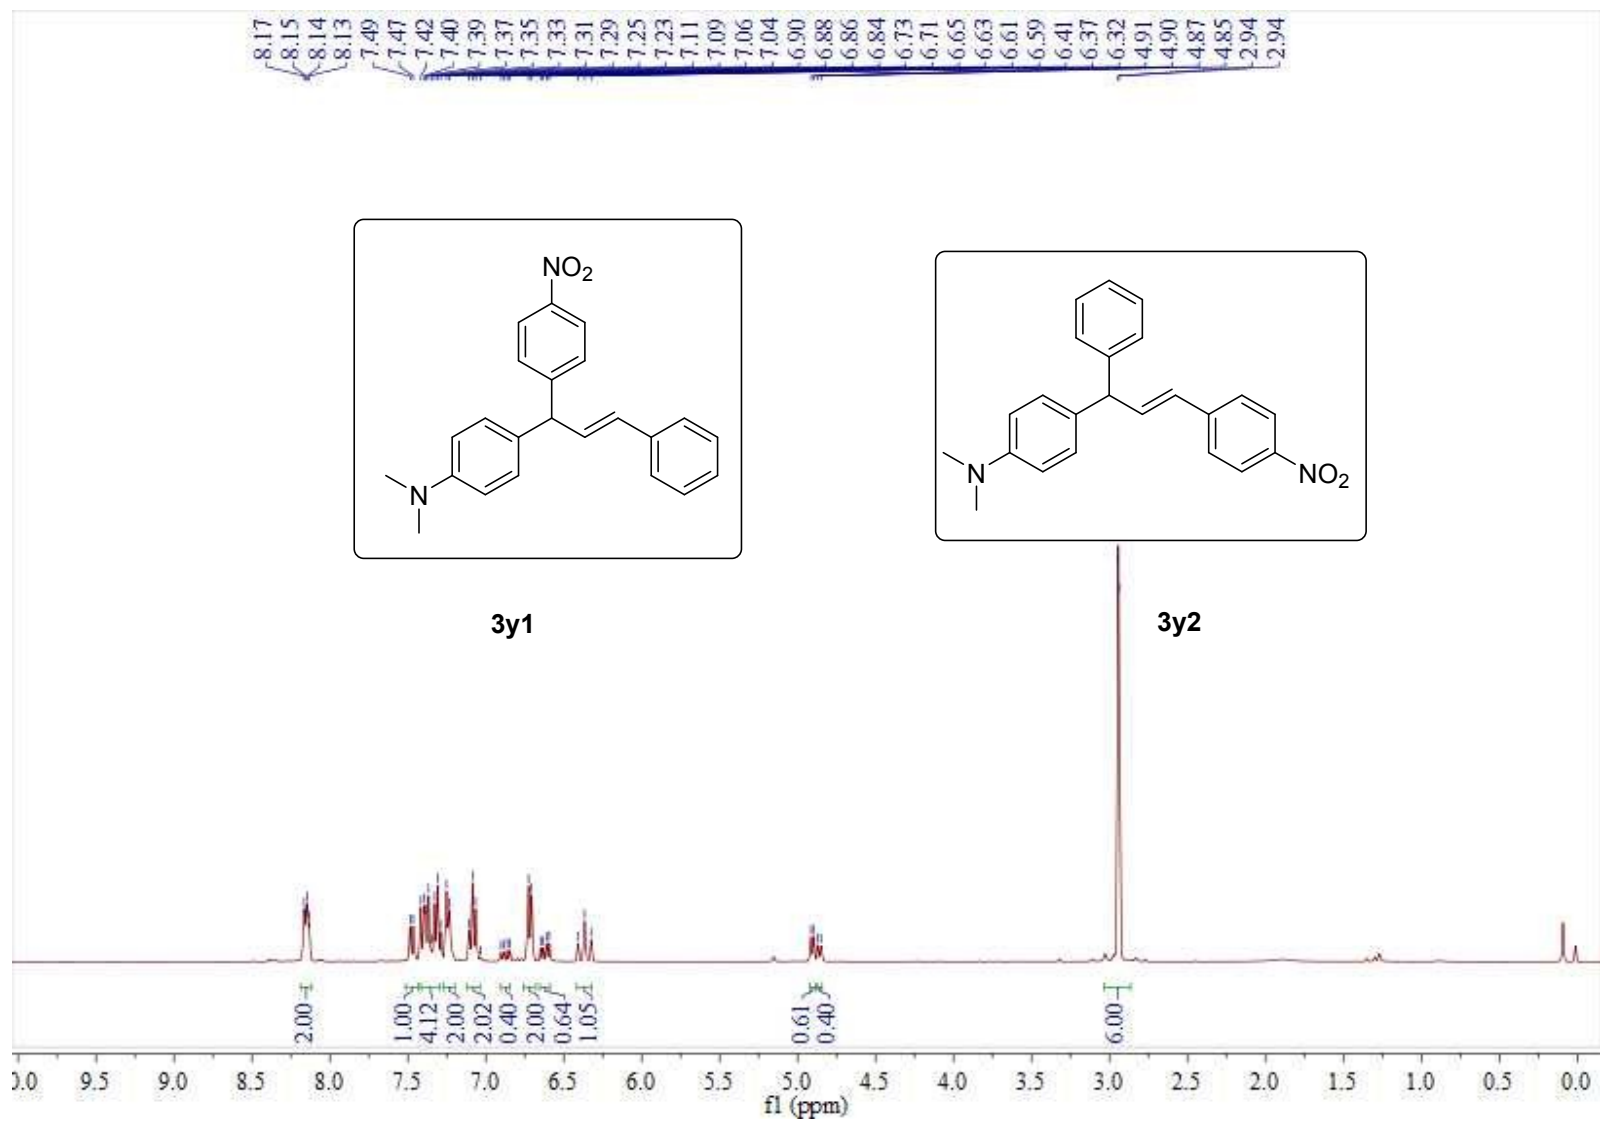

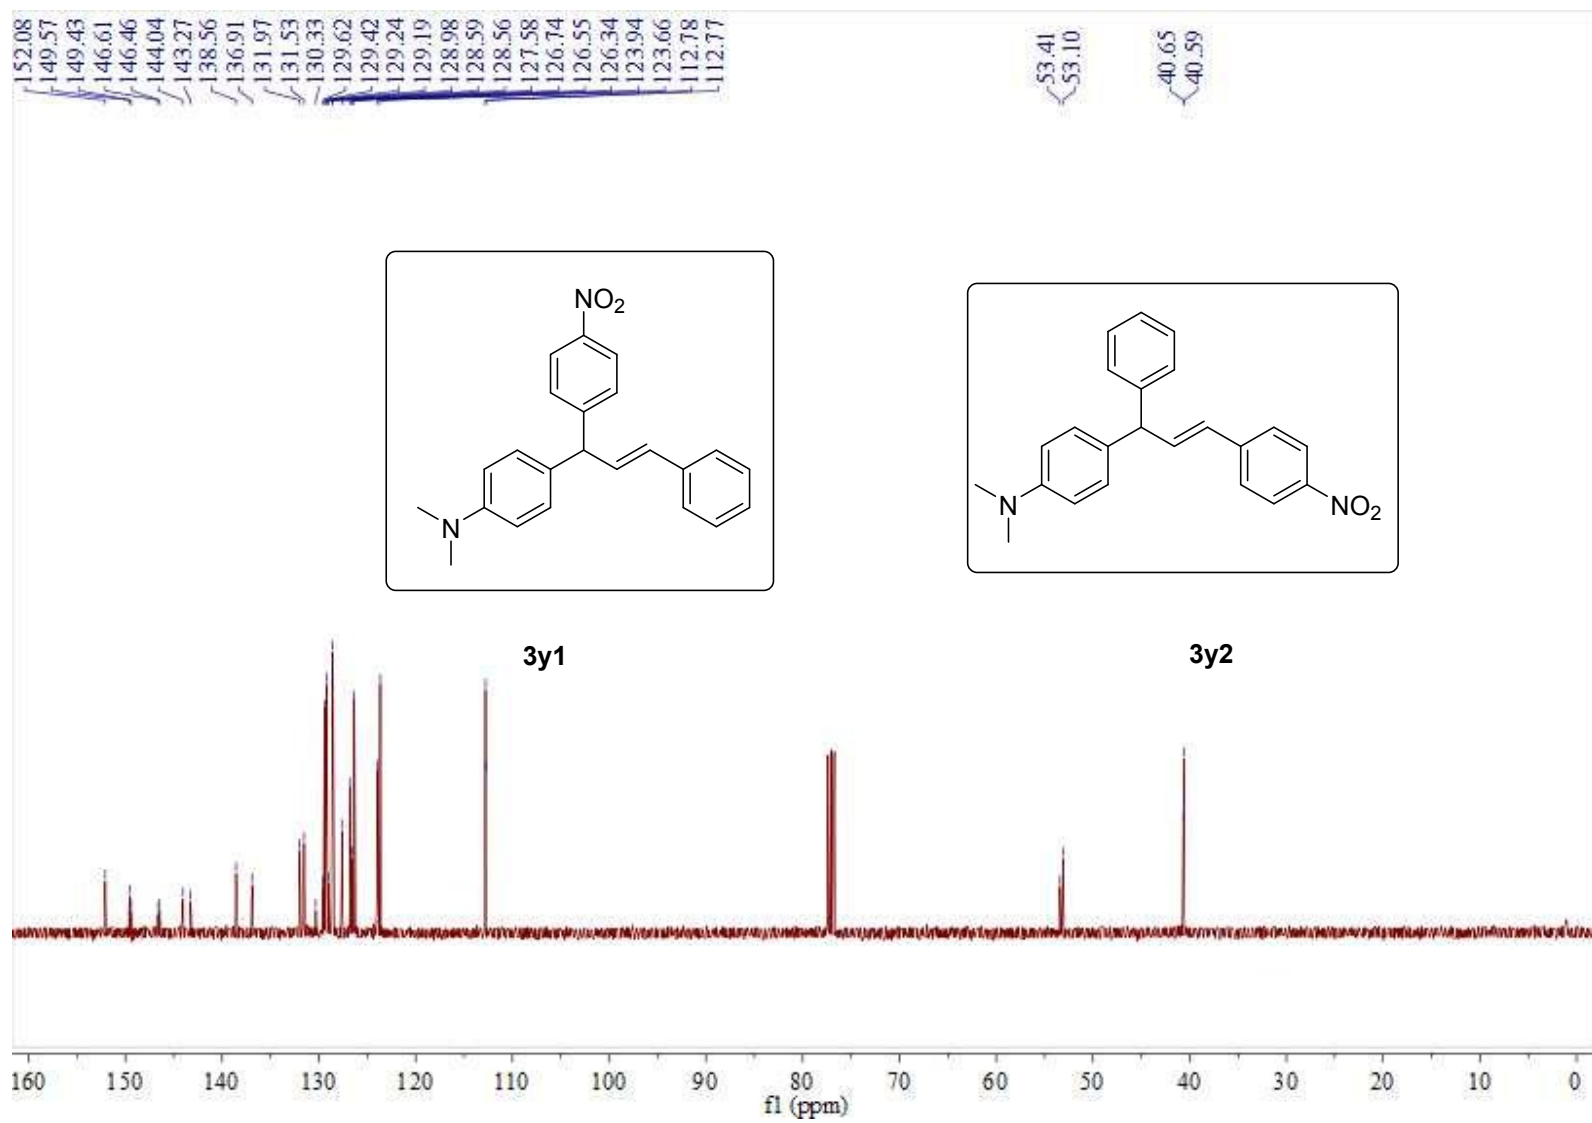

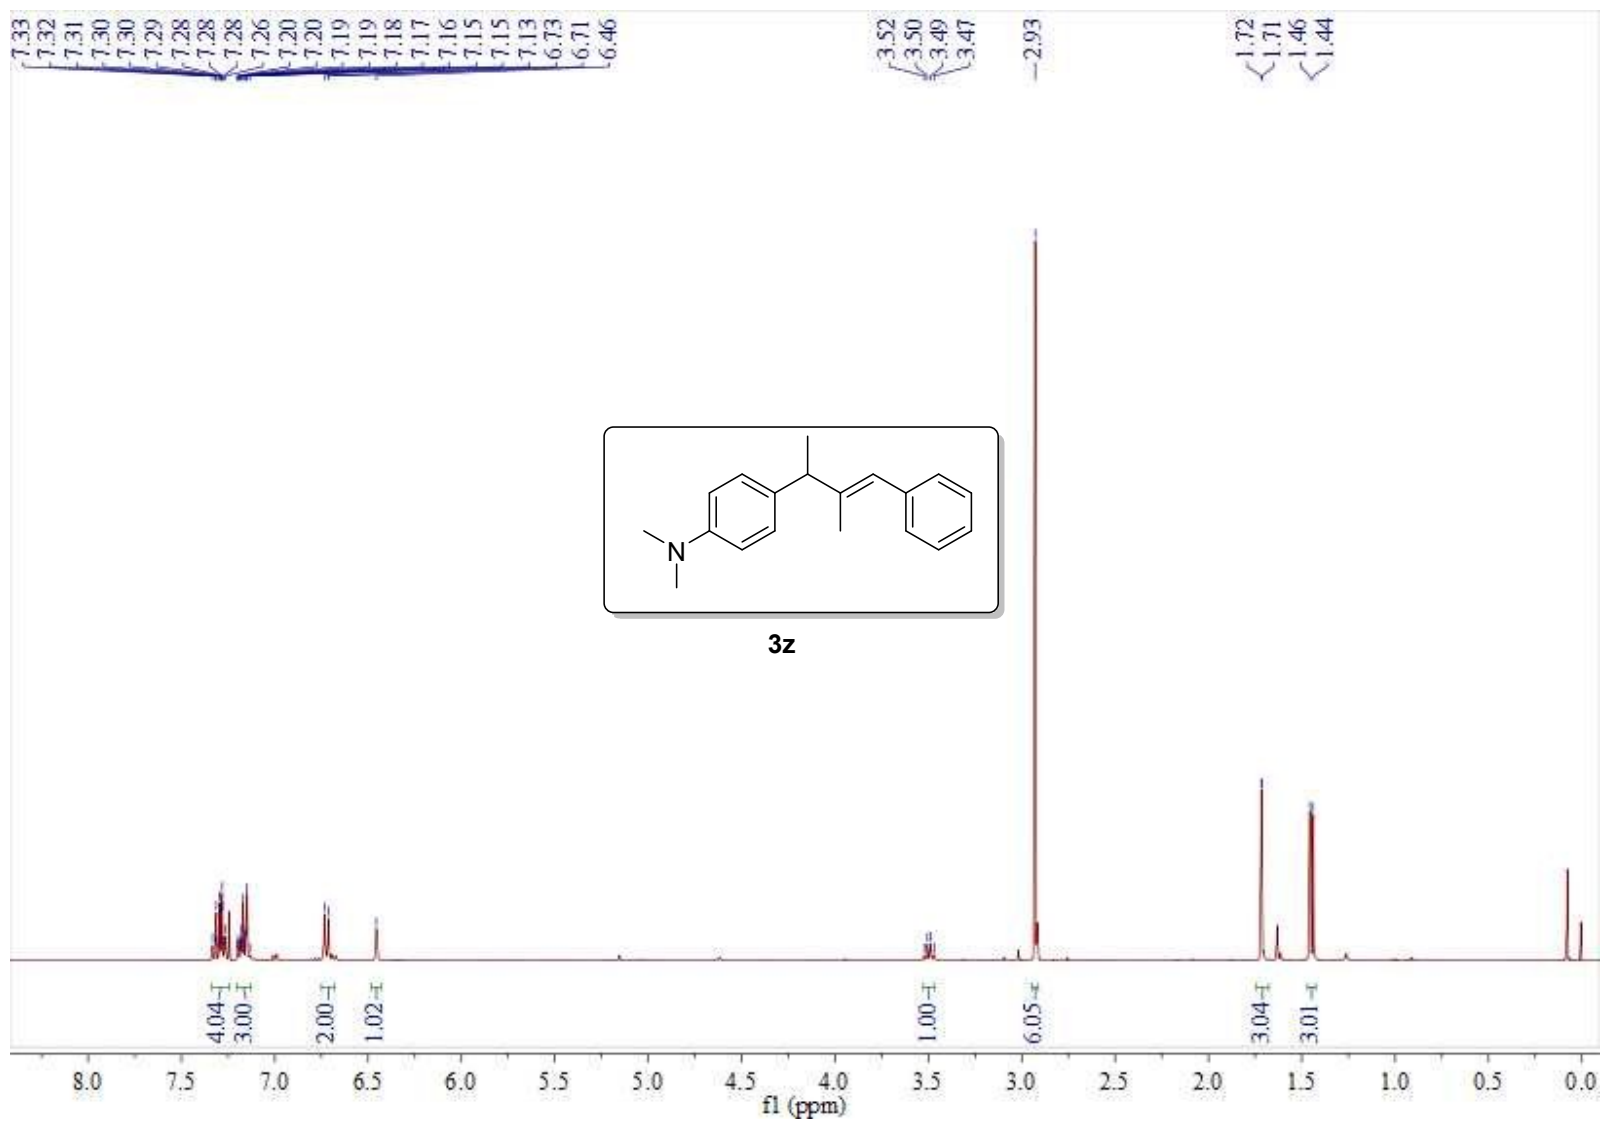

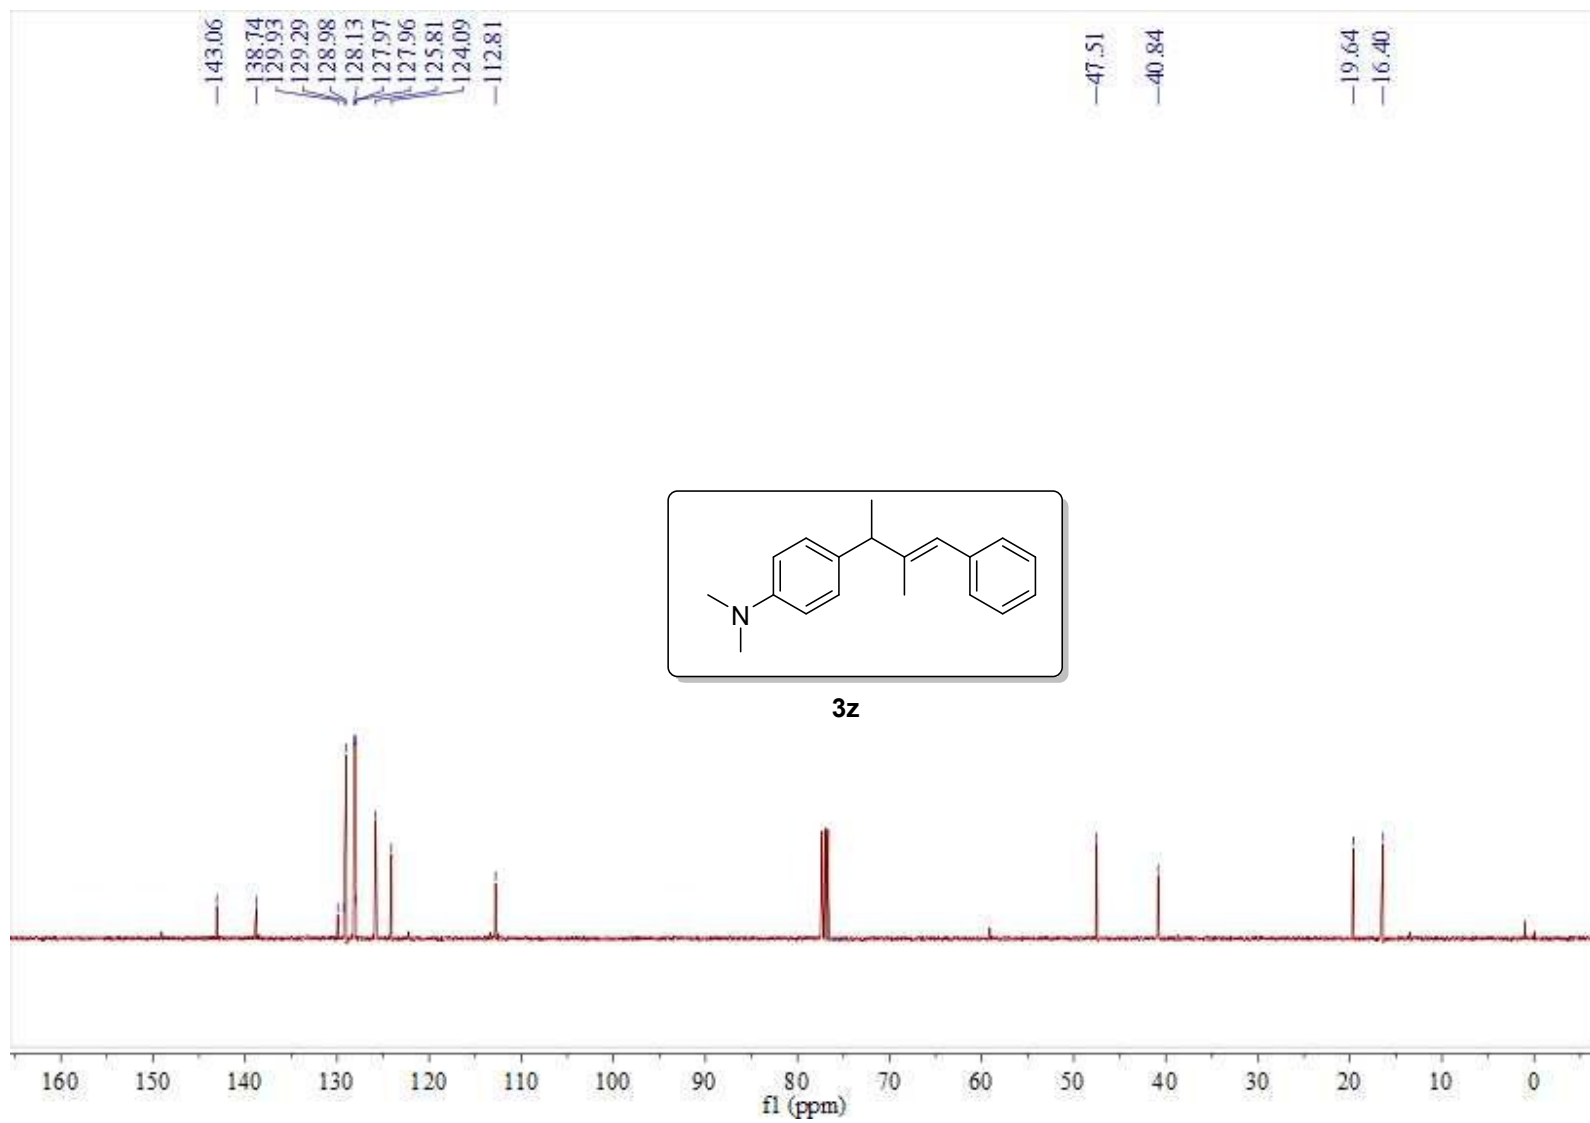



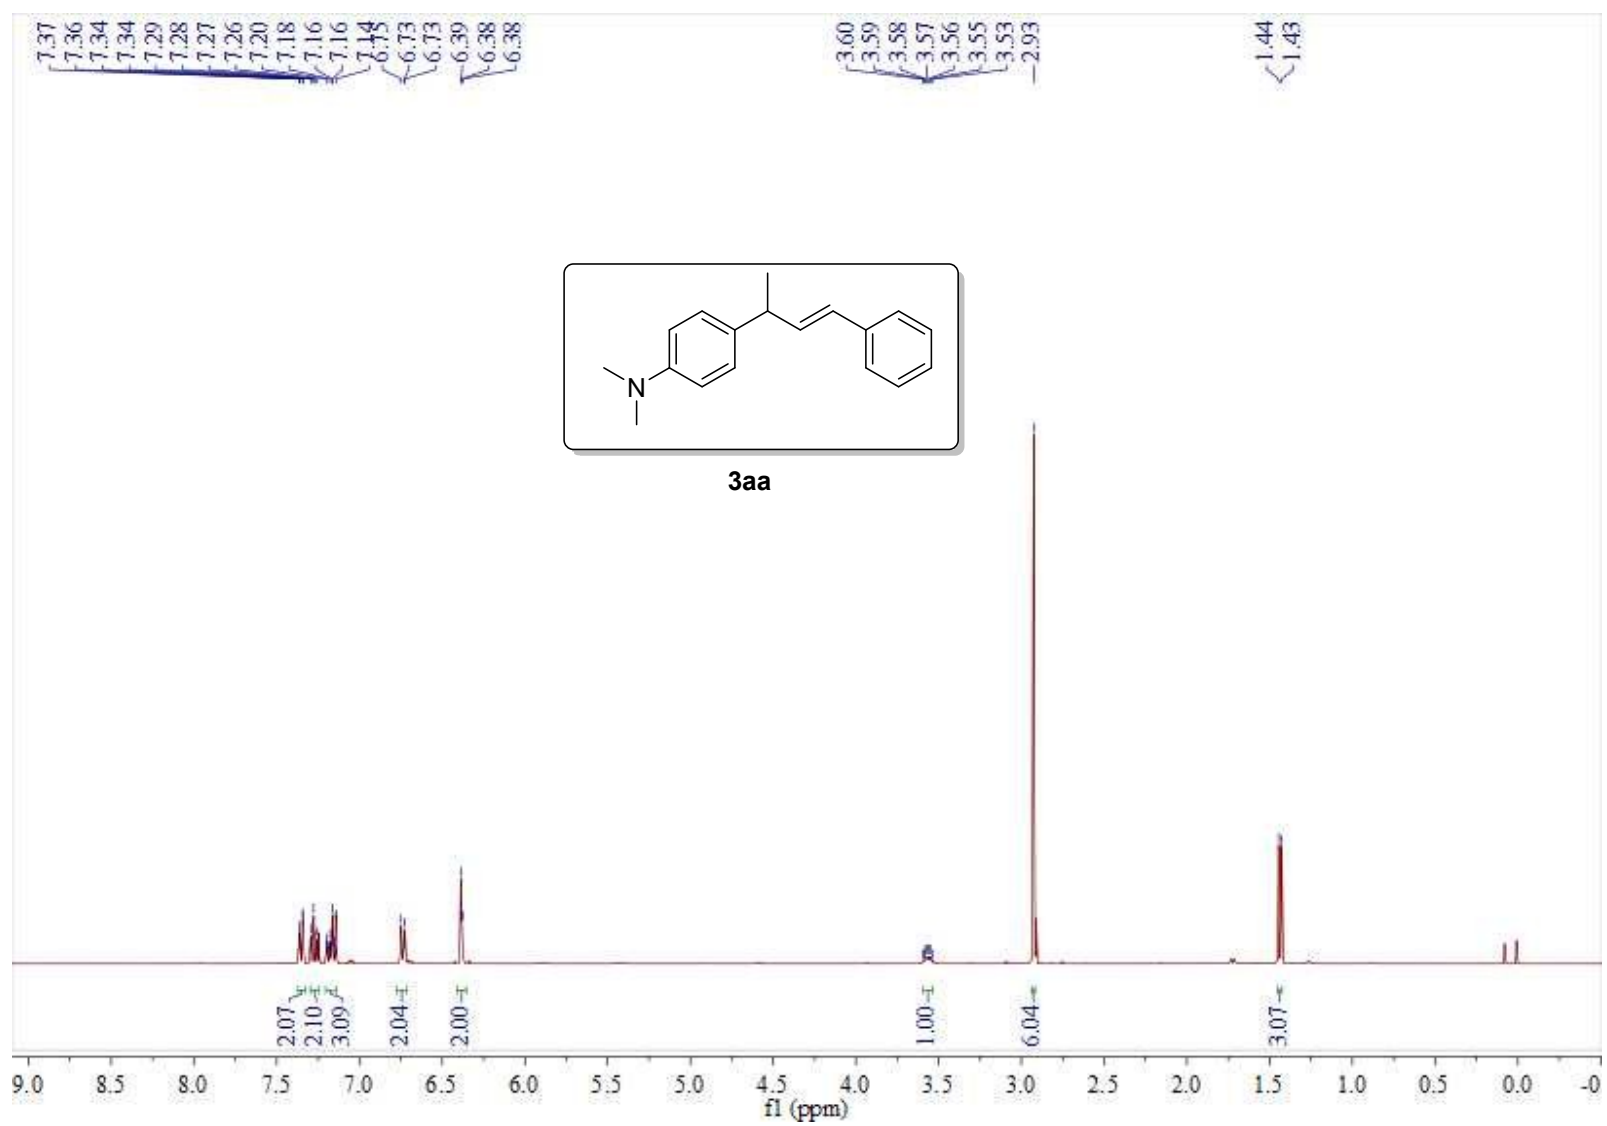

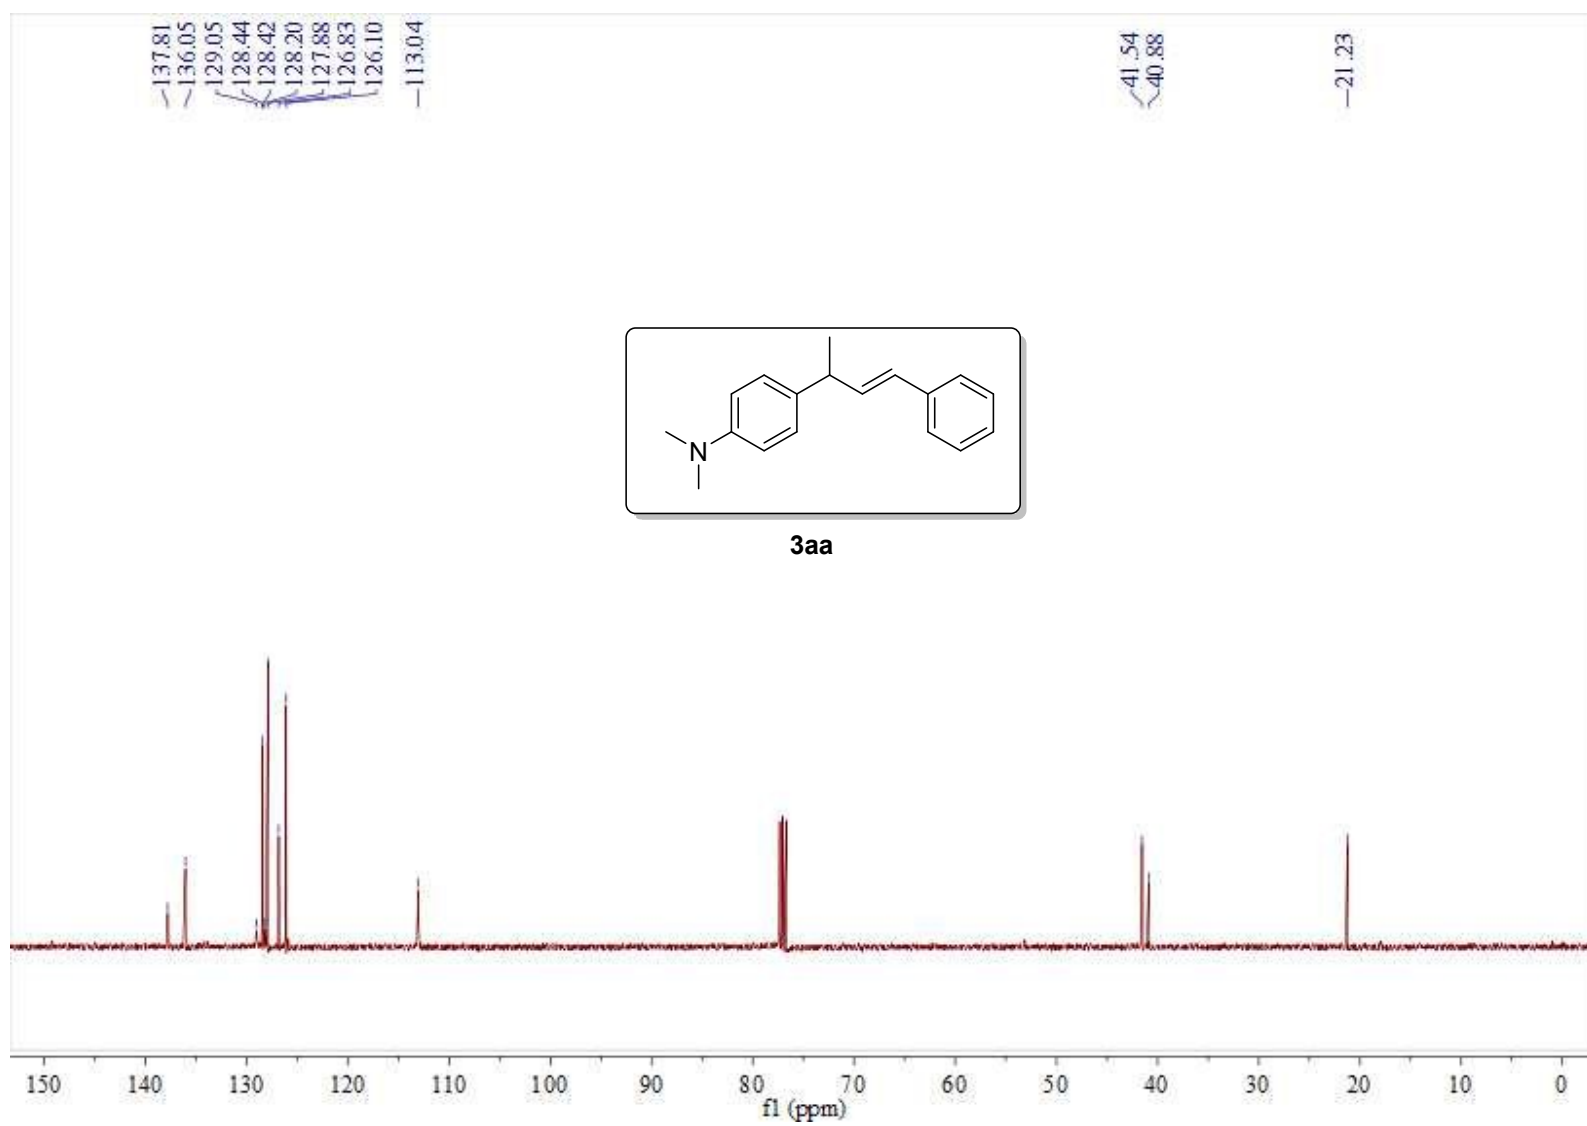

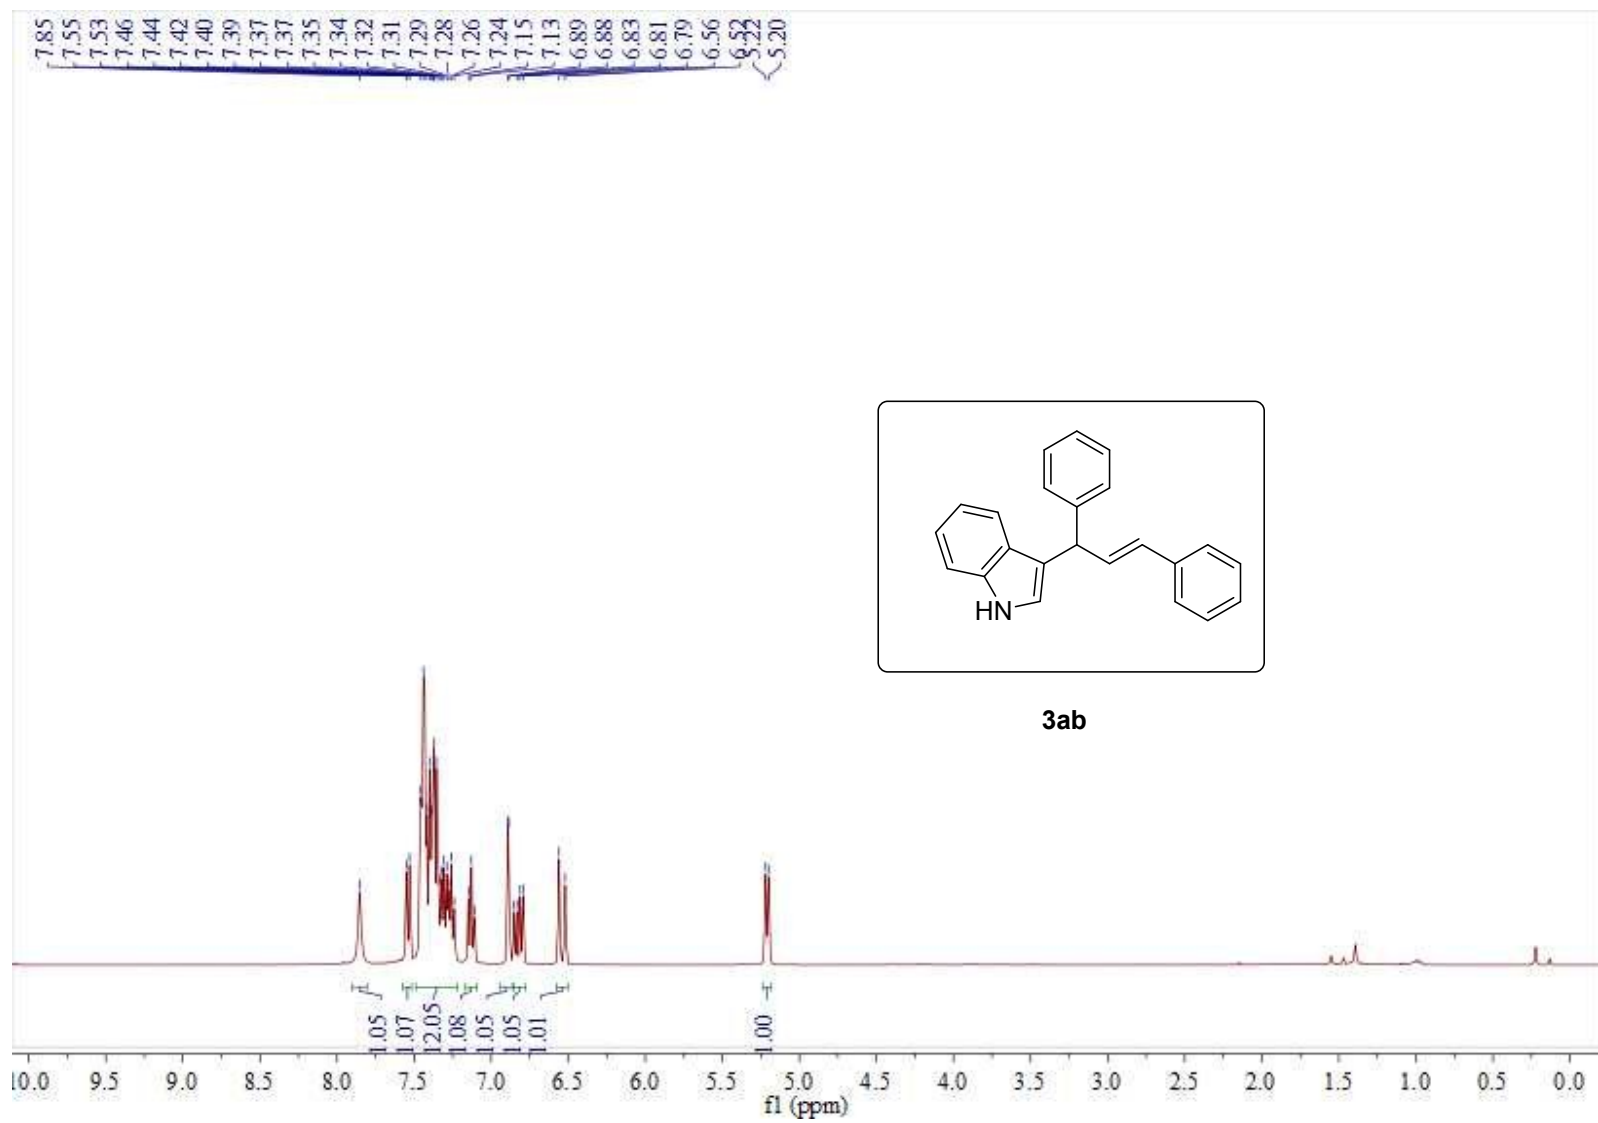

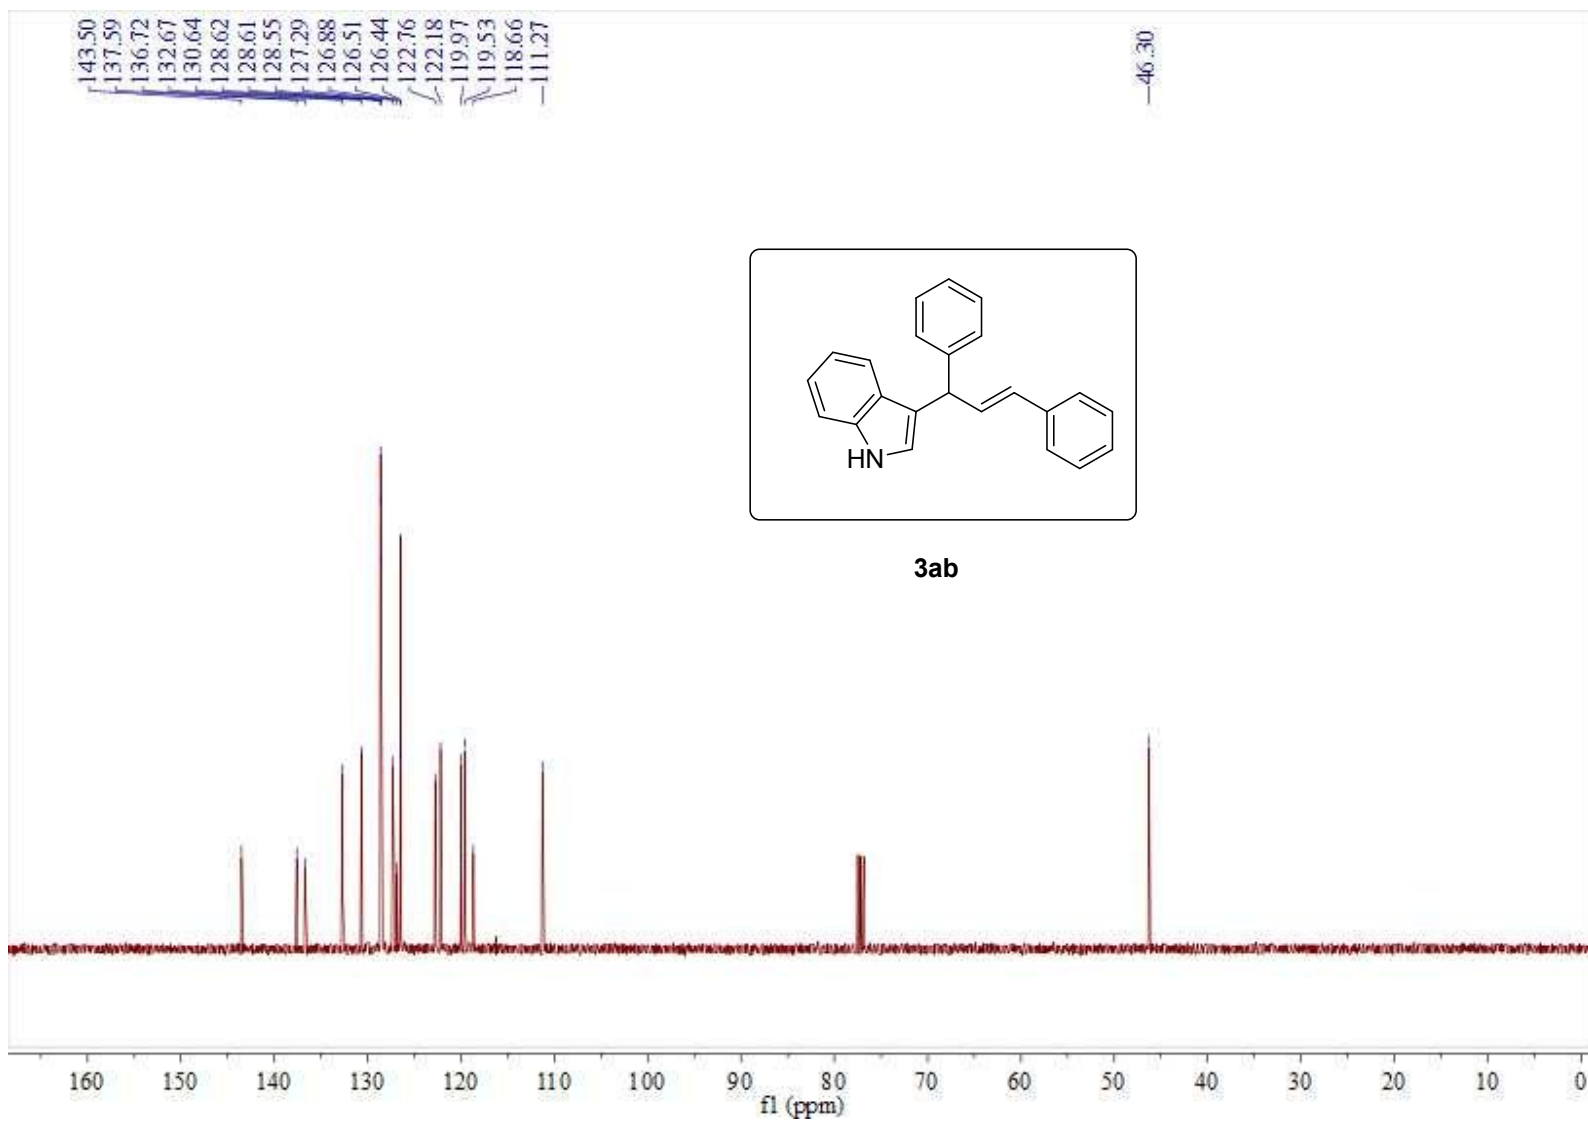

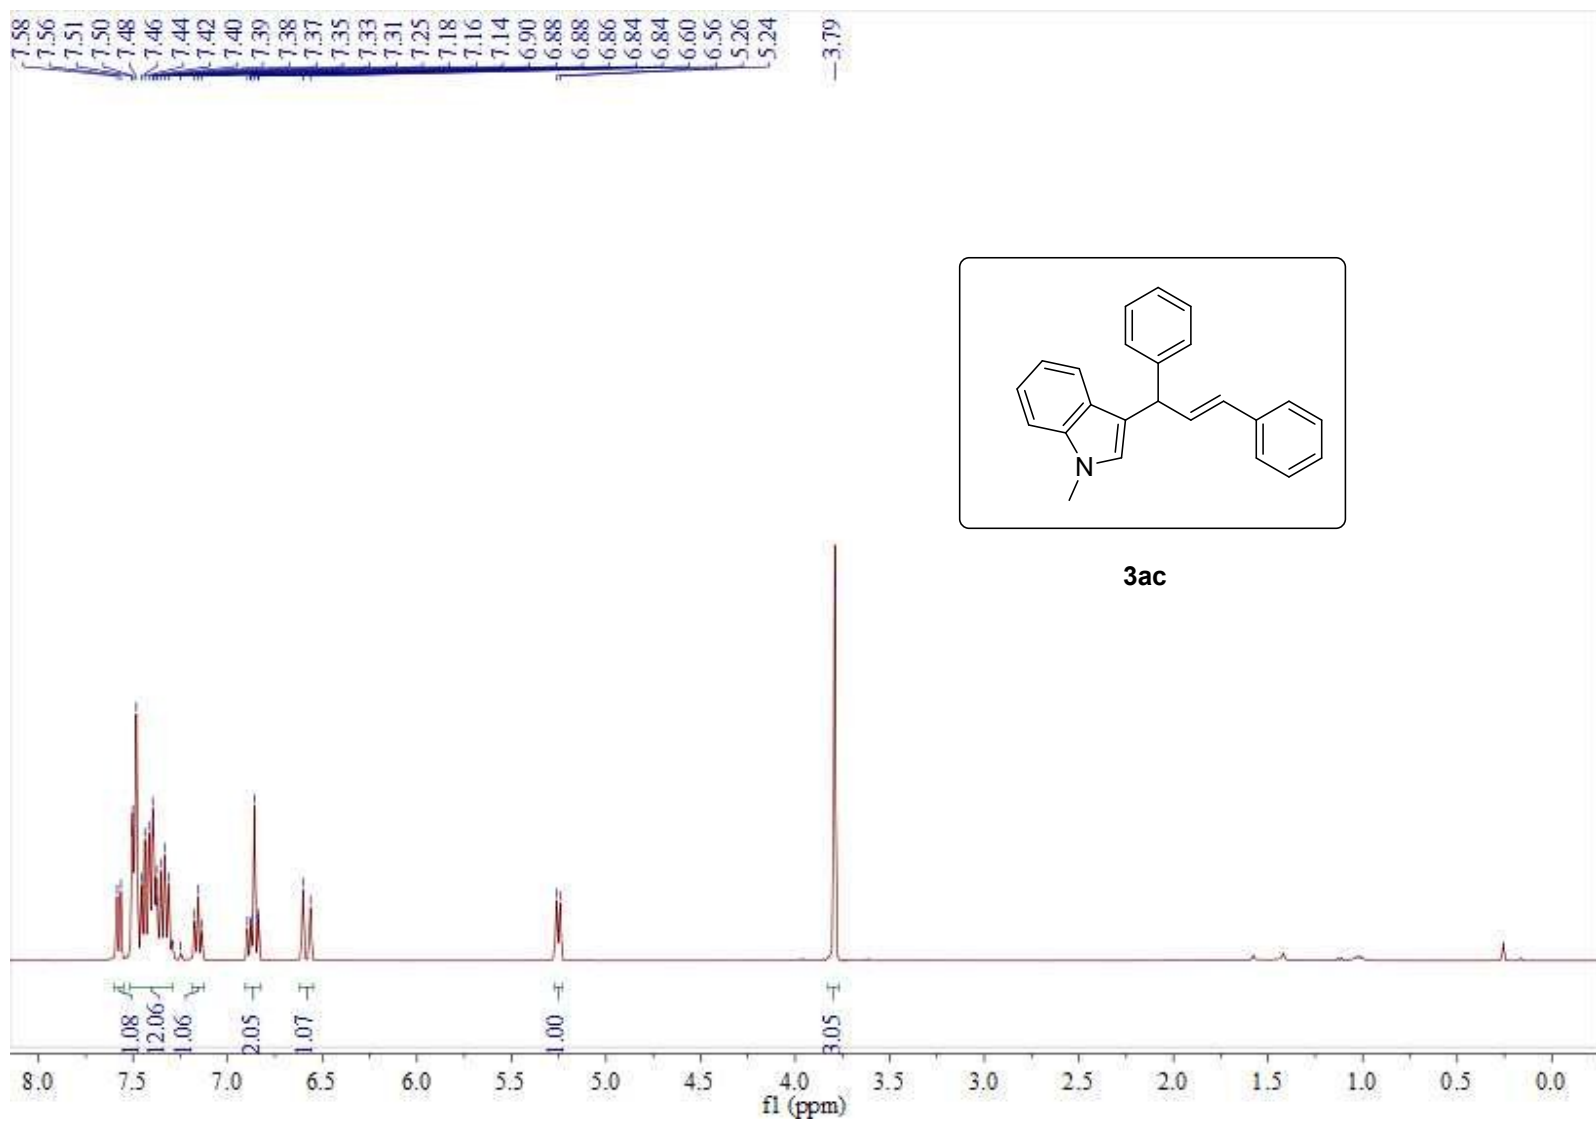

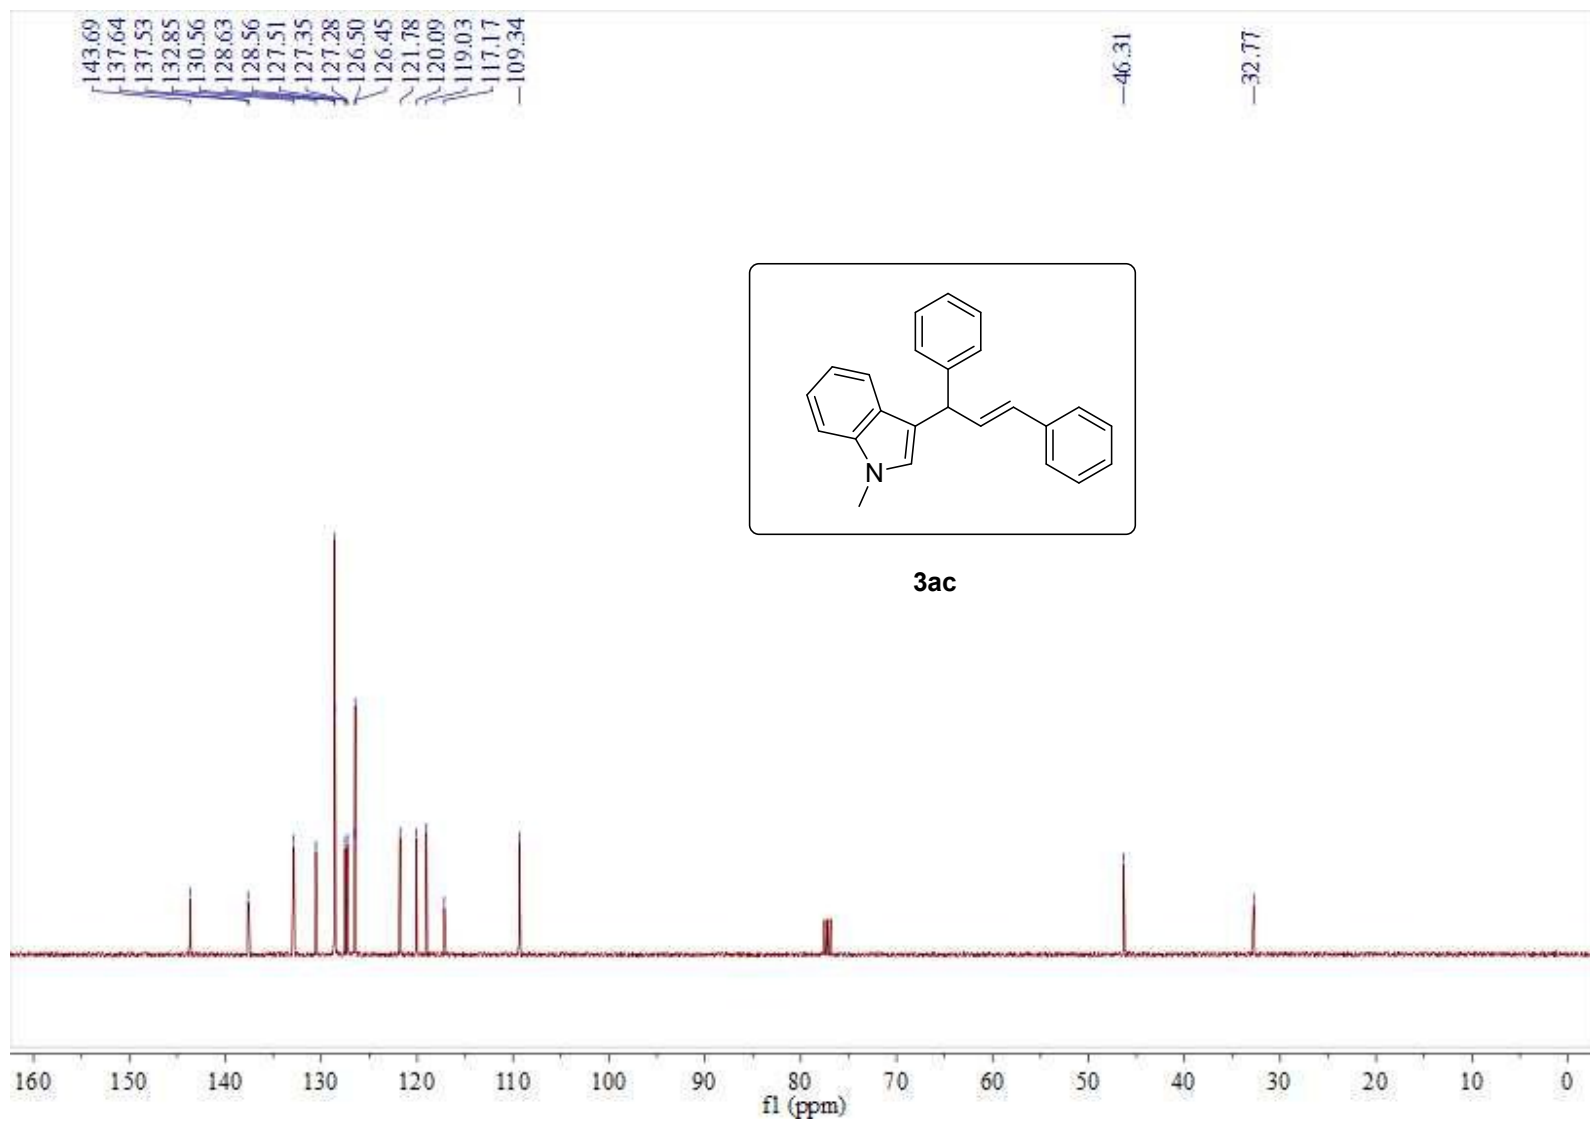

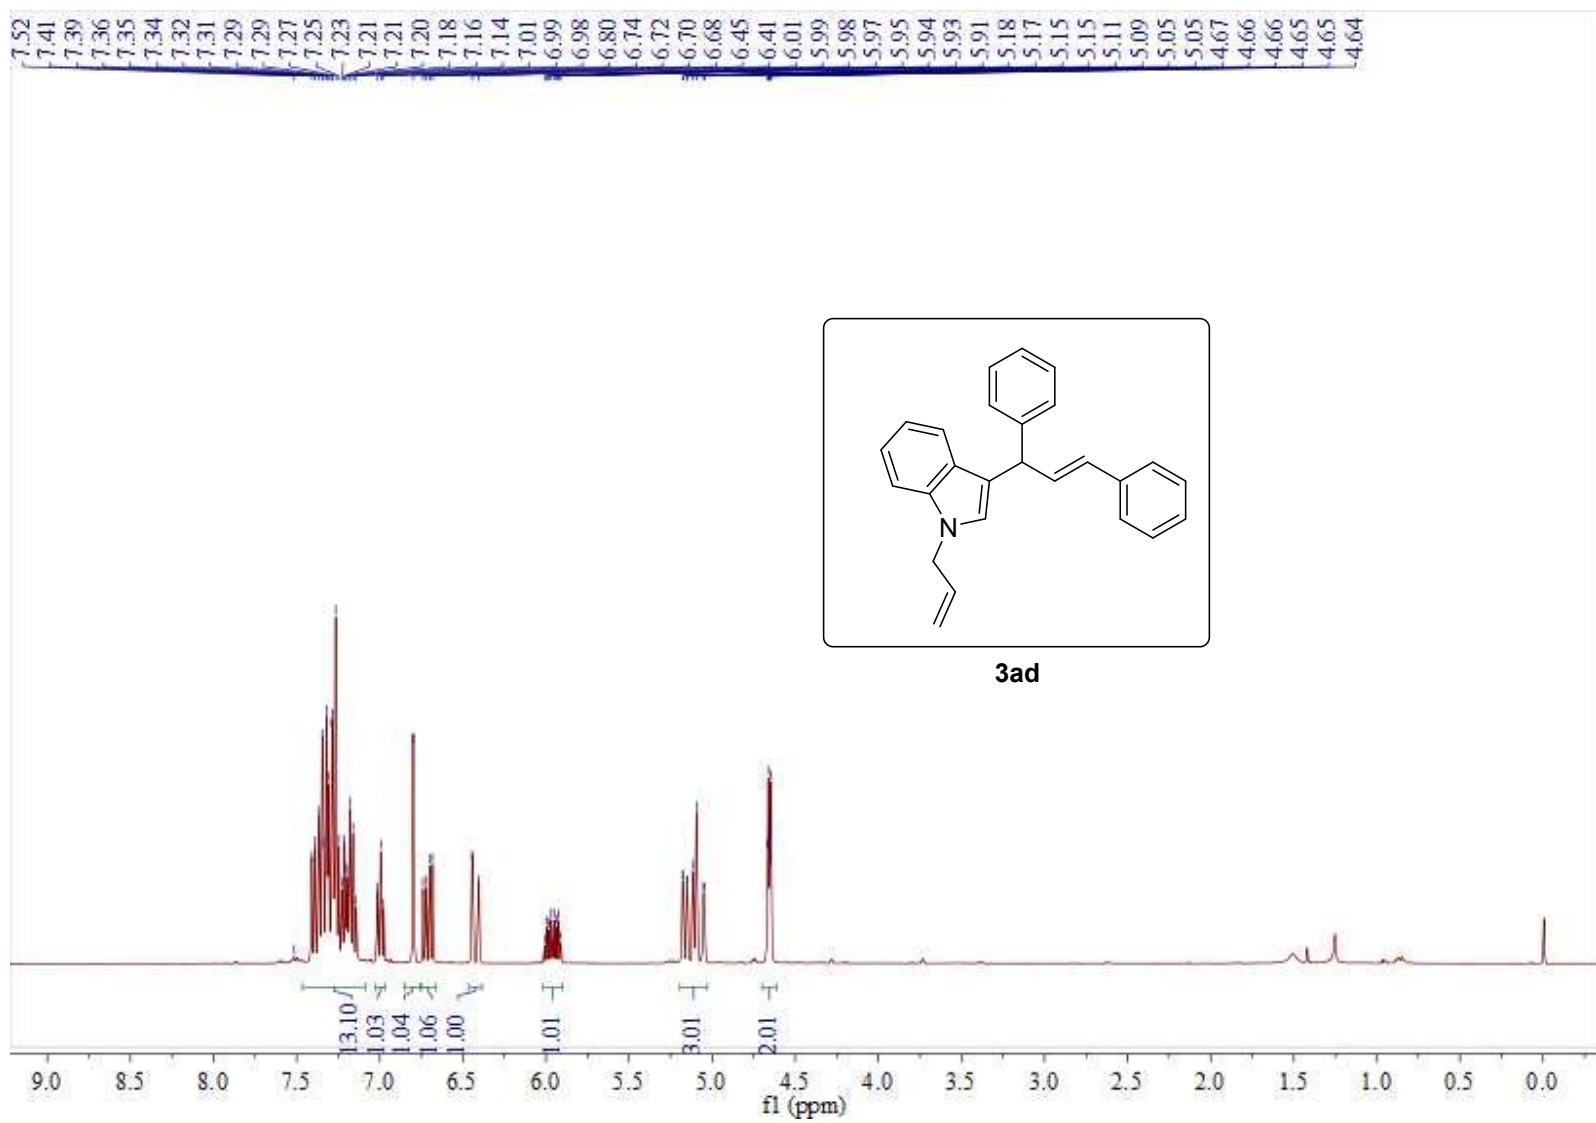

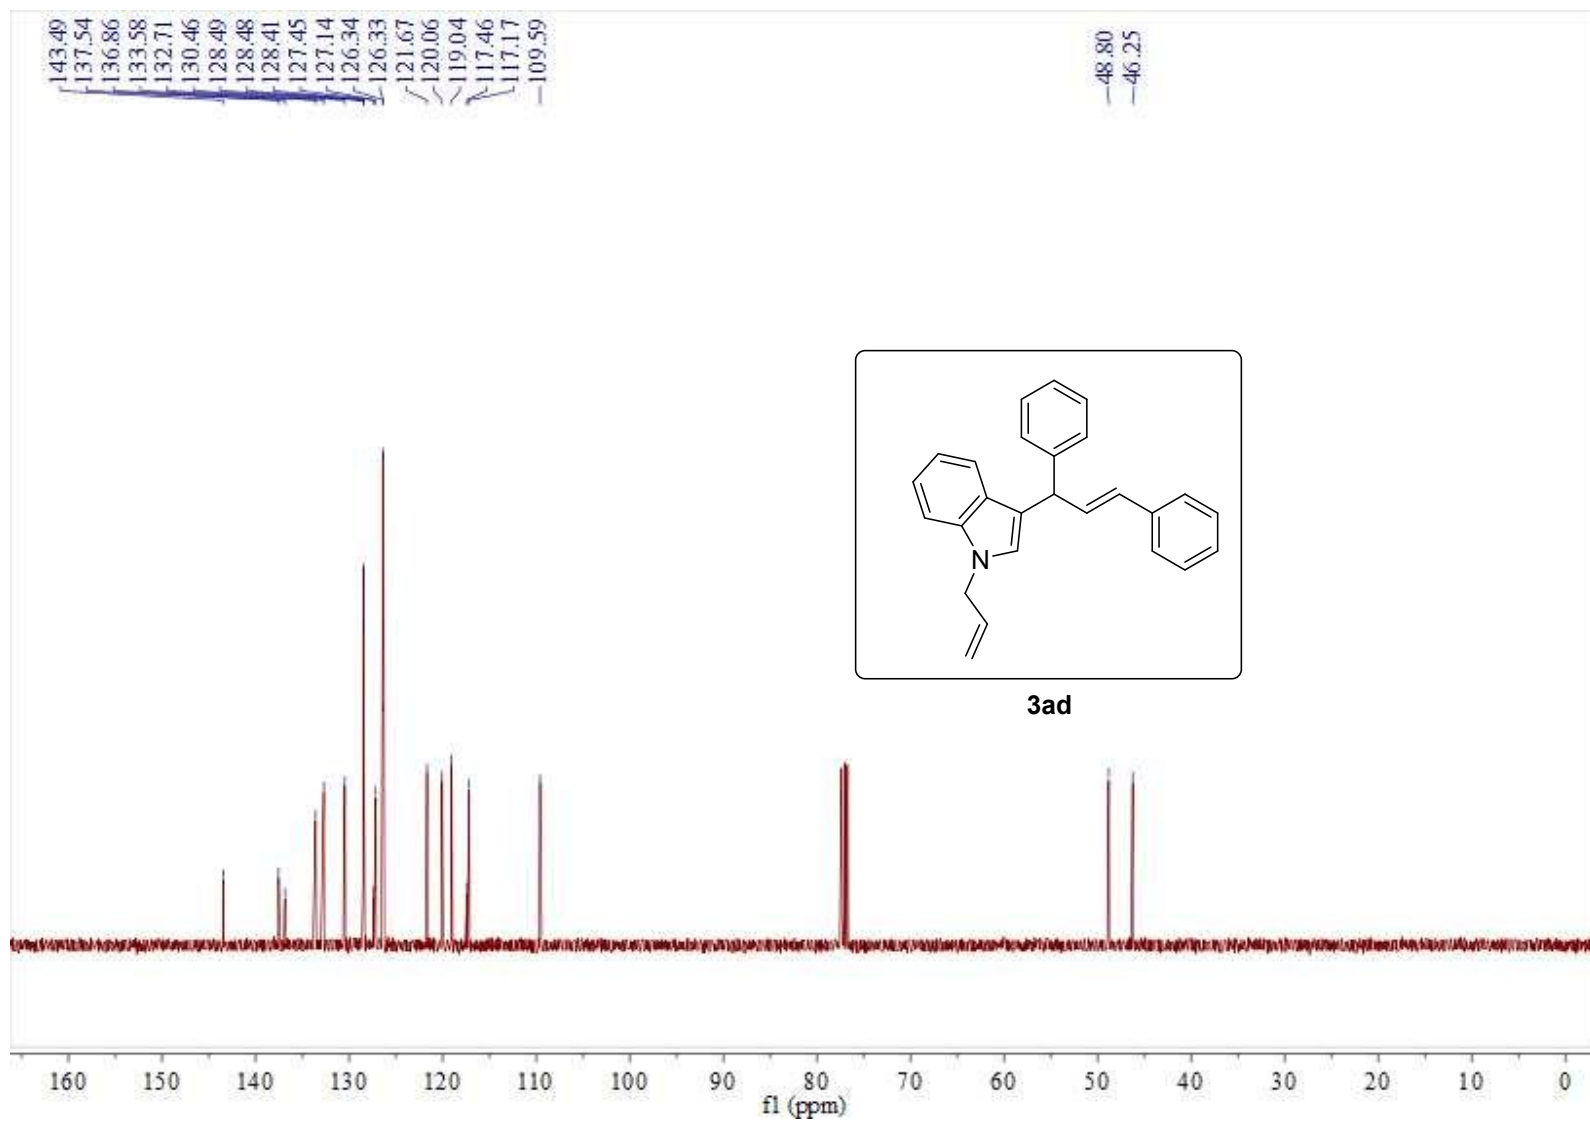



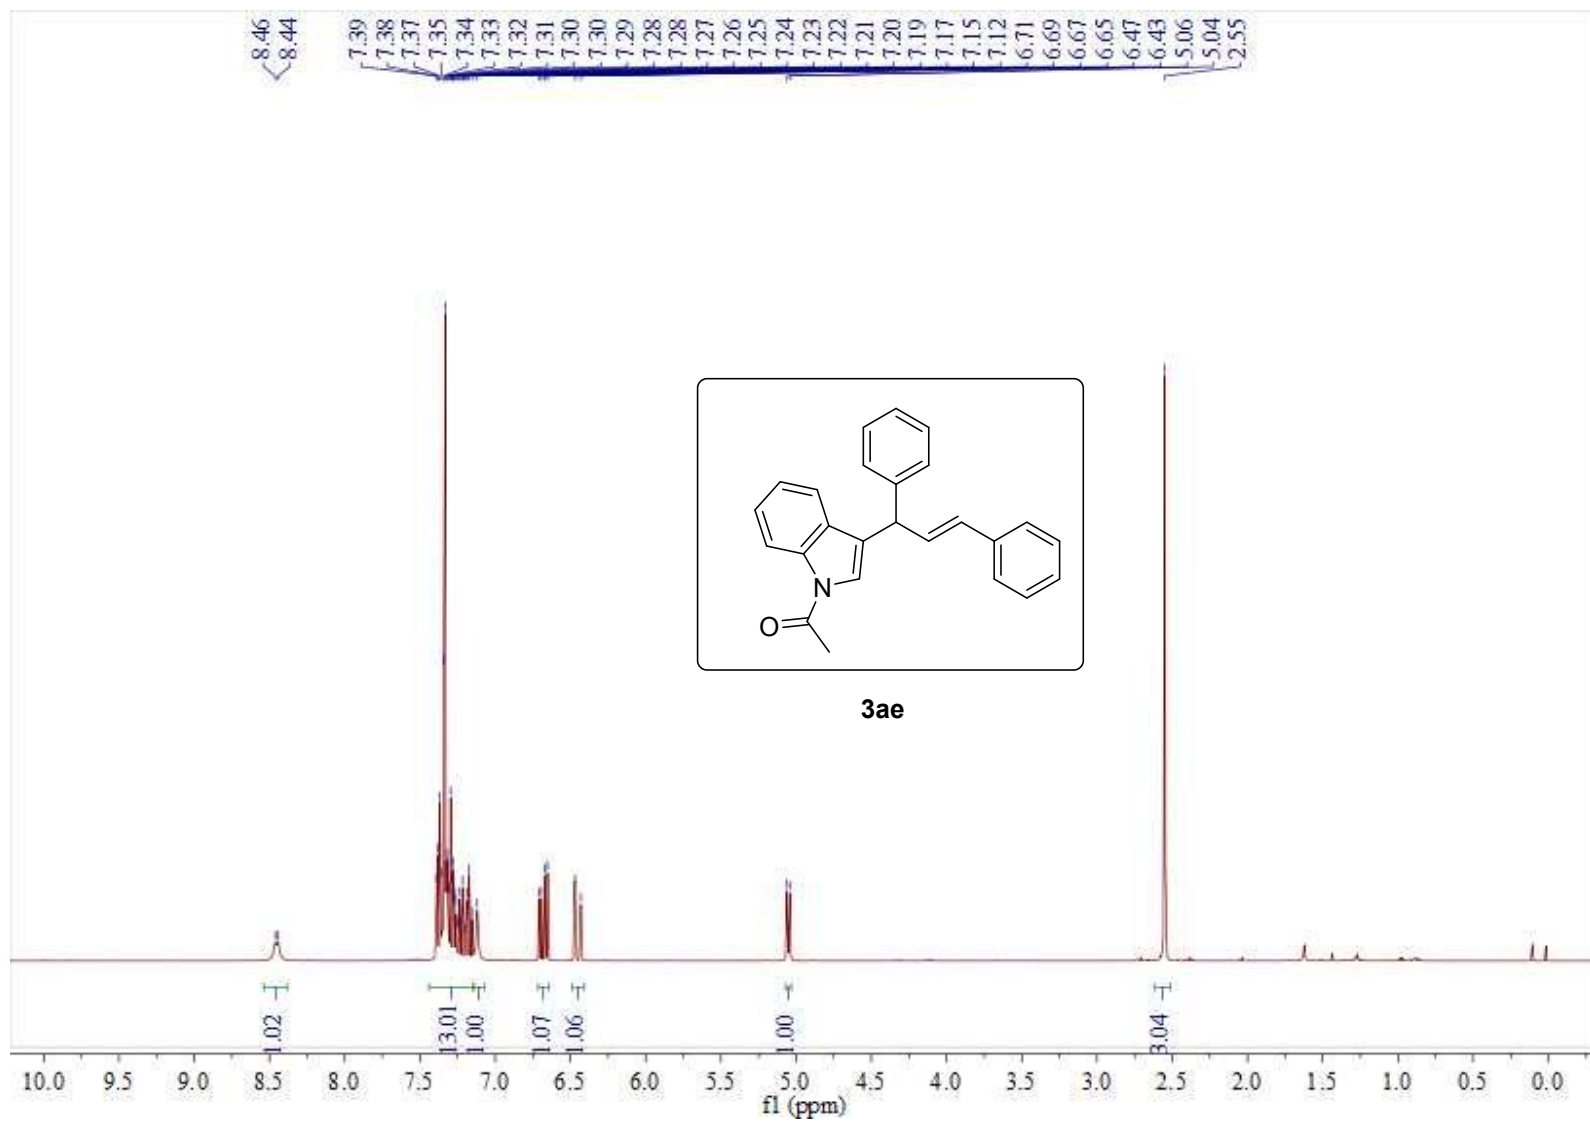

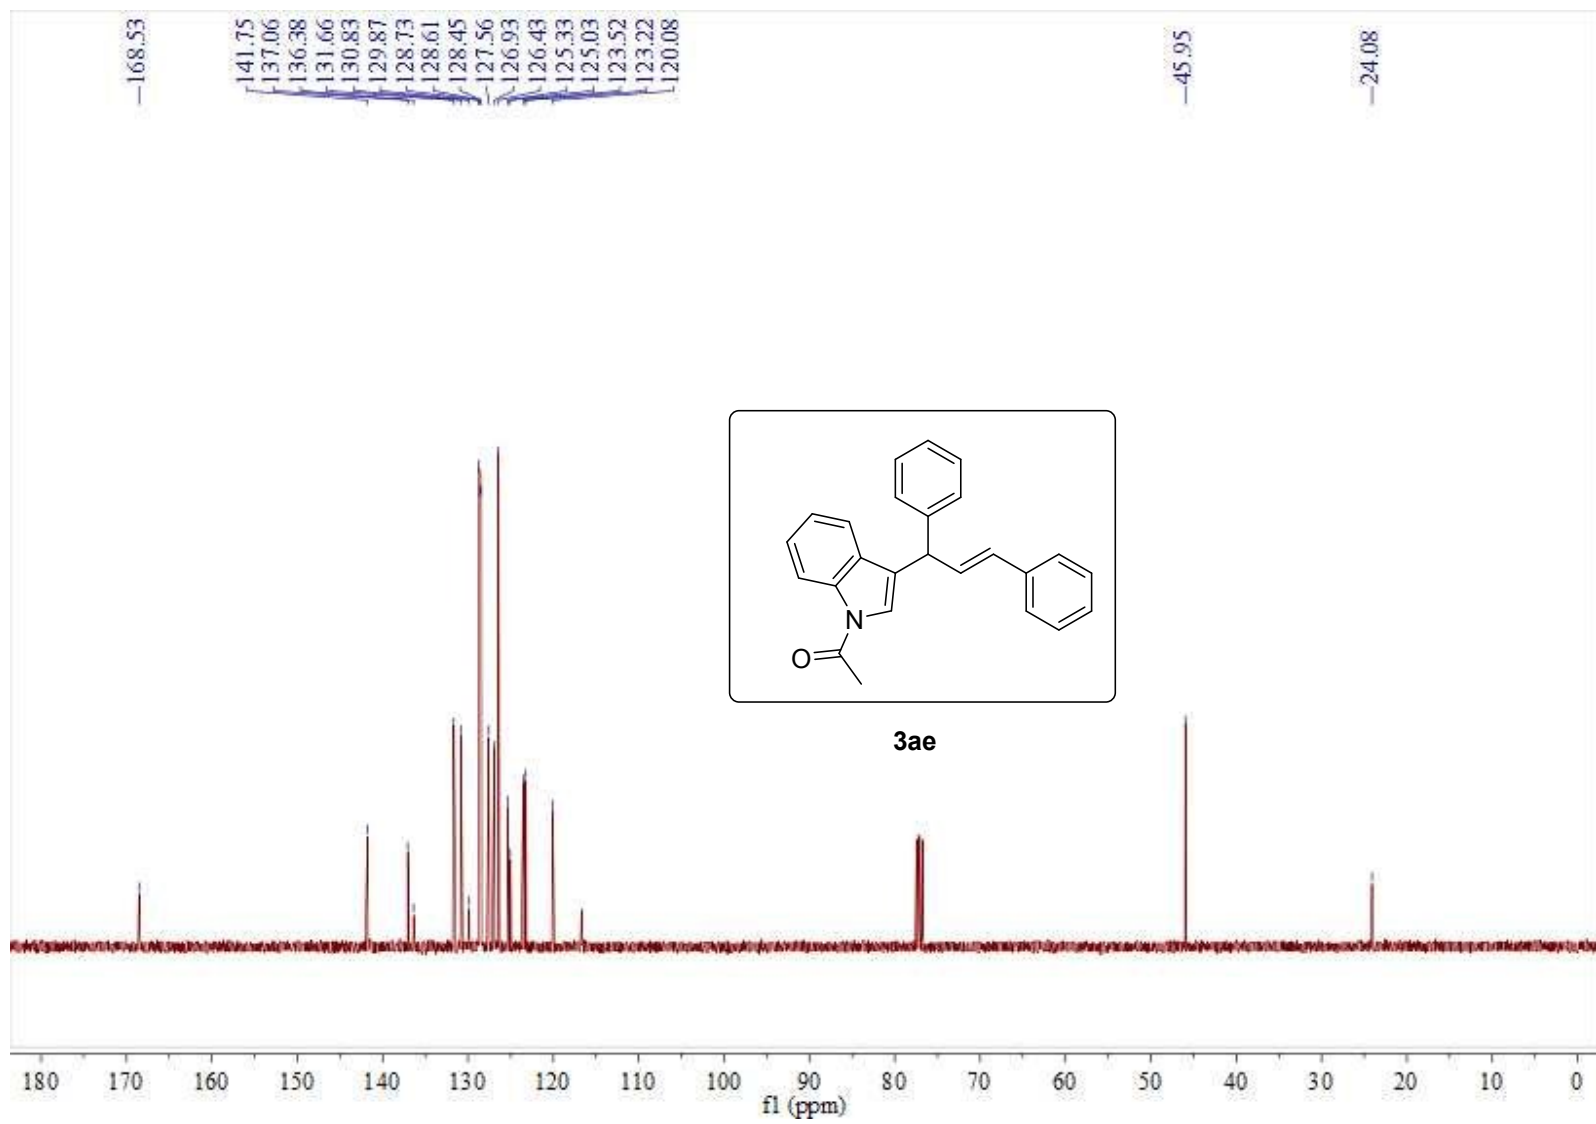

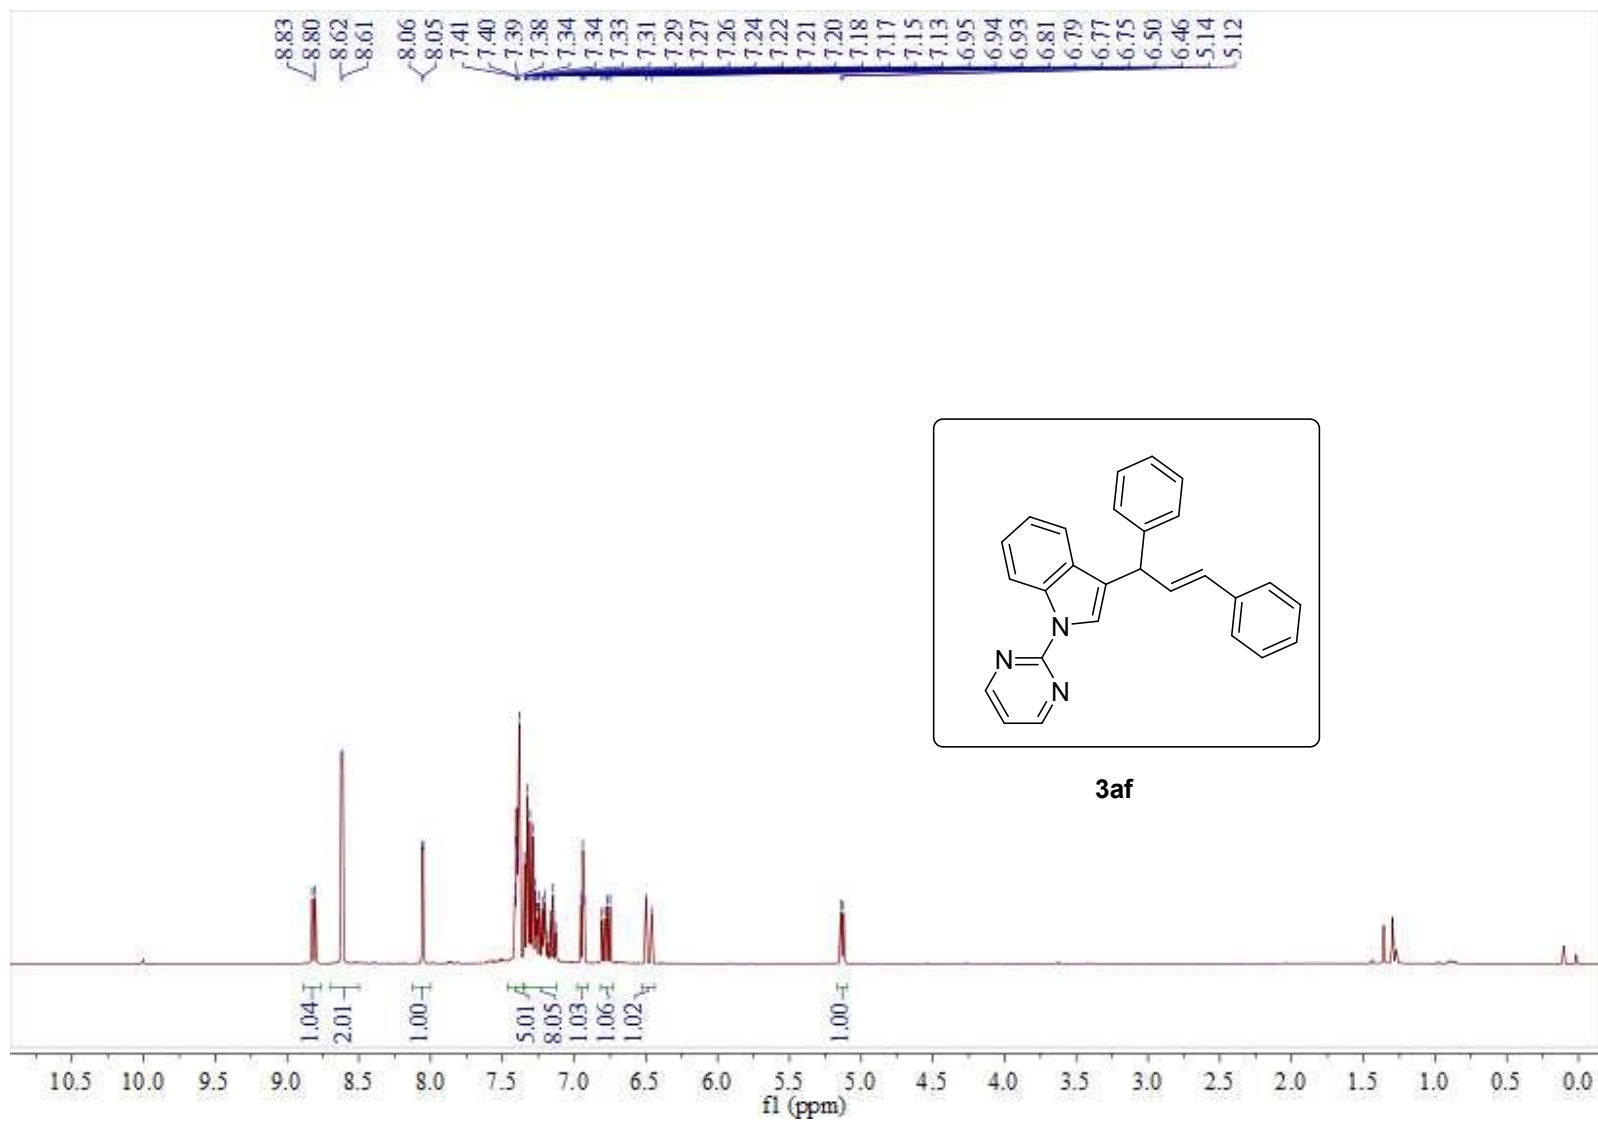

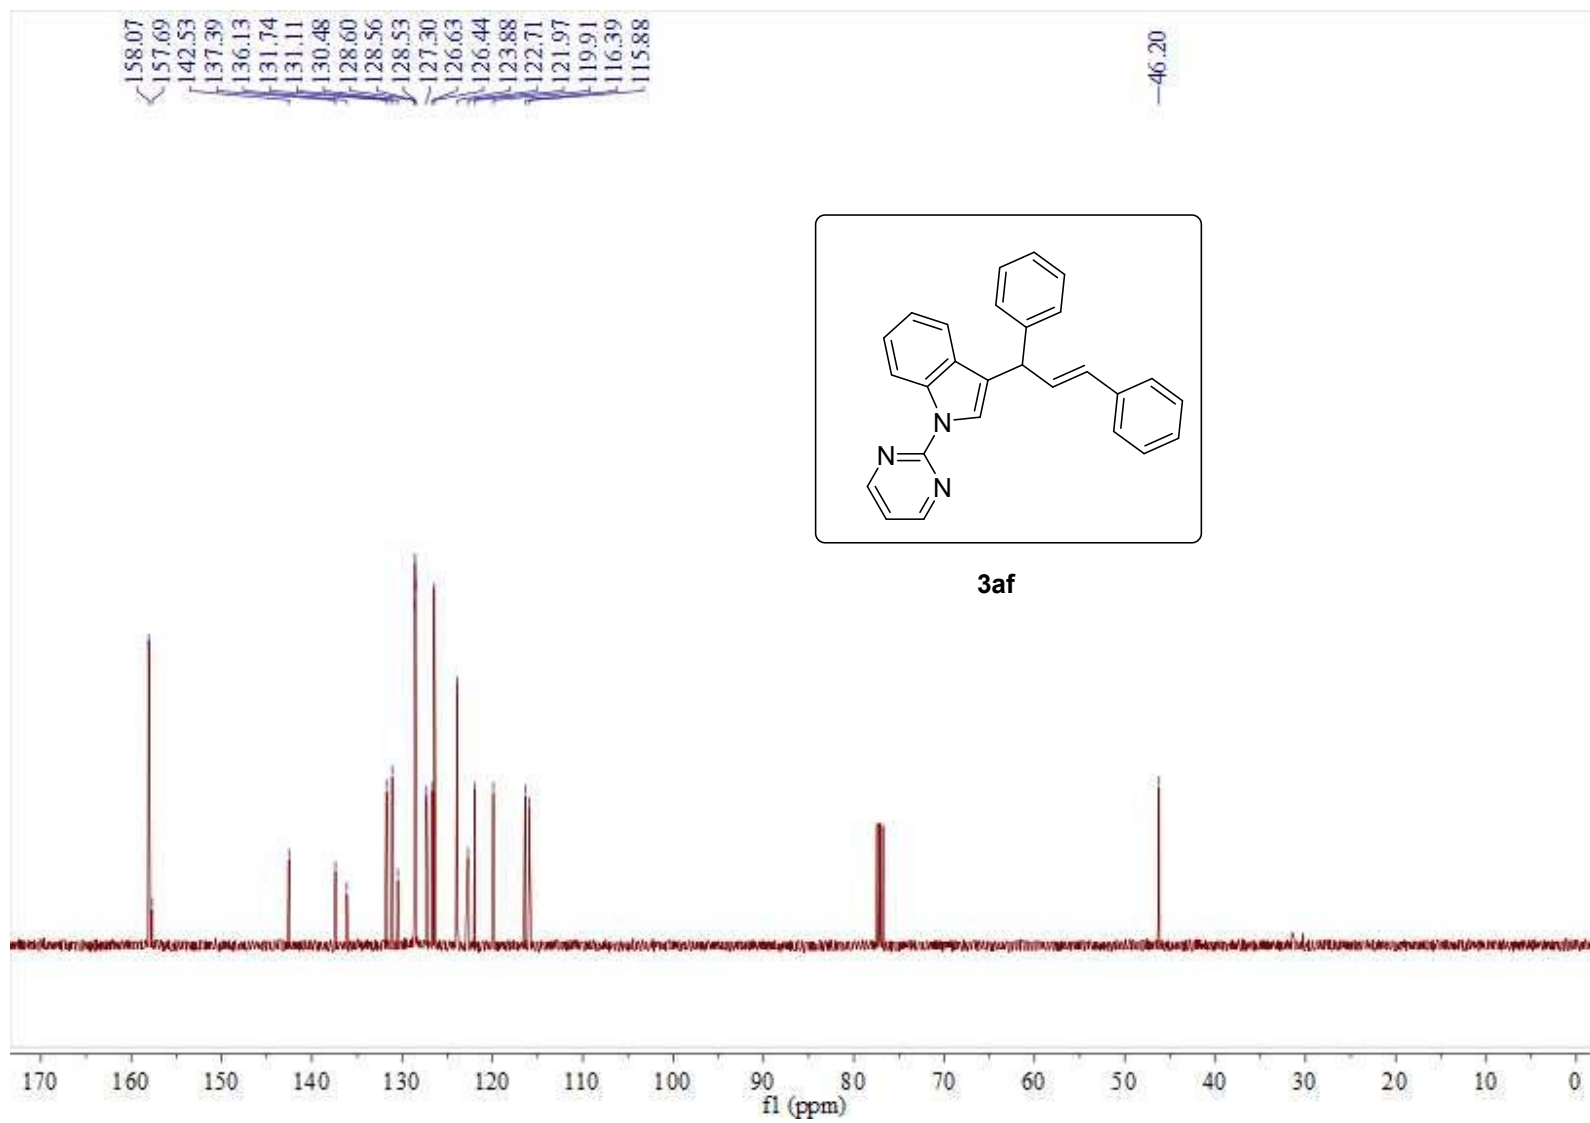

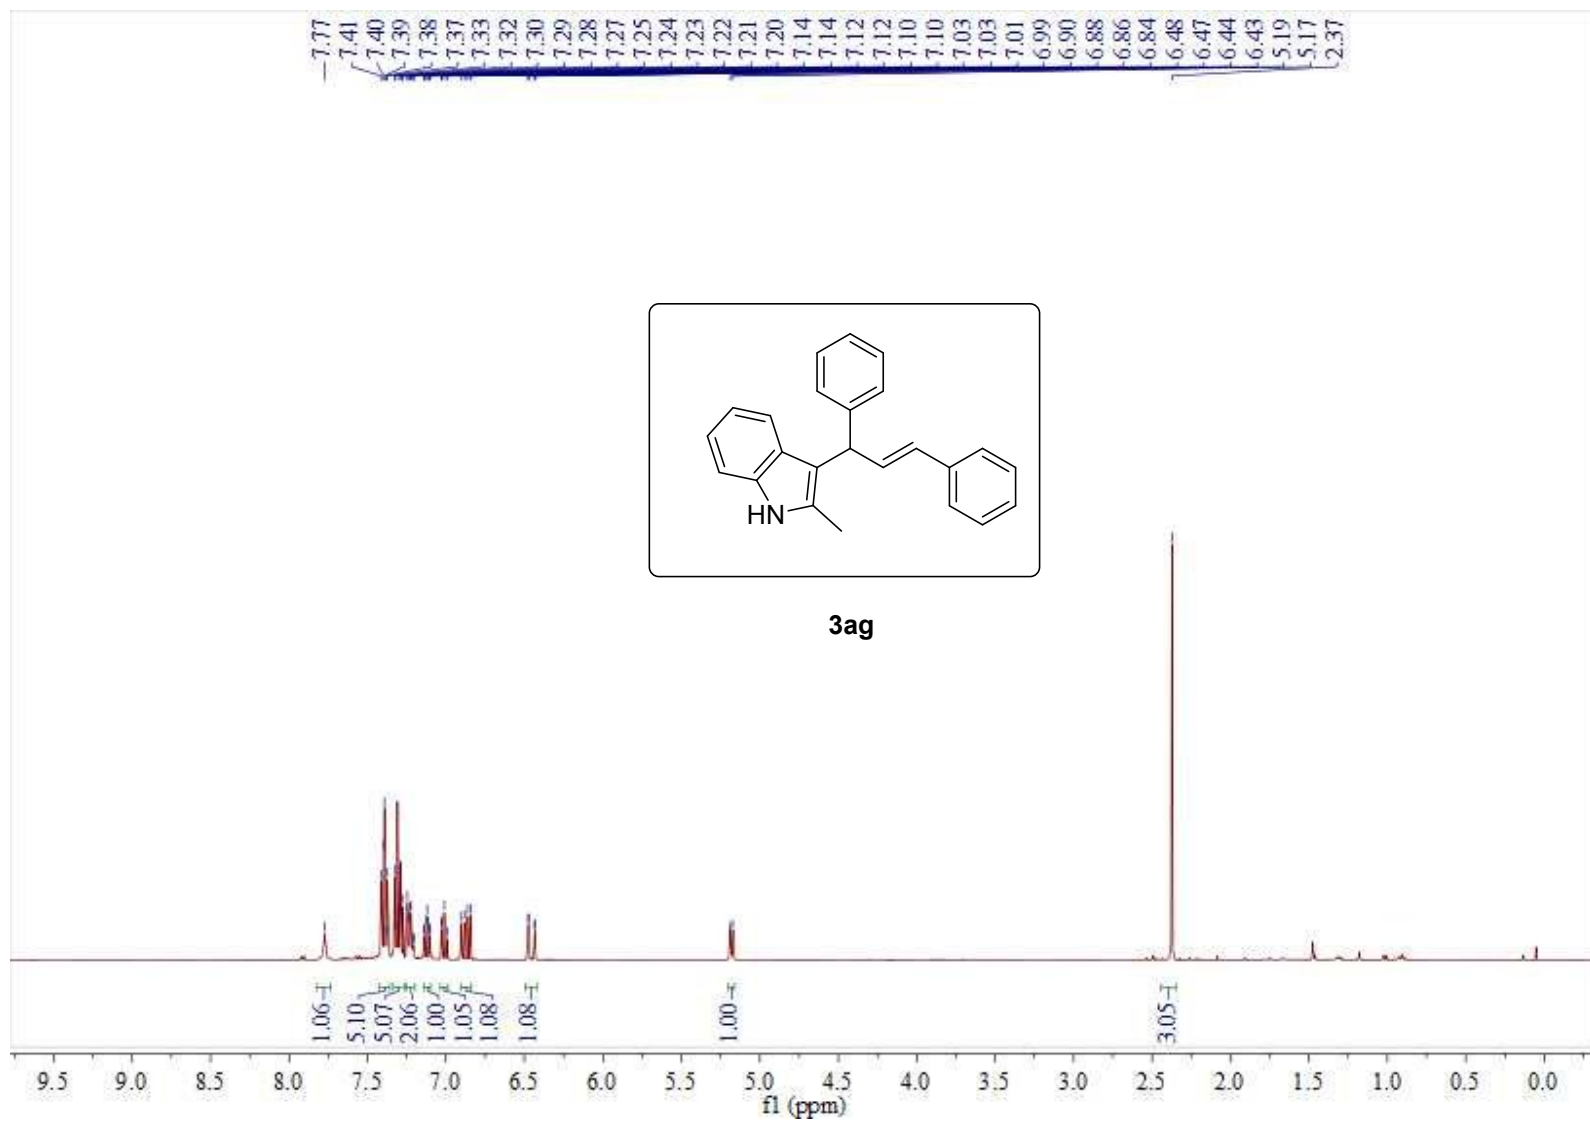

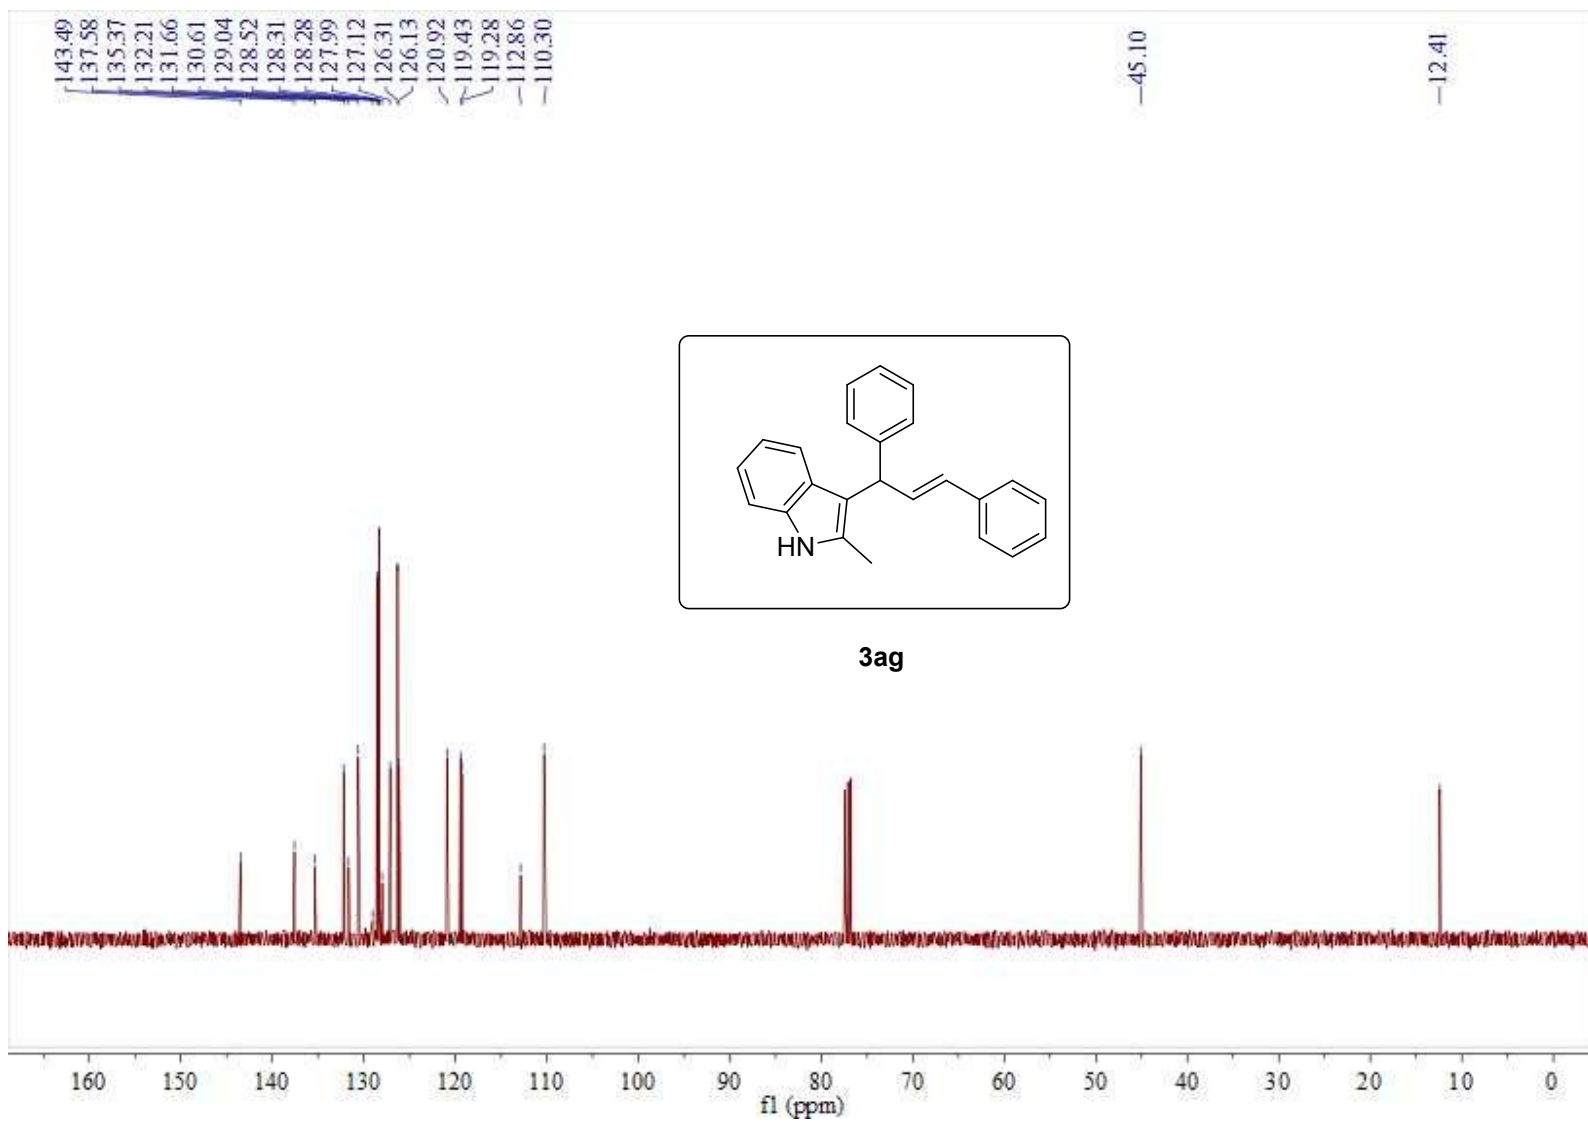

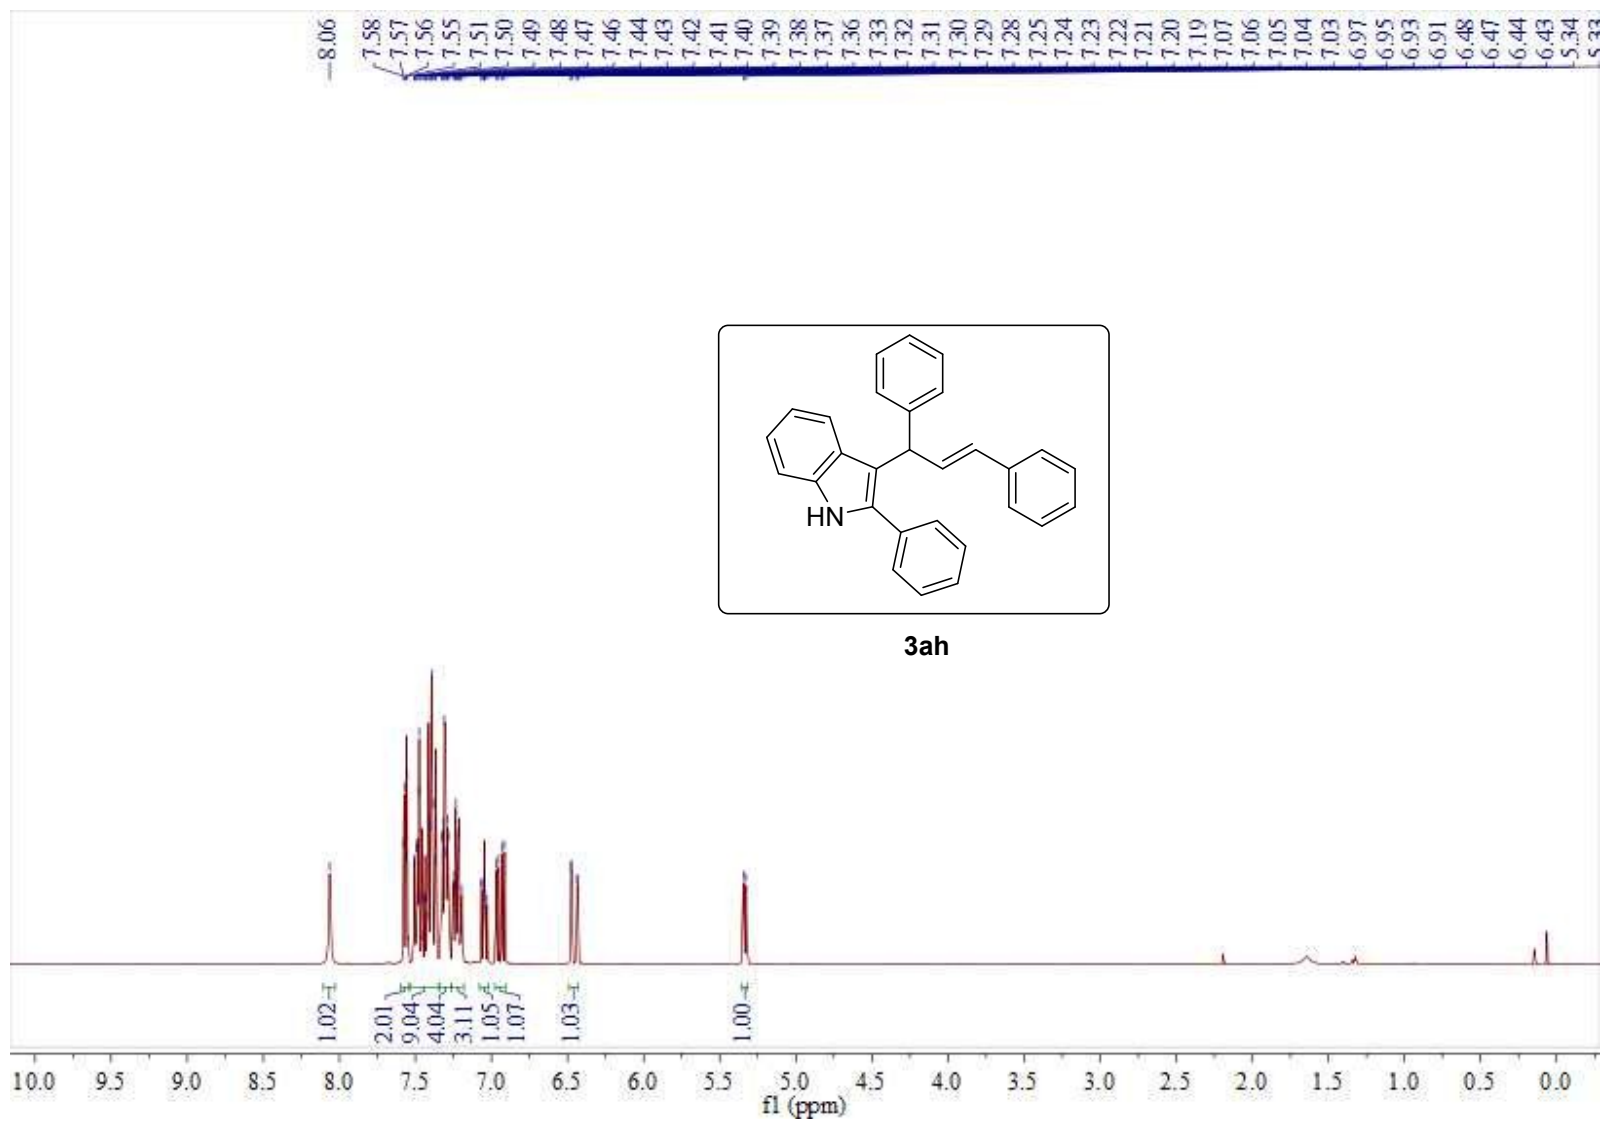

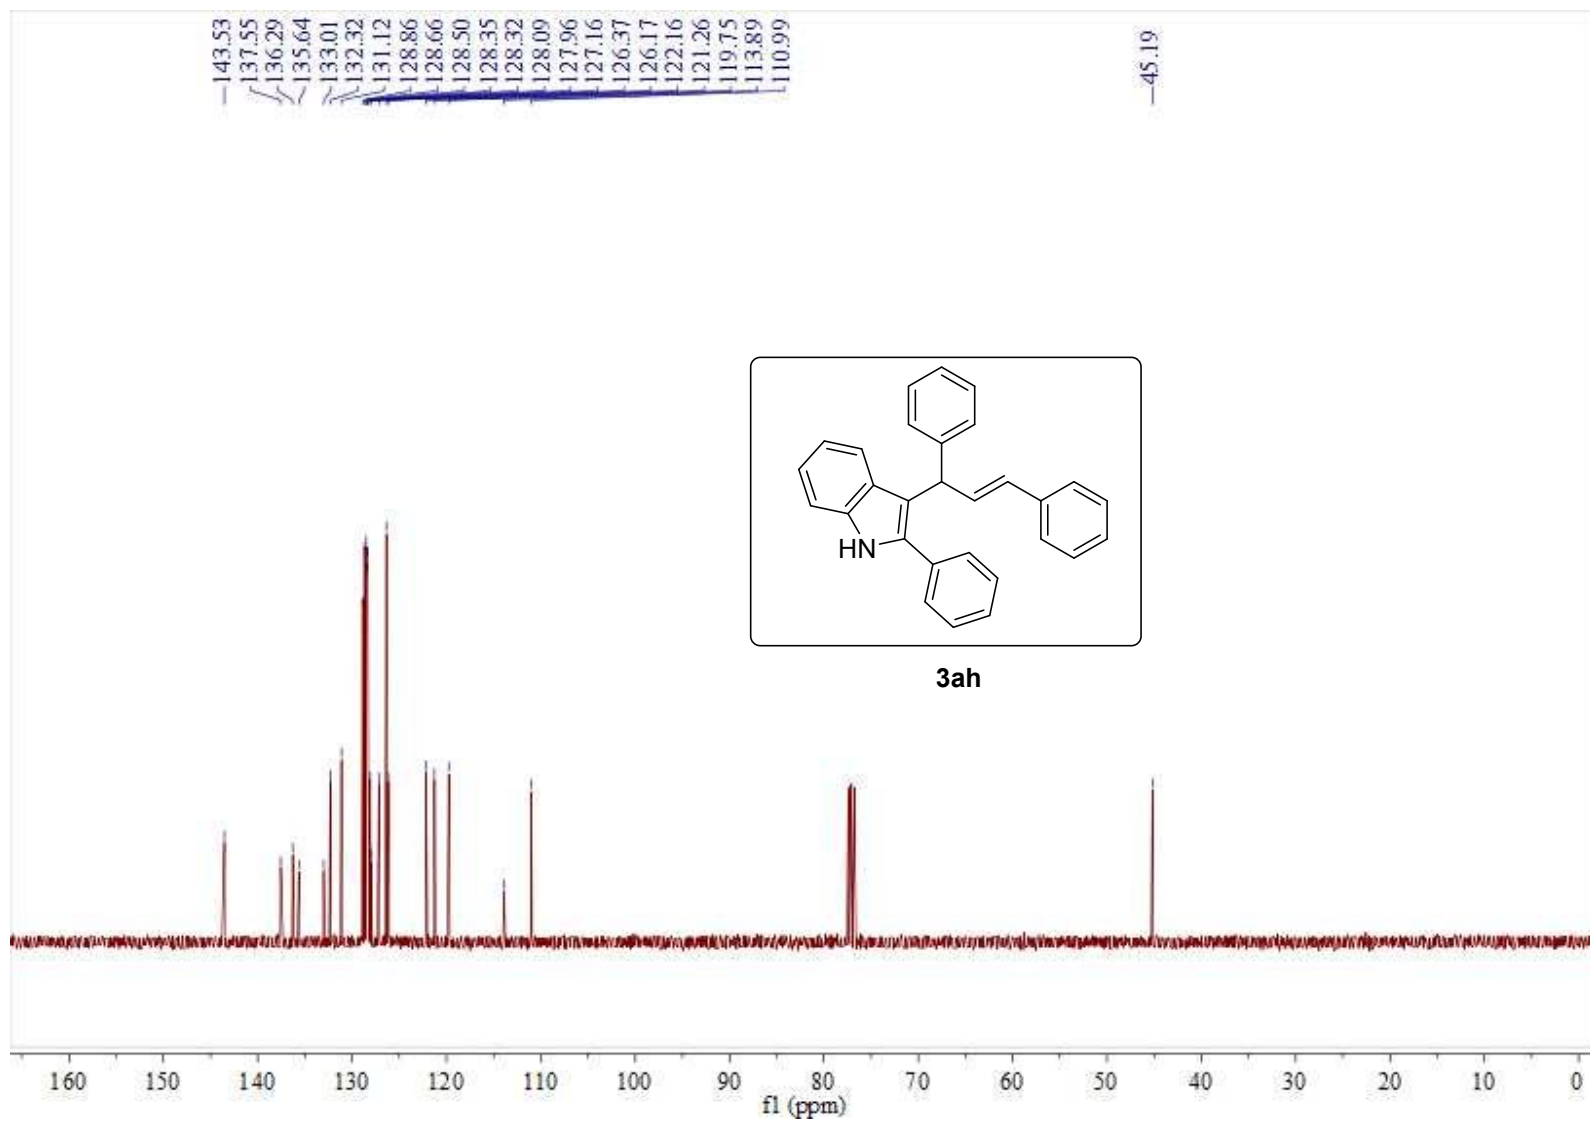



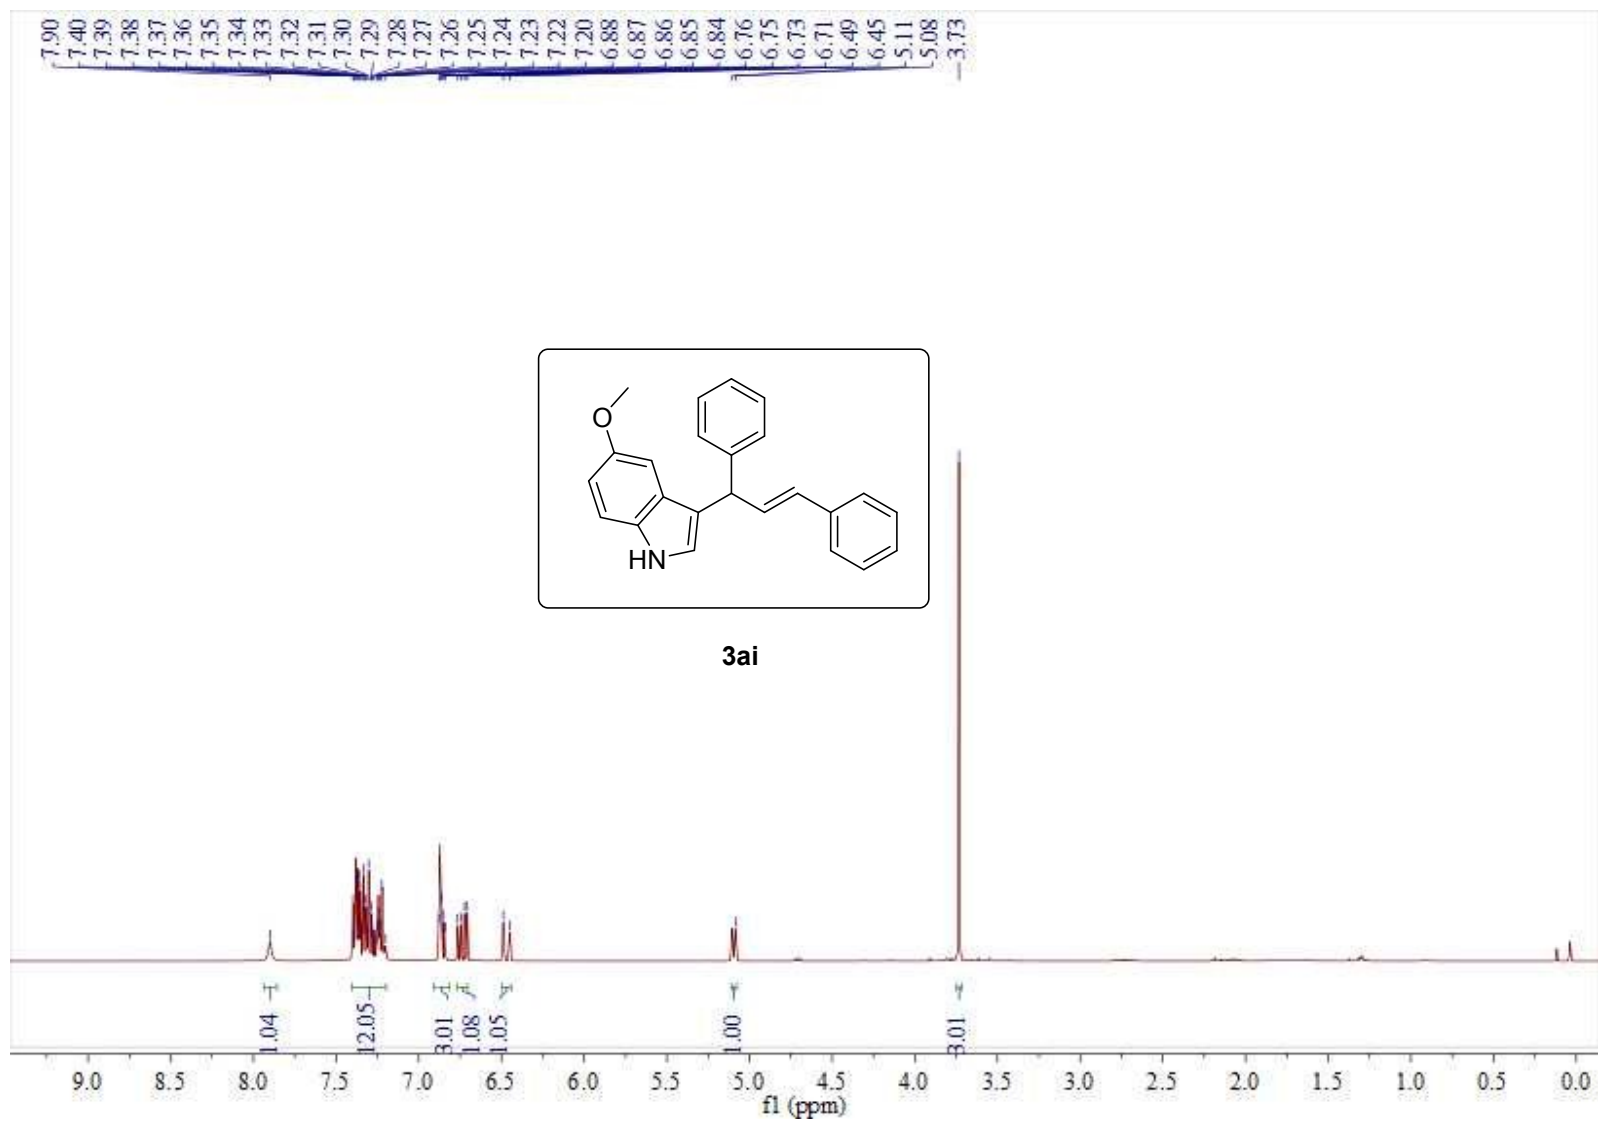

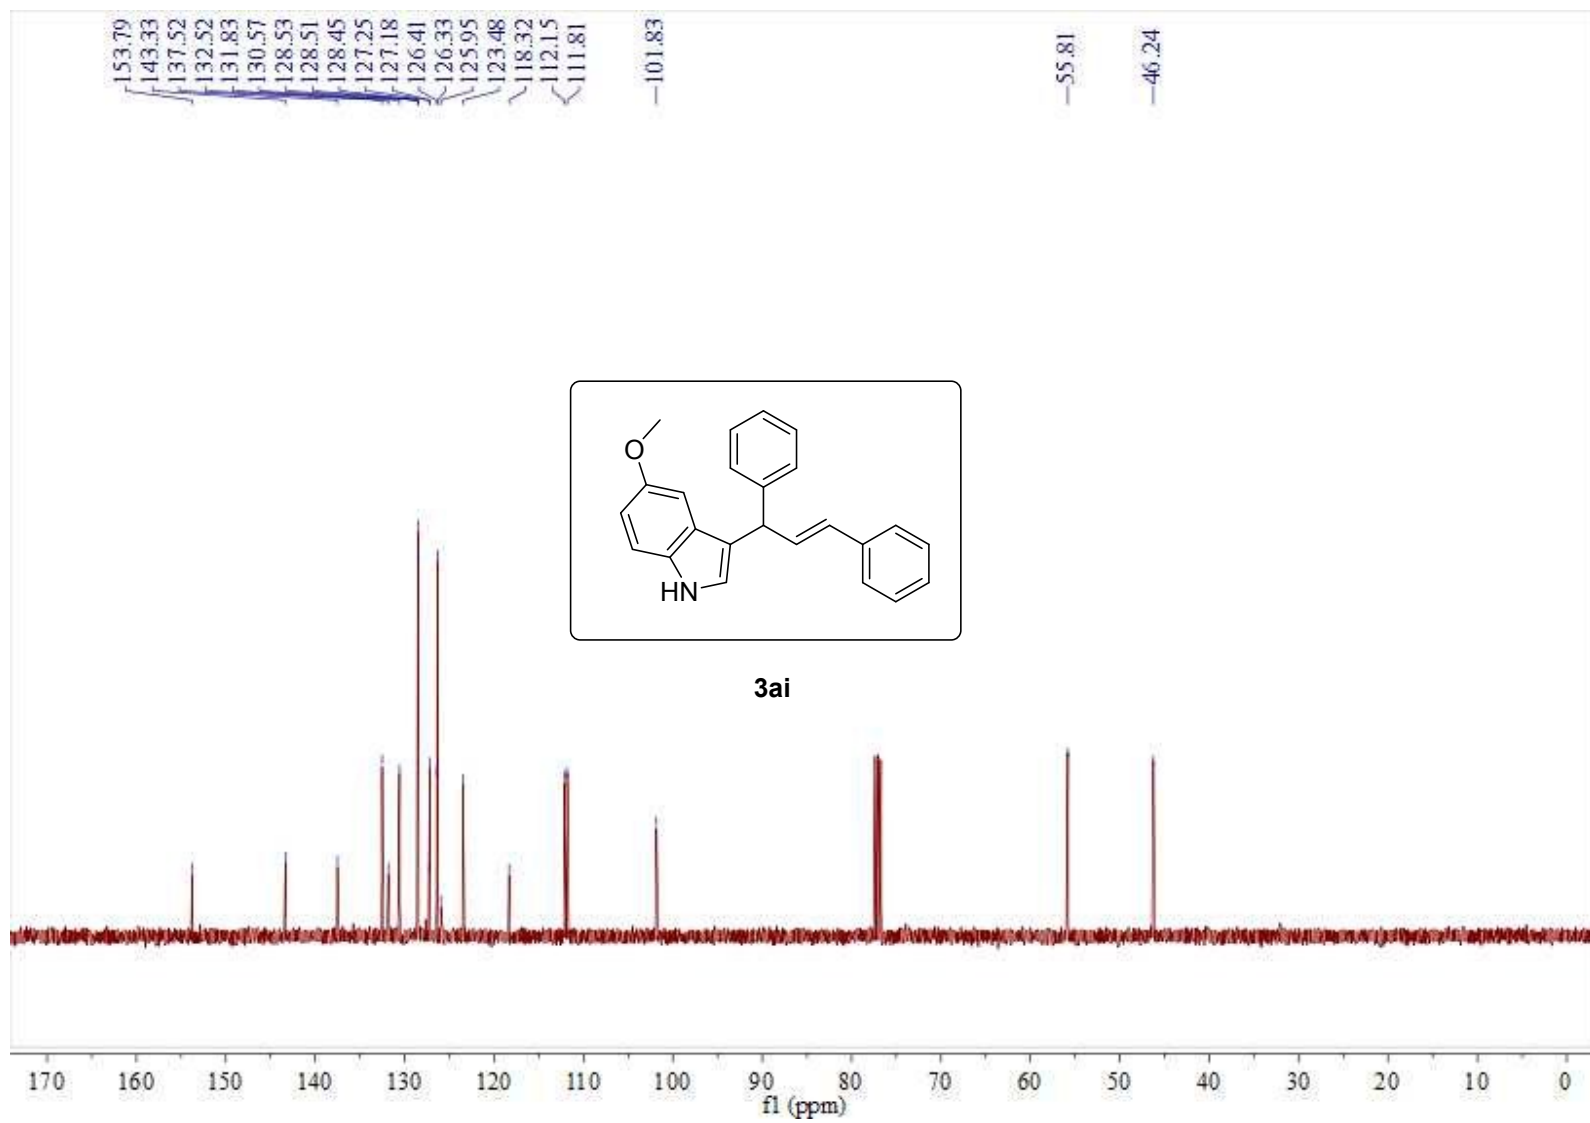

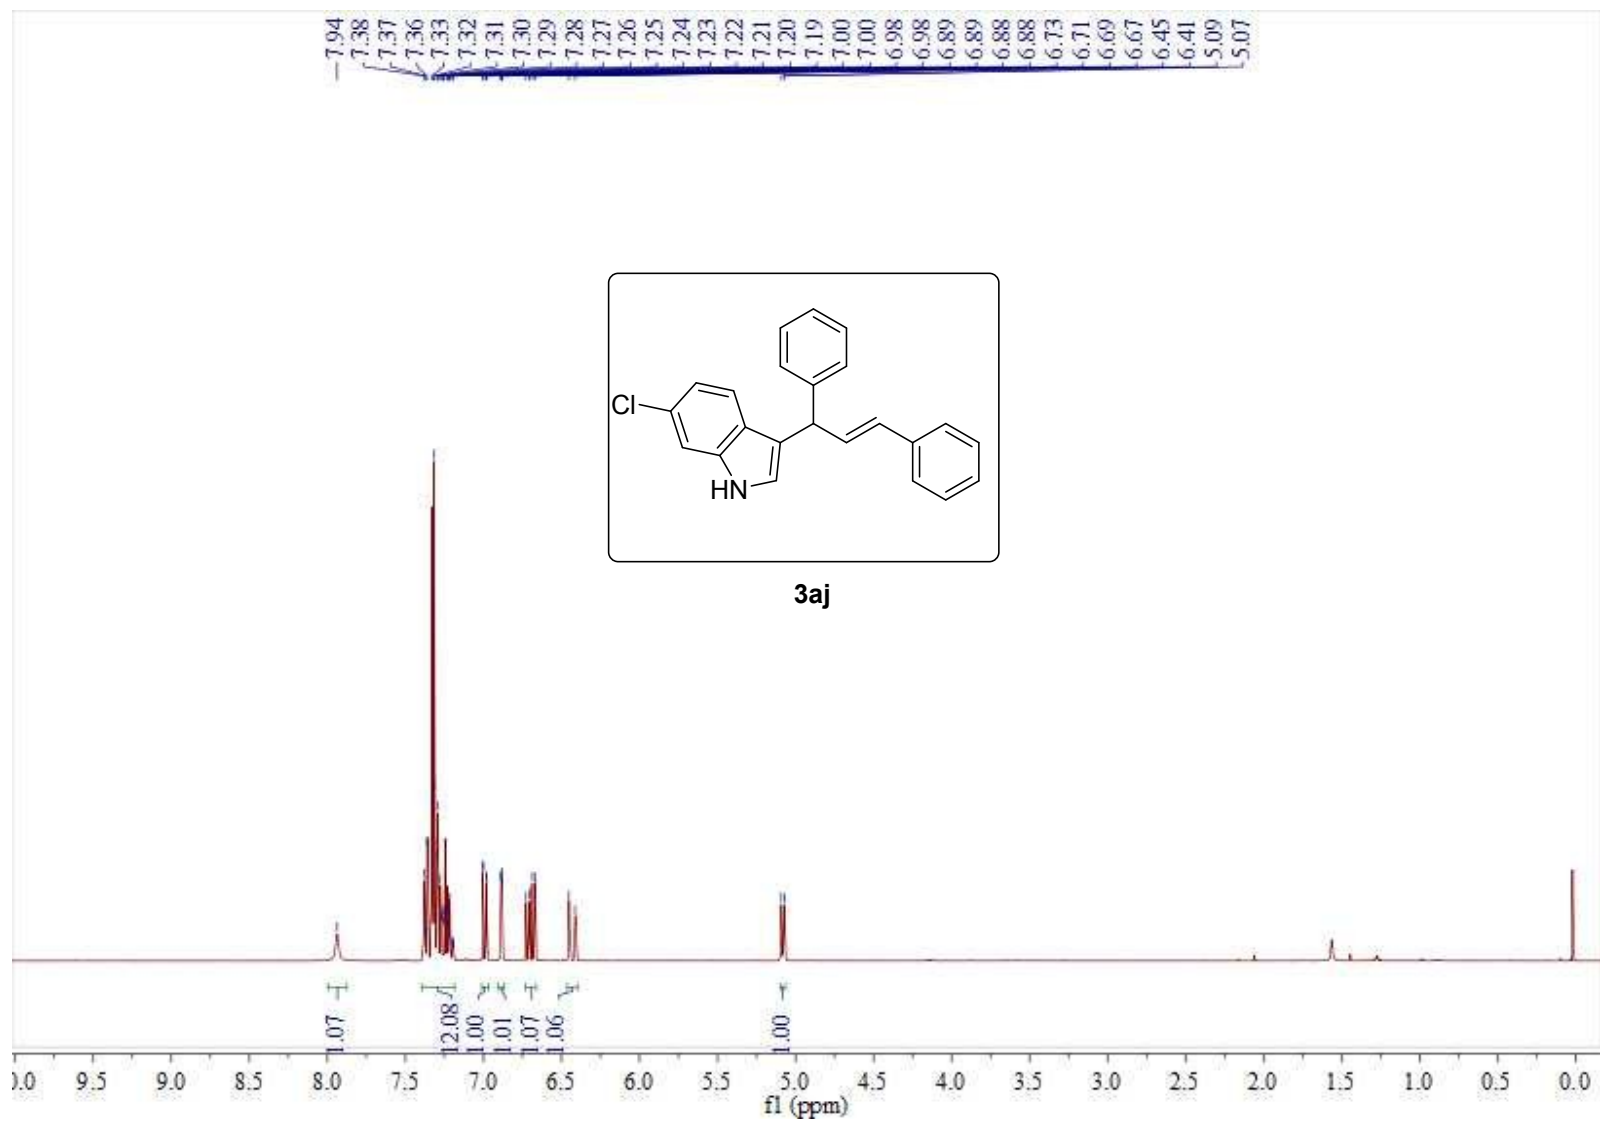

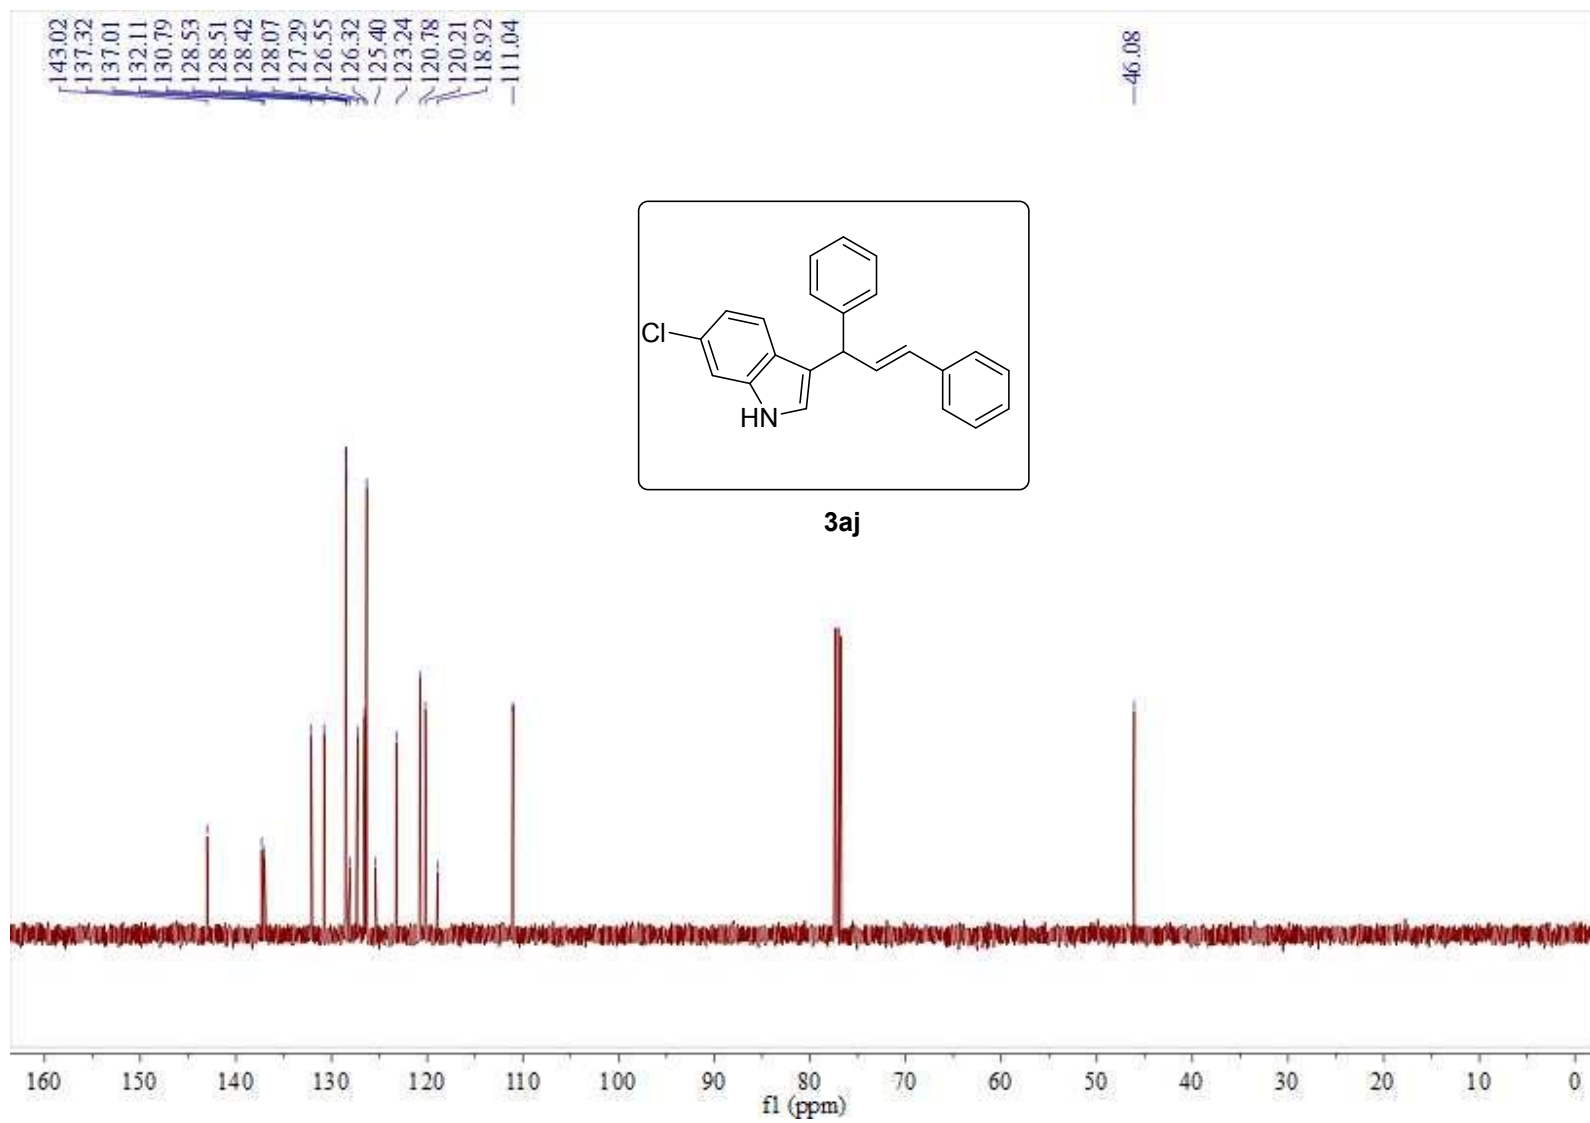

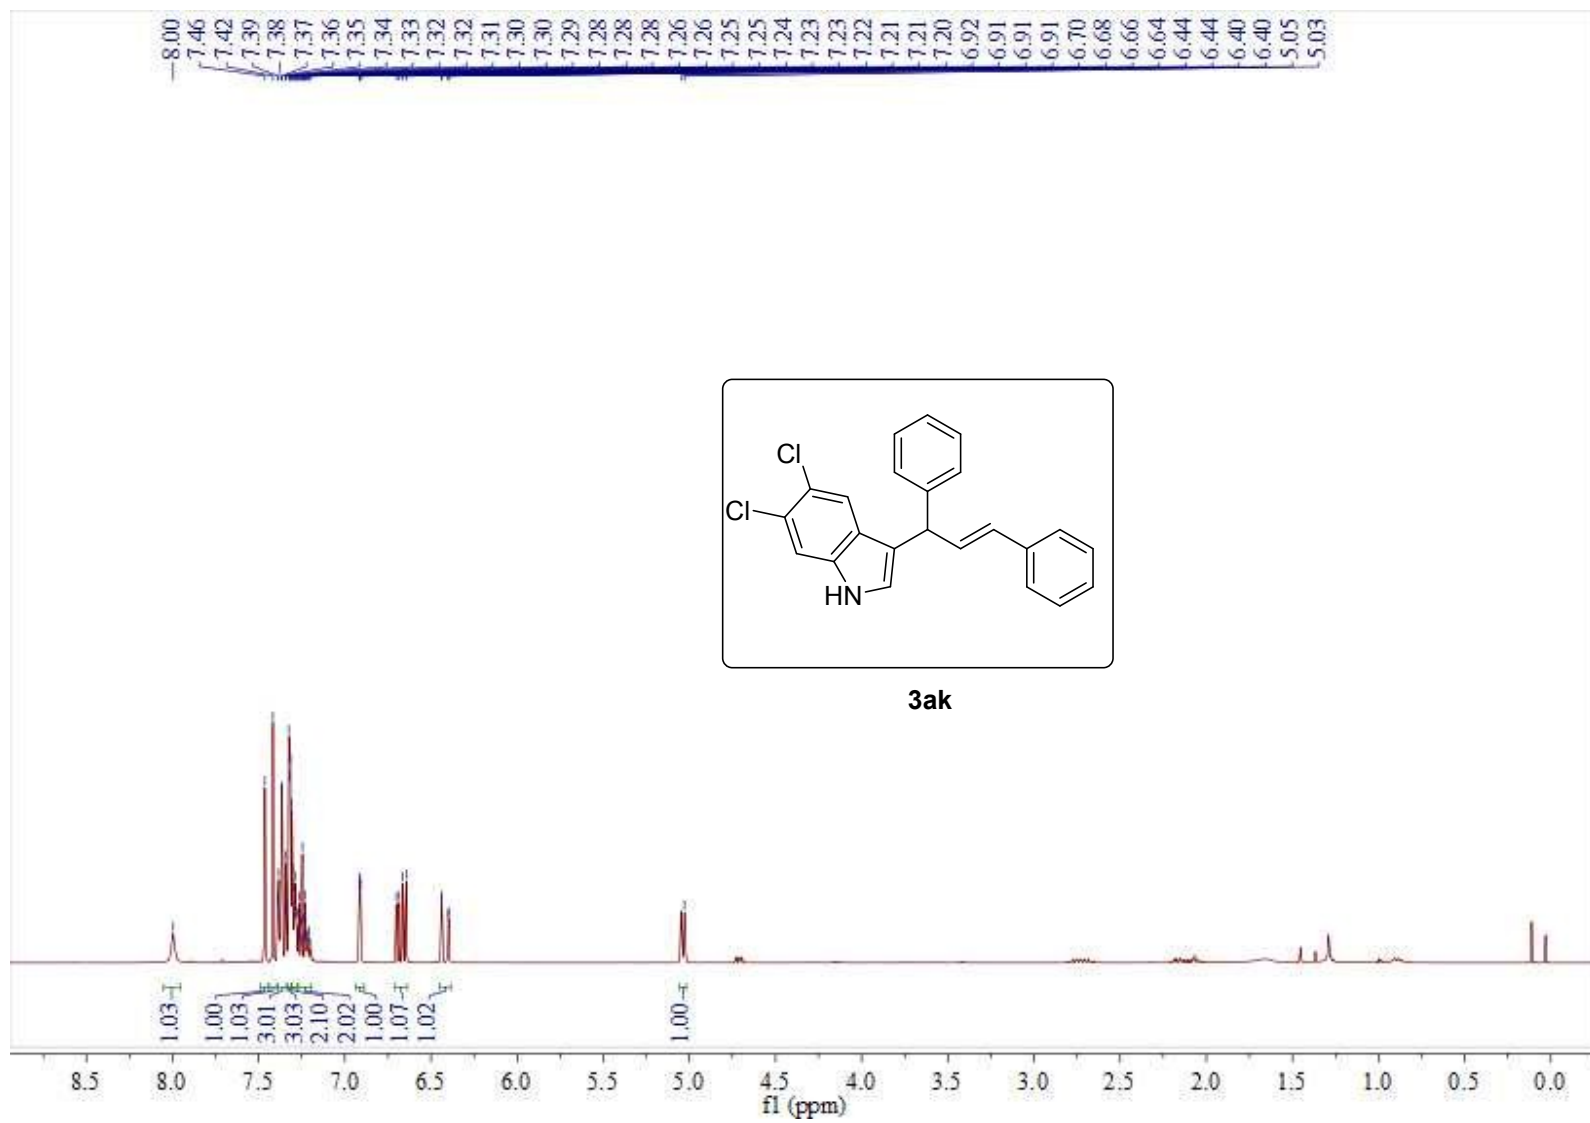

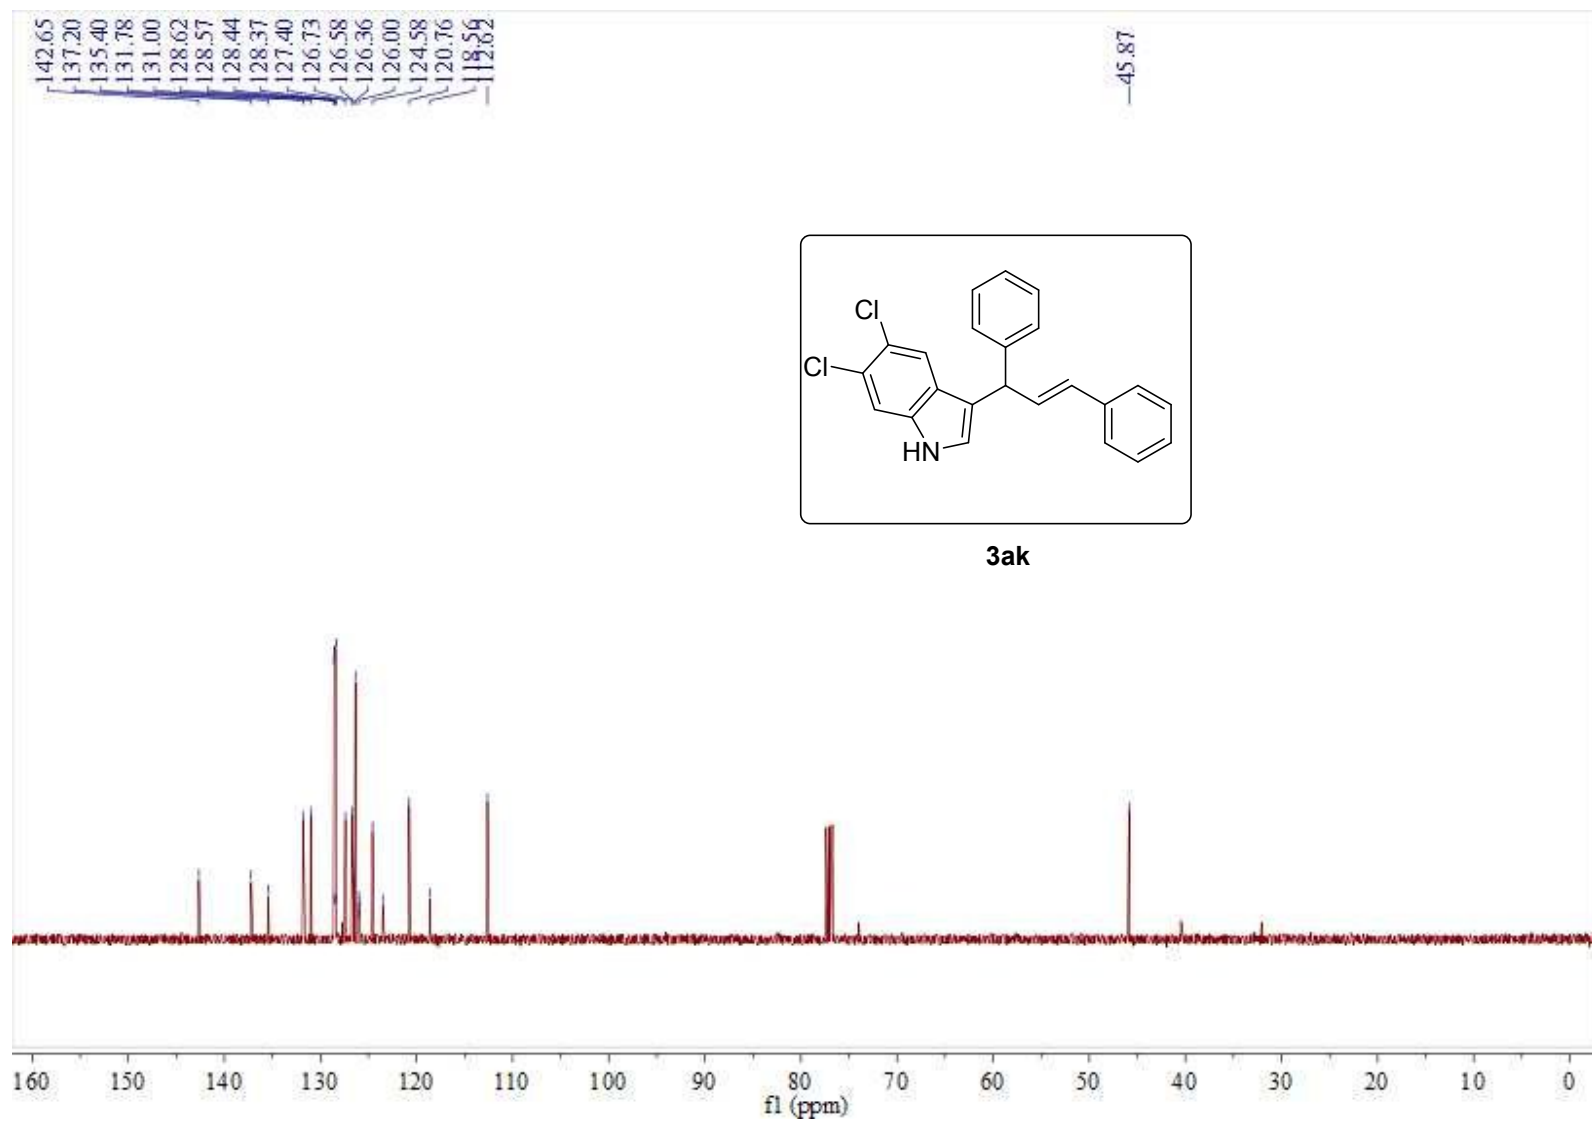

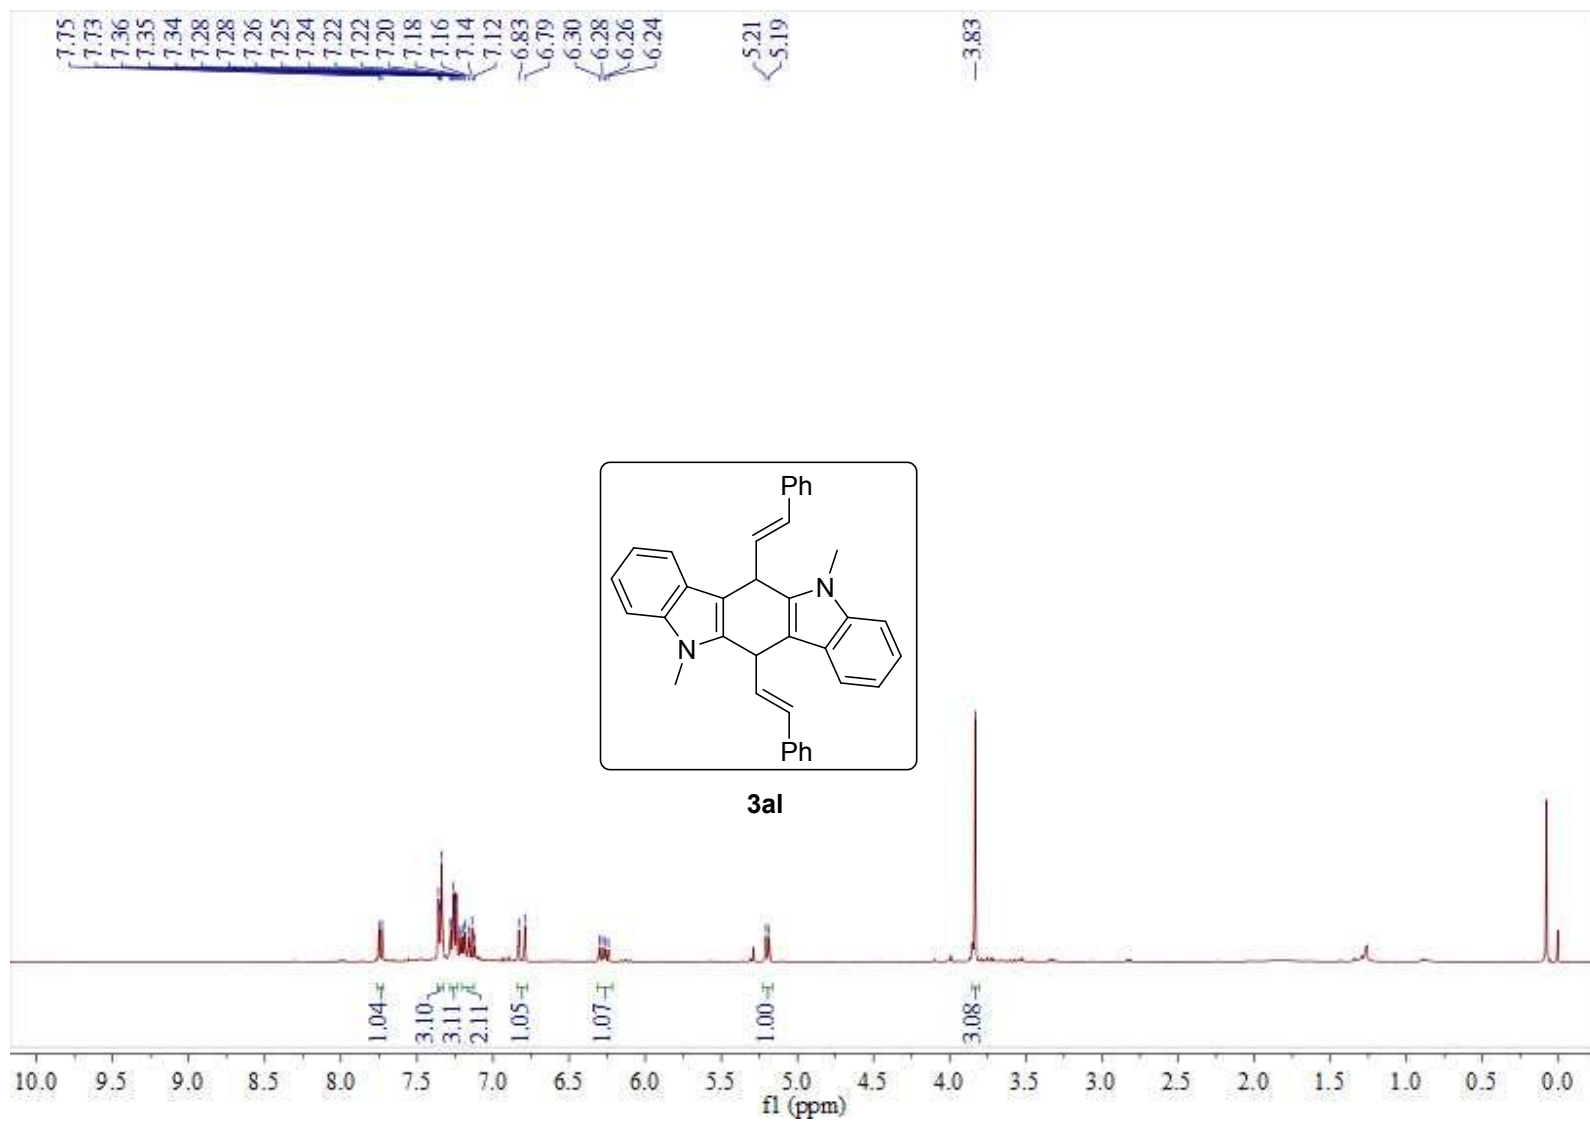

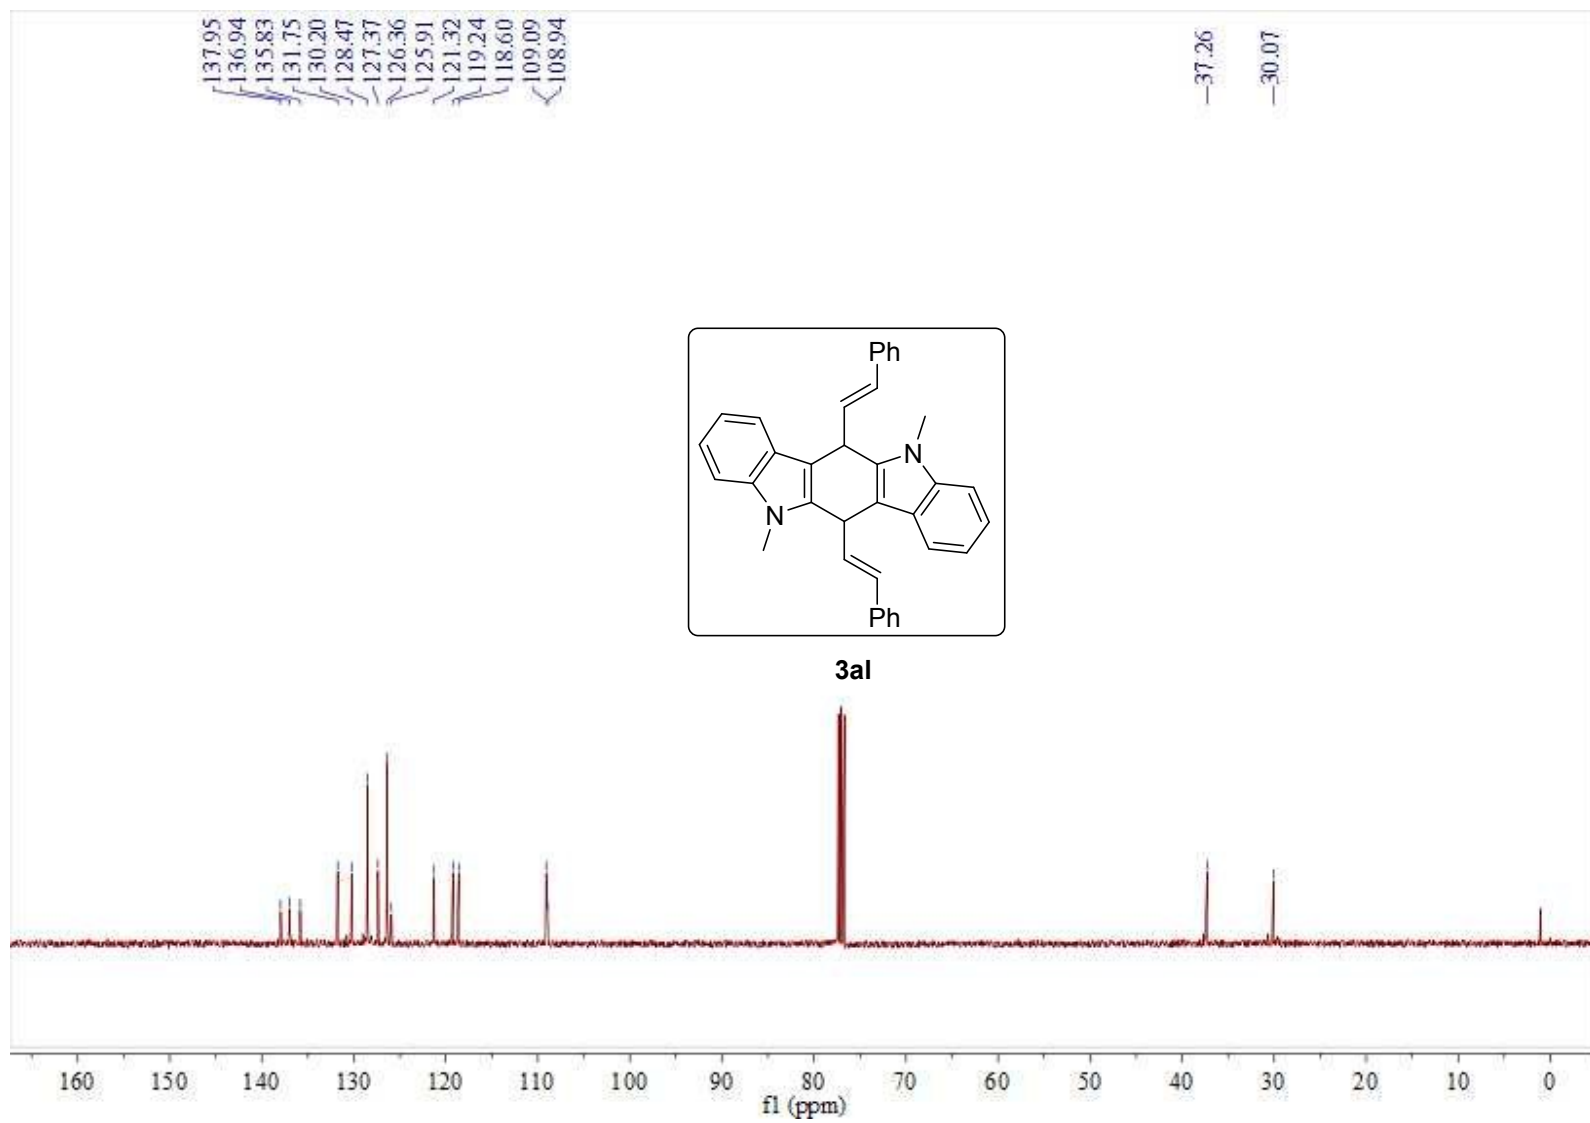



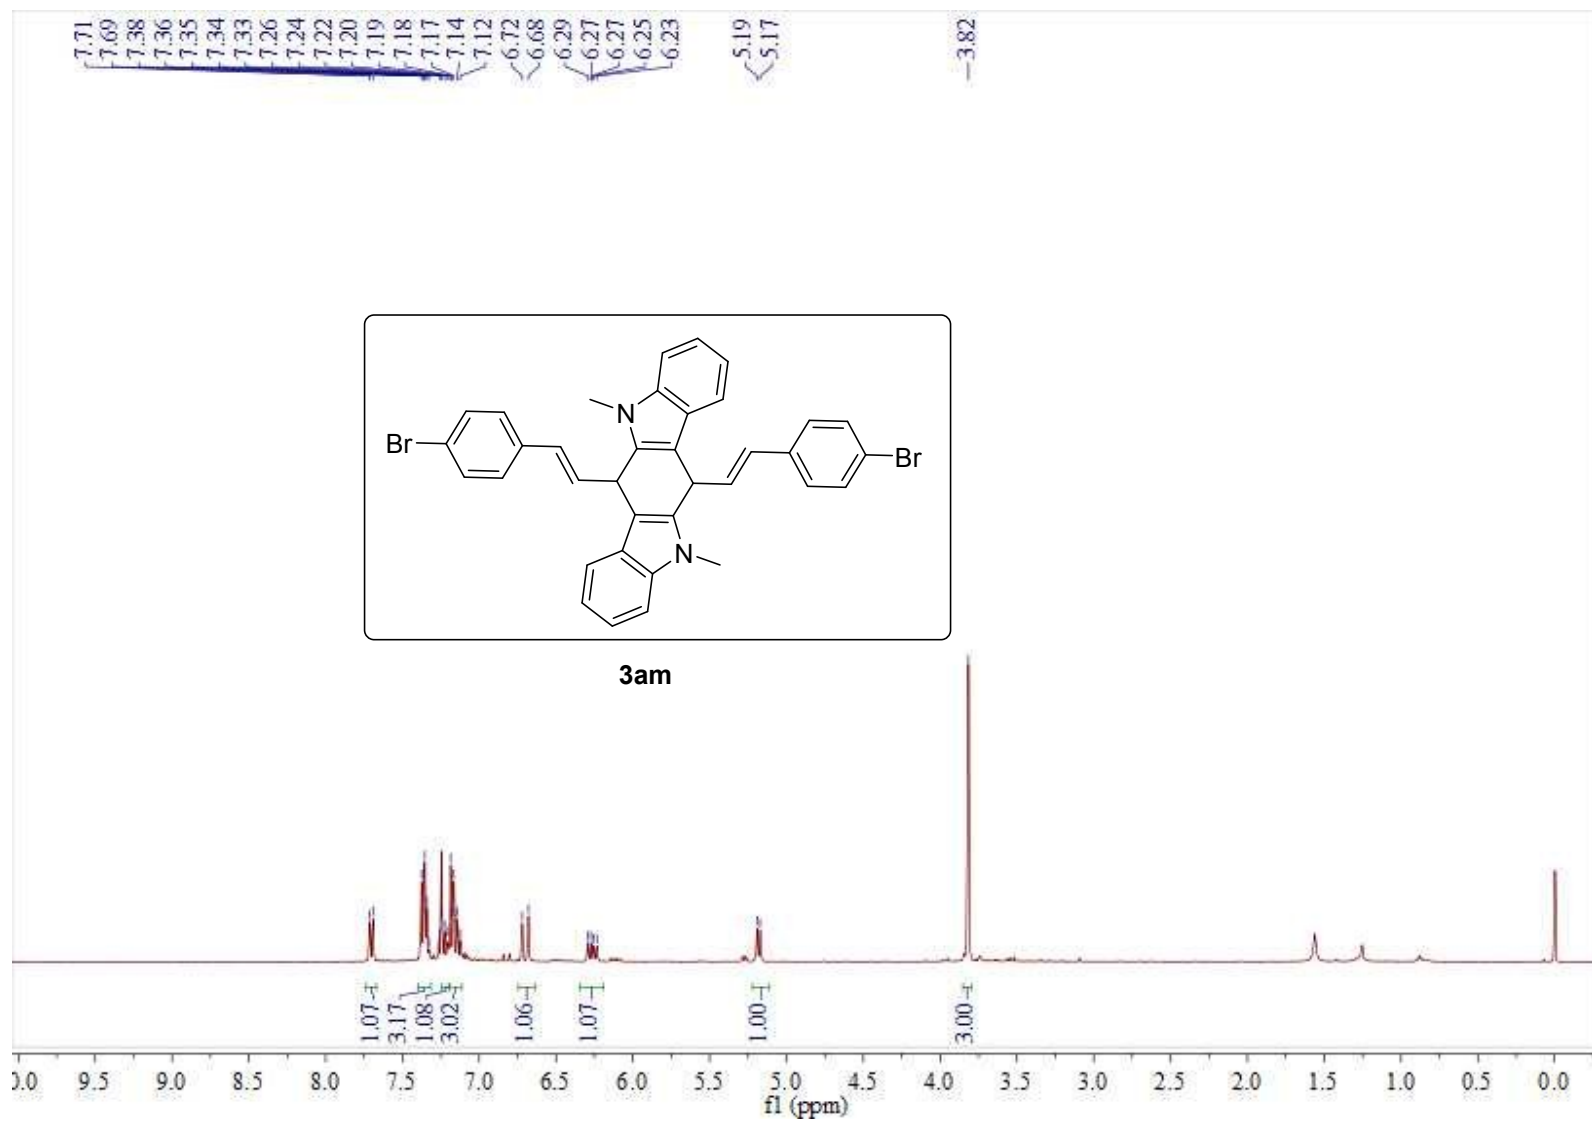

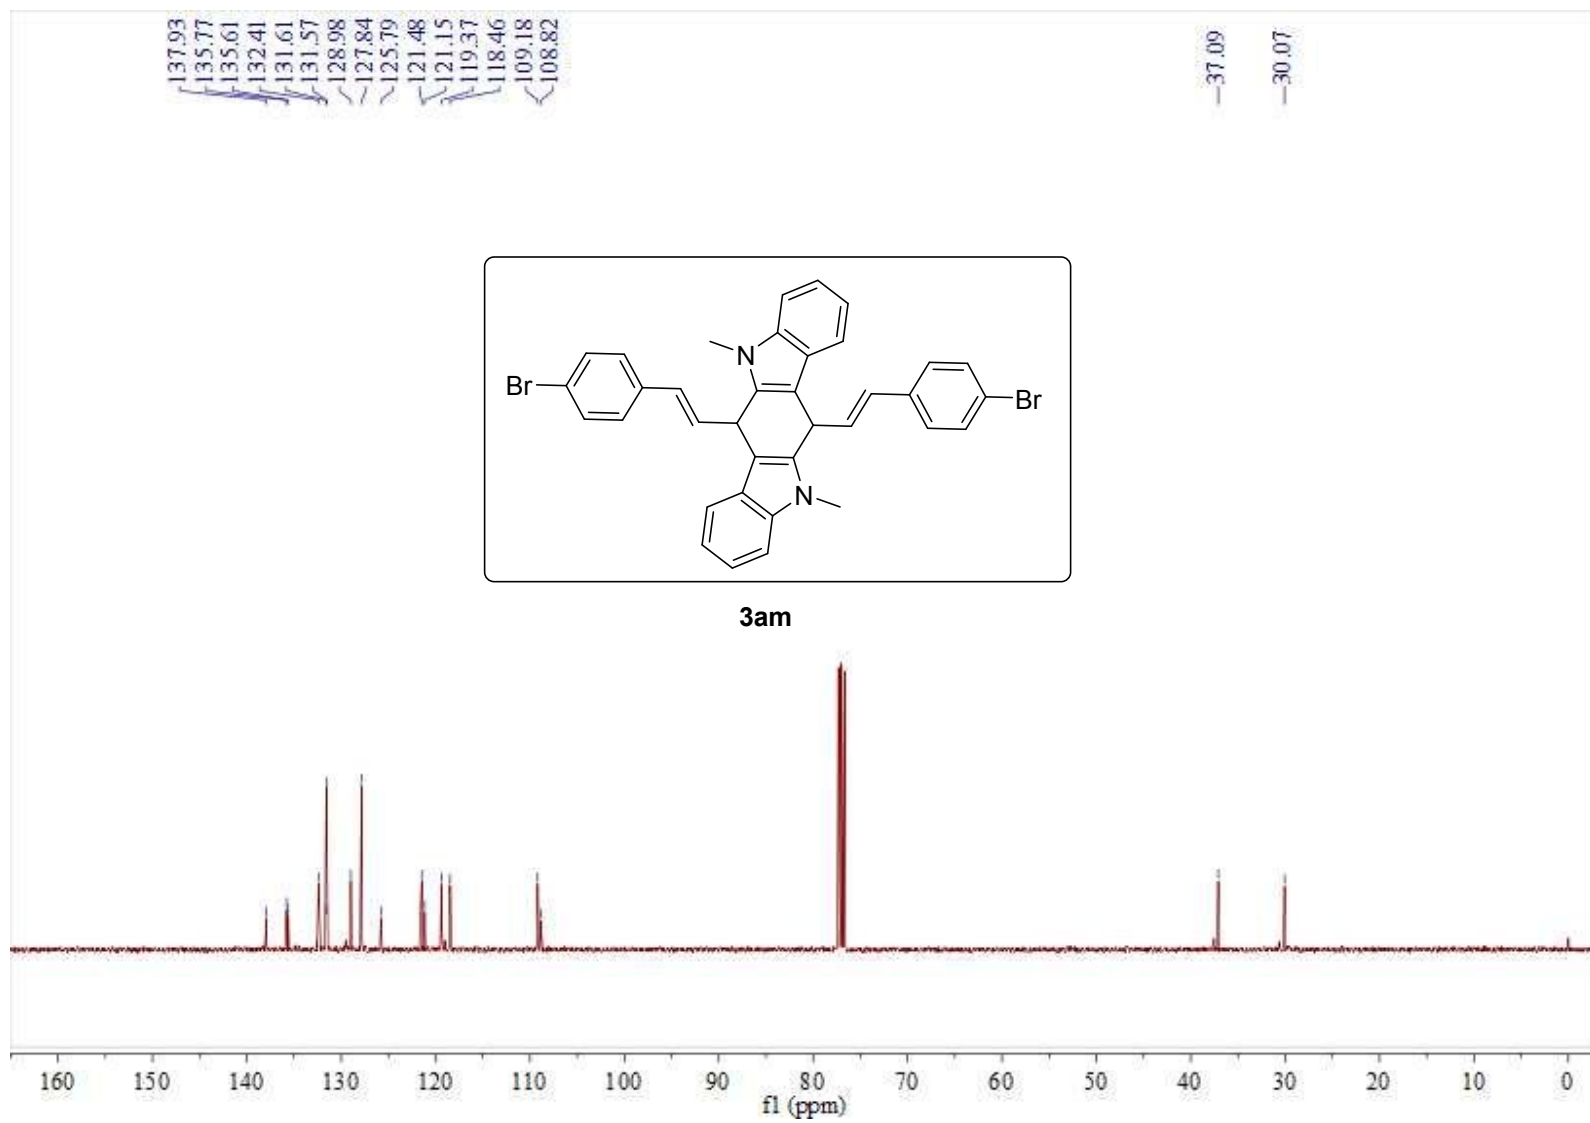

Supplement: d0ra02912b1.pdf [file d0ra02912b1.pdf]
